# Supplementary material for: Prenatal Opioid Exposure Impairs Endocannabinoid and Glutamate Transmission in the Dorsal Striatum
Source: eNeuro. 2022 Apr 19;9(2):ENEURO.0119-22.2022. doi: 10.1523/ENEURO.0119-22.2022 (PMC9034757; doi:10.1523/ENEURO.0119-22.2022)
Supplement: Figure 2-1 — Phosphoproteome DLS. This file contains the full phosphoproteomics results for males and females in the DLS. Download Figure 2-1, XLS file. [file enu-eN-NWR-0119-22-s05.xls]

## Sheet: PeptideGroups
Checked	Confidence	Annotated Sequence	Master Protein Accessions	Master Protein Descriptions	Quan Info	Abundance Ratio P-Value: (Female, PME) / (Female, PSE)	Abundance Ratio P-Value: (Male, PME) / (Female, PME)	Abundance Ratio P-Value: (Male, PSE) / (Female, PSE)	Abundance Ratio P-Value: (Male, PME) / (Male, PSE)	Abundance Ratio (log2): (Female, PME) / (Female, PSE)	Abundance Ratio (log2): (Male, PME) / (Female, PME)	Abundance Ratio (log2): (Male, PSE) / (Female, PSE)	Abundance Ratio (log2): (Male, PME) / (Male, PSE)	Abundance Ratio: (Female, PME) / (Female, PSE)	Abundance Ratio: (Male, PME) / (Female, PME)	Abundance Ratio: (Male, PSE) / (Female, PSE)	Abundance Ratio: (Male, PME) / (Male, PSE)	Abundances (Grouped): Female, PME	Abundances (Grouped): Female, PSE	Abundances (Grouped): Male, PME	Abundances (Grouped): Male, PSE	Abundances (Grouped) CV [%]: Female, PME	Abundances (Grouped) CV [%]: Female, PSE	Abundances (Grouped) CV [%]: Male, PME	Abundances (Grouped) CV [%]: Male, PSE	Found in Sample: [S18] F2: 127N, Sample, Female, PME	Found in Sample: [S21] F2: 128C, Sample, Female, PME	Found in Sample: [S24] F2: 130N, Sample, Female, PME	Found in Sample: [S30] F2: 133N, Sample, Female, PME	Found in Sample: [S22] F2: 129N, Sample, Female, PSE	Found in Sample: [S23] F2: 129C, Sample, Female, PSE	Found in Sample: [S28] F2: 132N, Sample, Female, PSE	Found in Sample: [S32] F2: 134N, Sample, Female, PSE	Found in Sample: [S17] F2: 126, Sample, Male, PME	Found in Sample: [S19] F2: 127C, Sample, Male, PME	Found in Sample: [S20] F2: 128N, Sample, Male, PME	Found in Sample: [S29] F2: 132C, Sample, Male, PME	Found in Sample: [S25] F2: 130C, Sample, Male, PSE	Found in Sample: [S26] F2: 131N, Sample, Male, PSE	Found in Sample: [S27] F2: 131C, Sample, Male, PSE	Found in Sample: [S31] F2: 133C, Sample, Male, PSE	Positions in Master Proteins	Modifications in Master Proteins	XCorr (by Search Engine): Sequest HT	Channel Occupancy [%]	# Protein Groups	Abundances (Normalized): F2: 127N, Sample, Female, PME	Abundances (Normalized): F2: 128C, Sample, Female, PME	Abundances (Normalized): F2: 130N, Sample, Female, PME
FALSE	High	[K].SADCSVEEEPWKR.[E]	P43006	Excitatory amino acid transporter 2 OS=Mus musculus GN=Slc1a2 PE=1 SV=1		0.736271	0.0516264	0.00565269	0.00025372	-0.05	0.12	-0.2	0.27	0.968	1.089	0.872	1.209	116.3	120.1	126.6	104.7	0.63	4.06	8.29	4	High	High	High	High	High	High	High	High	High	High	High	High	High	High	High	High	P43006 [558-570]	P43006 1xPhospho [S562(100)]	4.55	100	1	115.8	115.9	116.6
FALSE	High	[R].TASLTSAASIDGSR.[S]	Q9QYG0	Protein NDRG2 OS=Mus musculus GN=Ndrg2 PE=1 SV=1		0.907927	0.229346	0.0721712	0.000730194	0.05	0.15	-0.32	0.53	1.037	1.111	0.8	1.44	142.3	137.2	158	109.8	4.81	13.86	8.73	8.59	High	High	High	High	High	High	High	High	High	High	High	High	High	High	High	High	Q9QYG0 [330-343]	Q9QYG0 2xPhospho [S332(99.7); S338(100)]	4.7	100	1	141.2	129.8	144.4
FALSE	High	[K].NDGVKESSESTNTTIEDEDTK.[V]	P11798	Calcium/calmodulin-dependent protein kinase type II subunit alpha OS=Mus musculus GN=Camk2a PE=1 SV=2		0.0760816	0.701991	0.461249	0.000898374	-0.12	-0.03	0.09	-0.25	0.918	0.977	1.066	0.842	236.3	257.3	230.9	274.3	4.38	5.34	3.51	3.77	High	High	High	High	High	High	High	High	High	High	High	High	High	High	High	High	P11798 [324-344]	P11798 2xPhospho [S330(100); S331(100)]	4.46	100	1	237.3	256.9	235.4
FALSE	High	[K].KNDGVKESSESTNTTIEDEDTK.[V]	P11798	Calcium/calmodulin-dependent protein kinase type II subunit alpha OS=Mus musculus GN=Camk2a PE=1 SV=2		0.968909	0.144902	0.130071	0.0011348	-0.05	-0.19	0.2	-0.44	0.965	0.875	1.148	0.735	70.1	72.6	61.3	83.4	3.91	11.3	10.62	6.79	High	High	High	High	High	High	High	High	High	High	High	High	High	High	High	High	P11798 [323-344]		4.96	100	1	69.3	70.8	65.9
FALSE	High	[K].KAEGATLSNATGAVESTSQAGDRGSVSSYDR.[G]	Q61644	Protein kinase C and casein kinase substrate in neurons protein 1 OS=Mus musculus GN=Pacsin1 PE=1 SV=1		0.812408	0.150036	0.286957	0.00134525	0.05	0.51	-0.27	0.83	1.036	1.429	0.83	1.783	27	26	38.6	21.6	16.17	3.96	13.91	18.63	High	High	High	High	High	High	High	High	High	High	High	High	High	High	High	High	Q61644 [319-349]	Q61644 1xPhospho [S343(95.3)]	4.28	100	1	35.8	26.3	27.7
FALSE	High	[R].SLSTSGESLYHVLGLDKNATSDDIKK.[S]	G5E8T0	DnaJ (Hsp40) homolog, subfamily C, member 5, isoform CRA_b OS=Mus musculus GN=Dnajc5 PE=1 SV=1		0.77512	0.0574773	0.65543	0.00147951	0.5	0.73	-0.26	1.49	1.41	1.661	0.836	2.803	21	14.9	34.9	12.4	39.13	31.63	20.77	20.99	High	High	High	High	High	High	High	High	High	High	High	High	High	High	High	High	G5E8T0 [8-33]	G5E8T0 1xPhospho [S10(97.3)]	4.79	100	1	26.6	10.1	17.1
FALSE	High	[R].SASEPSLNR.[A]	P28028; F6SZ47	Serine/threonine-protein kinase B-raf OS=Mus musculus GN=Braf PE=1 SV=3 Serine/threonine-protein kinase B-raf (Fragment) OS=Mus musculus GN=Braf PE=1 SV=1	Shared	0.782536	0.116292	0.0225594	0.00164903	-0.04	0.08	-0.15	0.19	0.974	1.056	0.901	1.142	409	419.8	431.7	378	2.74	5.77	5.28	1.2	High	High	High	High	High	High	High	High	High	High	High	High	High	High	High	High	P28028 [764-772]; F6SZ47 [711-719]	P28028 1xPhospho [S766(100)]; F6SZ47 1xPhospho [S713(100)]	2.72	100	2	419	404	414
FALSE	High	[R].GGSSGEELEDEEPVKK.[R]	Q3UMU9	Hepatoma-derived growth factor-related protein 2 OS=Mus musculus GN=Hdgfrp2 PE=1 SV=1		0.999955	0.0768164	0.225097	0.00206805	0.03	-0.21	0.18	-0.37	1.018	0.865	1.136	0.775	101	99.3	87.4	112.8	4.56	7.76	6.99	5.66	High	High	High	High	High	High	High	High	High	High	High	High	High	High	High	High	Q3UMU9 [364-379]	Q3UMU9 2xPhospho [S366(100); S367(100)]	5.43	100	1	97.9	104.7	95.5
FALSE	High	[R].VNVPVIGGHAGK.[T]	P08249	Malate dehydrogenase, mitochondrial OS=Mus musculus GN=Mdh2 PE=1 SV=3		0.222696	0.217729	0.926327	0.00235683	-0.29	-0.28	0.11	-0.68	0.821	0.821	1.077	0.626	11.2	13.7	9.2	14.8	3.51	19.76	3.95	12.26	High	High	High	High	High	High	High	High	High	High	High	High	High	High	High	High	P08249 [192-203]		4.38	100	1	11.7	11.4	10.8
FALSE	High	[K].SSDWSSEEEEPVR.[K]	Q8BH66	Atlastin-1 OS=Mus musculus GN=Atl1 PE=1 SV=1		0.0552755	0.901266	0.692747	0.00249621	-0.43	-0.09	0.22	-0.74	0.741	0.942	1.168	0.597	9.9	13.3	9.3	15.6	9.03	16.37	17.32	11.43	High	High	High	High	High	High	High	High	High	High	High	High	High	High	High	High	Q8BH66 [18-30]	Q8BH66 2xPhospho [S22(100); S23(100)]	1.09	100	1	9.2	11.3	9.6
FALSE	High	[K].MASPPPSGPPSAAHTPFHQSPVEEK.[S]	A2ARP8	Microtubule-associated protein 1A OS=Mus musculus GN=Map1a PE=1 SV=1		0.641588	0.91785	0.0625786	0.00262657	0.2	-0.08	-0.33	0.45	1.151	0.943	0.797	1.362	20.7	18	19.5	14.3	13.4	7.28	16.49	2.04	High	High	High	High	High	High	High	High	High	High	High	High	High	High	High	High	A2ARP8 [1227-1251]	A2ARP8 3xPhospho [S1229(100); S1233(100); S1246(100)]	2.78	100	1	21.2	21.7	15.9
FALSE	High	[R].LEEGVASDEEEAEGAEPGSAPGQEPEAPPPATPQ.[-]	A0A140LI60	Myosin-14 (Fragment) OS=Mus musculus GN=Myh14 PE=1 SV=1		0.94534	0.00260427	0.955875	0.00278999	0.03	-0.52	0.01	-0.5	1.021	0.698	1.008	0.707	16.2	15.9	11.3	16	15.61	8.85	9.23	2.61	High	High	High	High	High	High	High	High	High	High	High	High	High	High	High	High	A0A140LI60 [1212-1245]	A0A140LI60 1xPhospho [S1218(100)]	8.22	100	1	16.9	15.5	13.3
FALSE	High	[K].TQSDDSGDDDEEPAAPADNSELHHTLK.[T]	Q5QNQ6	Oxysterol-binding protein 2 OS=Mus musculus GN=Osbp2 PE=1 SV=1		0.999157	0.253924	0.0700894	0.00292774	0.02	0.21	-0.29	0.52	1.014	1.154	0.818	1.43	64.1	63.2	73.9	51.7	20.06	4.98	5.39	3.5	High	High	High	High	High	High	High	High	High	High	High	High	High	High	High	High	Q5QNQ6 [279-305]	Q5QNQ6 1xPhospho [S284(100)]	6.85	100	1	77.6	58.5	70.1
FALSE	High	[R].DTDAYSDLSDGEKEAR.[F]	Q3TY60	Protein FAM131B OS=Mus musculus GN=Fam131b PE=1 SV=1		0.605301	0.999999	0.0285559	0.00315564	0.12	0.01	-0.16	0.29	1.086	1.01	0.896	1.223	129.9	119.6	131.1	107.2	3.98	4.32	6.45	9.9	High	High	High	High	High	High	High	High	High	High	High	High	High	High	High	High	Q3TY60 [109-124]	Q3TY60 2xPhospho [S114(100); S117(100)]	5.02	100	1	130.4	120.2	131.1
FALSE	High	[K].APSDDGSLK.[S]	B2RRE2	Myo18a protein OS=Mus musculus GN=Myo18a PE=1 SV=1		0.340957	0.973241	0.137207	0.00325457	-0.18	-0.12	0.51	-0.81	0.884	0.918	1.425	0.569	19.7	22.3	18.1	31.7	12.19	29.44	8.57	16.27	High	High	High	High	High	High	High	High	High	High	High	High	High	High	High	High	B2RRE2 [1989-1997]	B2RRE2 1xPhospho [S1991(100)]	2.66	100	1	18.3	21.1	21.5
FALSE	High	[R].SGSRPQSPSGDAESR.[G]	Q8BNW9	Kelch repeat and BTB domain-containing protein 11 OS=Mus musculus GN=Kbtbd11 PE=1 SV=3		0.966734	0.206232	0.0769734	0.00441469	0.02	-0.18	0.17	-0.32	1.017	0.885	1.126	0.8	58.6	57.6	51.9	64.8	8.18	1.8	7.61	10.56	High	High	High	High	High	High	High	High	High	High	High	High	High	High	High	High	Q8BNW9 [314-328]	Q8BNW9 1xPhospho [S320(100)]	2.47	100	1	55.7	64.4	54.1
FALSE	High	[R].TPEELEDDSDFEQEDYDVRSR.[T]	E0CXB9	Catenin alpha-2 OS=Mus musculus GN=Ctnna2 PE=1 SV=1		0.507803	0.631261	0.00372603	0.00537299	-0.1	0.09	-0.37	0.36	0.93	1.066	0.774	1.28	44.1	47.4	47	36.7	6.63	8.95	12.51	3.28	High	High	High	High	High	High	High	High	High	High	High	High	High	High	High	High	E0CXB9 [645-665]	E0CXB9 2xPhospho [S653(100); S664(100)]	3.78	100	1	43.5	40.9	44.8
FALSE	High	[R].RQSRSPSEGR.[S]	A0A087WS83	Voltage-dependent R-type calcium channel subunit alpha OS=Mus musculus GN=Cacna1e PE=1 SV=1		0.760727	0.0141496	0.972233	0.0053967	-0.24	-1.04	0.01	-1.3	0.845	0.485	1.006	0.407	13.4	15.9	6.5	16	20.71	15.48	41.89	21.25	High	High	High	High	High	High	High	High	High	High	High	High	High	High	High	High	A0A087WS83 [2077-2086]	A0A087WS83 3xPhospho [S2079(100); S2081(100); S2083(100)]	2.15	100	1	11.5	17.5	15.3
FALSE	High	[R].SNSTSSMSSGLPEQDR.[M]	Q4JIM5	Abelson tyrosine-protein kinase 2 OS=Mus musculus GN=Abl2 PE=1 SV=1		0.00478192	0.923213	0.945024	0.00541439	0.6	0.03	-0.04	0.66	1.512	1.019	0.975	1.58	10.8	7.1	11	6.9	18.64	16.22	13.4	6.13	High	High	High	High	High	High	High	High	High	High	High	High	High	High	High	High	Q4JIM5 [783-798]	Q4JIM5 1xPhospho [S785(99.2)]	2.7	100	1	11.5	10.1	9.9
FALSE	High	[K].SSLGNDETDKEK.[K]	F6RR81	Protein cordon-bleu (Fragment) OS=Mus musculus GN=Cobl PE=1 SV=8		0.234893	0.203227	0.00657309	0.00556099	0.12	-0.14	0.23	-0.25	1.089	0.907	1.172	0.843	31.2	28.6	28.3	33.5	7.31	4.12	6.88	5.57	High	High	High	High	High	High	High	High	High	High	High	High	High	High	High	High	F6RR81 [141-152]	F6RR81 1xPhospho [S142(100)]	2.49	100	1	30.3	32	28.3
FALSE	High	[K].SKEEQELHDIHSTRSKER.[L]	P35802	Neuronal membrane glycoprotein M6-a OS=Mus musculus GN=Gpm6a PE=1 SV=1		0.995179	0.0530546	0.496783	0.00642085	0.05	0.33	-0.19	0.56	1.035	1.254	0.879	1.477	64.9	62.7	81.4	55.1	18.69	15.93	2.11	10.03	High	High	High	High	High	High	High	High	High	High	High	High	High	High	High	High	P35802 [256-273]		3.26	100	1	73.2	46.6	61.1
FALSE	High	[K].SWSFGDR.[S]	B7ZBV9; B7ZBW2	Potassium voltage-gated channel subfamily KQT member 2 OS=Mus musculus GN=Kcnq2 PE=1 SV=1 Potassium voltage-gated channel subfamily KQT member 2 OS=Mus musculus GN=Kcnq2 PE=1 SV=2	Shared	0.597956	0.382608	0.00402314	0.00793293	0.1	-0.11	-0.37	0.36	1.072	0.929	0.774	1.287	55.5	51.8	51.6	40.1	2.31	11.06	6.84	9.46	High	High	High	High	High	High	High	High	High	High	High	High	High	High	High	High	B7ZBV9 [483-489]; B7ZBW2 [453-459]	B7ZBV9 1xPhospho [S485(100)]; B7ZBW2 1xPhospho [S455(100)]	1.75	100	2	54.9	54.8	57.5
FALSE	High	[K].WLEEADSSTGSPTSIDK.[I]	P31361	POU domain, class 3, transcription factor 3 OS=Mus musculus GN=Pou3f3 PE=2 SV=2		0.715581	0.303518	0.0306828	0.0079515	-0.24	0.28	-0.67	0.71	0.848	1.214	0.63	1.632	9.9	11.7	12	7.4	14.23	5.38	14.51	31.4	High	High	High	High	High	High	High	High	High	High	High	High	High	High	High	High	P31361 [380-396]	P31361 1xPhospho [S390(99.6)]	3.79	100	1	9.1	8.9	11.9
FALSE	High	[K].AAATPESQEPQAK.[G]	P28667	MARCKS-related protein OS=Mus musculus GN=Marcksl1 PE=1 SV=2		0.715902	0.99999	0.048871	0.00800603	0.1	-0.02	-0.25	0.33	1.068	0.99	0.842	1.256	128.1	119.9	126.7	100.9	9.66	4.25	9.89	7.27	High	High	High	High	High	High	High	High	High	High	High	High	High	High	High	High	P28667 [145-157]	P28667 2xPhospho [T148(100); S151(100)]	4.92	100	1	117.4	119.6	137.2
FALSE	High	[K].VLAGQEYAAK.[I]	P11798	Calcium/calmodulin-dependent protein kinase type II subunit alpha OS=Mus musculus GN=Camk2a PE=1 SV=2		0.518697	0.898126	0.0279667	0.00801331	0.08	0.01	-0.54	0.63	1.057	1.009	0.688	1.55	8.8	8.3	8.9	5.7	21.45	4.67	20.91	6.84	High	High	High	High	High	High	High	High	High	High	High	High	High	High	High	High	P11798 [33-42]		3.16	100	1	8.3	9.3	8.3
FALSE	High	[K].KKGSLDSDNDDSDCPYSEKVPSIK.[I]	O88343	Electrogenic sodium bicarbonate cotransporter 1 OS=Mus musculus GN=Slc4a4 PE=1 SV=2		0.00176573	0.00135192	0.0107069	0.00806684	-0.34	0.4	-0.3	0.37	0.793	1.324	0.813	1.29	32.3	40.8	42.8	33.2	11.17	9.19	7.28	3.24	High	High	High	High	High	High	High	High	High	High	High	High	High	High	High	High	O88343 [1023-1046]		3.57	100	1	26	33.7	32
FALSE	High	[K].ESSESTNTTIEDEDTK.[V]	P11798	Calcium/calmodulin-dependent protein kinase type II subunit alpha OS=Mus musculus GN=Camk2a PE=1 SV=2		0.996009	0.304579	0.257147	0.00809189	-0.08	-0.16	0.2	-0.44	0.948	0.894	1.151	0.737	86.1	90.8	77	104.5	10.29	9.7	10.34	12.29	High	High	High	High	High	High	High	High	High	High	High	High	High	High	High	High	P11798 [329-344]	P11798 1xPhospho [S333(99.7)]	4.06	100	1	86.9	101.2	79.9
FALSE	High	[R].SAEPTREPGAEAESGSESEPEPGPGPR.[L]	Q9Z2R6	Protein unc-119 homolog A OS=Mus musculus GN=Unc119 PE=1 SV=1		0.803527	0.687063	0.248339	0.00827696	0.13	0.16	-0.23	0.53	1.096	1.121	0.851	1.443	20.2	18.4	22.6	15.7	10.71	7.87	10.55	18.34	High	High	High	High	High	High	High	High	High	High	High	High	High	High	High	High	Q9Z2R6 [24-50]	Q9Z2R6 3xPhospho [S37(100); S39(100); S41(100)]	4.52	100	1	18.4	21.8	18.6
FALSE	High	[R].GEGAQDEEEGGASSDATEGHDEDDEIYEGEYQGIPR.[A]	Q9JIS5	Synaptic vesicle glycoprotein 2A OS=Mus musculus GN=Sv2a PE=1 SV=1		0.432878	0.988612	0.205573	0.00845212	-0.1	-0.13	0.55	-0.78	0.935	0.913	1.462	0.584	89	95.2	81.3	139.2	17.06	29.23	17.24	7	High	High	High	High	High	High	High	High	High	High	High	High	High	High	High	High	Q9JIS5 [68-103]		7.75	100	1	83	95.6	69.4
FALSE	High	[K].SESGYGFNVR.[G]	Q3UHD6	Sorting nexin-27 OS=Mus musculus GN=Snx27 PE=1 SV=2		0.993396	0.766614	0.0731536	0.00852706	0.07	0.22	-0.57	0.87	1.049	1.169	0.672	1.823	88.3	84.1	103.1	56.6	26.9	23.05	11.92	9.18	High	High	High	High	High	High	High	High	High	High	High	High	High	High	High	High	Q3UHD6 [47-56]	Q3UHD6 1xPhospho [S49(100)]	2.23	100	1	116.5	90.2	86.3
FALSE	High	[R].RSPSLER.[S]	Q5HZJ0	Ribonuclease 3 OS=Mus musculus GN=Drosha PE=1 SV=1		0.984341	0.329519	0.30894	0.00893269	-0.11	-0.21	0.25	-0.57	0.929	0.862	1.185	0.675	9.2	9.9	8	11.8	14.4	19.62	14.97	16.51	High	High	High	High	High	High	High	High	High	High	High	High	High	High	High	High	Q5HZJ0 [298-304]	Q5HZJ0 2xPhospho [S299(100); S301(100)]	1.77	100	1	8.3	10.2	10.5
FALSE	High	[K].YEDIKSKEEQELHDIHSTR.[S]	P35802	Neuronal membrane glycoprotein M6-a OS=Mus musculus GN=Gpm6a PE=1 SV=1		0.98388	0.134135	0.629571	0.00899829	0.07	0.55	-0.16	0.78	1.049	1.465	0.893	1.722	45.3	43.1	66.3	38.5	32.06	16.78	15.83	13.65	High	High	High	High	High	High	High	High	High	High	High	High	High	High	High	High	P35802 [251-269]		2.51	100	1	70.7	40.6	50.5
FALSE	High	[K].GILAADESTGSIAK.[R]	A6ZI44	Fructose-bisphosphate aldolase OS=Mus musculus GN=Aldoa PE=1 SV=1		0.988247	0.271458	0.143043	0.00917312	-0.14	0.33	-0.39	0.58	0.908	1.26	0.766	1.495	33.8	37.2	42.5	28.5	25.95	15.09	9.68	12.28	High	High	High	High	High	High	High	High	High	High	High	High	High	High	High	High	A6ZI44 [83-96]	A6ZI44 1xPhospho [S93(100)]	3.79	100	1	47.6	34.6	32.9
FALSE	High	[K].LDHELSLDRESEAGTGSSEHEDGEREGSPR.[T]	Q8BPN8	DmX-like protein 2 OS=Mus musculus GN=Dmxl2 PE=1 SV=3		0.53402	0.356446	0.837105	0.00927691	0.2	0.42	-0.2	0.82	1.151	1.339	0.872	1.768	11.8	10.2	15.8	8.9	25.5	15.88	23.4	13.82	High	High	High	High	High	High	High	High	High	High	High	High	High	High	High	High	Q8BPN8 [446-475]	Q8BPN8 2xPhospho [S451(100); S473(100)]	4.27	100	1	17.1	9.6	11.6
FALSE	High	[R].QSLGESPR.[T]	E9Q030	Actin-binding LIM protein 1 OS=Mus musculus GN=Ablim1 PE=1 SV=1		0.838134	0.16539	0.829914	0.0093172	-0.16	-0.24	0.01	-0.41	0.894	0.849	1.006	0.755	38.4	42.9	32.6	43.2	7.69	15.68	11.02	6.6	High	High	High	High	High	High	High	High	High	High	High	High	High	High	High	High	E9Q030 [149-156]	E9Q030 1xPhospho [S154(100)]	2.12	100	1	40.6	41.2	35.5
FALSE	High	[R].CNSEER.[G]	A0A087WS83	Voltage-dependent R-type calcium channel subunit alpha OS=Mus musculus GN=Cacna1e PE=1 SV=1		0.936846	0.218247	0.593582	0.00946082	-0.07	-0.37	0.3	-0.74	0.95	0.776	1.23	0.599	31.6	33.3	24.5	40.9	5.32	6.56	5.08	33.8	High	High	High	High	High	High	High	High	High	High	High	High	High	High	High	High	A0A087WS83 [2060-2065]	A0A087WS83 1xPhospho [S2062(100)]	1.93	100	1	31.2	32.1	29.6
FALSE	High	[K].TGNNQADTESPSHEK.[L]	A0A087WS40	Voltage-dependent L-type calcium channel subunit alpha OS=Mus musculus GN=Cacna1c PE=1 SV=1		0.725828	0.93713	0.156077	0.00965853	-0.12	-0.06	0.34	-0.52	0.919	0.962	1.27	0.696	27.5	29.9	26.4	38	8.09	15.49	10.97	10.9	High	High	High	High	High	High	High	High	High	High	High	High	High	High	High	High	A0A087WS40 [1747-1761]	A0A087WS40 1xPhospho [S1756(100)]	4.24	100	1	28.6	30.6	25.6
FALSE	High	[K].NSQPNRYTNR.[V]	Q99J95	Cyclin-dependent kinase 9 OS=Mus musculus GN=Cdk9 PE=1 SV=1		0.800301	0.704997	0.282536	0.0101138	0.4	0.39	-1.08	1.87	1.316	1.315	0.474	3.648	34.6	26.3	45.4	12.5	40.94	59	13.44	17.34	High	High	High	High	High	High	High	High	High	High	High	High	High	High	High	High	Q99J95 [179-188]	Q99J95 1xPhospho [T186(100)]	1.41	100	1	48.8	35	34.2
FALSE	High	[K].GSAESPDEGITTTEGEGECEQTPEELEPVEK.[Q]	P14873	Microtubule-associated protein 1B OS=Mus musculus GN=Map1b PE=1 SV=2		0.703324	0.0553062	0.228697	0.0105633	0.23	-0.44	0.22	-0.43	1.169	0.738	1.161	0.743	25.4	21.7	18.7	25.2	12.93	13.76	12.24	13.1	High	High	High	High	High	High	High	High	High	High	High	High	High	High	High	High	P14873 [884-914]	P14873 2xPhospho [S888(100); T905(100)]	6.64	100	1	20	26.3	24.5
FALSE	High	[R].TLKESDSAEGDETESPEQLVR.[E]	A2ALU3	DENN domain-containing protein 1A (Fragment) OS=Mus musculus GN=Dennd1a PE=1 SV=8		0.844784	0.239239	0.749213	0.0111211	-0.07	-0.2	0.1	-0.36	0.956	0.873	1.072	0.778	44.2	46.2	38.5	49.5	9.14	5.06	11.18	5.54	High	High	High	High	High	High	High	High	High	High	High	High	High	High	High	High	A2ALU3 [138-158]	A2ALU3 2xPhospho [S152(99.1); S/T]	3.17	100	1	45.7	48.3	42.7
FALSE	High	[K].KATGVSAEDADPR.[A]	Q4KMM3	Oxidation resistance protein 1 OS=Mus musculus GN=Oxr1 PE=1 SV=3		0.999996	0.983976	0.00584423	0.011241	-0.05	0.01	-0.35	0.31	0.966	1.005	0.784	1.24	30.8	31.9	31	25	12.93	8.28	4.96	9.88	High	High	High	High	High	High	High	High	High	High	High	High	High	High	High	High	Q4KMM3 [303-315]	Q4KMM3 1xPhospho [S308(100)]	1.9	100	1	37.6	29.7	28.2
FALSE	High	[R].TEEDSKSIKSDVPVYLK.[R]	Q6A065	Centrosomal protein of 170 kDa OS=Mus musculus GN=Cep170 PE=1 SV=2		0.943456	0.967287	0.065484	0.0112659	0.89	-0.38	-1.52	2.04	1.859	0.771	0.348	4.12	34.2	18.4	26.4	6.4	50.2	61.14	16.44	29.39	High	High	High	High	High	High	High	High	High	High	High	High	High	High	High	High	Q6A065 [349-365]	Q6A065 2xPhospho [S355(99.1); S358(100)]	4.46	100	1	35	33.6	34.8
FALSE	High	[K].DAEAGGSQSQTPGSTASSEPVSPVQEK.[L]	Q811P8	Rho GTPase-activating protein 32 OS=Mus musculus GN=Arhgap32 PE=1 SV=2		0.999577	0.140939	0.545733	0.0114448	-0.04	0.31	-0.17	0.44	0.974	1.243	0.89	1.361	20	20.6	24.9	18.3	16.26	12.04	11.16	6.06	High	High	High	High	High	High	High	High	High	High	High	High	High	High	High	High	Q811P8 [835-861]	Q811P8 3xPhospho [S851(96.1); S852(96.1); S856(100)]	3.66	100	1	17.7	25.2	21.5
FALSE	High	[R].RASVCAEAYNPDEEEDDAESR.[I]	P31324	cAMP-dependent protein kinase type II-beta regulatory subunit OS=Mus musculus GN=Prkar2b PE=1 SV=3		0.954999	0.409218	0.370277	0.0114953	0.16	0.22	-0.46	0.84	1.114	1.162	0.726	1.784	58.3	52.3	67.7	38	30.03	27.62	16.42	4.76	High	High	High	High	High	High	High	High	High	High	High	High	High	High	High	High	P31324 [110-130]	P31324 1xPhospho [S112(100)]	7.8	100	1	74.4	58.9	57.7
FALSE	High	[R].GGGGYGGSGDGYNGFGNDGGYGGGSPGYSGGSR.[G]	Q5EBP8	Heterogeneous nuclear ribonucleoprotein A1 OS=Mus musculus GN=Hnrnpa1 PE=1 SV=1		0.36608	0.220811	0.999963	0.0116277	0.45	0.42	-0.1	0.97	1.364	1.34	0.933	1.959	23.1	16.9	30.9	15.8	19.71	21.84	20.39	21.56	High	High	High	High	High	High	High	High	High	High	High	High	High	High	High	High	Q5EBP8 [233-265]	Q5EBP8 1xPhospho [S257(100)]	4.39	100	1	25.6	15.8	22.1
FALSE	High	[K].QGVDDIEKFEDEGAGFEESSETGDYEEK.[A]	P14873	Microtubule-associated protein 1B OS=Mus musculus GN=Map1b PE=1 SV=2		0.864038	0.36256	0.56692	0.0116279	-0.16	-0.23	0.18	-0.56	0.895	0.855	1.133	0.676	26.7	29.9	22.9	33.8	22.93	18.23	5.62	3.22	High	High	High	High	High	High	High	High	High	High	High	High	High	High	High	High	P14873 [915-942]	P14873 2xPhospho [S933(99.1); S934(99.1)]	4.57	100	1	34.8	29.9	20.7
FALSE	High	[R].NSLTQEVS.[-]	Q64735	Complement component receptor 1-like protein OS=Mus musculus GN=Cr1l PE=1 SV=1		0.934739	0.182626	0.745315	0.0120688	0.02	-0.44	0.24	-0.66	1.015	0.738	1.183	0.633	13.3	13.1	9.9	15.6	23.07	16.69	21.6	6.83	High	High	High	High	High	High	High	High	High	High	High	High	High	High	High	High	Q64735 [476-483]	Q64735 1xPhospho [S477(100)]	1.56	100	1	12.5	15.9	14.2
FALSE	High	[R].KAAVLSDSEDDAGNASAK.[K]	Q8C1D8	Protein IWS1 homolog OS=Mus musculus GN=Iws1 PE=1 SV=1		0.998397	0.166575	0.365067	0.0120706	0.07	0.53	-0.25	0.85	1.049	1.448	0.842	1.805	46.9	44.7	67.9	37.6	25.73	35.02	22.96	5.64	High	High	High	High	High	High	High	High	High	High	High	High	High	High	High	High	Q8C1D8 [338-355]	Q8C1D8 2xPhospho [S343(100); S345(100)]	3.05	100	1	40	37.3	64
FALSE	High	[K].EEQELHDIHSTRSKER.[L]	P35802	Neuronal membrane glycoprotein M6-a OS=Mus musculus GN=Gpm6a PE=1 SV=1		0.627938	0.294505	0.896119	0.0122228	0.05	0.57	-0.09	0.71	1.038	1.482	0.938	1.64	87.5	84.3	129.7	79.1	33.13	6.87	15.42	6.96	High	High	High	High	High	High	High	High	High	High	High	High	High	High	High	High	P35802 [258-273]		5.87	100	1	150.8	78.4	85.4
FALSE	High	[K].DLGVAK.[E]	Q2MHN3	Protein Zfhx2 OS=Mus musculus GN=Zfhx2 PE=1 SV=1		0.323519	0.13251	0.0362504	0.0127569	0.15	-0.21	0.43	-0.49	1.106	0.867	1.35	0.711	27	24.4	23.4	32.9	18.49	4.91	2.75	13.01	High	High	High	High	High	High	High	High	High	High	High	High	High	High	High	High	Q2MHN3 [88-93]		0.92	100	1	25.4	24.3	28.6
FALSE	High	[K].EADEEDSDEETSYPERSEQEEELESEPGVAK.[D]	D3Z316	Protein 1700021F05Rik OS=Mus musculus GN=1700021F05Rik PE=1 SV=1		0.999665	0.174264	0.000386462	0.0129181	-0.05	0.18	0.36	-0.24	0.969	1.129	1.288	0.849	23.9	24.7	27	31.8	5.28	9.34	7.68	4.17	High	High	High	High	High	High	High	High	High	High	High	High	High	High	High	High	D3Z316 [100-130]	D3Z316 1xPhospho [S106(100)]	6.39	100	1	24.2	25.7	23.7
FALSE	High	[R].GPPETGSPK.[A]	G5E8J2	Ankyrin 1, erythroid OS=Mus musculus GN=Ank1 PE=1 SV=1		0.929556	0.135584	0.261682	0.0135642	-0.02	-0.3	0.16	-0.48	0.984	0.813	1.119	0.716	17.3	17.5	14	19.6	6.95	13.39	12.96	13.84	High	High	High	High	High	High	High	High	High	High	High	High	High	High	High	High	G5E8J2 [1739-1747]	G5E8J2 1xPhospho [S1745(100)]	3.72	100	1	19.3	17.6	16.9
FALSE	High	[R].SKEQLNSYT.[-]	P35803	Neuronal membrane glycoprotein M6-b OS=Mus musculus GN=Gpm6b PE=1 SV=2		0.996304	0.910246	0.0298133	0.0136832	0.02	0	-0.22	0.25	1.016	1.001	0.856	1.188	114.2	112.4	114.3	96.2	5.5	10.17	7.14	5.22	High	High	High	High	High	High	High	High	High	High	High	High	High	High	High	High	P35803 [320-328]	P35803 1xPhospho [T328(100)]	2.76	100	1	118.4	117.1	111.3
FALSE	High	[K].TDDVSEKTSLADQEEVR.[T]	P70704	Phospholipid-transporting ATPase IA OS=Mus musculus GN=Atp8a1 PE=1 SV=2		0.999809	0.907745	0.0505495	0.013741	0.16	-0.23	0.85	-0.91	1.116	0.855	1.799	0.531	44.3	39.7	37.9	71.4	24.28	35.91	16.46	9.71	High	High	High	High	High	High	High	High	High	High	High	High	High	High	High	High	P70704 [21-37]	P70704 2xPhospho [S25(100); S29(99.4)]	4.63	100	1	34.1	54.3	36.5
FALSE	High	[K].TASTNSIAQAR.[R]	A0A0N4SW28	Guanine nucleotide-binding protein subunit gamma OS=Mus musculus GN=Gng12 PE=1 SV=1		0.999981	0.713601	0.0867644	0.0144807	-0.41	0.44	-1.37	1.39	0.751	1.352	0.388	2.619	13	17.4	17.6	6.7	41.45	45.82	15.47	26.11	High	High	High	High	High	High	High	High	High	High	High	High	High	High	High	High	A0A0N4SW28 [5-15]	A0A0N4SW28 1xPhospho [S10(99.6)]	2.23	100	1	22.3	12.4	13.7
FALSE	High	[R].SDSNQYIR.[E]	P97366	Ecotropic viral integration site 5 protein OS=Mus musculus GN=Evi5 PE=1 SV=2		0.984734	0.29416	0.489221	0.0147144	0.03	0.25	-0.17	0.45	1.024	1.187	0.887	1.371	21.5	21	25.5	18.6	11.46	7.98	17.09	2.64	High	High	High	High	High	High	High	High	High	High	High	High	High	High	High	High	P97366 [687-694]	P97366 1xPhospho [S689(100)]	1.64	100	1	20.9	24.8	18.8
FALSE	High	[R].KIAELEEERSQGSTSNSDWMK.[N]	P14873	Microtubule-associated protein 1B OS=Mus musculus GN=Map1b PE=1 SV=2		0.631847	0.999893	0.132269	0.0147998	0.29	0.02	-0.46	0.76	1.222	1.012	0.729	1.696	90.8	74.3	91.9	54.2	20.83	23.9	12.28	9.01	High	High	High	High	High	High	High	High	High	High	High	High	High	High	High	High	P14873 [327-347]	P14873 3xPhospho [S339(97.4); T340(97.4); S]	2.29	100	1	95.3	106.6	86.5
FALSE	High	[R].VAPEEHPVLLTEAPLNPK.[A]	P60710	Actin, cytoplasmic 1 OS=Mus musculus GN=Actb PE=1 SV=1		0.727439	0.261804	0.924912	0.016481	0.05	0.49	-0.14	0.69	1.037	1.404	0.905	1.609	51.9	50.1	72.9	45.3	27.56	7.03	14.97	8.39	High	High	High	High	High	High	High	High	High	High	High	High	High	High	High	High	P60710 [96-113]		3.89	100	1	79.9	46.3	46
FALSE	High	[R].DRSGSSQSTSR.[R]	Q8BTI8	Serine/arginine repetitive matrix protein 2 OS=Mus musculus GN=Srrm2 PE=1 SV=3		0.810304	0.657177	0.0102641	0.0166908	-0.11	0.21	0.82	-0.72	0.93	1.156	1.771	0.607	17.8	19.1	20.6	33.9	10.25	19.52	22.29	18.34	High	High	High	High	High	High	High	High	High	High	High	High	High	High	High	High	Q8BTI8 [1745-1755]	Q8BTI8 3xPhospho [S1747(100); S1749(100); S1750(100)]	3.88	100	1	16.4	19.3	16
FALSE	High	[K].SVPTVDSGNEDDDSSFK.[I]	Q05D44	Eukaryotic translation initiation factor 5B OS=Mus musculus GN=Eif5b PE=1 SV=2		0.99953	0.0187712	0.998556	0.0172247	0.07	-0.3	0.01	-0.25	1.051	0.811	1.01	0.844	36.1	34.3	29.2	34.7	7.76	5.13	3.62	9.78	High	High	High	High	High	High	High	High	High	High	High	High	High	High	High	High	Q05D44 [209-225]	Q05D44 1xPhospho [S215(100)]	3.93	100	1	37.1	31.1	35.8
FALSE	High	[R].EDSVEAR.[S]	P26339	Chromogranin-A OS=Mus musculus GN=Chga PE=1 SV=1		0.929072	0.0201903	0.902704	0.0176497	0.03	-0.4	0.04	-0.42	1.018	0.756	1.031	0.747	19.6	19.3	14.8	19.9	12.08	13.15	12.54	4.76	High	High	High	High	High	High	High	High	High	High	High	High	High	High	High	High	P26339 [412-418]	P26339 1xPhospho [S414(100)]	1.72	100	1	20.6	22.2	18.7
FALSE	High	[R].GSIILDSGHLSTASSSDDLKGEEGSFR.[G]	B2RRE2	Myo18a protein OS=Mus musculus GN=Myo18a PE=1 SV=1		0.994486	0.450912	0.335398	0.0184228	0.05	0.24	-0.37	0.66	1.038	1.18	0.776	1.578	14.3	13.8	16.9	10.7	29.29	7.23	21	13.3	High	High	High	High	High	High	High	High	High	High	High	High	High	High	High	High	B2RRE2 [88-114]		2.56	100	1	19.4	16.1	12.7
FALSE	High	[R].SASAPASPR.[E]	O35927	Catenin delta-2 OS=Mus musculus GN=Ctnnd2 PE=1 SV=1		0.584407	0.967686	0.0798111	0.0186434	-0.14	0.03	0.29	-0.4	0.907	1.025	1.222	0.76	85.7	94.5	87.8	115.4	7.68	12.48	10.66	5.21	High	High	High	High	High	High	High	High	High	High	High	High	High	High	High	High	O35927 [1092-1100]	O35927 1xPhospho [S1098(100)]	2.16	100	1	84.8	86.5	83.2
FALSE	High	[R].DSDTSISIPSVDHEELER.[S]	B7ZBV9; B7ZBW2	Potassium voltage-gated channel subfamily KQT member 2 OS=Mus musculus GN=Kcnq2 PE=1 SV=1 Potassium voltage-gated channel subfamily KQT member 2 OS=Mus musculus GN=Kcnq2 PE=1 SV=2	Shared	0.749999	0.671691	0.024053	0.0188712	0.16	-0.23	0.69	-0.75	1.12	0.856	1.609	0.596	7.9	7	6.7	11.3	9.67	15.42	9.55	27.57	High	High	High	High	High	High	High	High	High	High	High	High	High	High	High	High	B7ZBV9 [781-798]; B7ZBW2 [750-767]	B7ZBV9 3xPhospho [S787(98); S790(100); S/T]; B7ZBW2 3xPhospho [S756(98); S759(100); S/T]	1.32	100	2	8.5	6.8	7.5
FALSE	High	[R].SSSLESQGK.[L]	Q3TB04	FERM domain-containing protein 4A OS=Mus musculus GN=Frmd4a PE=1 SV=1		0.81612	0.263531	0.117334	0.0189863	0.17	-0.4	0.27	-0.5	1.127	0.756	1.209	0.705	20	17.7	15.1	21.4	15.8	16.32	9.82	16.19	High	High	High	High	High	High	High	High	High	High	High	High	High	High	High	High	Q3TB04 [400-408]		2.42	100	1	20.3	19.7	20.4
FALSE	High	[R].SISSDSSSSK.[K]	Q8BWS5	G protein-regulated inducer of neurite outgrowth 3 OS=Mus musculus GN=Gprin3 PE=1 SV=1		0.0641694	0.276153	0.095748	0.0196509	-0.44	0.3	0.39	-0.53	0.738	1.227	1.309	0.692	42.4	57.5	52	75.2	12.53	15.81	22.8	11.6	High	High	High	High	High	High	High	High	High	High	High	High	High	High	High	High	Q8BWS5 [721-730]	Q8BWS5 2xPhospho [S721(100); S724(99.5)]	2.25	100	1	37.5	43.1	41.7
FALSE	High	[R].SASESAGSSGTA.[-]	Q8BGH4	Receptor expression-enhancing protein 1 OS=Mus musculus GN=Reep1 PE=1 SV=1		0.733881	0.996717	0.170216	0.0208645	0.23	0.14	-0.41	0.79	1.176	1.104	0.752	1.727	60.9	51.8	67.3	39	13.84	37.68	4.14	26.52	High	High	High	High	High	High	High	High	High	High	High	High	High	High	High	High	Q8BGH4 [190-201]	Q8BGH4 1xPhospho [S192(100)]	3.48	100	1	61.1	60.5	78.8
FALSE	High	[R].SRPSSDLNNSTLQSPAHLK.[V]	Q8VHJ5	Serine/threonine-protein kinase MARK1 OS=Mus musculus GN=Mark1 PE=1 SV=2		0.87577	0.641517	0.455855	0.0211004	0.09	0.12	-0.22	0.43	1.064	1.089	0.857	1.351	30	28.2	32.6	24.2	8.26	11.6	16.28	13.4	High	High	High	High	High	High	High	High	High	High	High	High	High	High	High	High	Q8VHJ5 [390-408]	Q8VHJ5 2xPhospho [S403(97.8); S/T]	3.27	100	1	28.3	32.6	31.8
FALSE	High	[R].QPSEEEIIK.[L]	Q62048	Astrocytic phosphoprotein PEA-15 OS=Mus musculus GN=Pea15 PE=1 SV=1		0.64778	0.167024	0.128954	0.0211025	0.13	-0.26	0.17	-0.3	1.094	0.837	1.129	0.812	71.3	65.2	59.7	73.6	8.31	4.68	10.85	11.55	High	High	High	High	High	High	High	High	High	High	High	High	High	High	High	High	Q62048 [114-122]	Q62048 1xPhospho [S116(100)]	3.87	100	1	75.2	75.1	63.3
FALSE	High	[K].LASDSDAESDSR.[A]	A2AGQ2	MAP kinase-activating death domain protein OS=Mus musculus GN=Madd PE=1 SV=1		0.999889	0.622313	0.187823	0.0212195	0.03	-0.1	0.43	-0.5	1.018	0.936	1.35	0.706	22.9	22.5	21.4	30.4	14.41	18.25	22.51	8.76	High	High	High	High	High	High	High	High	High	High	High	High	High	High	High	High	A2AGQ2 [796-807]	A2AGQ2 1xPhospho [S800(100)]	3.63	100	1	23.8	18.8	22.1
FALSE	High	[K].GSLPPAALESSDSTNTTIEDEDAKAR.[K]	Q5SVJ1	Calcium/calmodulin-dependent protein kinase type II subunit beta OS=Mus musculus GN=Camk2b PE=1 SV=1		0.924464	0.191972	0.899175	0.0212546	0.11	0.12	-0.1	0.33	1.08	1.086	0.935	1.255	39	36.1	42.3	33.7	10.09	7.46	7.59	11.07	High	High	High	High	High	High	High	High	High	High	High	High	High	High	High	High	Q5SVJ1 [346-371]	Q5SVJ1 3xPhospho [T359(97.1); T361(99.9); T362(100)]	4.22	100	1	38.3	39.7	40.1
FALSE	High	[K].VAELEEEQSQGSSSYSDWVK.[N]	A2ARP8	Microtubule-associated protein 1A OS=Mus musculus GN=Map1a PE=1 SV=1		0.955404	0.570817	0.399394	0.0214315	0.32	0.18	-0.27	0.76	1.249	1.129	0.831	1.698	81.7	65.4	92.2	54.3	23.11	21.49	15.55	5.17	High	High	High	High	High	High	High	High	High	High	High	High	High	High	High	High	A2ARP8 [344-363]	A2ARP8 2xPhospho [S352(100); S355(100)]	6.5	100	1	82.1	83.7	81.3
FALSE	High	[K].LKEDSEAESTESVPLVCK.[S]	Q8C419	Probable G-protein coupled receptor 158 OS=Mus musculus GN=Gpr158 PE=1 SV=2		0.259235	0.964508	0.258065	0.0221985	0.36	-0.1	-0.44	0.71	1.286	0.936	0.738	1.631	17.6	13.7	16.5	10.1	21.42	22.18	8.76	19.32	High	High	High	High	High	High	High	High	High	High	High	High	High	High	High	High	Q8C419 [861-878]	Q8C419 3xPhospho [S865(100); S869(99.5); S872(99.5)]	4.69	100	1	18.8	16.6	21.5
FALSE	High	[K].KEESEESEDDMGFGLFD.[-]	E9Q3T0	Protein Gm10073 OS=Mus musculus GN=Gm10073 PE=1 SV=1		0.621191	0.988806	0.294054	0.0234319	-0.24	0	0.3	-0.55	0.847	0.999	1.235	0.685	42.3	49.9	42.2	61.6	12.39	12.62	14.95	29.16	High	High	High	High	High	High	High	High	High	High	High	High	High	High	High	High	E9Q3T0 [98-114]	E9Q3T0 1xPhospho [S101(100)]	3.62	100	1	36.9	49.6	43.4
FALSE	High	[R].AQTTARVSPPESPR.[A]	E9PWP6	Regulating synaptic membrane exocytosis protein 1 (Fragment) OS=Mus musculus GN=Rims1 PE=1 SV=3		0.369016	0.43507	0.998787	0.0235904	-0.16	-0.2	-0.04	-0.32	0.898	0.87	0.976	0.8	69.8	77.8	60.7	75.9	11.03	9.3	9.17	12.77	High	High	High	High	High	High	High	High	High	High	High	High	High	High	High	High	E9PWP6 [436-449]	E9PWP6 2xPhospho [S443(98.8); S447(100)]	2.05	100	1	77.9	68.4	71.2
FALSE	High	[K].KEESEESDDDMGFGLFD.[-]	P99027	60S acidic ribosomal protein P2 OS=Mus musculus GN=Rplp2 PE=1 SV=3		0.65565	0.934409	0.0650963	0.0236078	-0.2	0.08	0.74	-0.86	0.872	1.059	1.671	0.553	23.4	26.8	24.8	44.8	6.1	31.47	5.87	35.14	High	High	High	High	High	High	High	High	High	High	High	High	High	High	High	High	P99027 [99-115]	P99027 1xPhospho [S105(100)]	3.36	100	1	23.8	24	21
FALSE	High	[K].GDMSDEDDENEFFDAPEIITMPENLGHK.[R]	Q3B7Z2	Oxysterol-binding protein 1 OS=Mus musculus GN=Osbp PE=1 SV=3		0.323382	0.747142	0.937403	0.0245474	-0.37	-0.13	0.05	-0.54	0.775	0.915	1.034	0.687	7.1	9.2	6.5	9.5	22.25	22.15	18.42	22.79	High	High	High	High	High	High	High	High	High	High	High	High	High	High	High	High	Q3B7Z2 [346-373]	Q3B7Z2 1xPhospho [S349(100)]	4.84	100	1	5.8	9.4	6.3
FALSE	High	[R].VFDKDGNGYISAAELR.[H]	P62204	Calmodulin OS=Mus musculus GN=Calm1 PE=1 SV=2		0.506201	0.981625	0.431819	0.0249721	-0.09	-0.03	0.1	-0.22	0.943	0.982	1.075	0.861	64.4	68.3	63.2	73.4	5.51	8.03	6.91	7.72	High	High	High	High	High	High	High	High	High	High	High	High	High	High	High	High	P62204 [92-107]		1.7	100	1	65.3	69.7	61.2
FALSE	High	[K].DKKESTDESEVDK.[T]	A0A0G2JDT9	Leucine-rich repeat-containing protein 7 OS=Mus musculus GN=Lrrc7 PE=1 SV=1		0.0952373	0.836788	0.409017	0.025076	-0.72	0.41	0.37	-0.68	0.606	1.333	1.295	0.624	17.8	29.4	23.7	38	33.63	2.67	30.09	17.68	High	High	High	High	High	High	High	High	High	High	High	High	High	High	High	High	A0A0G2JDT9 [667-679]	A0A0G2JDT9 2xPhospho [S671(98.8); T672(98.8)]	1.96	100	1	13.3	28.3	19.7
FALSE	High	[K].SKEEQELHDIHSTRSKER.[L]	P35802	Neuronal membrane glycoprotein M6-a OS=Mus musculus GN=Gpm6a PE=1 SV=1		0.921423	0.641278	0.450307	0.0256018	0.11	0.44	-0.47	1.02	1.08	1.357	0.721	2.031	89.6	83	121.5	59.8	33.55	24.05	24.21	18.36	High	High	High	High	High	High	High	High	High	High	High	High	High	High	High	High	P35802 [256-273]	P35802 2xPhospho [S267(99.2); S270(100)]	5.31	100	1	135.9	85.6	93.8
FALSE	High	[R].LLRDPDGSAEDDSLEQTSLMESSGK.[S]	Q8C8R3	Ankyrin-2 OS=Mus musculus GN=Ank2 PE=1 SV=2		0.0682129	0.998943	0.97487	0.0260381	0.39	0.03	-0.03	0.45	1.308	1.022	0.978	1.368	27.9	21.3	28.5	20.8	11.05	17.36	7.8	11.78	High	High	High	High	High	High	High	High	High	High	High	High	High	High	High	High	Q8C8R3 [2468-2492]	Q8C8R3 1xPhospho [S2475(100)]	3.36	100	1	27.9	32.7	27.8
FALSE	High	[R].KVAELEEEQSQGSSSYSDWVK.[N]	A2ARP8	Microtubule-associated protein 1A OS=Mus musculus GN=Map1a PE=1 SV=1		0.984165	0.754544	0.243803	0.0261319	-0.03	0.3	-0.43	0.69	0.98	1.227	0.743	1.618	50.9	52	62.5	38.6	16.7	19.38	24.95	5.4	High	High	High	High	High	High	High	High	High	High	High	High	High	High	High	High	A2ARP8 [343-363]	A2ARP8 1xPhospho [S355(99.6)]	4.94	100	1	65.7	52.5	49.4
FALSE	High	[R].SVSTSPSILPAYLK.[E]	Q8BWS5	G protein-regulated inducer of neurite outgrowth 3 OS=Mus musculus GN=Gprin3 PE=1 SV=1		0.819486	0.951571	0.262625	0.0263602	-0.36	0.07	0.31	-0.6	0.781	1.05	1.243	0.66	15.5	19.9	16.3	24.7	21.73	27.96	13.12	9.97	High	High	High	High	High	High	High	High	High	High	High	High	High	High	High	High	Q8BWS5 [323-336]	Q8BWS5 1xPhospho [S327(99.1)]	3.13	100	1	14	21.9	16.9
FALSE	High	[K].AEEDEILNRSPR.[N]	P35564	Calnexin OS=Mus musculus GN=Canx PE=1 SV=1		0.968656	0.217155	0.845723	0.0264057	-0.01	-0.28	0.07	-0.36	0.992	0.825	1.05	0.779	78.6	79.3	64.9	83.2	7.66	10.2	13.3	16.48	High	High	High	High	High	High	High	High	High	High	High	High	High	High	High	High	P35564 [573-584]	P35564 1xPhospho [S582(100)]	3.99	100	1	81.5	84.7	75.8
FALSE	High	[R].ERSPALK.[S]	Q569Z6	Thyroid hormone receptor-associated protein 3 OS=Mus musculus GN=Thrap3 PE=1 SV=1		0.662537	0.146444	0.188045	0.0265202	0.31	-0.46	0.42	-0.57	1.239	0.726	1.335	0.673	16	12.9	11.6	17.3	17.41	7.1	22.82	12.06	High	High	High	High	High	High	High	High	High	High	High	High	High	High	High	High	Q569Z6 [246-252]	Q569Z6 1xPhospho [S248(100)]	1.46	100	1	17	16	16
FALSE	High	[K].AGEASAESTGAADGAAPEEGEAK.[K]	Q91XV3	Brain acid soluble protein 1 OS=Mus musculus GN=Basp1 PE=1 SV=3		0.220183	0.855234	0.962976	0.0265327	0.13	0	-0.01	0.13	1.091	0.999	0.996	1.095	65	59.6	65	59.4	3.66	4.34	10.77	5.06	High	High	High	High	High	High	High	High	High	High	High	High	High	High	High	High	Q91XV3 [124-146]	Q91XV3 1xPhospho [S128(100)]	7.97	100	1	62.8	64.7	68.6
FALSE	High	[K].EVENEQTPVSEPEEEKGSQPGPPVER.[Q]	O70318	Band 4.1-like protein 2 OS=Mus musculus GN=Epb41l2 PE=1 SV=2		0.976077	0.104854	0.980105	0.0270616	0.05	0.37	-0.1	0.52	1.033	1.293	0.933	1.432	9.9	9.6	12.8	8.9	11.93	28.04	11.74	8.75	High	High	High	High	High	High	High	High	High	High	High	High	High	High	High	High	O70318 [29-54]	O70318 1xPhospho [S38(100)]	2.33	100	1	8.7	9.3	11.4
FALSE	High	[R].MHDSHLSSDEPKHR.[N]	P43006	Excitatory amino acid transporter 2 OS=Mus musculus GN=Slc1a2 PE=1 SV=1		0.996746	0.0814082	0.833129	0.0271076	0.03	0.41	-0.12	0.55	1.022	1.325	0.923	1.467	65.1	63.7	86.3	58.8	10.5	20.36	3.25	19.34	High	High	High	High	High	High	High	High	High	High	High	High	High	High	High	High	P43006 [18-31]	P43006 2xPhospho [S21(100); S24(99.5)]	5.78	100	1	59.4	64.4	65.8
FALSE	High	[R].HKLTLSDGESGEEKPTKPK.[E]	Q61687	Transcriptional regulator ATRX OS=Mus musculus GN=Atrx PE=1 SV=3		0.999864	0.176152	0.733358	0.027442	-0.04	-0.13	0.09	-0.26	0.973	0.911	1.062	0.834	18.3	18.8	16.6	19.9	7.79	7.18	15.07	8.52	High	High	High	High	High	High	High	High	High	High	High	High	High	High	High	High	Q61687 [1330-1348]	Q61687 2xPhospho [S1335(99); S1339(99)]	3.89	100	1	17.5	20.5	17.4
FALSE	High	[K].EMGTPLADTPTRPVTR.[H]	Q9EQF6	Dihydropyrimidinase-related protein 5 OS=Mus musculus GN=Dpysl5 PE=1 SV=1		0.999968	0.0161025	0.992527	0.0280485	0	-0.4	0.01	-0.4	1.002	0.757	1.004	0.756	50.2	50.1	38	50.3	7.56	13.15	15.78	8.26	High	High	High	High	High	High	High	High	High	High	High	High	High	High	High	High	Q9EQF6 [506-521]	Q9EQF6 2xPhospho [T509(100); T514(100)]	2.09	100	1	46.4	50.9	55.6
FALSE	High	[K].IAELEEERSQGSTSNSDWMK.[N]	P14873	Microtubule-associated protein 1B OS=Mus musculus GN=Map1b PE=1 SV=2		0.909776	0.983132	0.157826	0.0281033	0.25	0.04	-0.55	0.83	1.186	1.025	0.682	1.782	88.4	74.5	90.6	50.9	24.83	26.13	15.95	9.43	High	High	High	High	High	High	High	High	High	High	High	High	High	High	High	High	P14873 [328-347]	P14873 2xPhospho [S336(100); S339(98.9)]	5.96	100	1	98.7	84.6	92.3
FALSE	High	[R].IIADDLMKQGDEESENSVKR.[H]	P51830	Adenylate cyclase type 9 OS=Mus musculus GN=Adcy9 PE=1 SV=1		0.979267	0.649563	0.110051	0.0283431	-0.04	0.17	-0.32	0.45	0.974	1.127	0.801	1.37	87.5	89.9	98.6	71.9	3.53	14.43	18.24	10.13	High	High	High	High	High	High	High	High	High	High	High	High	High	High	High	High	P51830 [341-360]	P51830 2xPhospho [S354(100); S357(100)]	5.37	100	1	84.7	85	90.2
FALSE	High	[K].TLEVVSPSQSVTGSAGHTPYYQSPTDEK.[S]	P14873	Microtubule-associated protein 1B OS=Mus musculus GN=Map1b PE=1 SV=2		0.2027	0.985407	0.457347	0.0285196	0.34	0.06	-0.36	0.76	1.266	1.044	0.778	1.698	53.4	42.2	55.7	32.8	24.67	21.23	26.22	6.39	High	High	High	High	High	High	High	High	High	High	High	High	High	High	High	High	P14873 [1312-1339]	P14873 3xPhospho [S1317(100); S1325(97.2); S1334(100)]	6.55	100	1	78.1	53.3	53.5
FALSE	High	[K].AGQENISVSK.[R]	D3YYN7	Sodium/potassium-transporting ATPase subunit alpha OS=Mus musculus GN=Atp1a2 PE=1 SV=1		0.84399	0.816908	0.0320168	0.0290078	-0.63	0.32	-1.46	1.15	0.644	1.247	0.362	2.217	21	32.6	26.2	11.8	49.02	33.32	29.54	40.88	High	High	High	High	High	High	High	High	High	High	High	High	High	High	High	High	D3YYN7 [433-442]	D3YYN7 1xPhospho [S439(100)]	3.43	100	1	37.3	17.4	25.4
FALSE	High	[R].MGPSSSPIPSPSPSPTDSK.[R]	P63318	Protein kinase C gamma type OS=Mus musculus GN=Prkcg PE=1 SV=1		0.990428	0.829075	0.201595	0.0296893	0.01	0.13	-0.23	0.37	1.004	1.095	0.85	1.293	97	96.6	106.2	82.1	16.46	4.9	7.11	8.2	High	High	High	High	High	High	High	High	High	High	High	High	High	High	High	High	P63318 [317-335]	P63318 3xPhospho [S326(100); S328(100); S330(100)]	4.64	100	1	82	97.3	96.6
FALSE	High	[R].GLLHGWSQSSTEEVPRDVVPTR.[I]	Q3UTJ2	Sorbin and SH3 domain-containing protein 2 OS=Mus musculus GN=Sorbs2 PE=1 SV=2		0.999826	0.908234	0.00832861	0.0304869	0.05	-0.12	-0.7	0.62	1.035	0.917	0.616	1.541	10.7	10.4	9.8	6.4	12.04	32.3	16.81	10.88	High	High	High	High	High	High	High	High	High	High	High	High	High	High	High	High	Q3UTJ2 [568-589]	Q3UTJ2 2xPhospho [S574(100); S/T]	4.45	100	1	9.9	11.6	12.3
FALSE	High	[R].TDTAADGETSATESDQEEDAEIK.[A]	Q9WV92	Band 4.1-like protein 3 OS=Mus musculus GN=Epb41l3 PE=1 SV=1		0.536116	0.999964	0.271515	0.0307558	-0.14	-0.13	0.24	-0.51	0.905	0.915	1.182	0.701	24.2	26.7	22.1	31.6	8.96	9.09	16.66	13.03	High	High	High	High	High	High	High	High	High	High	High	High	High	High	High	High	Q9WV92 [534-556]	Q9WV92 1xPhospho [S547(99.5)]	4.12	100	1	20.6	25.1	23.5
FALSE	High	[R].TDTAADGETSATESDQEEDAEIK.[A]	Q9WV92	Band 4.1-like protein 3 OS=Mus musculus GN=Epb41l3 PE=1 SV=1		0.949467	0.540554	0.554365	0.0309196	-0.03	-0.18	0.12	-0.33	0.977	0.883	1.088	0.793	84.8	86.7	74.9	94.4	20.17	10.05	6.39	11.47	High	High	High	High	High	High	High	High	High	High	High	High	High	High	High	High	Q9WV92 [534-556]	Q9WV92 3xPhospho [S543(99.5); T545(99.5); T/S]	2.59	100	1	87.8	105.3	81.9
FALSE	High	[R].QASFQER.[S]	H7BX09	Glutamate receptor-interacting protein 1 OS=Mus musculus GN=Grip1 PE=1 SV=1		0.979181	0.983932	0.112153	0.0315441	-0.11	0.12	-0.88	0.9	0.925	1.09	0.542	1.86	28.4	30.8	31	16.7	13.83	34.84	22.39	24.7	High	High	High	High	High	High	High	High	High	High	High	High	High	High	High	High	H7BX09 [884-890]	H7BX09 1xPhospho [S886(100)]	1.62	100	1	28	28.9	35.3
FALSE	High	[R].SQSEYCNVGTK.[T]	Q6VNB8	WD repeat and FYVE domain-containing protein 3 OS=Mus musculus GN=Wdfy3 PE=1 SV=1		0.910361	1	0.0979453	0.031591	0.12	0.04	-0.58	0.73	1.083	1.027	0.668	1.664	20.1	18.5	20.6	12.4	17.05	22.1	25.53	21.58	High	High	High	High	High	High	High	High	High	High	High	High	High	High	High	High	Q6VNB8 [1940-1950]	Q6VNB8 1xPhospho [S1942(100)]	2.29	100	1	25.7	19	17.5
FALSE	High	[R].LVREDENDASDDEDDDEKRR.[I]	P58501	PAX3- and PAX7-binding protein 1 OS=Mus musculus GN=Paxbp1 PE=1 SV=3		0.999809	0.757206	0.190594	0.0318972	-0.04	0.12	-0.28	0.36	0.972	1.086	0.824	1.282	21.6	22.3	23.5	18.3	11.05	2.55	18.58	14.63	High	High	High	High	High	High	High	High	High	High	High	High	High	High	High	High	P58501 [255-274]	P58501 1xPhospho [S264(100)]	3.78	100	1	26.2	20.7	21.9
FALSE	High	[R].RDSCGGGAFETQENWER.[L]	Q6GQT6	Sterol regulatory element-binding protein cleavage-activating protein OS=Mus musculus GN=Scap PE=1 SV=1		0.941189	0.644918	0.481657	0.0320402	-0.12	-0.14	0.17	-0.43	0.917	0.908	1.125	0.74	12.5	13.6	11.3	15.3	13.41	15.51	9.06	10.07	High	High	High	High	High	High	High	High	High	High	High	High	High	High	High	High	Q6GQT6 [819-835]	Q6GQT6 1xPhospho [S821(100)]	0.96	100	1	14.8	10.7	12.2
FALSE	High	[K].EKPAGSPIR.[S]	A2AGQ2	MAP kinase-activating death domain protein OS=Mus musculus GN=Madd PE=1 SV=1		0.705151	0.947508	0.416586	0.03231	-0.08	-0.11	0.18	-0.37	0.943	0.93	1.131	0.775	32.3	34.2	30	38.7	10.46	10.6	11.85	7.22	High	High	High	High	High	High	High	High	High	High	High	High	High	High	High	High	A2AGQ2 [1205-1213]	A2AGQ2 1xPhospho [S1210(100)]	1.26	100	1	32.6	35	31.9
FALSE	High	[K].SPAEAKSPATVKSPGEAK.[S]	P19246	Neurofilament heavy polypeptide OS=Mus musculus GN=Nefh PE=1 SV=3		0.311967	0.293479	0.0352449	0.0326259	-0.31	0.3	-0.45	0.44	0.807	1.229	0.733	1.354	16.2	20.1	19.9	14.7	19.52	12.82	5.47	12.83	High	High	High	High	High	High	High	High	High	High	High	High	High	High	High	High	P19246 [631-648]	P19246 2xPhospho [S637(98.4); T/S]	1.79	100	1	16.5	13.7	21.5
FALSE	High	[K].TQSIYDDKNHRESNSNQCVYAAHNSVVIDECK.[VS]	P43006	Excitatory amino acid transporter 2 OS=Mus musculus GN=Slc1a2 PE=1 SV=1		0.53044	0.554262	0.884772	0.0329274	0.28	0.86	-0.41	1.55	1.214	1.813	0.753	2.921	8.3	6.8	15	5.1	41.14	29.66	35.03	16.7	High	High	High	High	High	High	High	High	High	High	High	High	High	Not Found	High	High	P43006 [518-549]		3.66	94	1	14.7	7.5	9.2
FALSE	High	[K].TPEDISTPPEGTKPCLQTPVTSER.[G]	Q8C8R3	Ankyrin-2 OS=Mus musculus GN=Ank2 PE=1 SV=2		0.156291	0.0800513	0.0679854	0.0335623	-0.17	0.28	-0.21	0.32	0.89	1.212	0.862	1.251	12.9	14.5	15.6	12.5	3.97	14.1	9.29	7.4	High	High	High	High	High	High	High	High	High	High	High	High	High	High	High	High	Q8C8R3 [3739-3762]	Q8C8R3 2xPhospho [T3745(100); T3750(100)]	4.12	100	1	12.6	13.6	12.5
FALSE	High	[K].RLSLESEGANEGATAAPELSALEEAFRR.[F]	Q7TQD2	Tubulin polymerization-promoting protein OS=Mus musculus GN=Tppp PE=1 SV=1		0.999123	0.93344	0.115387	0.0337684	0.02	0.12	-0.68	0.81	1.011	1.084	0.625	1.753	42	41.6	45.5	26	17.35	37.78	33.35	23.36	High	High	High	High	High	High	High	High	High	High	High	High	High	High	High	High	Q7TQD2 [29-56]	Q7TQD2 2xPhospho [S31(100); S34(100)]	4.23	100	1	50.8	37.7	46.8
FALSE	High	[R].ELGYPQEDDEEDEDEEEDEEEDSQAEVLK.[G]	Q60829	Protein phosphatase 1 regulatory subunit 1B OS=Mus musculus GN=Ppp1r1b PE=1 SV=2		0.742592	0.479933	0.0745455	0.0337997	-0.19	0.46	-0.45	0.72	0.879	1.373	0.733	1.647	51.3	58.4	70.4	42.8	10.7	10.25	20.72	21.88	High	High	High	High	High	High	High	High	High	High	High	High	High	High	High	High	Q60829 [108-136]	Q60829 1xPhospho [S130(100)]	4.66	100	1	51.7	47.4	60.6
FALSE	High	[R].SAPASPTHPGLMSPR.[S]	P42128	Forkhead box protein K1 OS=Mus musculus GN=Foxk1 PE=1 SV=2		0.994173	0.283709	0.721373	0.0338753	-0.04	-0.26	0.18	-0.48	0.974	0.834	1.136	0.716	24.2	24.8	20.2	28.2	9.08	16.49	9.27	11.75	High	High	High	High	High	High	High	High	High	High	High	High	High	High	High	High	P42128 [402-416]	P42128 2xPhospho [S406(100); S414(100)]	3.89	100	1	26.5	25.5	21.8
FALSE	High	[K].KYSDVEVPASVTGHSFASDGDSGTCSPLR.[H]	Q9QYC0; F8WGR0	Alpha-adducin OS=Mus musculus GN=Add1 PE=1 SV=2 Alpha-adducin OS=Mus musculus GN=Add1 PE=1 SV=1	Shared	0.332485	0.910265	0.87151	0.034141	0.19	0.3	-0.07	0.55	1.137	1.231	0.956	1.465	105.4	92.7	129.8	88.6	14.45	5.27	19.26	11.46	High	High	High	High	High	High	High	High	High	High	High	High	High	High	High	High	Q9QYC0 [406-434]; F8WGR0 [406-434]	Q9QYC0 2xPhospho [S431(99.5); S/T/Y]; F8WGR0 2xPhospho [S431(99.5); S/T/Y]	6.79	100	2	137.1	103.5	107.4
FALSE	High	[K].IAELEEERSQGSTSNSDWMK.[N]	P14873	Microtubule-associated protein 1B OS=Mus musculus GN=Map1b PE=1 SV=2		0.802657	0.744881	0.602504	0.0346729	0.16	0.06	-0.18	0.4	1.114	1.044	0.88	1.323	40.3	36.2	42.1	31.8	7.64	21.43	17.3	5.74	High	High	High	High	High	High	High	High	High	High	High	High	High	High	High	High	P14873 [328-347]	P14873 1xPhospho [S336(100)]	5.23	100	1	42.9	40.2	35.6
FALSE	High	[K].TLEVVSPSQSVTGSAGHTPYYQSPTDEK.[S]	P14873	Microtubule-associated protein 1B OS=Mus musculus GN=Map1b PE=1 SV=2		0.949579	0.283275	0.871497	0.03478	-0.09	0.65	-0.16	0.71	0.937	1.568	0.897	1.637	10.7	11.4	16.8	10.3	47.3	15.97	12.37	14.23	High	High	High	High	High	High	High	High	High	High	High	High	High	High	High	High	P14873 [1312-1339]	P14873 1xPhospho [S1334(100)]	5.22	100	1	22.6	10.2	11.3
FALSE	High	[K].EEQELQDIQSR.[S]	P35803	Neuronal membrane glycoprotein M6-b OS=Mus musculus GN=Gpm6b PE=1 SV=2		0.998242	0.869413	0.098021	0.0353835	-0.03	0.05	-0.41	0.44	0.983	1.034	0.751	1.354	40.5	41.2	41.9	30.9	12.85	17.73	15.67	5.97	High	High	High	High	High	High	High	High	High	High	High	High	High	High	High	High	P35803 [309-319]	P35803 1xPhospho [S318(100)]	4.33	100	1	43.2	38	43.7
FALSE	High	[K].EKRESVVSGDDR.[A]	P14873	Microtubule-associated protein 1B OS=Mus musculus GN=Map1b PE=1 SV=2		0.511334	0.928955	0.00854013	0.0356051	-0.22	-0.01	-0.67	0.45	0.859	0.995	0.627	1.364	13.5	15.7	13.4	9.8	16.15	14.18	12.97	8.46	High	High	High	High	High	High	High	High	High	High	High	High	High	High	High	High	P14873 [985-996]	P14873 2xPhospho [S989(100); S992(100)]	1.89	100	1	13.2	14.7	9.9
FALSE	High	[K].TESVTSGPLSPEGSPSKSPSK.[K]	Q9QYB8	Beta-adducin OS=Mus musculus GN=Add2 PE=1 SV=4		0.988487	0.967214	0.0454601	0.0356767	0.01	-0.01	0.26	-0.26	1.006	0.99	1.195	0.833	40	39.8	39.6	47.5	5.56	5.63	15.3	7.56	High	High	High	High	High	High	High	High	High	High	High	High	High	High	High	High	Q9QYB8 [683-703]	Q9QYB8 2xPhospho [S696(100); S/T]	6.47	100	1	44.2	39.2	39.8
FALSE	High	[R].RGSRDVAGPQSESDLEESGPAAEWSGDGSGSLR.[R]	D3YXZ3	Kinesin light chain 2 OS=Mus musculus GN=Klc2 PE=1 SV=1		0.751292	0.601045	0.806371	0.0356848	0.2	0.26	-0.08	0.53	1.148	1.195	0.947	1.448	13.7	11.9	16.4	11.3	10.36	11.13	15.75	14.01	High	High	High	High	High	High	High	High	High	High	High	High	High	High	High	High	D3YXZ3 [504-536]	D3YXZ3 1xPhospho [S506(98.5)]	1.53	100	1	12.1	14.7	15
FALSE	High	[K].QSSSPYEDKDKK.[E]	Q8BTI8	Serine/arginine repetitive matrix protein 2 OS=Mus musculus GN=Srrm2 PE=1 SV=3		0.886109	0.704575	0.0190048	0.035845	-0.02	0.1	0.36	-0.29	0.983	1.069	1.28	0.82	27.8	28.3	29.8	36.3	11.22	7.09	13.29	5.55	High	High	High	High	High	High	High	High	High	High	High	High	High	High	High	High	Q8BTI8 [330-341]	Q8BTI8 1xPhospho [S333(99.4)]	1.27	100	1	27.5	28.2	23
FALSE	High	[K].NNPEPWNK.[L]	Q62425	Cytochrome c oxidase subunit NDUFA4 OS=Mus musculus GN=Ndufa4 PE=1 SV=2		0.883709	0.134277	0.465659	0.0362735	0.13	-0.33	0.36	-0.56	1.092	0.793	1.28	0.677	9.5	8.7	7.5	11.1	22.34	17.73	14.13	18	High	High	High	High	High	High	High	High	High	High	High	High	High	High	High	High	Q62425 [49-56]		2.11	100	1	9.3	7.9	9.7
FALSE	High	[R].VDIITEEMPENALPSDEDDKDPNDPYR.[A]	O54774	AP-3 complex subunit delta-1 OS=Mus musculus GN=Ap3d1 PE=1 SV=1		0.992083	0.20443	0.568817	0.0363814	0.01	-0.41	0.3	-0.7	1.008	0.752	1.235	0.614	8.7	8.6	6.5	10.6	27.94	8.2	23.26	18.1	High	High	High	High	High	High	High	High	High	High	High	High	High	High	High	High	O54774 [770-796]	O54774 1xPhospho [S784(100)]	4.33	100	1	9.3	6.7	12.7
FALSE	High	[K].TSFDENDSEELEDKDSK.[S]	Q05D44	Eukaryotic translation initiation factor 5B OS=Mus musculus GN=Eif5b PE=1 SV=2		0.92249	0.646093	0.556252	0.0364219	0.01	-0.3	0.23	-0.52	1.009	0.814	1.176	0.698	22	21.8	17.9	25.6	18.93	17.18	11.43	14.31	High	High	High	High	High	High	High	High	High	High	High	High	High	High	High	High	Q05D44 [107-123]	Q05D44 2xPhospho [S108(99); S114(100)]	1.64	100	1	20.5	26	23.6
FALSE	High	[K].AEAKEESEESDEDMGFGLFD.[-]	P14869	60S acidic ribosomal protein P0 OS=Mus musculus GN=Rplp0 PE=1 SV=3		0.996325	0.969269	0.054627	0.03661	-0.02	-0.03	0.46	-0.51	0.986	0.979	1.377	0.701	43.6	44.3	42.7	61	13.71	22.51	8.99	19	High	High	High	High	High	High	High	High	High	High	High	High	High	High	High	High	P14869 [298-317]	P14869 1xPhospho [S304(100)]	3	100	1	45.6	41.7	39.6
FALSE	High	[R].LSPAKSPSLSPSPPSPIEK.[T]	P14873	Microtubule-associated protein 1B OS=Mus musculus GN=Map1b PE=1 SV=2		0.699563	0.196719	0.999698	0.0372995	-0.13	-0.46	-0.02	-0.56	0.915	0.729	0.987	0.676	12.9	14.1	9.4	13.9	22.52	10.51	23.7	3.43	High	High	High	High	High	High	High	High	High	High	High	High	High	High	High	High	P14873 [1246-1264]	P14873 2xPhospho [S1251(99.4); S1260(100)]	2.75	100	1	9	15.1	11.5
FALSE	High	[R].VEQALSEVASSLQSSAPK.[Q]	E9Q6P5	Tetratricopeptide repeat protein 7B OS=Mus musculus GN=Ttc7b PE=1 SV=1		0.999984	0.882992	0.146655	0.0373387	0.23	0.03	-1.16	1.42	1.175	1.023	0.448	2.685	11.6	9.8	11.8	4.4	39.29	38.75	33.61	19.94	High	High	High	High	High	High	High	High	High	High	High	High	High	Not Found	High	High	E9Q6P5 [668-685]	E9Q6P5 2xPhospho [S677(100); S678(100)]	4.36	88	1	12	11.1	12.4
FALSE	High	[K].ASSEEEDHSR.[V]	A0A087WNU5	Ankyrin-3 (Fragment) OS=Mus musculus GN=Ank3 PE=1 SV=1		0.756801	0.374421	0.966301	0.0376284	-0.13	-0.26	0.09	-0.48	0.916	0.833	1.061	0.719	15.4	16.8	12.8	17.8	14.35	7.47	8.16	22.21	High	High	High	High	High	High	High	High	High	High	High	High	High	High	High	High	A0A087WNU5 [931-940]		2.88	100	1	16.5	14.4	18.7
FALSE	High	[R].SRSPSPESR.[S]	Q9Z0U1	Tight junction protein ZO-2 OS=Mus musculus GN=Tjp2 PE=1 SV=2		0.82963	0.831337	0.0397879	0.0395427	-0.12	0.07	0.32	-0.37	0.92	1.047	1.247	0.773	37.1	40.3	38.8	50.3	15.01	14.26	9.81	9.38	High	High	High	High	High	High	High	High	High	High	High	High	High	High	High	High	Q9Z0U1 [263-271]	Q9Z0U1 2xPhospho [S265(100); S267(100)]	2.67	100	1	31.5	41.7	42.1
FALSE	High	[K].SKEEQELHDIHSTR.[S]	P35802	Neuronal membrane glycoprotein M6-a OS=Mus musculus GN=Gpm6a PE=1 SV=1		0.779139	0.736094	0.686375	0.0400657	0.31	0.62	-0.62	1.54	1.24	1.534	0.652	2.917	152.5	123	233.9	80.2	63.44	30.61	34.3	12.37	High	High	High	High	High	High	High	High	High	High	High	High	High	High	High	High	P35802 [256-269]	P35802 1xPhospho [S267(99.8)]	4.94	100	1	330.6	158.1	147.1
FALSE	High	[K].AAFSKDESKEPIVEVR.[T]	A0A0A6YY91	Neural cell adhesion molecule 1 (Fragment) OS=Mus musculus GN=Ncam1 PE=1 SV=1		0.964177	0.466163	0.22027	0.0403406	-0.02	0.09	-0.07	0.14	0.99	1.062	0.953	1.102	378.5	382.5	401.8	364.6	3.27	10.16	2.75	5.08	High	High	High	High	High	High	High	High	High	High	High	High	High	High	High	High	A0A0A6YY91 [741-756]	A0A0A6YY91 1xPhospho [S748(100)]	2.52	100	1	375.8	371.4	399.8
FALSE	High	[R].SQGSTSNSDWMK.[N]	P14873	Microtubule-associated protein 1B OS=Mus musculus GN=Map1b PE=1 SV=2		0.586616	0.980944	0.183887	0.0403604	0.34	-0.13	-0.55	0.77	1.268	0.916	0.681	1.706	42.8	33.8	39.2	23	20.64	34.3	13.18	24.84	High	High	High	High	High	High	High	High	High	High	High	High	High	High	High	High	P14873 [336-347]	P14873 2xPhospho [S339(99.7); S343(100)]	3.76	100	1	48	44.6	41.2
FALSE	High	[R].RPPSPDPNTK.[V]	Q62261	Spectrin beta chain, non-erythrocytic 1 OS=Mus musculus GN=Sptbn1 PE=1 SV=2		0.9218	0.490855	0.162908	0.0405887	-0.04	-0.1	0.1	-0.23	0.974	0.934	1.071	0.85	52.5	53.9	49.1	57.8	7.65	10.31	4.98	13.39	High	High	High	High	High	High	High	High	High	High	High	High	High	High	High	High	Q62261 [2099-2108]	Q62261 1xPhospho [S2102(100)]	2.54	100	1	52.4	52.7	59.3
FALSE	High	[K].ASLGSDDSTQAK.[E]	P51830	Adenylate cyclase type 9 OS=Mus musculus GN=Adcy9 PE=1 SV=1		0.392633	0.141506	0.798591	0.0413976	-0.3	-0.16	-0.15	-0.31	0.814	0.895	0.902	0.808	18.6	22.8	16.6	20.6	14.77	12.43	10.75	8.53	High	High	High	High	High	High	High	High	High	High	High	High	High	High	High	High	P51830 [1291-1302]	P51830 1xPhospho [S1295(100)]	2.8	100	1	18.1	24.3	18.4
FALSE	High	[R].SFTHSDCK.[S]	G3X9V4	Glutamate receptor ionotropic, NMDA 2B OS=Mus musculus GN=Grin2b PE=1 SV=1		0.203439	0.168216	0.0515922	0.0416574	0.24	-0.38	0.39	-0.52	1.181	0.77	1.308	0.695	14.9	12.6	11.4	16.5	6.28	18.48	20.55	8.01	High	High	High	High	High	High	High	High	High	High	High	High	High	High	High	High	G3X9V4 [940-947]		1.32	100	1	15	14.7	13.8
FALSE	High	[K].GAEASAASKEGDTEEEAGPQAAEPSTPSGPESGPTPASAEQNE.[-]	P28667	MARCKS-related protein OS=Mus musculus GN=Marcksl1 PE=1 SV=2		0.958877	0.52576	0.648368	0.041863	-0.03	0.25	-0.37	0.59	0.982	1.186	0.775	1.504	46.6	47.4	55.3	36.7	16.63	25.13	16.63	15.84	High	High	High	High	High	High	High	High	High	High	High	High	High	High	High	High	P28667 [158-200]	P28667 1xPhospho [T183(98.1)]	8.61	100	1	42.9	41	58.6
FALSE	High	[K].IIEQPECSSPVIETER.[T]	Q80V94	AP-4 complex subunit epsilon-1 OS=Mus musculus GN=Ap4e1 PE=1 SV=3		0.997228	0.925639	0.0105297	0.0433257	-0.04	-0.08	-0.54	0.42	0.97	0.949	0.686	1.342	19.8	20.4	18.8	14	17.86	13.75	8.24	15.97	High	High	High	High	High	High	High	High	High	High	High	High	High	High	High	High	Q80V94 [954-969]	Q80V94 1xPhospho [S962(100)]	3.27	100	1	25.4	16.8	19.1
FALSE	High	[K].EEQELHDIHSTRSKER.[L]	P35802	Neuronal membrane glycoprotein M6-a OS=Mus musculus GN=Gpm6a PE=1 SV=1		0.906154	0.847788	0.431581	0.0435102	0.36	0.52	-0.92	1.81	1.284	1.438	0.527	3.506	155.6	121.1	223.8	63.8	67.67	21.12	43.87	22.51	High	High	High	High	High	High	High	High	High	High	High	High	High	High	High	High	P35802 [258-273]	P35802 2xPhospho [S267(99.3); S270(99.3)]	7.64	100	1	337.6	178.2	135.8
FALSE	High	[R].DDGDEEGLLTHSEEELEHSQDTDAEDGALQ.[-]	Q64012	RNA-binding protein Raly OS=Mus musculus GN=Raly PE=1 SV=3		0.821945	0.99851	0.232657	0.0435488	0.11	0.03	-0.28	0.42	1.081	1.02	0.822	1.341	34.2	31.6	34.9	26	14.12	19.45	5.78	15.92	High	High	High	High	High	High	High	High	High	High	High	High	High	High	High	High	Q64012 [283-312]		4.21	100	1	36.7	31.8	39.4
FALSE	High	[K].LDGETASDSESR.[A]	Q99L43	Phosphatidate cytidylyltransferase 2 OS=Mus musculus GN=Cds2 PE=1 SV=1		0.915293	0.514534	0.761319	0.0440035	-0.2	-0.22	0.15	-0.57	0.873	0.859	1.112	0.674	42.5	48.6	36.5	54.1	19.12	13.48	19.08	7.59	High	High	High	High	High	High	High	High	High	High	High	High	High	High	High	High	Q99L43 [26-37]	Q99L43 1xPhospho [S32(100)]	4.14	100	1	46.2	57	39.1
FALSE	High	[R].AAPALTPPDR.[L]	P63318	Protein kinase C gamma type OS=Mus musculus GN=Prkcg PE=1 SV=1		0.347259	0.915358	0.912109	0.0444119	-0.11	-0.04	0	-0.15	0.93	0.97	0.999	0.903	312.7	336.4	303.5	336	3.95	4.31	5.37	6.08	High	High	High	High	High	High	High	High	High	High	High	High	High	High	High	High	P63318 [650-659]	P63318 1xPhospho [T655(100)]	2.6	100	1	332.9	314.5	310.9
FALSE	High	[R].EQQDTAESSDDFGSQLR.[H]	O88737	Protein bassoon OS=Mus musculus GN=Bsn PE=1 SV=4		0.326518	0.99945	0.544633	0.0447616	-0.38	0.09	0.2	-0.48	0.77	1.067	1.147	0.716	11.1	14.4	11.8	16.5	16.94	20.9	17.54	10.23	High	High	High	High	High	High	High	High	High	High	High	High	High	High	High	High	O88737 [810-826]	O88737 2xPhospho [S817(100); S818(100)]	2.8	100	1	9.3	10.3	13.7
FALSE	High	[R].SSSIDGSNVTVTPGPGEQTVDVEPR.[I]	Q8BXJ2	Transcriptional-regulating factor 1 OS=Mus musculus GN=Trerf1 PE=1 SV=1		0.381467	0.476915	0.0617242	0.0449462	-0.18	0.12	0.24	-0.31	0.88	1.087	1.182	0.809	33.5	38	36.4	44.9	12.02	9.89	3.61	8.11	High	High	High	High	High	High	High	High	High	High	High	High	High	High	High	High	Q8BXJ2 [762-786]		6.3	100	1	31	38.3	36.1
FALSE	High	[K].AEAKEESEESDEDMGFGLFD.[-]	P14869	60S acidic ribosomal protein P0 OS=Mus musculus GN=Rplp0 PE=1 SV=3		0.39235	0.947545	0.268911	0.0450731	-0.27	0.09	0.48	-0.67	0.828	1.063	1.398	0.63	7.3	8.8	7.7	12.3	22.25	13.7	18.89	25.48	High	High	High	High	High	High	High	High	High	High	High	High	High	High	High	High	P14869 [298-317]	P14869 1xPhospho [S307(100)]	4.23	100	1	7.6	7	8.6
FALSE	High	[K].LEPVSPPSPPHADPELELAPSR.[L]	Q9WU42	Nuclear receptor corepressor 2 OS=Mus musculus GN=Ncor2 PE=1 SV=3		0.999999	0.687311	0.268775	0.0451131	-0.03	-0.08	0.16	-0.27	0.977	0.945	1.115	0.828	34.8	35.6	32.9	39.7	7.56	15.27	8.9	5.72	High	High	High	High	High	High	High	High	High	High	High	High	High	High	High	High	Q9WU42 [145-166]	Q9WU42 2xPhospho [S149(100); S152(100)]	3.93	100	1	39.2	34.1	35.5
FALSE	High	[K].STPASPVQSPSK.[A]	Q9QYB8	Beta-adducin OS=Mus musculus GN=Add2 PE=1 SV=4		0.650671	0.868316	0.705573	0.0451376	-0.12	-0.19	0.16	-0.47	0.922	0.876	1.116	0.724	55.7	60.4	48.8	67.4	20.44	15.95	12.37	8.1	High	High	High	High	High	High	High	High	High	High	High	High	High	High	High	High	Q9QYB8 [598-609]	Q9QYB8 2xPhospho [S602(100); S606(100)]	5.09	100	1	60.5	67.2	51.3
FALSE	High	[R].AAVAASSSS.[-]	Q9D823	60S ribosomal protein L37 OS=Mus musculus GN=Rpl37 PE=3 SV=3		0.997949	0.553813	0.29673	0.045465	-0.17	-0.25	0.26	-0.68	0.887	0.841	1.195	0.625	9.1	10.2	7.6	12.2	9.62	23.34	23.42	11.66	High	High	High	High	High	High	High	High	High	High	High	High	High	High	High	High	Q9D823 [89-97]		1.86	100	1	8.9	10.8	8.9
FALSE	High	[R].SEEKPETVEEEDRAAEATEDQETSMS.[-]	Q8BHE3	Caytaxin OS=Mus musculus GN=Atcay PE=1 SV=1		0.447408	0.999838	0.435336	0.0456746	0.28	-0.02	-0.33	0.59	1.213	0.985	0.794	1.505	16.7	13.7	16.4	10.9	10.73	18.09	6.04	25.72	High	High	High	High	High	High	High	High	High	High	High	High	High	High	High	High	Q8BHE3 [347-372]		1.37	100	1	15.1	15.4	18
FALSE	High	[R].HYSQDCSSIK.[A]	F8VQ11	Rho GTPase-activating protein 23 OS=Mus musculus GN=Arhgap23 PE=1 SV=1		0.633829	0.998751	0.38371	0.0458974	-0.03	0.14	-0.44	0.55	0.978	1.103	0.738	1.46	21.5	22	23.7	16.3	26.46	20.99	12.71	9.95	High	High	High	High	High	High	High	High	High	High	High	High	High	High	High	High	F8VQ11 [386-395]	F8VQ11 1xPhospho [S388(100)]	2.84	100	1	33.5	22.8	19.9
FALSE	High	[R].RSSQPSPTTVPASDSPPAK.[Q]	A2AJI1	MAP7 domain-containing protein 1 OS=Mus musculus GN=Map7d1 PE=1 SV=1		0.0370949	0.0805586	0.0211559	0.0465214	0.25	-0.24	0.26	-0.25	1.19	0.846	1.197	0.841	43.2	36.3	36.6	43.5	5.14	8.78	10.17	5.25	High	High	High	High	High	High	High	High	High	High	High	High	High	High	High	High	A2AJI1 [113-131]	A2AJI1 2xPhospho [S118(100); S/T]	4.92	100	1	39.9	44.1	44.8
FALSE	High	[K].AAFSKDESKEPIVEVR.[T]	A0A0A6YY91	Neural cell adhesion molecule 1 (Fragment) OS=Mus musculus GN=Ncam1 PE=1 SV=1		0.917721	0.994005	0.0237936	0.0465527	0.02	-0.04	-0.34	0.33	1.017	0.973	0.788	1.255	373.2	367.1	363.3	289.4	15.79	5.89	7.38	2.85	High	High	High	High	High	High	High	High	High	High	High	High	High	High	High	High	A0A0A6YY91 [741-756]	A0A0A6YY91 2xPhospho [S744(100); S748(100)]	3.57	100	1	368.1	394.1	378.3
FALSE	High	[K].VGSVLDSRVSVDSNLFVYSK.[S]	Q8BPN8	DmX-like protein 2 OS=Mus musculus GN=Dmxl2 PE=1 SV=3		0.98641	0.775733	0.132974	0.046766	-0.21	0.35	-0.57	0.7	0.862	1.273	0.674	1.627	21.1	24.5	26.9	16.5	18.34	17.05	16.79	15.26	High	High	High	High	High	High	High	High	High	High	High	High	High	High	High	High	Q8BPN8 [1132-1151]	Q8BPN8 2xPhospho [S1138(99); S1144(100)]	4.18	100	1	22.6	19.8	27.9
FALSE	High	[K].CIEENNGVDK.[R]	P56564; O35874	Excitatory amino acid transporter 1 OS=Mus musculus GN=Slc1a3 PE=1 SV=2 Neutral amino acid transporter A OS=Mus musculus GN=Slc1a4 PE=1 SV=1	Shared	0.178367	0.00296004	0.928624	0.0470773	-0.25	0.56	0.02	0.29	0.842	1.474	1.015	1.223	11.8	14	17.4	14.2	2.39	21.2	11.13	12.24	High	High	High	High	High	High	High	High	High	High	High	High	High	High	High	High	P56564 [375-384]; O35874 [355-364]		1.48	100	2	12	11.5	12.1
FALSE	High	[K].GVNFAEEPMRSDSENGEEEEAAEAGAFNAPVINR.[F]	P31324	cAMP-dependent protein kinase type II-beta regulatory subunit OS=Mus musculus GN=Prkar2b PE=1 SV=3		0.99999	0.974905	0.100689	0.047336	-0.05	0	0.24	-0.29	0.965	0.998	1.179	0.817	25.9	26.9	25.9	31.7	11.56	5.64	9.47	13.95	High	High	High	High	High	High	High	High	High	High	High	High	High	High	High	High	P31324 [73-106]	P31324 2xPhospho [S83(100); S85(100)]	9.41	100	1	27.1	31.2	24.4
FALSE	High	[R].TLSNAEDYLDDEDSD.[-]	Q62422	Osteoclast-stimulating factor 1 OS=Mus musculus GN=Ostf1 PE=1 SV=2		0.3991	0.393378	0.0491821	0.0482145	0.09	-0.13	0.24	-0.28	1.062	0.913	1.182	0.821	45.4	42.8	41.5	50.5	4.07	8	12.2	7.21	High	High	High	High	High	High	High	High	High	High	High	High	High	High	High	High	Q62422 [201-215]	Q62422 1xPhospho [S214(100)]	4.25	100	1	45.9	44.7	45
FALSE	High	[R].DLYRPLSSDDLDSVGDSV.[-]	Q80VB6	Dclk1 protein OS=Mus musculus GN=Dclk1 PE=1 SV=1		0.61722	0.996893	0.440743	0.0483631	0.26	-0.04	-0.25	0.47	1.198	0.975	0.841	1.388	19.9	16.6	19.4	14	10.35	11.6	14.91	30.12	High	High	High	High	High	High	High	High	High	High	High	High	High	High	High	High	Q80VB6 [346-363]	Q80VB6 1xPhospho [S352(99.4)]	3.34	100	1	19.2	17	20.6
FALSE	High	[K].AKEEQELQDIQSR.[S]	P35803	Neuronal membrane glycoprotein M6-b OS=Mus musculus GN=Gpm6b PE=1 SV=2		0.93045	0.974988	0.0352715	0.0486112	-0.17	0.04	-0.97	0.84	0.886	1.03	0.511	1.784	139.9	157.9	144	80.7	26.43	25.23	19.97	23.98	High	High	High	High	High	High	High	High	High	High	High	High	High	High	High	High	P35803 [307-319]	P35803 1xPhospho [S318(100)]	2.73	100	1	149.7	130.8	153.8
FALSE	High	[R].KIAELEEERSQGSTSNSDWMK.[N]	P14873	Microtubule-associated protein 1B OS=Mus musculus GN=Map1b PE=1 SV=2		0.619366	0.999996	0.331415	0.0487501	0.2	0	-0.37	0.58	1.153	1.003	0.771	1.498	34	29.5	34.1	22.7	10.79	23	31.19	13.2	High	High	High	High	High	High	High	High	High	High	High	High	High	High	High	High	P14873 [327-347]		4.48	100	1	33.1	32.7	40.9
FALSE	High	[R].ANSKSEGSPVLPHEPSK.[V]	E9PUL9	Traf2 and NCK-interacting protein kinase OS=Mus musculus GN=Tnik PE=1 SV=1		0.82562	0.999773	0.177874	0.0493598	0.04	-0.06	0.34	-0.36	1.031	0.959	1.267	0.78	14.3	13.8	13.7	17.5	17.13	12.69	8.75	6.4	High	High	High	High	High	High	High	High	High	High	High	High	High	High	High	High	E9PUL9 [733-749]	E9PUL9 3xPhospho [S735(100); S737(100); S740(100)]	3.1	100	1	14.7	13.8	10.2
FALSE	High	[K].ASPDESQTLR.[Y]	Q9D415	Disks large-associated protein 1 OS=Mus musculus GN=Dlgap1 PE=1 SV=3		0.476564	0.973631	0.714277	0.0496494	-0.3	-0.04	0.16	-0.5	0.81	0.974	1.114	0.707	12.2	15.1	11.9	16.8	8.24	21.01	10.54	17.83	High	High	High	High	High	High	High	High	High	High	High	High	High	High	High	High	Q9D415 [168-177]	Q9D415 1xPhospho [S169(100)]	1.32	100	1	14.1	11.8	12.3
FALSE	High	[R].RLPSSPASPSPKGTPEKASER.[A]	A2AUK5	Band 4.1-like protein 1 OS=Mus musculus GN=Epb41l1 PE=1 SV=1		0.999749	0.162164	0.857788	0.0504469	-0.02	-0.25	0.08	-0.35	0.989	0.841	1.06	0.785	30.3	30.6	25.5	32.5	2.43	15.37	10.84	14.22	High	High	High	High	High	High	High	High	High	High	High	High	High	High	High	High	A2AUK5 [537-557]	A2AUK5 3xPhospho [S544(97.2); S546(100); T550(100)]	2.8	100	1	30.2	30.4	29.7
FALSE	High	[K].SPAEPKSPAEAKSPAEVK.[S]	P19246	Neurofilament heavy polypeptide OS=Mus musculus GN=Nefh PE=1 SV=3		0.153787	0.745732	0.984715	0.0509442	-0.38	-0.03	-0.01	-0.39	0.769	0.982	0.992	0.762	15.2	19.7	14.9	19.6	13.35	8.75	15.87	10	High	High	High	High	High	High	High	High	High	High	High	High	High	High	High	High	P19246 [685-702]	P19246 2xPhospho [S691(100); S697(100)]	1.51	100	1	19.1	14.6	15.7
FALSE	High	[R].KVAELEEEQSQGSSSYSDWVK.[N]	A2ARP8	Microtubule-associated protein 1A OS=Mus musculus GN=Map1a PE=1 SV=1		0.901108	0.988166	0.0273233	0.0515578	-0.44	0.3	-1.21	1.07	0.738	1.229	0.431	2.104	12.7	17.2	15.6	7.4	39.04	25.8	35.43	27.18	High	High	High	High	High	High	High	High	High	High	High	High	High	High	High	High	A2ARP8 [343-363]	A2ARP8 3xPhospho [S352(100); S355(100); S359(100)]	5.03	100	1	22.7	11.9	13.4
FALSE	High	[R].VNTPGSQEEDSRPSSAQLLSDDSYK.[T]	A0A087WNU5	Ankyrin-3 (Fragment) OS=Mus musculus GN=Ank3 PE=1 SV=1		0.988872	0.437792	0.709076	0.0520908	0.07	0.3	-0.05	0.42	1.048	1.232	0.965	1.338	19.4	18.5	23.8	17.8	16.08	20.93	13.9	7.17	High	High	High	High	High	High	High	High	High	High	High	High	High	High	High	High	A0A087WNU5 [1120-1144]	A0A087WNU5 1xPhospho [S1125(99.3)]	4.4	100	1	19.6	17.9	19.2
FALSE	High	[R].NMAPSQQSPVR.[T]	P62484	Abl interactor 2 OS=Mus musculus GN=Abi2 PE=1 SV=1		0.00202059	0.947071	0.124826	0.0522068	0.65	0.02	0.28	0.4	1.574	1.017	1.211	1.321	11.2	7.1	11.4	8.6	16.76	17.64	9.04	9.49	High	High	High	High	High	High	High	High	High	High	High	High	High	High	High	High	P62484 [214-224]	P62484 1xPhospho [S221(100)]	2.79	100	1	12.1	10.3	9.1
FALSE	High	[R].VSPPESPR.[A]	E9PWP6	Regulating synaptic membrane exocytosis protein 1 (Fragment) OS=Mus musculus GN=Rims1 PE=1 SV=3		0.9249	0.0641132	0.88501	0.0531572	0	-0.35	0	-0.35	1.001	0.786	1.003	0.785	93.8	93.7	73.7	93.9	13.4	12.36	7.03	14.86	High	High	High	High	High	High	High	High	High	High	High	High	High	High	High	High	E9PWP6 [442-449]	E9PWP6 2xPhospho [S443(100); S447(100)]	2.33	100	1	111.9	101.1	86.9
FALSE	High	[R].DGDSGSLGSPSASR.[E]	Q9JJY3	Sphingomyelin phosphodiesterase 3 OS=Mus musculus GN=Smpd3 PE=1 SV=1		0.999998	0.933806	0.146791	0.053579	0.02	0.13	-0.47	0.62	1.015	1.093	0.724	1.534	26	25.6	28.4	18.5	6.38	10.09	16.58	20.97	High	High	High	High	High	High	High	High	High	High	High	High	High	High	High	High	Q9JJY3 [284-297]	Q9JJY3 1xPhospho [S292(100)]	4.56	100	1	25.5	26.5	27
FALSE	High	[R].DTPASVDSIPLEWDHDYDLSR.[D]	Q6ZWR6	Nesprin-1 OS=Mus musculus GN=Syne1 PE=1 SV=2		0.919414	0.918367	0.0534982	0.0537838	0.11	-0.11	-0.26	0.25	1.079	0.924	0.838	1.189	31.2	28.9	28.8	24.3	6.62	5.44	12.38	17.42	High	High	High	High	High	High	High	High	High	High	High	High	High	High	High	High	Q6ZWR6 [8277-8297]	Q6ZWR6 2xPhospho [S8281(100); S8284(100)]	5.3	100	1	30.7	27.6	31.8
FALSE	High	[K].ETNVSKEDTDQEEKASNEDVTK.[A]	Q99JF8	PC4 and SFRS1-interacting protein OS=Mus musculus GN=Psip1 PE=1 SV=1		0.819745	0.175233	0.424232	0.0542125	0.19	-0.38	0.34	-0.53	1.14	0.768	1.265	0.692	16.1	14.1	12.3	17.8	13.5	22.82	16.87	26.62	High	High	High	High	High	High	High	High	High	High	High	High	High	High	High	High	Q99JF8 [114-135]	Q99JF8 1xPhospho [S129(100)]	1.4	100	1	17.7	18.2	13.8
FALSE	High	[R].SGPAEEEDVPGSPCPDAGDPQLGLDCPGEPDVR.[D]	H3BK80	PH and SEC7 domain-containing protein 2 OS=Mus musculus GN=Psd2 PE=1 SV=1		0.958327	0.852564	0.0922649	0.0550278	-0.12	0.23	-0.69	0.79	0.918	1.172	0.621	1.731	9.5	10.4	11.2	6.5	16.23	10.98	16.75	47.8	High	High	High	High	High	High	High	High	High	High	High	High	High	High	High	High	H3BK80 [99-131]	H3BK80 1xPhospho [S110(100)]	3.64	100	1	11.4	8.1	8.6
FALSE	High	[R].SSPAYCTSSSDITEPEQK.[M]	A0A0A6YVS6	Ras/Rap GTPase-activating protein SynGAP (Fragment) OS=Mus musculus GN=Syngap1 PE=1 SV=2		0.631973	0.840523	0.818998	0.0552975	0.13	0.2	-0.16	0.49	1.096	1.149	0.896	1.406	56.4	51.5	64.8	46.1	18.46	8.93	15.19	17.3	High	High	High	High	High	High	High	High	High	High	High	High	High	High	High	High	A0A0A6YVS6 [801-818]	A0A0A6YVS6 2xPhospho [S808(98.2); S810(99.1)]	3.97	100	1	54.8	49	58.1
FALSE	High	[R].AHSRDSSDSADGR.[A]	Q8BTV2	Cleavage and polyadenylation specificity factor subunit 7 OS=Mus musculus GN=Cpsf7 PE=1 SV=2		0.821099	0.75053	0.0022037	0.0559069	0.06	0.17	0.58	-0.35	1.044	1.126	1.497	0.786	13.1	12.6	14.8	18.8	14.26	11.62	11.15	12.4	High	High	High	High	High	High	High	High	High	High	High	High	High	High	High	High	Q8BTV2 [189-201]	Q8BTV2 2xPhospho [S195(99.1); S197(99.1)]	1.81	100	1	16.4	12.6	13.7
FALSE	High	[K].TPTPLMANDSTETSEAGEEEEDHEGDSENKER.[M]	Q80TB8	Synaptic vesicle membrane protein VAT-1 homolog-like OS=Mus musculus GN=Vat1l PE=1 SV=2		0.564645	0.858734	0.138108	0.0561571	0.15	0	-0.56	0.71	1.113	1.002	0.68	1.639	20.2	18.2	20.3	12.4	3.1	18.72	27.37	10.29	High	High	High	High	High	High	High	High	High	High	High	High	High	High	High	High	Q80TB8 [381-412]	Q80TB8 2xPhospho [T393(98); S394(100)]	5.18	100	1	20	20	21.3
FALSE	High	[R].NGSDDDNHPPPQTK.[R]	A2A6P4	Protein Fam104a OS=Mus musculus GN=Fam104a PE=1 SV=1		0.0286457	0.465149	0.281465	0.0562593	-0.38	-0.25	-0.23	-0.39	0.77	0.844	0.853	0.762	8.8	11.5	7.5	9.8	16.51	6.3	15.25	5.84	High	High	High	High	High	High	High	High	High	High	High	High	High	High	High	High	A2A6P4 [80-93]	A2A6P4 1xPhospho [S82(100)]	3.05	100	1	9.2	7	8.5
FALSE	High	[R].RRHSHSHSPMSTR.[R]	P62996	Transformer-2 protein homolog beta OS=Mus musculus GN=Tra2b PE=1 SV=1		0.997731	0.087902	0.999823	0.056564	0.03	0.28	-0.05	0.37	1.024	1.216	0.966	1.289	46.3	45.2	56.3	43.7	17.45	12.74	10.99	11.26	High	High	High	High	High	High	High	High	High	High	High	High	High	High	High	High	P62996 [92-104]	P62996 3xPhospho [S95(100); S97(100); S99(100)]	4.61	100	1	53.8	35	44.5
FALSE	High	[K].TVTPASSAK.[T]	O08553	Dihydropyrimidinase-related protein 2 OS=Mus musculus GN=Dpysl2 PE=1 SV=2		0.999986	0.49304	0.483988	0.0574092	0	-0.15	0.25	-0.39	1.003	0.903	1.189	0.762	35.1	35	31.7	41.6	6.05	8.95	1.73	15.51	High	High	High	High	High	High	High	High	High	High	High	High	High	High	High	High	O08553 [512-520]	O08553 1xPhospho [T514(100)]	2.95	100	1	32.5	36.1	34.2
FALSE	High	[R].LSRSRTASLTSAASIDGSR.[S]	Q9QYG0	Protein NDRG2 OS=Mus musculus GN=Ndrg2 PE=1 SV=1		0.999994	0.665005	0.33816	0.0574372	-0.03	0.13	-0.44	0.55	0.982	1.098	0.736	1.466	76.8	78.2	84.3	57.5	15.98	24.54	24.26	5.01	High	High	High	High	High	High	High	High	High	High	High	High	High	High	High	High	Q9QYG0 [325-343]	Q9QYG0 3xPhospho [S328(98.8); T330(100); S332(100)]	4.2	100	1	76.8	76.8	85.6
FALSE	High	[R].TASLTSAASIDGSR.[S]	Q9QYG0	Protein NDRG2 OS=Mus musculus GN=Ndrg2 PE=1 SV=1		0.606002	0.536915	0.0480004	0.057768	0.26	-0.14	-0.55	0.68	1.195	0.911	0.681	1.597	9.4	7.9	8.6	5.4	21.02	9.93	16.01	11.95	High	High	High	High	High	High	High	High	High	High	High	High	High	High	High	High	Q9QYG0 [330-343]	Q9QYG0 1xPhospho [S338(100)]	4.29	94	1	8.6	7.3	10.4
FALSE	High	[R].TDSTSDGRPAWMR.[T]	Q9JHU4	Cytoplasmic dynein 1 heavy chain 1 OS=Mus musculus GN=Dync1h1 PE=1 SV=2		0.988279	0.989769	0.161977	0.0578731	0.09	0.12	-0.56	0.77	1.065	1.09	0.679	1.71	20.7	19.4	22.6	13.2	12.98	13.94	18.19	47.31	High	High	High	High	High	High	High	High	High	High	High	High	High	High	High	High	Q9JHU4 [4364-4376]		1.43	100	1	23.6	21.5	17.3
FALSE	High	[R].LQDSSDPDTGSEEEVSSRLSPPHSPR.[D]	H3BJU7	Rho guanine nucleotide exchange factor 2 OS=Mus musculus GN=Arhgef2 PE=1 SV=1		0.999993	0.786973	0.250975	0.0581121	0.02	-0.09	0.11	-0.18	1.014	0.939	1.081	0.881	72.3	71.3	67.9	77.1	5.78	5.22	6.68	7.21	High	High	High	High	High	High	High	High	High	High	High	High	High	High	High	High	H3BJU7 [907-932]	H3BJU7 3xPhospho [S910(100); S911(100); S926(99.1)]	5.13	100	1	71.2	73.4	65.3
FALSE	High	[K].LTGMAFR.[V]	A0A0A0MQF6	Glyceraldehyde-3-phosphate dehydrogenase OS=Mus musculus GN=Gapdh PE=1 SV=1		0.224479	0.982715	0.640321	0.0581465	-0.52	0.2	0.19	-0.51	0.699	1.146	1.145	0.7	12.5	17.9	14.4	20.5	32.1	13.04	20.41	10.94	High	High	High	High	High	High	High	High	High	High	High	High	High	High	High	High	A0A0A0MQF6 [252-258]		1.07	100	1	12	9.9	13.1
FALSE	High	[K].YPQSPTNSK.[A]	G3X9V4	Glutamate receptor ionotropic, NMDA 2B OS=Mus musculus GN=Grin2b PE=1 SV=1		0.258618	0.136249	0.118053	0.0584335	0.3	-0.34	0.46	-0.49	1.232	0.791	1.372	0.711	23.4	19	18.5	26	8.69	21.26	13.87	16.09	High	High	High	High	High	High	High	High	High	High	High	High	High	High	High	High	G3X9V4 [1281-1289]	G3X9V4 1xPhospho [S1284(100)]	2.35	100	1	26.3	22.7	21.5
FALSE	High	[K].SIEQSIEQEEGLNR.[S]	O35526	Syntaxin-1A OS=Mus musculus GN=Stx1a PE=1 SV=3		0.927001	0.957249	0.0713096	0.0592433	-0.02	0.02	0.36	-0.35	0.988	1.014	1.279	0.782	21.2	21.4	21.4	27.4	9.44	18.72	6.02	17.05	High	High	High	High	High	High	High	High	High	High	High	High	High	High	High	High	O35526 [95-108]		4.01	100	1	17.8	21	22.2
FALSE	High	[R].ISITAQSSTDSAHESFTAAEGPAR.[R]	B1AS06	Disks large-associated protein 3 OS=Mus musculus GN=Dlgap3 PE=1 SV=1		0.997382	0.0817937	0.999999	0.0602316	0.14	0.31	0.01	0.44	1.102	1.24	1.008	1.356	29.4	26.7	36.4	26.9	11.55	8.99	20.45	9.91	High	High	High	High	High	High	High	High	High	High	High	High	High	High	High	High	B1AS06 [552-575]	B1AS06 3xPhospho [S558(98.8); S/T]	3.93	100	1	29.8	23.5	30.8
FALSE	High	[K].ETSPETSLIQDEVALK.[L]	P20357	Microtubule-associated protein 2 OS=Mus musculus GN=Map2 PE=1 SV=2		0.939993	0.512183	0.819362	0.0606118	-0.08	-0.1	0.1	-0.28	0.949	0.934	1.074	0.825	118.8	125.3	111	134.6	9.54	18.8	9.49	5.3	High	High	High	High	High	High	High	High	High	High	High	High	High	High	High	High	P20357 [1159-1174]		5.18	100	1	112	139	118.5
FALSE	High	[K].QSNASSDVEVEEKETNVSKEDTDQEEK.[A]	Q99JF8	PC4 and SFRS1-interacting protein OS=Mus musculus GN=Psip1 PE=1 SV=1		0.920467	0.986541	0.281086	0.0606224	0.1	0.1	-0.37	0.57	1.074	1.074	0.775	1.488	13.9	12.9	14.9	10	21.24	13.32	7.04	29.9	High	High	High	High	High	High	High	High	High	High	High	High	High	High	High	High	Q99JF8 [101-127]	Q99JF8 2xPhospho [S106(98.6); S/T]	4.52	100	1	11.7	16.9	16.4
FALSE	High	[R].SLSPSPDSSTAADPPTPPQLR.[E]	E9Q6H8	Protein Plekha5 OS=Mus musculus GN=Plekha5 PE=1 SV=1		0.970971	0.68544	0.579604	0.0607062	-0.1	-0.14	0.09	-0.33	0.936	0.908	1.066	0.797	28.5	30.5	25.9	32.5	6.47	14.16	10.19	10.32	High	High	High	High	High	High	High	High	High	High	High	High	High	High	High	High	E9Q6H8 [1241-1261]	E9Q6H8 2xPhospho [S1243(97.9); T1256(100)]	1.76	100	1	29.8	25.8	29.4
FALSE	High	[R].QGSPTQSPPADTSFGSR.[R]	Q99NE5	Regulating synaptic membrane exocytosis protein 1 OS=Mus musculus GN=Rims1 PE=1 SV=2		0.998444	0.899531	0.146006	0.0607612	-0.07	-0.05	0.2	-0.31	0.955	0.969	1.145	0.808	49.6	51.9	48	59.4	15.55	8.14	10.9	5.12	High	High	High	High	High	High	High	High	High	High	High	High	High	High	High	High	Q99NE5 [1021-1037]	Q99NE5 2xPhospho [S1023(99.5); S1027(100)]	3.6	100	1	62.2	45.9	53.6
FALSE	High	[K].ESSESTNTTIEDEDTKVR.[K]	P11798	Calcium/calmodulin-dependent protein kinase type II subunit alpha OS=Mus musculus GN=Camk2a PE=1 SV=2		0.835079	0.862962	0.617021	0.0609895	-0.01	-0.21	0.2	-0.42	0.991	0.867	1.145	0.75	54.3	54.8	47	62.7	10.88	23.79	8.46	4.57	High	High	High	High	High	High	High	High	High	High	High	High	High	High	High	High	P11798 [329-346]	P11798 1xPhospho [S331(99.1)]	4.11	100	1	55.2	53.4	43.5
FALSE	High	[R].STEPSHSRDASPVGVK.[G]	O88602	Voltage-dependent calcium channel gamma-2 subunit OS=Mus musculus GN=Cacng2 PE=1 SV=1		0.986989	0.991802	0.16792	0.0612967	-0.09	0.12	-0.33	0.37	0.94	1.09	0.793	1.291	36.7	39	40	31	15.95	8.62	7.12	21.42	High	High	High	High	High	High	High	High	High	High	High	High	High	High	High	High	O88602 [243-258]	O88602 2xPhospho [S249(100); S253(100)]	4.17	100	1	49.1	36.8	36
FALSE	High	[R].RGSDAEKRSLDSR.[G]	Q3UHD9	Arf-GAP with GTPase, ANK repeat and PH domain-containing protein 2 OS=Mus musculus GN=Agap2 PE=1 SV=1		0.810809	0.323553	0.998311	0.0618598	-0.31	-0.37	-0.04	-0.64	0.804	0.776	0.97	0.643	19	23.6	14.8	22.9	30.98	27.23	14.78	11.47	High	High	High	High	High	High	High	High	High	High	High	High	High	High	High	High	Q3UHD9 [648-660]	Q3UHD9 2xPhospho [S650(100); S]	1.82	100	1	15	15.3	23.6
FALSE	High	[K].AAGEGPSPR.[R]	Q920N2	Biotin--protein ligase OS=Mus musculus GN=Hlcs PE=1 SV=1		0.998001	0.0297971	0.993561	0.0631869	0.07	-0.62	0.06	-0.61	1.05	0.653	1.044	0.657	16.4	15.6	10.7	16.3	10.19	18.49	10.99	20.96	High	High	High	High	High	High	High	High	High	High	High	High	High	High	High	High	Q920N2 [67-75]	Q920N2 1xPhospho [S73(100)]	1.57	100	1	17	16.6	16.2
FALSE	High	[R].RESGLDTGGQR.[K]	Q61762	Potassium voltage-gated channel subfamily A member 5 OS=Mus musculus GN=Kcna5 PE=2 SV=2		0.917088	0.0854544	0.84516	0.063242	0.06	-0.47	0.23	-0.64	1.045	0.721	1.172	0.643	7.8	7.4	5.6	8.7	34.66	5.45	14.7	25.5	High	High	High	High	High	High	High	High	High	High	High	High	High	High	High	High	Q61762 [533-543]	Q61762 1xPhospho [S535(100)]	1.14	100	1	7.7	12.7	7.8
FALSE	High	[K].EGGGDSSASSPTEEEQEQGEMSACSDEGTAQEGK.[A]	P28667	MARCKS-related protein OS=Mus musculus GN=Marcksl1 PE=1 SV=2		0.405386	0.321433	0.086205	0.0637336	-0.13	0.12	-0.29	0.28	0.914	1.088	0.818	1.217	45.3	49.6	49.3	40.5	8.68	4.49	8.42	12.62	High	High	High	High	High	High	High	High	High	High	High	High	High	High	High	High	P28667 [111-144]	P28667 2xPhospho [S120(99.5); S/T]	3.56	100	1	41.1	44.2	50.5
FALSE	High	[K].SSSSERPEPQQK.[A]	A0A0R4J124	SRSF protein kinase 2 OS=Mus musculus GN=Srpk2 PE=1 SV=1		0.865766	0.767627	0.045187	0.0637839	-0.05	0.1	0.29	-0.25	0.963	1.075	1.227	0.844	134.3	139.5	144.4	171.2	4.53	10.56	13.03	1.68	High	High	High	High	High	High	High	High	High	High	High	High	High	High	High	High	A0A0R4J124 [8-19]		1.45	100	1	130.1	132.1	136.6
FALSE	High	[K].KPESSKDSSEDESGPEEK.[Q]	Q3UYG8	O-acetyl-ADP-ribose deacetylase MACROD2 OS=Mus musculus GN=Macrod2 PE=1 SV=1		0.992901	0.240684	0.942675	0.0638045	-0.1	-0.28	0.01	-0.38	0.933	0.826	1.004	0.768	37.5	40.2	31	40.3	17.38	9.5	12.27	6.07	High	High	High	High	High	High	High	High	High	High	High	High	High	High	High	High	Q3UYG8 [276-293]	Q3UYG8 3xPhospho [S288(100); S]	3.47	100	1	43.3	44.4	32.3
FALSE	High	[K].AMGDEDSGDSDTSPKPSPK.[V]	Q9D415	Disks large-associated protein 1 OS=Mus musculus GN=Dlgap1 PE=1 SV=3		0.978658	0.913057	0.327593	0.0639755	-0.06	-0.13	0.32	-0.51	0.959	0.917	1.252	0.703	19.9	20.7	18.2	26	13.14	11.28	23.77	15.33	High	High	High	High	High	High	High	High	High	High	High	High	High	High	High	High	Q9D415 [356-374]	Q9D415 2xPhospho [S362(100); S365(100)]	4.98	100	1	21.7	17.4	18.2
FALSE	High	[K].AAQGPAGSPDKGK.[H]	Q9QWI6	SRC kinase signaling inhibitor 1 OS=Mus musculus GN=Srcin1 PE=1 SV=2		0.591139	0.363773	0.129751	0.0641982	0.14	-0.18	0.46	-0.5	1.102	0.883	1.378	0.706	14	12.7	12.4	17.6	28.65	11.78	15.66	18.7	High	High	High	High	High	High	High	High	High	High	High	High	High	High	High	High	Q9QWI6 [1178-1190]	Q9QWI6 1xPhospho [S1185(100)]	3.59	100	1	11.5	12.4	15.9
FALSE	High	[K].EEQELHDIHSTR.[S]	P35802	Neuronal membrane glycoprotein M6-a OS=Mus musculus GN=Gpm6a PE=1 SV=1		0.405948	0.947787	0.907609	0.0643112	0.5	0.38	-0.31	1.19	1.413	1.301	0.806	2.28	73.3	51.9	95.4	41.8	53.38	5.16	28.98	15.1	High	High	High	High	High	High	High	High	High	High	High	High	High	High	High	High	P35802 [258-269]	P35802 1xPhospho [S267(99.8)]	5.22	100	1	145	83.3	64.5
FALSE	High	[K].SDSNASFLR.[A]	Q8C8R3	Ankyrin-2 OS=Mus musculus GN=Ank2 PE=1 SV=2		0.999565	0.946588	0.186593	0.0646903	0.09	0.25	-1.01	1.34	1.067	1.185	0.498	2.54	36.1	33.8	42.8	16.8	43.63	54.5	37.92	19.61	High	High	High	High	High	High	High	High	High	High	High	High	High	High	High	High	Q8C8R3 [29-37]	Q8C8R3 1xPhospho [S31(100)]	2.08	100	1	54.4	28.5	45.7
FALSE	High	[K].ESESDQEPEEEIGMTSEKNDETESTETSVLK.[S]	Q8C8R3	Ankyrin-2 OS=Mus musculus GN=Ank2 PE=1 SV=2		0.987665	0.340635	0.878593	0.0647558	0.05	0.38	-0.09	0.51	1.034	1.301	0.941	1.429	7.9	7.6	10.2	7.2	10.26	12.76	29.49	15.14	High	High	High	High	High	High	High	High	High	High	High	High	High	High	High	High	Q8C8R3 [1425-1455]		2.83	100	1	9.1	7.4	8.3
FALSE	High	[K].AGEASAESTGAADGAAPEEGEAK.[K]	Q91XV3	Brain acid soluble protein 1 OS=Mus musculus GN=Basp1 PE=1 SV=3		0.999252	0.638726	0.471212	0.0648568	0.01	0.15	-0.24	0.4	1.006	1.11	0.849	1.316	49.9	49.6	55.4	42.1	12.46	13.25	18.66	5.99	High	High	High	High	High	High	High	High	High	High	High	High	High	High	High	High	Q91XV3 [124-146]	Q91XV3 2xPhospho [S128(100); S131(100)]	9.52	100	1	54.1	51.8	48
FALSE	High	[K].IEDVGSDEEDDSGK.[D]	P11499	Heat shock protein HSP 90-beta OS=Mus musculus GN=Hsp90ab1 PE=1 SV=3		0.998437	0.287518	0.698997	0.0654916	0.07	-0.36	0.15	-0.43	1.051	0.781	1.107	0.741	85	80.8	66.3	89.5	20.62	13.84	7.45	8.26	High	High	High	High	High	High	High	High	High	High	High	High	High	High	High	High	P11499 [250-263]	P11499 1xPhospho [S255(100)]	4.29	100	1	86.9	100.6	83.1
FALSE	High	[K].YQVDPDACFSAK.[V]	Q60932	Voltage-dependent anion-selective channel protein 1 OS=Mus musculus GN=Vdac1 PE=1 SV=3		0.970203	0.0289509	0.999988	0.0655405	-0.19	0.73	-0.02	0.55	0.875	1.657	0.988	1.468	27.9	31.9	46.2	31.5	30.16	19.33	7.62	17.74	High	High	High	High	High	High	High	High	High	High	High	High	High	High	High	High	Q60932 [238-249]		2.81	100	1	44.2	23.1	28.7
FALSE	High	[K].GAESAESADAAIMNNDPNFTETIDESK.[K]	E9QNF7	Contactin-associated protein-like 2 OS=Mus musculus GN=Cntnap2 PE=1 SV=1		0.150042	0.0849267	0.118304	0.0661537	0.21	-0.35	0.3	-0.44	1.155	0.784	1.231	0.736	9.7	8.4	7.6	10.4	10.03	21.37	10.97	4.72	High	High	High	High	High	High	High	High	High	High	High	High	High	High	High	High	E9QNF7 [1301-1327]	E9QNF7 1xPhospho [S1307(99.5)]	5.25	100	1	9.3	10	11.5
FALSE	High	[K].LIDLEDSADVGEQPGEVGYSGSPAEAPPSK.[S]	F6R6F1	RalBP1-associated Eps domain-containing protein 1 (Fragment) OS=Mus musculus GN=Reps1 PE=1 SV=1		0.49764	0.126469	0.0121888	0.0663106	-0.11	0.24	0.6	-0.47	0.924	1.182	1.511	0.723	8.8	9.6	10.4	14.4	17.8	12.13	9.23	20.51	High	High	High	High	High	High	High	High	High	High	High	High	High	High	High	High	F6R6F1 [358-387]		4.28	100	1	8.8	6.1	8.8
FALSE	High	[K].SQSIDEIDVGTYK.[V]	A0A0G2JDT9	Leucine-rich repeat-containing protein 7 OS=Mus musculus GN=Lrrc7 PE=1 SV=1		0.911373	0.665332	0.757512	0.0667842	-0.04	-0.56	0.48	-1.08	0.972	0.68	1.396	0.474	21.3	21.9	14.5	30.6	19.05	32.33	50.12	15.34	High	High	High	High	High	High	High	High	High	High	High	High	High	High	High	High	A0A0G2JDT9 [952-964]	A0A0G2JDT9 2xPhospho [S952(100); S954(100)]	2.11	100	1	22.9	19.8	16.3
FALSE	High	[R].RHSSLPTESDEDIAPAQR.[V]	O54774	AP-3 complex subunit delta-1 OS=Mus musculus GN=Ap3d1 PE=1 SV=1		0.318697	0.607547	0.993468	0.0673997	-0.3	-0.28	-0.09	-0.49	0.815	0.822	0.942	0.711	33.4	41	27.4	38.6	19.59	16.38	25.01	11.33	High	High	High	High	High	High	High	High	High	High	High	High	High	High	High	High	O54774 [752-769]	O54774 2xPhospho [S760(100); S/T]	3.11	100	1	26.7	28.9	39.4
FALSE	High	[K].QKGSEENLDETR.[E]	Q9QYC0; F8WGR0	Alpha-adducin OS=Mus musculus GN=Add1 PE=1 SV=2 Alpha-adducin OS=Mus musculus GN=Add1 PE=1 SV=1	Shared	0.695173	0.672583	0.0727208	0.0680314	0.11	-0.09	0.25	-0.23	1.076	0.942	1.19	0.851	44.2	41.1	41.6	48.9	9.73	11.34	9.14	6.56	High	High	High	High	High	High	High	High	High	High	High	High	High	High	High	High	Q9QYC0 [583-594]; F8WGR0 [614-625]	Q9QYC0 1xPhospho [S586(100)]; F8WGR0 1xPhospho [S617(100)]	2.12	100	2	44.1	50.7	40.2
FALSE	High	[K].KPESSKDSSEDESGPEEK.[Q]	Q3UYG8	O-acetyl-ADP-ribose deacetylase MACROD2 OS=Mus musculus GN=Macrod2 PE=1 SV=1		0.760491	0.744562	0.0649566	0.0682643	-0.19	0.21	0.35	-0.33	0.877	1.155	1.274	0.796	43.2	49.2	49.9	62.7	22.84	4.55	7.4	4.91	High	High	High	High	High	High	High	High	High	High	High	High	High	High	High	High	Q3UYG8 [276-293]		3.72	100	1	46.6	60.7	37.1
FALSE	High	[R].YVSSDGTEKEEVTMQGMPQEPVNIEDGDNYSK.[V]	Q8C8R3	Ankyrin-2 OS=Mus musculus GN=Ank2 PE=1 SV=2		0.519848	0.983628	0.74061	0.0687229	0.16	0.06	-0.21	0.43	1.115	1.045	0.863	1.35	27.9	25	29.2	21.6	21.38	17.69	5.4	13.11	High	High	High	High	High	High	High	High	High	High	High	High	High	High	High	High	Q8C8R3 [3848-3879]	Q8C8R3 1xPhospho [S3850(99.3)]	6.52	100	1	29.2	20.7	35.1
FALSE	High	[R].ANSKSEGSPVLPHEPSK.[V]	E9PUL9	Traf2 and NCK-interacting protein kinase OS=Mus musculus GN=Tnik PE=1 SV=1		0.0367908	0.975459	0.999964	0.0691332	0.29	-0.04	-0.02	0.27	1.224	0.972	0.987	1.204	15.8	12.9	15.4	12.8	6.73	6.53	6.79	13.09	High	High	High	High	High	High	High	High	High	High	High	High	High	High	High	High	E9PUL9 [733-749]	E9PUL9 2xPhospho [S740(99.5); S]	2.45	100	1	16.1	15.6	16.6
FALSE	High	[K].LEGNSPQGSSHGVK.[I]	P55258	Ras-related protein Rab-8A OS=Mus musculus GN=Rab8a PE=1 SV=2		0.749972	0.200491	0.385441	0.0693948	-0.19	0.32	-0.17	0.3	0.875	1.252	0.888	1.233	25.2	28.9	31.6	25.6	20.27	9.27	5.72	15.32	High	High	High	High	High	High	High	High	High	High	High	High	High	High	High	High	P55258 [177-190]	P55258 2xPhospho [S181(100); S185(99.6)]	3.45	100	1	26.4	33.1	24.2
FALSE	High	[R].AASSPNLSNGETESVK.[T]	A0A0A6YW53	Mitogen-activated protein kinase kinase kinase kinase 4 OS=Mus musculus GN=Map4k4 PE=1 SV=1		0.688216	0.884005	0.787535	0.0695708	-0.03	-0.13	0.28	-0.44	0.978	0.914	1.214	0.736	19.3	19.7	17.6	23.9	7.13	15.79	9.51	15.58	High	High	High	High	High	High	High	High	High	High	High	High	High	High	High	High	A0A0A6YW53 [847-862]	A0A0A6YW53 1xPhospho [S850(99.6)]	2.28	100	1	20.2	19.4	17.1
FALSE	High	[K].QIIEMSADEDASGSEDEEFIR.[S]	Q9QYX7	Protein piccolo OS=Mus musculus GN=Pclo PE=1 SV=4		0.883268	0.999955	0.210832	0.0701276	-0.01	0.02	0.21	-0.19	0.995	1.017	1.154	0.877	90.3	90.8	91.9	104.8	7.77	10.01	8.7	3.16	High	High	High	High	High	High	High	High	High	High	High	High	High	High	High	High	Q9QYX7 [1494-1514]	Q9QYX7 2xPhospho [S1505(100); S1507(100)]	6.18	100	1	79.5	90.4	90.2
FALSE	High	[K].TASEPNLK.[VL]	A2AWS5	Histone deacetylase 5 OS=Mus musculus GN=Hdac5 PE=1 SV=1		0.871669	0.258756	0.426509	0.070265	-0.19	0.3	-0.27	0.38	0.875	1.229	0.827	1.3	14.2	16.3	17.5	13.4	12.34	21.31	1.57	6.85	High	High	High	High	High	High	High	High	High	High	High	High	High	High	High	High	A2AWS5 [249-256]		1.88	100	1	14.9	13.6	16.9
FALSE	High	[R].RSSSVDTAR.[I]	B1AS06	Disks large-associated protein 3 OS=Mus musculus GN=Dlgap3 PE=1 SV=1		0.99807	0.700224	0.301368	0.071038	0.08	-0.36	0.47	-0.75	1.055	0.781	1.381	0.597	17.5	16.6	13.7	22.9	39.66	15.16	34.76	39.45	High	High	High	High	High	High	High	High	High	High	High	High	High	High	High	High	B1AS06 [426-434]	B1AS06 2xPhospho [S428(100); S429(100)]	2.67	100	1	20	10.5	27.6
FALSE	High	[K].NTASLNSR.[E]	Q6S5J6	Krev interaction trapped protein 1 OS=Mus musculus GN=Krit1 PE=1 SV=1		0.997917	0.558945	0.414474	0.0715721	0.12	0.02	-0.29	0.43	1.085	1.016	0.819	1.345	61.1	56.3	62.1	46.1	22.67	10.88	8.45	10.61	High	High	High	High	High	High	High	High	High	High	High	High	High	High	High	High	Q6S5J6 [19-26]	Q6S5J6 1xPhospho [S22(99.7)]	2.07	100	1	65.6	56.9	66.5
FALSE	High	[R].TDTAADGETSATESDQEEDAEIKAQDLDK.[T]	Q9WV92	Band 4.1-like protein 3 OS=Mus musculus GN=Epb41l3 PE=1 SV=1		0.96305	0.364493	0.937051	0.0721993	0.07	-0.54	0.2	-0.67	1.051	0.69	1.15	0.63	19.7	18.8	13.6	21.6	20.96	13.56	19.54	16.19	High	High	High	High	High	High	High	High	High	High	High	High	High	High	High	High	Q9WV92 [534-562]	Q9WV92 2xPhospho [S543(98.6); S547(98.6)]	6.75	100	1	19.4	20.1	21.7
FALSE	High	[K].SASSPKPDTK.[V]	Q9JKC6	Cell cycle exit and neuronal differentiation protein 1 OS=Mus musculus GN=Cend1 PE=1 SV=1		0.999228	0.872781	0.200402	0.0724387	-0.08	-0.05	0.2	-0.32	0.948	0.968	1.149	0.799	39.2	41.3	37.9	47.4	16.57	6.87	11.15	15.43	High	High	High	High	High	High	High	High	High	High	High	High	High	High	High	High	Q9JKC6 [7-16]		1.97	100	1	38.4	50.7	39.9
FALSE	High	[R].YTGSPDSLRSR.[VT]	P70207	Plexin-A2 OS=Mus musculus GN=Plxna2 PE=1 SV=2		0.64881	0.5371	0.0524153	0.0728534	0.15	-0.28	-0.46	0.33	1.112	0.823	0.727	1.258	53	47.7	43.6	34.7	10.98	15.22	20.88	10.83	High	High	High	High	High	High	High	High	High	High	High	High	High	High	High	High	P70207 [1627-1637]	P70207 2xPhospho [S1630(100); S1633(100)]	3.38	100	1	52.3	58.7	53.8
FALSE	High	[R].RVSVCAETFNPDEEEEDNDPR.[V]	A0A0A6YX73	cAMP-dependent protein kinase type II-alpha regulatory subunit OS=Mus musculus GN=Prkar2a PE=1 SV=1		0.927867	0.95079	0.407279	0.0728998	0.16	0.04	-0.15	0.35	1.119	1.031	0.904	1.277	53.4	47.7	55.1	43.1	17.84	10.14	9.9	12.71	High	High	High	High	High	High	High	High	High	High	High	High	High	High	High	High	A0A0A6YX73 [95-115]	A0A0A6YX73 1xPhospho [S97(100)]	6.94	100	1	56	51	63.8
FALSE	High	[R].SAAESISESVPVGPK.[V]	P56399	Ubiquitin carboxyl-terminal hydrolase 5 OS=Mus musculus GN=Usp5 PE=1 SV=1		0.880513	0.985806	0.380764	0.0734425	0.32	0.09	-0.52	0.93	1.247	1.062	0.697	1.901	35.6	28.5	37.8	19.9	27	35.47	24.56	20.19	High	High	High	High	High	High	High	High	High	High	High	High	High	High	High	High	P56399 [779-793]	P56399 2xPhospho [S783(100); S785(100)]	3.88	100	1	41	35.7	35.5
FALSE	High	[K].SPPREGSQGELTPANSQSR.[M]	Q99LD4	COP9 signalosome complex subunit 1 OS=Mus musculus GN=Gps1 PE=1 SV=1		0.995502	0.693215	0.519275	0.0738828	0.01	0.15	-0.17	0.33	1.007	1.109	0.891	1.253	66.8	66.3	74.1	59.1	14.05	4.01	9.68	10.73	High	High	High	High	High	High	High	High	High	High	High	High	High	High	High	High	Q99LD4 [448-466]	Q99LD4 1xPhospho [S454(100)]	3	100	1	57.5	62.9	70.9
FALSE	High	[R].APPDSPTTPVR.[S]	Q6PCN3	Tau-tubulin kinase 1 OS=Mus musculus GN=Ttbk1 PE=1 SV=3		0.20477	0.950833	0.999634	0.0744967	0.27	0.09	-0.16	0.53	1.208	1.065	0.893	1.44	12.1	10	12.9	8.9	10.97	24.09	24.91	8.49	High	High	High	High	High	High	High	High	High	High	High	High	High	High	High	High	Q6PCN3 [437-447]	Q6PCN3 2xPhospho [S441(99.7); T]	1.48	100	1	12.1	13.7	12.1
FALSE	High	[K].KGSSEESVDEDR.[G]	Q8C8R3	Ankyrin-2 OS=Mus musculus GN=Ank2 PE=1 SV=2		0.899513	0.910939	0.531784	0.0752757	-0.21	-0.07	0.21	-0.49	0.863	0.952	1.155	0.712	43.5	50.4	41.4	58.2	20.29	22.49	27.65	24.45	High	High	High	High	High	High	High	High	High	High	High	High	High	High	High	High	Q8C8R3 [1697-1708]	Q8C8R3 2xPhospho [S1699(100); S1700(100)]	2.72	100	1	50	55.3	36.9
FALSE	High	[K].TRSLPDR.[T]	Q9WV69	Dematin OS=Mus musculus GN=Dmtn PE=1 SV=1		0.0422146	0.825635	0.952766	0.0755437	-0.44	0.21	0.03	-0.26	0.738	1.154	1.02	0.834	35.4	48	40.8	48.9	16.2	1.84	9.35	14.68	High	High	High	High	High	High	High	High	High	High	High	High	High	High	High	High	Q9WV69 [267-273]	Q9WV69 1xPhospho [S269(99.7)]	2.19	100	1	33	45.8	38
FALSE	High	[K].EVIEASDKEGLSPAKR.[T]	Q61136	Serine/threonine-protein kinase PRP4 homolog OS=Mus musculus GN=Prpf4b PE=1 SV=3		0.943079	0.209591	0.999829	0.0755941	0.11	0.27	-0.08	0.46	1.081	1.206	0.947	1.376	35.5	32.9	42.8	31.1	15.03	2.28	11.79	14.04	High	High	High	High	High	High	High	High	High	High	High	High	High	High	High	High	Q61136 [83-98]	Q61136 2xPhospho [S88(100); S94(100)]	2.09	100	1	34.2	40.4	36.9
FALSE	High	[R].ETTGSESDGGDSSSTK.[S]	Q8R550	SH3 domain-containing kinase-binding protein 1 OS=Mus musculus GN=Sh3kbp1 PE=1 SV=1		0.936943	0.941911	0.420909	0.0758424	-0.17	-0.16	0.2	-0.52	0.89	0.895	1.145	0.695	19.6	22	17.5	25.2	7.72	19.54	26.5	4.31	High	High	High	High	High	High	High	High	High	High	High	High	High	High	High	High	Q8R550 [221-236]		4.82	100	1	17	19.5	20.4
FALSE	High	[K].TGTLTQNR.[M]	A0A0G2JGX4; Q8VDN2; D3YYN7	Sodium/potassium-transporting ATPase subunit alpha OS=Mus musculus GN=Atp1a3 PE=1 SV=1 Sodium/potassium-transporting ATPase subunit alpha-1 OS=Mus musculus GN=Atp1a1 PE=1 SV=1 Sodium/potassium-transporting ATPase subunit alpha OS=Mus musculus GN=Atp1a2 PE=1 SV=1	Shared	0.148329	0.999846	0.986691	0.0759958	-0.27	-0.04	-0.01	-0.3	0.83	0.973	0.995	0.811	38	45.9	37	45.6	13.62	10.88	5.44	8.04	High	High	High	High	High	High	High	High	High	High	High	High	High	High	High	High	A0A0G2JGX4 [381-388]; Q8VDN2 [378-385]; D3YYN7 [376-383]		0.87	100	3	32.9	41.4	35
FALSE	High	[K].SETSSNPSSPEICPNKEKPFIK.[L]	Q5SVL6	Rap1 GTPase-activating protein 2 OS=Mus musculus GN=Rap1gap2 PE=1 SV=1		0.91741	0.698475	0.162319	0.0767981	-0.22	0.16	-0.64	0.58	0.86	1.119	0.643	1.496	12.4	14.5	13.9	9.3	16.45	31.32	16.37	9.96	High	High	High	High	High	High	High	High	High	High	High	High	High	High	High	High	Q5SVL6 [586-607]	Q5SVL6 2xPhospho [S589(95.6); S590(95.6)]	3.35	100	1	9.3	12.5	12.4
FALSE	High	[K].QQESDDSLVDYGEGGEGQFNEDGSFIGQYTVK.[K]	A0A087WPX3	Neurofascin OS=Mus musculus GN=Nfasc PE=1 SV=1		0.994984	0.946467	0.127458	0.0768168	0.27	-0.18	-0.86	0.95	1.206	0.881	0.551	1.929	14	11.6	12.3	6.4	41.21	16.88	33.9	37.15	High	High	High	High	High	High	High	High	High	High	High	High	High	High	High	High	A0A087WPX3 [1291-1322]	A0A087WPX3 3xPhospho [S1294(100); S1297(100); S1314(100)]	5.55	100	1	16.9	12.7	15.4
FALSE	High	[R].AASEDMTSDEER.[M]	Q924A2	Protein capicua homolog OS=Mus musculus GN=Cic PE=1 SV=2		0.982759	0.320017	0.592129	0.077158	0.19	-0.47	0.29	-0.56	1.141	0.723	1.22	0.677	10.2	9	7.4	10.9	14.86	19.79	24.22	39.22	High	High	High	High	High	High	High	High	High	High	High	High	High	High	High	High	Q924A2 [1336-1347]	Q924A2 2xPhospho [S1338(100); T/S]	1.95	100	1	10.8	11.8	8.3
FALSE	High	[R].VRTESSEALKAEK.[R]	A2ARP8	Microtubule-associated protein 1A OS=Mus musculus GN=Map1a PE=1 SV=1		0.49876	0.323354	0.138993	0.0781184	0.18	-0.26	0.27	-0.36	1.133	0.833	1.209	0.78	21.2	18.7	17.6	22.6	16.42	8.06	14.94	12.75	High	High	High	High	High	High	High	High	High	High	High	High	High	High	High	High	A2ARP8 [618-630]	A2ARP8 1xPhospho [S622(98.3)]	1.23	100	1	19.1	23.4	25.6
FALSE	High	[K].AMGDEDSGDSDTSPKPSPK.[V]	Q9D415	Disks large-associated protein 1 OS=Mus musculus GN=Dlgap1 PE=1 SV=3		0.258841	0.247967	0.0822364	0.0782249	-0.35	0.33	-0.55	0.54	0.787	1.257	0.681	1.453	12	15.3	15.1	10.4	16.56	7.59	17.92	21.67	High	High	High	High	High	High	High	High	High	High	High	High	High	High	High	High	Q9D415 [356-374]	Q9D415 2xPhospho [S362(100); S365(99.4)]	4.01	100	1	14.8	10.1	12.7
FALSE	High	[K].TDPACLETGQDSEDDSGEPEDWVPDPVDADPVK.[S]	Q8BZQ7	Anaphase-promoting complex subunit 2 OS=Mus musculus GN=Anapc2 PE=1 SV=2		0.869824	0.405173	0.987526	0.0784057	-0.11	-0.12	-0.01	-0.22	0.929	0.918	0.996	0.856	31.5	33.9	28.9	33.8	9.85	5.09	9.13	11.7	High	High	High	High	High	High	High	High	High	High	High	High	High	High	High	High	Q8BZQ7 [474-506]		1.75	100	1	28.8	30	33.1
FALSE	High	[R].SQSSSQFR.[S]	Q61151	Serine/threonine-protein phosphatase 2A 56 kDa regulatory subunit epsilon isoform OS=Mus musculus GN=Ppp2r5e PE=1 SV=3		0.997644	0.356384	0.656031	0.0786223	0	-0.17	0.21	-0.39	0.997	0.89	1.158	0.766	68	68.3	60.5	79.1	13.91	15.58	7.4	14.95	High	High	High	High	High	High	High	High	High	High	High	High	High	High	High	High	Q61151 [30-37]	Q61151 1xPhospho [S33(99.7)]	1.81	100	1	66.5	69.6	65.1
FALSE	High	[R].EQLMNSSLGSGTASLR.[S]	Q62108	Disks large homolog 4 OS=Mus musculus GN=Dlg4 PE=1 SV=1		0.724123	0.237913	0.983215	0.0791849	0.19	0.28	0.02	0.45	1.137	1.212	1.011	1.363	30.9	27.2	37.4	27.5	14.16	17.35	15.22	14.95	High	High	High	High	High	High	High	High	High	High	High	High	High	High	High	High	Q62108 [409-424]	Q62108 2xPhospho [S415(100); S418(100)]	4.59	100	1	34.6	35.4	27.3
FALSE	High	[K].ECVGSPDPDLEPGEAN.[-]	A2AEW9	GRIP1-associated protein 1 OS=Mus musculus GN=Gripap1 PE=1 SV=1		0.532737	0.631777	0.999574	0.0794985	-0.17	-0.13	0.01	-0.3	0.89	0.916	1.004	0.811	41.4	46.5	37.9	46.7	7.45	3.88	16.87	5.73	High	High	High	High	High	High	High	High	High	High	High	High	High	High	High	High	A2AEW9 [777-792]	A2AEW9 1xPhospho [S781(100)]	4.41	100	1	40.7	39.1	42.1
FALSE	High	[R].AAVPDAVGK.[C]	A0A0G2JGX4; Q8VDN2; D3YYN7	Sodium/potassium-transporting ATPase subunit alpha OS=Mus musculus GN=Atp1a3 PE=1 SV=1 Sodium/potassium-transporting ATPase subunit alpha-1 OS=Mus musculus GN=Atp1a1 PE=1 SV=1 Sodium/potassium-transporting ATPase subunit alpha OS=Mus musculus GN=Atp1a2 PE=1 SV=1	Shared	0.549665	0.013152	0.988651	0.0797555	-0.27	0.69	0.04	0.38	0.83	1.612	1.028	1.301	10.1	12.2	16.3	12.5	17.96	7.56	16.81	13.95	High	High	High	High	High	High	High	High	High	High	High	High	High	High	High	High	A0A0G2JGX4 [600-608]; Q8VDN2 [597-605]; D3YYN7 [594-602]		2.44	100	3	10.3	9.3	9.9
FALSE	High	[R].TGSVQTSPSSTPGTGR.[R]	D9HP81	Regulating synaptic membrane exocytosis 2 OS=Mus musculus GN=Rims2 PE=1 SV=1		0.944081	0.9982	0.251655	0.0802602	-0.12	0.03	0.25	-0.33	0.923	1.024	1.19	0.795	70.5	76.3	72.2	90.8	13.52	17.92	7.1	4.8	High	High	High	High	High	High	High	High	High	High	High	High	High	High	High	High	D9HP81 [1131-1146]	D9HP81 2xPhospho [S1133(99.2); S1137(99.2)]	3.05	100	1	67.9	73.1	67.1
FALSE	High	[R].GEGAQDEEEGGASSDATEGHDEDDEIYEGEYQGIPR.[A]	Q9JIS5	Synaptic vesicle glycoprotein 2A OS=Mus musculus GN=Sv2a PE=1 SV=1		0.906239	0.999339	0.195958	0.0806508	-0.12	0	0.6	-0.71	0.923	1	1.511	0.611	15.3	16.5	15.3	25	16.11	25.72	19.5	18.93	High	High	High	High	High	High	High	High	High	High	High	High	High	High	High	High	Q9JIS5 [68-103]		7.94	100	1	13.5	17.2	13.1
FALSE	High	[K].NKEESSEDEEKESEEEQPPKK.[T]	Q7TNV0	Protein DEK OS=Mus musculus GN=Dek PE=1 SV=1		0.992864	0.375838	0.878924	0.0809251	0.07	-0.29	0.2	-0.42	1.053	0.819	1.153	0.748	9.8	9.3	8	10.7	18.03	12.08	31.47	20.41	High	High	High	High	High	High	High	High	High	High	High	High	High	High	High	High	Q7TNV0 [243-263]	Q7TNV0 3xPhospho [S247(100); S248(100); S255(100)]	4.43	100	1	10.5	6.9	9.3
FALSE	High	[K].QDGAIENR.[N]	G5E829	Plasma membrane calcium-transporting ATPase 1 OS=Mus musculus GN=Atp2b1 PE=1 SV=1		0.446006	0.0259796	0.814553	0.0809682	0.16	-0.43	0.08	-0.34	1.121	0.741	1.054	0.788	15.5	13.8	11.4	14.5	6.23	16.82	17.55	10.66	High	High	High	High	High	High	High	High	High	High	High	High	High	High	High	High	G5E829 [313-320]		1.63	100	1	15.7	15.2	15.2
FALSE	High	[K].CDESPNREVQSSEAEALAR.[T]	Q5PR73	GTP-binding protein Di-Ras2 OS=Mus musculus GN=Diras2 PE=1 SV=1		0.953593	0.677522	0.732295	0.0811758	-0.03	-0.13	0.15	-0.31	0.98	0.912	1.109	0.806	30.8	31.5	28.1	34.9	10.08	16.18	7.97	11.12	High	High	High	High	High	High	High	High	High	High	High	High	High	High	High	High	Q5PR73 [123-141]	Q5PR73 1xPhospho [S126(100)]	1.88	100	1	33.2	28.6	28.4
FALSE	High	[KR].AASPSPQSVR.[R]	E9PUK6	Serine/arginine repetitive matrix protein 1 OS=Mus musculus GN=Srrm1 PE=1 SV=1		0.925518	0.947689	0.0927936	0.0818072	-0.01	0	0.33	-0.34	0.992	1.003	1.257	0.792	36	36.3	36.1	45.6	4.37	10.99	16.15	4.51	High	High	High	High	High	High	High	High	High	High	High	High	High	High	High	High	E9PUK6 [754-763]	E9PUK6 2xPhospho [S756(100); S758(100)]	2.48	100	1	33.5	37	36.4
FALSE	High	[R].RRTPSPPPR.[R]	E9PUK6	Serine/arginine repetitive matrix protein 1 OS=Mus musculus GN=Srrm1 PE=1 SV=1		0.489295	0.997526	0.519788	0.0822773	-0.09	0.03	0.14	-0.2	0.938	1.024	1.102	0.871	136.2	145.2	139.5	160.1	9.47	8.4	7.73	0.99	High	High	High	High	High	High	High	High	High	High	High	High	High	High	High	High	E9PUK6 [598-606]	E9PUK6 2xPhospho [T600(100); S602(100)]	3.11	100	1	141.4	125.7	155.6
FALSE	High	[R].VSEHSSPEEEASPHQR.[T]	Q60829	Protein phosphatase 1 regulatory subunit 1B OS=Mus musculus GN=Ppp1r1b PE=1 SV=2		0.461438	0.542299	0.996414	0.0841774	0.14	1.02	-0.11	1.28	1.104	2.03	0.925	2.423	32	29	65	26.8	64.33	24.49	35.11	10.76	High	High	High	High	High	High	High	High	High	High	High	High	High	High	High	High	Q60829 [41-56]	Q60829 1xPhospho [S46(100)]	6.61	100	1	85.9	30.6	33.5
FALSE	High	[R].ANSPPREFPPATAR.[E]	Q8BHL8	Proteasome inhibitor PI31 subunit OS=Mus musculus GN=Psmf1 PE=1 SV=1		0.996107	0.316969	0.712804	0.0848159	-0.01	-0.11	0.14	-0.26	0.995	0.928	1.106	0.835	20.2	20.3	18.8	22.5	15.66	12.5	14.59	4.29	High	High	High	High	High	High	High	High	High	High	High	High	High	High	High	High	Q8BHL8 [151-164]	Q8BHL8 1xPhospho [S153(100)]	1.33	100	1	18.3	18	24.8
FALSE	High	[K].VAELEEEQSQGSSSYSDWVK.[N]	A2ARP8	Microtubule-associated protein 1A OS=Mus musculus GN=Map1a PE=1 SV=1		0.999014	0.980982	0.0565465	0.0848275	0.04	-0.24	-0.54	0.34	1.026	0.849	0.688	1.265	31.4	30.6	26.6	21.1	14.38	15.1	26.96	12.95	High	High	High	High	High	High	High	High	High	High	High	High	High	High	High	High	A2ARP8 [344-363]	A2ARP8 3xPhospho [S355(99.4); S356(99.4); S359(100)]	4.87	100	1	34.4	31.7	31.1
FALSE	High	[R].SRAEGYEKTDDVSEKTSLADQEEVR.[T]	P70704	Phospholipid-transporting ATPase IA OS=Mus musculus GN=Atp8a1 PE=1 SV=2		0.982447	0.369333	0.564962	0.0858782	-0.3	0.43	-0.56	0.69	0.812	1.347	0.678	1.613	38.9	47.9	52.4	32.5	18.83	36.92	18.39	23.68	High	High	High	High	High	High	High	High	High	High	High	High	High	High	High	High	P70704 [13-37]	P70704 3xPhospho [S25(100); T28(100); S29(100)]	1.99	100	1	33.4	33.4	47.4
FALSE	High	[R].DRSGSSQSTSR.[R]	Q8BTI8	Serine/arginine repetitive matrix protein 2 OS=Mus musculus GN=Srrm2 PE=1 SV=3		0.993197	0.99158	0.0888135	0.0858946	0.19	-0.43	1.22	-1.46	1.142	0.743	2.328	0.365	14.2	12.4	10.6	29	50.94	47.05	47.49	15.4	High	High	High	High	High	High	High	High	High	High	High	High	High	High	High	High	Q8BTI8 [1745-1755]	Q8BTI8 2xPhospho [S1747(100); S1749(100)]	3.16	100	1	6	13.6	14.9
FALSE	High	[K].TSALLFSSDEEDQWNIADSHTK.[L]	A0A0N4SV74	WASH complex subunit FAM21 (Fragment) OS=Mus musculus GN=Fam21 PE=1 SV=1		0.0442088	0.00372432	0.624771	0.0865836	0.32	-0.46	0.12	-0.26	1.247	0.729	1.089	0.835	16.4	13.1	11.9	14.3	16.22	6.42	12.47	6.12	High	High	High	High	High	High	High	High	High	High	High	High	High	High	High	High	A0A0N4SV74 [607-628]	A0A0N4SV74 2xPhospho [S613(100); S614(100)]	3.8	100	1	20.9	16.9	14.4
FALSE	High	[K].EKTPSPKEEDEEAESPPEKK.[S]	A0A087WRY3	Nuclear ubiquitous casein and cyclin-dependent kinase substrate 1 OS=Mus musculus GN=Nucks1 PE=1 SV=1		0.540796	0.999533	0.65889	0.0875513	-0.14	-0.08	0.35	-0.57	0.907	0.945	1.276	0.672	30.4	33.5	28.7	42.8	14.37	17.42	29.68	11.03	High	High	High	High	High	High	High	High	High	High	High	High	High	High	High	High	A0A087WRY3 [199-218]	A0A087WRY3 3xPhospho [T201(100); S203(100); S213(100)]	3.16	100	1	29.3	31.6	31.7
FALSE	High	[K].ETPPGGNLSPAPR.[L]	G3UX48	Protein PRRC2A OS=Mus musculus GN=Prrc2a PE=1 SV=1		0.810268	0.771218	0.860478	0.0878003	-0.01	-0.23	0.17	-0.42	0.99	0.85	1.123	0.749	11.5	11.6	9.8	13	14.45	17.34	12.29	27.08	High	High	High	High	High	High	High	High	High	High	High	High	High	High	High	High	G3UX48 [939-951]	G3UX48 1xPhospho [S947(100)]	3.31	100	1	11	8.9	12.6
FALSE	High	[K].RVTNAISPESSPGVGR.[R]	Q9R0L6	Pericentriolar material 1 protein OS=Mus musculus GN=Pcm1 PE=1 SV=2		0.199012	0.61697	0.884101	0.087917	-0.38	-0.15	-0.06	-0.47	0.769	0.898	0.957	0.722	13.7	17.8	12.3	17	25.56	15.23	11.96	8.68	High	High	High	High	High	High	High	High	High	High	High	High	High	High	High	High	Q9R0L6 [59-74]	Q9R0L6 2xPhospho [S65(100); S/T]	2.13	100	1	10.9	13.3	14.1
FALSE	High	[K].TEGDSPAAALSPQMHQEPVQQDFSGK.[T]	Q8C8R3	Ankyrin-2 OS=Mus musculus GN=Ank2 PE=1 SV=2		0.588391	0.650798	0.0739244	0.0885246	0.3	-0.22	0.39	-0.31	1.232	0.86	1.313	0.807	37.9	30.8	32.6	40.4	12.28	14.12	9.53	9.75	High	High	High	High	High	High	High	High	High	High	High	High	High	High	High	High	Q8C8R3 [3682-3707]	Q8C8R3 1xPhospho [S3692(100)]	7.07	100	1	40	37.8	29.9
FALSE	High	[R].VPAASQSSGCYDSDSLELPRPEEGPSEDSGPGGLGSR.[A]	Q6NS60	F-box only protein 41 OS=Mus musculus GN=Fbxo41 PE=1 SV=3		0.982822	0.265675	0.717564	0.0886867	0.02	-0.41	0.1	-0.49	1.013	0.753	1.072	0.712	14.7	14.5	11.1	15.6	11.16	18.66	17.98	15.86	High	High	High	High	High	High	High	High	High	High	High	High	High	High	High	High	Q6NS60 [405-441]	Q6NS60 2xPhospho [S417(100); S419(100)]	6.66	100	1	15.2	15.2	11.8
FALSE	High	[R].AGDSDEESRTDDK.[G]	O88939	Zinc finger and BTB domain-containing protein 7A OS=Mus musculus GN=Zbtb7a PE=1 SV=2		0.650871	0.497161	1	0.0890076	-0.24	-0.22	-0.05	-0.4	0.85	0.861	0.967	0.756	9.9	11.7	8.5	11.3	25.01	6.13	17.16	13.93	High	High	High	High	High	High	High	High	High	High	High	High	High	High	High	High	O88939 [328-340]	O88939 1xPhospho [S331(100)]	1.31	100	1	11.3	13.6	7.9
FALSE	High	[R].DVMSDETNNEETESPSQEFVNITK.[Y]	P14873	Microtubule-associated protein 1B OS=Mus musculus GN=Map1b PE=1 SV=2		0.902936	0.920471	0.082513	0.0896728	-0.22	0.15	-0.48	0.42	0.86	1.11	0.715	1.335	7.8	9.1	8.7	6.5	8.77	29.29	13.55	21.5	High	High	High	High	High	High	High	High	High	High	High	High	High	High	High	High	P14873 [1138-1161]	P14873 2xPhospho [S1141(100); T1149(97.8)]	3.03	100	1	7.8	7.5	9.1
FALSE	High	[R].SNSQENVEASHPSQDGK.[R]	B2RUJ5	Amyloid beta A4 precursor protein-binding family A member 1 OS=Mus musculus GN=Apba1 PE=1 SV=2		0.27971	0.480231	0.871943	0.0911781	0.36	0.69	0.3	0.74	1.28	1.613	1.232	1.676	36.9	28.8	59.4	35.5	49.21	21.27	27.39	8.12	High	High	High	High	High	High	High	High	High	High	High	High	High	High	High	High	B2RUJ5 [571-587]	B2RUJ5 1xPhospho [S573(100)]	5.49	100	1	82.1	33.4	35
FALSE	High	[K].ADASSLTVDVTSPASK.[V]	Q99JX3	Golgi reassembly-stacking protein 2 OS=Mus musculus GN=Gorasp2 PE=1 SV=3		0.960138	0.102701	0.942098	0.0912834	0.05	-0.43	0.1	-0.48	1.036	0.74	1.073	0.715	16.7	16.2	12.4	17.3	8.69	13.56	13.09	18.92	High	High	High	High	High	High	High	High	High	High	High	High	High	High	High	High	Q99JX3 [407-422]	Q99JX3 1xPhospho [S418(99.6)]	2.9	100	1	16.5	15.3	17
FALSE	High	[R].TLSQSSESGTLPSGPPGHTMEVSC.[-]	Q9QYG0	Protein NDRG2 OS=Mus musculus GN=Ndrg2 PE=1 SV=1		0.799568	0.275662	0.996669	0.0919647	0.13	0.14	0.07	0.2	1.093	1.104	1.048	1.151	60	54.9	66.2	57.6	12.06	6.79	7.19	8.5	High	High	High	High	High	High	High	High	High	High	High	High	High	High	High	High	Q9QYG0 [348-371]	Q9QYG0 1xPhospho [S350(100)]	7.31	100	1	65.3	50.1	56.2
FALSE	High	[K].VCSSMDENDGPGEGDELGRR.[H]	Q9JLM8	Serine/threonine-protein kinase DCLK1 OS=Mus musculus GN=Dclk1 PE=1 SV=1		0.985693	0.233691	0.792603	0.0928443	0.1	-0.23	0.24	-0.38	1.069	0.852	1.183	0.77	139	129.9	118.4	153.7	14.47	15.29	11.31	7.89	High	High	High	High	High	High	High	High	High	High	High	High	High	High	High	High	Q9JLM8 [361-380]		3.85	100	1	132.9	169.3	121.2
FALSE	High	[R].TVSDNSLSSSKEGKPELR.[F]	A2AQ43	Formin-binding protein 1 OS=Mus musculus GN=Fnbp1 PE=1 SV=1		0.999999	0.956143	0.204469	0.0929191	0.1	0.19	-0.44	0.74	1.074	1.144	0.735	1.671	18.7	17.4	21.4	12.8	23.34	23.07	23.47	14.9	High	High	High	High	High	High	High	High	High	High	High	High	High	High	High	High	A2AQ43 [294-311]	A2AQ43 3xPhospho [S299(98.6); S301(95.1); T/S]	1.78	100	1	21.8	19.3	18.1
FALSE	High	[R].GPAGEASASPPVRR.[V]	Q61235	Beta-2-syntrophin OS=Mus musculus GN=Sntb2 PE=1 SV=2		0.898834	0.981778	0.157823	0.0939158	-0.1	0.12	0.4	-0.39	0.933	1.084	1.321	0.765	8.7	9.3	9.4	12.3	12.96	4.85	22.48	13.06	High	High	High	High	High	High	High	High	High	High	High	High	High	High	High	High	Q61235 [82-95]		1.12	100	1	9	8.4	10.3
FALSE	High	[K].TARPNSEAPLSGSEDADDSNKLSK.[K]	Q05D44	Eukaryotic translation initiation factor 5B OS=Mus musculus GN=Eif5b PE=1 SV=2		0.994621	0.997683	0.187086	0.0941407	-0.03	-0.03	0.27	-0.33	0.98	0.981	1.207	0.796	23.7	24.2	23.3	29.2	16.81	14.2	6.43	9.34	High	High	High	High	High	High	High	High	High	High	High	High	High	High	High	High	Q05D44 [127-150]	Q05D44 2xPhospho [S137(98.9); S145(98.9)]	2.66	100	1	19.9	24.1	23.4
FALSE	High	[R].GLMAGGRPEGQYSEDEDTDTEEYREAK.[A]	Q3TIR3	Synembryn-A OS=Mus musculus GN=Ric8a PE=1 SV=2		0.812185	0.579581	0.976309	0.0946946	0.24	0.22	-0.16	0.63	1.184	1.168	0.894	1.546	21	17.8	24.5	15.9	28.73	12.66	29.22	16.7	High	High	High	High	High	High	High	High	High	High	High	High	High	High	High	High	Q3TIR3 [423-449]	Q3TIR3 2xPhospho [S435(98.1); T440(99.9)]	2.73	100	1	13	21.2	27.5
FALSE	High	[K].SASAHNLSSEK.[K]	Q8C419	Probable G-protein coupled receptor 158 OS=Mus musculus GN=Gpr158 PE=1 SV=2		0.398321	0.967261	0.513449	0.0947321	0.56	-0.09	-0.34	0.81	1.475	0.939	0.791	1.753	39.7	26.9	37.3	21.3	43.7	36.41	15.51	18.4	High	High	High	High	High	High	High	High	High	High	High	High	High	High	High	High	Q8C419 [879-889]		2.5	100	1	62.7	29	54.4
FALSE	High	[K].RSSDGSLSHEDLAK.[V]	B2RXQ2	Ppfia1 protein OS=Mus musculus GN=Ppfia1 PE=1 SV=1		0.757027	0.688694	0.0777428	0.095356	0.1	-0.21	-0.42	0.32	1.074	0.865	0.745	1.245	22.2	20.7	19.2	15.4	5.62	21.92	11.29	9.51	High	High	High	High	High	High	High	High	High	High	High	High	High	High	High	High	B2RXQ2 [237-250]		2.03	100	1	22.6	22.8	21.7
FALSE	High	[K].WVHFSDASPEHVTPELTPR.[E]	Q8VD37	SH3-containing GRB2-like protein 3-interacting protein 1 OS=Mus musculus GN=Sgip1 PE=1 SV=1		0.998169	0.491704	0.579081	0.0955897	0.05	0.16	-0.14	0.34	1.033	1.114	0.906	1.27	59.3	57.4	66.1	52.1	15.06	9.6	13.95	5.2	High	High	High	High	High	High	High	High	High	High	High	High	High	High	High	High	Q8VD37 [312-330]	Q8VD37 3xPhospho [S316(100); S319(100); T324(100)]	6.66	100	1	62.5	56.3	63.8
FALSE	High	[K].EVSSKEEQSPVKAEVAEK.[Q]	P14873	Microtubule-associated protein 1B OS=Mus musculus GN=Map1b PE=1 SV=2		0.989808	0.360205	0.938439	0.0957384	-0.12	-0.25	0.01	-0.38	0.917	0.841	1.007	0.766	50.3	54.8	42.3	55.2	13.84	16.62	10.34	14.46	High	High	High	High	High	High	High	High	High	High	High	High	High	High	High	High	P14873 [606-623]	P14873 1xPhospho [S614(100)]	1.7	100	1	59.7	53	47.7
FALSE	High	[K].KYSDVEVPASVTGHSFASDGDSGTCSPLR.[H]	Q9QYC0; F8WGR0	Alpha-adducin OS=Mus musculus GN=Add1 PE=1 SV=2 Alpha-adducin OS=Mus musculus GN=Add1 PE=1 SV=1	Shared	0.976542	0.664641	0.741107	0.0967527	-0.08	0.44	-0.25	0.62	0.947	1.361	0.84	1.534	24.2	25.5	32.9	21.4	33.29	11.59	21.07	9.98	High	High	High	High	High	High	High	High	High	High	High	High	High	High	High	High	Q9QYC0 [406-434]; F8WGR0 [406-434]	Q9QYC0 3xPhospho [S423(98); S427(99); T/S/Y]; F8WGR0 3xPhospho [S423(98); S427(99); T/S/Y]	2.67	100	2	39.6	19.6	26.9
FALSE	High	[R].GPSPLVTMTPAVPAVTPVDEESSDGEPDQEAVQR.[Y-]	E9PU87	Serine/threonine-protein kinase SIK3 OS=Mus musculus GN=Sik3 PE=1 SV=1		0.997334	0.699862	0.583523	0.0967657	-0.06	0.44	-0.45	0.83	0.961	1.357	0.731	1.783	8.1	8.4	11	6.2	31.9	26.73	9.48	44.64	High	High	High	High	High	High	High	High	High	High	High	High	High	High	High	High	E9PU87 [570-603]	E9PU87 2xPhospho [S591(100); S592(100)]	7.85	100	1	7.8	7	8.4
FALSE	High	[K].TPPSNLSPIEDASPTEELR.[Q]	O88737; Q9QYX7	Protein bassoon OS=Mus musculus GN=Bsn PE=1 SV=4 Protein piccolo OS=Mus musculus GN=Pclo PE=1 SV=4	Shared	0.595567	0.997975	0.477026	0.0967941	-0.09	0.02	0.16	-0.23	0.941	1.011	1.116	0.852	87	92.4	87.9	103.2	9.3	9	6.33	10.1	High	High	High	High	High	High	High	High	High	High	High	High	High	High	High	High	O88737 [1102-1120]; Q9QYX7 [1760-1778]	O88737 2xPhospho [S1108(100); S1114(99.6)]; Q9QYX7 2xPhospho [S1766(100); S1772(99.6)]	7.19	100	2	95.4	91.6	82.6
FALSE	High	[R].SRTLSQSSESGTLPSGPPGHTMEVSC.[-]	Q9QYG0	Protein NDRG2 OS=Mus musculus GN=Ndrg2 PE=1 SV=1		0.802747	0.685337	0.945109	0.0980018	0.15	0.2	-0.14	0.49	1.108	1.148	0.908	1.402	27.6	24.9	31.7	22.6	6.84	24.46	7.64	17.74	High	High	High	High	High	High	High	High	High	High	High	High	High	High	High	High	Q9QYG0 [346-371]	Q9QYG0 2xPhospho [T348(100); S350(100)]	5.35	100	1	26.9	28.4	24.9
FALSE	High	[K].ARVDHGAEIITQSPSR.[S]	P20357	Microtubule-associated protein 2 OS=Mus musculus GN=Map2 PE=1 SV=2		0.971188	0.722115	0.259169	0.0984905	0.06	-0.14	0.48	-0.56	1.045	0.906	1.391	0.68	56.6	54.1	51.3	75.3	37.03	20.65	6.01	13.66	High	High	High	High	High	High	High	High	High	High	High	High	High	High	High	High	P20357 [1771-1786]	P20357 1xPhospho [S1783(99.7)]	3.15	100	1	43.7	54.6	58.6
FALSE	High	[R].TSPGEER.[G]	Q3UGX2	Spectrin beta 1 OS=Mus musculus GN=Sptb PE=1 SV=1		0.460171	0.224644	0.229357	0.0985167	0.59	-0.51	0.71	-0.63	1.502	0.701	1.63	0.646	21.5	14.3	15.1	23.3	17.93	41.48	8.69	33.69	High	High	High	High	High	High	High	High	High	High	High	High	High	High	High	High	Q3UGX2 [2113-2119]	Q3UGX2 1xPhospho [S2114(100)]	2.03	100	1	22.4	27.2	20.7
FALSE	High	[R].RRGSGQDLAGPAPETLEQTEGATP.[-]	E9Q0W7	Phosphodiesterase OS=Mus musculus GN=Pde7b PE=1 SV=1		0.780044	0.981396	0.613487	0.099305	0.25	0.18	-0.22	0.65	1.185	1.132	0.858	1.564	62.2	52.5	70.5	45.1	22.36	14.18	22.45	15.51	High	High	High	High	High	High	High	High	High	High	High	High	High	High	High	High	E9Q0W7 [475-498]	E9Q0W7 1xPhospho [S478(100)]	5.89	100	1	76	58	66.7
FALSE	High	[K].NTGASSGATSEESTEAEFCR.[I]	A0A1B0GRA5	Stromal interaction molecule 1 OS=Mus musculus GN=Stim1 PE=1 SV=1		0.675683	0.744072	0.0812153	0.0993729	0.25	-0.17	0.63	-0.55	1.189	0.89	1.549	0.683	13.4	11.3	11.9	17.5	11.43	31.9	20.14	16.1	High	High	High	High	High	High	High	High	High	High	High	High	High	High	High	High	A0A1B0GRA5 [31-50]	A0A1B0GRA5 1xPhospho [S40(99.5)]	4.74	100	1	13.7	13.1	15.8
FALSE	High	[R].VVETQWDVSSAASPESPEECARPEEPASPEDPPSR.[H]	Q8BNW9	Kelch repeat and BTB domain-containing protein 11 OS=Mus musculus GN=Kbtbd11 PE=1 SV=3		0.940192	0.103189	0.946109	0.0996244	-0.03	0.54	-0.09	0.61	0.978	1.458	0.937	1.522	17.3	17.7	25.2	16.5	12.07	26.11	21.46	12.55	High	High	High	High	High	High	High	High	High	High	High	High	High	High	High	High	Q8BNW9 [80-114]	Q8BNW9 3xPhospho [S89(95.3); S95(99.9); S107(97.6)]	5.27	100	1	15.7	15.4	19.3
FALSE	High	[R].TVSVEGDAPGSDLSTAVDSPGSQPPYR.[L]	A4GZ26	ARF6 guanine nucleotide exchange factor IQArfGEF OS=Mus musculus GN=Iqsec2 PE=1 SV=1		0.49345	0.57464	0.0807635	0.100254	-0.42	0.4	-0.8	0.77	0.746	1.315	0.576	1.705	6.8	9.1	8.9	5.2	16.63	21.27	24.61	18.28	High	High	High	High	High	High	High	High	High	High	High	High	High	High	High	High	A4GZ26 [244-270]	A4GZ26 2xPhospho [S246(100); S262(100)]	3.89	94	1	8.6	6.1	7.4
FALSE	High	[R].RESDESGESAPEEGGEGAR.[A]	Q3ZAQ4	Autophagy 9-like 1 protein OS=Mus musculus GN=Atg9a PE=1 SV=1		0.82216	0.809572	0.104706	0.1004	0.23	-0.31	0.5	-0.58	1.171	0.808	1.411	0.67	9.1	7.8	7.4	11	21.87	12.08	32.72	6.92	High	High	High	High	High	High	High	High	High	High	High	High	High	High	High	High	Q3ZAQ4 [733-751]	Q3ZAQ4 1xPhospho [S735(100)]	6.02	100	1	10.2	8.8	5.9
FALSE	High	[R].QRSHSAGEVGEDSR.[H]	Q6I6G8	E3 ubiquitin-protein ligase HECW2 OS=Mus musculus GN=Hecw2 PE=1 SV=1		0.887221	0.083733	0.926804	0.100547	-0.02	-0.24	0.09	-0.34	0.987	0.848	1.063	0.788	26.1	26.5	22.2	28.1	14.58	10.36	11.39	17.17	High	High	High	High	High	High	High	High	High	High	High	High	High	High	High	High	Q6I6G8 [1044-1057]	Q6I6G8 2xPhospho [S1046(100); S1048(100)]	3.11	100	1	25.2	26.3	25.9
FALSE	High	[K].LVTGDRNNSSCR.[N]	P23242	Gap junction alpha-1 protein OS=Mus musculus GN=Gja1 PE=1 SV=2		0.981923	0.977268	0.106517	0.101235	-0.14	0.03	-0.5	0.39	0.907	1.022	0.709	1.309	24.1	26.6	24.7	18.8	20.81	16.84	22.1	23.35	High	High	High	High	High	High	High	High	High	High	High	High	High	High	High	High	P23242 [288-299]	P23242 1xPhospho [S296(100)]	1.58	100	1	26	19.4	31.3
FALSE	High	[R].EQLMNSSLGSGTASLRSNPK.[R]	Q62108	Disks large homolog 4 OS=Mus musculus GN=Dlg4 PE=1 SV=1		0.968915	0.545673	0.395652	0.101748	0.01	0.29	-0.39	0.69	1.005	1.222	0.763	1.609	12	11.9	14.6	9.1	37.48	16.1	16.43	9.23	High	High	High	High	High	High	High	High	High	High	High	High	High	High	High	High	Q62108 [409-428]	Q62108 3xPhospho [S415(100); S418(98.8); S425(98.8)]	4.93	100	1	11.1	17.1	12.9
FALSE	High	[R].IEDSEPHIPLIDDTDAEDDAPTKR.[N]	G5E829	Plasma membrane calcium-transporting ATPase 1 OS=Mus musculus GN=Atp2b1 PE=1 SV=1		0.997733	0.999966	0.0697759	0.102132	-0.07	-0.06	-0.63	0.49	0.949	0.957	0.646	1.407	59.9	63.1	57.3	40.8	21.17	19.09	24.45	16.62	High	High	High	High	High	High	High	High	High	High	High	High	High	High	High	High	G5E829 [1152-1175]	G5E829 1xPhospho [T1165(100)]	5.95	100	1	67.9	52.8	70.2
FALSE	High	[K].VENMSSNQDGNDSDEFM.[-]	Q78PG9	Coiled-coil domain-containing protein 25 OS=Mus musculus GN=Ccdc25 PE=1 SV=1		0.918967	0.134557	0.852278	0.102345	0.14	-0.25	0.06	-0.17	1.103	0.841	1.042	0.89	82.1	74.4	69	77.6	11.58	4.89	7.64	5.52	High	High	High	High	High	High	High	High	High	High	High	High	High	High	High	High	Q78PG9 [192-208]	Q78PG9 1xPhospho [S204(100)]	3.66	100	1	64.4	81.7	82.5
FALSE	High	[R].ETTVASDSEEEAGKEESSVK.[K]	Q8C1D8	Protein IWS1 homolog OS=Mus musculus GN=Iws1 PE=1 SV=1		0.959759	0.914774	0.521702	0.103668	0.02	0.13	-0.11	0.27	1.015	1.096	0.924	1.202	35.1	34.6	38.5	32	17.11	7.78	4.81	16.21	High	High	High	High	High	High	High	High	High	High	High	High	High	High	High	High	Q8C1D8 [379-398]	Q8C1D8 2xPhospho [S384(100); S386(100)]	3.62	100	1	45.2	36	34.2
FALSE	High	[R].SLSESYELSSDLQDK.[Q]	E9PUA3	IQ motif and SEC7 domain-containing protein 1 OS=Mus musculus GN=Iqsec1 PE=1 SV=1		0.567547	0.158294	0.425054	0.104355	0.22	-0.51	0.31	-0.61	1.162	0.702	1.243	0.657	9.7	8.3	6.8	10.4	17.5	13.57	41.29	13.04	High	High	High	High	High	High	High	High	High	High	High	High	High	High	High	High	E9PUA3 [90-104]	E9PUA3 1xPhospho [S92(99.7)]	2.88	100	1	8.7	12.6	9
FALSE	High	[K].SATSSSPGSPIHSLETSL.[-]	Q3UHH0; G5E829	Calcium-transporting ATPase OS=Mus musculus GN=Atp2b2 PE=1 SV=1 Plasma membrane calcium-transporting ATPase 1 OS=Mus musculus GN=Atp2b1 PE=1 SV=1	Shared	0.925711	0.332957	0.99886	0.105375	0.2	0.57	0.12	0.65	1.151	1.481	1.088	1.567	24.8	21.5	36.7	23.4	39.65	20.77	21.06	12.5	High	High	High	High	High	High	High	High	High	High	High	High	High	High	High	High	Q3UHH0 [1177-1194]; G5E829 [1203-1220]		5.6	100	2	42.3	26.8	17.1
FALSE	High	[R].SRSSSVTSIDKESR.[E]	D3Z079	Syntaxin-binding protein 5 OS=Mus musculus GN=Stxbp5 PE=1 SV=1		0.928517	0.99286	0.390091	0.106473	0.06	0.08	-0.22	0.35	1.041	1.058	0.861	1.278	31.2	29.9	33	25.8	17.08	6.55	12.92	20.13	High	High	High	High	High	High	High	High	High	High	High	High	High	High	High	High	D3Z079 [743-756]	D3Z079 3xPhospho [S745(97.6); S747(98.8); S750(98.7)]	2.58	100	1	34.3	27.9	39.7
FALSE	High	[K].ETRTSSESIVSVPASSTSGSPSR.[V]	D3Z0Y4	Actin-binding LIM protein 2 OS=Mus musculus GN=Ablim2 PE=1 SV=1		0.97736	0.720994	0.29243	0.106597	-0.08	0	0.23	-0.31	0.948	1.002	1.177	0.807	34.7	36.6	34.7	43	17.97	9.27	7.17	9.12	High	High	High	High	High	High	High	High	High	High	High	High	High	High	High	High	D3Z0Y4 [32-54]	D3Z0Y4 2xPhospho [S51(95.1); T/S]	4.39	100	1	34.6	34.7	34.1
FALSE	High	[R].SSIEPK.[T]	Q8BTI8	Serine/arginine repetitive matrix protein 2 OS=Mus musculus GN=Srrm2 PE=1 SV=3		0.589847	0.998779	0.530829	0.10674	-0.18	-0.03	0.15	-0.35	0.883	0.982	1.107	0.784	27.4	31	26.9	34.3	12.68	10.79	13.29	6.37	High	High	High	High	High	High	High	High	High	High	High	High	High	High	High	High	Q8BTI8 [1630-1635]	Q8BTI8 1xPhospho [S1631(99.7)]	1.38	100	1	23.5	27.7	27.1
FALSE	High	[R].GSPPPSPCQTQD.[-]	Q7TNV1	Protein FAM57B OS=Mus musculus GN=Fam57b PE=2 SV=2		0.999171	0.626341	0.657714	0.107366	0.02	-0.19	0.36	-0.54	1.012	0.876	1.287	0.689	16.3	16.1	14.2	20.7	15.64	19.88	8.83	17.73	High	High	High	High	High	High	High	High	High	High	High	High	High	High	High	High	Q7TNV1 [264-275]	Q7TNV1 1xPhospho [S265(100)]	2.43	100	1	16.6	15.9	14.7
FALSE	High	[R].RSPSPAAMSER.[L]	A2A6P4	Protein Fam104a OS=Mus musculus GN=Fam104a PE=1 SV=1		0.9932	0.375244	0.695678	0.107596	0.06	-0.26	0.19	-0.39	1.04	0.834	1.139	0.762	11	10.6	9.2	12.1	10.96	22.21	25.73	23.18	High	High	High	High	High	High	High	High	High	High	High	High	High	High	High	High	A2A6P4 [61-71]	A2A6P4 2xPhospho [S62(100); S64(100)]	1.54	100	1	10.5	13.3	11.4
FALSE	High	[K].VSEEDQSLENSEADVKESR.[K]	A2AJ26	ATP-binding cassette sub-family A member 2 OS=Mus musculus GN=Abca2 PE=1 SV=1		0.948485	0.878411	0.150349	0.107824	-0.28	0.28	-0.7	0.7	0.824	1.212	0.614	1.626	11.7	14.2	14.2	8.7	21.67	20.82	13.71	41.5	High	High	High	High	High	High	High	High	High	High	High	High	High	High	High	High	A2AJ26 [1320-1338]	A2AJ26 2xPhospho [S1330(100); S]	2.15	100	1	9.2	10.7	15.1
FALSE	High	[K].ITSVSTGNLCTEEQSPPPRPEAYPIPTQTYTR.[E]	E9Q852	Protein Afdn OS=Mus musculus GN=Afdn PE=1 SV=2		0.549168	0.967468	0.407999	0.108332	0.38	0.07	-0.5	0.94	1.3	1.047	0.709	1.92	8.8	6.8	9.2	4.8	16.17	15.27	24.01	46.92	High	High	High	High	High	High	High	High	High	High	High	High	High	High	High	High	E9Q852 [1182-1213]	E9Q852 2xPhospho [S1186(98.8); S1196(100)]	5.34	100	1	8.2	9.4	7.9
FALSE	High	[R].ASIKSTKVDGASYFR.[H]	A0A087WS83	Voltage-dependent R-type calcium channel subunit alpha OS=Mus musculus GN=Cacna1e PE=1 SV=1		0.999688	0.723594	0.439918	0.108813	0.1	0.13	-0.34	0.57	1.072	1.096	0.792	1.484	38.4	35.8	42.1	28.3	19.49	17.62	16.77	34.81	High	High	High	High	High	High	High	High	High	High	High	High	High	High	High	High	A0A087WS83 [446-460]	A0A087WS83 2xPhospho [S447(100); S450(98.9)]	1.69	100	1	46.6	28.7	39.9
FALSE	High	[R].AGDVLEDSPK.[R]	P51859	Hepatoma-derived growth factor OS=Mus musculus GN=Hdgf PE=1 SV=2		0.999095	0.215902	0.940746	0.109481	0.02	-0.27	0.05	-0.3	1.015	0.828	1.034	0.813	13.1	12.9	10.9	13.4	15.31	13.88	14.69	20.1	High	High	High	High	High	High	High	High	High	High	High	High	High	High	High	High	P51859 [158-167]	P51859 1xPhospho [S165(100)]	3.56	100	1	13.9	15.1	12.4
FALSE	High	[R].GDSIGSSK.[G]	F6Z9T5	R3H domain-containing protein 2 (Fragment) OS=Mus musculus GN=R3hdm2 PE=1 SV=1		0.997926	0.967411	0.289337	0.10968	0.17	-0.02	-0.85	1.01	1.129	0.987	0.553	2.013	11.7	10.4	11.6	5.7	39.84	23.62	21.11	38.76	High	High	High	High	High	High	High	High	High	High	High	High	High	High	High	High	F6Z9T5 [124-131]	F6Z9T5 1xPhospho [S126(100)]	1.89	100	1	10.6	12.9	15.8
FALSE	High	[R].SGDETPGSEAPGDKAVEEQGDDQDSEK.[S]	Q00PI9	Heterogeneous nuclear ribonucleoprotein U-like protein 2 OS=Mus musculus GN=Hnrnpul2 PE=1 SV=2		0.991656	0.763711	0.615041	0.110049	-0.09	0.35	-0.68	0.94	0.941	1.274	0.625	1.917	20	21.3	25.5	13.3	14.77	25.23	23.1	28.75	High	High	High	High	High	High	High	High	High	High	High	High	High	High	High	High	Q00PI9 [159-185]	Q00PI9 2xPhospho [T163(100); S166(100)]	2.79	100	1	22.5	18.4	21.8
FALSE	High	[R].YNDWSDDDDDSNESK.[S]	Q8BHS6	Armadillo repeat-containing X-linked protein 3 OS=Mus musculus GN=Armcx3 PE=1 SV=1		0.991921	0.949962	0.1647	0.110138	-0.08	0.07	-0.23	0.22	0.945	1.05	0.853	1.163	59.5	62.9	62.4	53.7	7.95	8.53	7.49	12.28	High	High	High	High	High	High	High	High	High	High	High	High	High	High	High	High	Q8BHS6 [57-71]	Q8BHS6 2xPhospho [S61(100); S67(99.3)]	2.4	100	1	60.2	68.3	57.5
FALSE	High	[R].GGSAPEGAAYAAPR.[G]	O35927	Catenin delta-2 OS=Mus musculus GN=Ctnnd2 PE=1 SV=1		0.763267	0.841755	0.143466	0.1116	0.26	-0.17	-0.36	0.45	1.201	0.886	0.779	1.367	17.9	14.9	15.8	11.6	19.52	7.29	15.36	16.03	High	High	High	High	High	High	High	High	High	High	High	High	High	High	High	High	O35927 [280-293]	O35927 1xPhospho [S282(100)]	3.76	100	1	19.7	18.8	16.9
FALSE	High	[K].IAELEEERSQGSTSNSDWMK.[N]	P14873	Microtubule-associated protein 1B OS=Mus musculus GN=Map1b PE=1 SV=2		0.87138	0.999822	0.386228	0.111814	0.3	-0.01	-0.66	0.95	1.235	0.991	0.633	1.934	44.4	36	44.1	22.8	31.94	35.26	24.66	9.12	High	High	High	High	High	High	High	High	High	High	High	High	High	High	High	High	P14873 [328-347]	P14873 3xPhospho [S336(100); S339(98.8); S343(100)]	4.85	100	1	51.1	43.7	45.1
FALSE	High	[R].VSEHSSPEEEASPHQR.[T]	Q60829	Protein phosphatase 1 regulatory subunit 1B OS=Mus musculus GN=Ppp1r1b PE=1 SV=2		0.350039	0.794752	0.998436	0.111901	0.23	0.75	0.08	0.9	1.172	1.682	1.058	1.863	111.6	95.2	187.6	100.7	47.06	11.17	30.7	14.46	High	High	High	High	High	High	High	High	High	High	High	High	High	High	High	High	Q60829 [41-56]	Q60829 2xPhospho [S45(100); S46(100)]	6.45	100	1	244.5	112.1	111
FALSE	High	[R].QAQDLARSYGIPYIETSAKTRQGVEDAFYTLVR.[E]	Q61411	GTPase HRas OS=Mus musculus GN=Hras PE=1 SV=2		0.994954	0.692017	0.405443	0.112914	0.04	-0.11	0.18	-0.25	1.029	0.926	1.134	0.84	15.9	15.5	14.7	17.5	16.55	8.44	8.85	10.61	High	High	High	High	High	High	High	High	High	High	High	High	High	High	High	High	Q61411 [129-161]		1.65	100	1	19.8	13.7	14.8
FALSE	High	[K].AVEEQGDDQDSEKSKPAGSDGER.[R]	Q00PI9	Heterogeneous nuclear ribonucleoprotein U-like protein 2 OS=Mus musculus GN=Hnrnpul2 PE=1 SV=2		0.99985	0.997358	0.137122	0.113163	-0.01	-0.09	0.24	-0.34	0.994	0.938	1.181	0.79	23.1	23.2	21.7	27.4	13.33	9.66	9.42	13.39	High	High	High	High	High	High	High	High	High	High	High	High	High	High	High	High	Q00PI9 [173-195]	Q00PI9 2xPhospho [S191(100); S]	2.46	100	1	24.7	25.5	21.6
FALSE	High	[K].EADEEDSDEETSYPER.[S]	D3Z316	Protein 1700021F05Rik OS=Mus musculus GN=1700021F05Rik PE=1 SV=1		0.999534	0.527585	0.640035	0.1139	0.03	-0.24	0.16	-0.38	1.019	0.847	1.12	0.77	22.7	22.3	19.3	25	7.42	13.41	18.92	13.2	High	High	High	High	High	High	High	High	High	High	High	High	High	High	High	High	D3Z316 [100-115]	D3Z316 1xPhospho [S106(100)]	5.57	100	1	24.1	23.6	20.5
FALSE	High	[K].LAAGAESPQPASGNSPSEDDR.[S]	P16054	Protein kinase C epsilon type OS=Mus musculus GN=Prkce PE=1 SV=1		0.878875	0.0387131	0.999558	0.113909	0.09	-0.34	0.04	-0.28	1.067	0.79	1.026	0.822	26.4	24.8	20.9	25.4	8.08	5.66	12.59	6.71	High	High	High	High	High	High	High	High	High	High	High	High	High	High	High	High	P16054 [323-343]	P16054 2xPhospho [S329(100); S337(99.5)]	4.71	100	1	25.6	28.6	23.6
FALSE	High	[R].SSEGIPR.[S]	Q80YN3	Breast carcinoma-amplified sequence 1 homolog OS=Mus musculus GN=Bcas1 PE=1 SV=3		0.943266	0.419251	0.986609	0.114244	-0.04	-0.3	0.07	-0.41	0.974	0.811	1.051	0.752	37.1	38.1	30.1	40	14.92	20.62	17.35	4.87	High	High	High	High	High	High	High	High	High	High	High	High	High	High	High	High	Q80YN3 [497-503]	Q80YN3 1xPhospho [S497(99.7)]	1.83	100	1	29.5	41.2	40
FALSE	High	[R].SADVSPTTEGVKR.[R]	Q9ESN6	Tripartite motif-containing protein 2 OS=Mus musculus GN=Trim2 PE=1 SV=1		0.838027	0.977961	0.610948	0.114918	0.04	0.16	-0.27	0.46	1.026	1.118	0.832	1.379	43.5	42.4	48.7	35.3	18.8	13.77	14.89	7.69	High	High	High	High	High	High	High	High	High	High	High	High	High	High	High	High	Q9ESN6 [424-436]	Q9ESN6 2xPhospho [S424(100); S428(100)]	1.5	100	1	58	43.9	43.1
FALSE	High	[R].RLSVGSSMR.[T]	Q8CGA3	Large neutral amino acids transporter small subunit 4 OS=Mus musculus GN=Slc43a2 PE=1 SV=1		0.325989	0.77004	0.0284365	0.11515	-0.74	0.33	-1.04	0.63	0.599	1.255	0.486	1.547	17.7	29.6	22.3	14.4	40.95	32.93	19.58	23.38	High	High	High	High	High	High	High	High	High	High	High	High	High	High	High	High	Q8CGA3 [272-280]	Q8CGA3 2xPhospho [S274(99.7); S]	1.98	100	1	29.7	14.5	21.7
FALSE	High	[R].SSPQLDPLR.[K]	Q8K2F8	Protein LSM14 homolog A OS=Mus musculus GN=Lsm14a PE=1 SV=1		0.999952	0.835271	0.422711	0.115499	-0.08	-0.09	0.16	-0.33	0.947	0.941	1.12	0.796	28.5	30.1	26.8	33.7	7.73	16.55	11.28	12.3	High	High	High	High	High	High	High	High	High	High	High	High	High	High	High	High	Q8K2F8 [182-190]	Q8K2F8 1xPhospho [S183(99.7)]	1.45	100	1	27.5	28.7	28.2
FALSE	High	[K].VDGPDVALKDSDQVAQSDGEESPAAEEQLLGER.[I]	Q3UPL0	Protein transport protein Sec31A OS=Mus musculus GN=Sec31a PE=1 SV=2		0.982703	0.994764	0.291813	0.115562	0.13	0.12	-0.47	0.73	1.095	1.09	0.72	1.658	8.1	7.4	8.8	5.3	16.5	23.23	19.34	32.22	High	High	High	High	High	High	High	High	High	High	High	High	High	High	High	High	Q3UPL0 [510-542]	Q3UPL0 2xPhospho [S526(100); S531(100)]	7.88	100	1	6.3	9.3	7.5
FALSE	High	[K].IRDTSQEPCGR.[L]	S4R2S8; A0A087WNU5	Ankyrin-3 OS=Mus musculus GN=Ank3 PE=1 SV=1 Ankyrin-3 (Fragment) OS=Mus musculus GN=Ank3 PE=1 SV=1	Shared	0.991837	0.314743	0.785166	0.116141	-0.07	0.35	-0.17	0.45	0.955	1.274	0.889	1.37	32.1	33.6	41	29.9	6.52	13.56	16.97	9.85	High	High	High	High	High	High	High	High	High	High	High	High	High	High	High	High	S4R2S8 [1362-1372]; A0A087WNU5 [120-130]	S4R2S8 1xPhospho [S1366(99.6)]; A0A087WNU5 1xPhospho [S124(99.6)]	2.12	100	2	33.7	34.5	30.7
FALSE	High	[K].LTFDSSFSPNTGK.[K]	F2Z471; Q60932	Voltage-dependent anion-selective channel protein 1 OS=Mus musculus GN=Vdac1 PE=1 SV=1 Voltage-dependent anion-selective channel protein 1 OS=Mus musculus GN=Vdac1 PE=1 SV=3	Shared	0.934766	0.996276	0.208097	0.116262	0.02	-0.02	0.43	-0.42	1.013	0.989	1.345	0.745	13.1	12.9	13	17.4	13.25	20.25	20.26	15.02	High	High	High	High	High	High	High	High	High	High	High	High	High	High	High	High	F2Z471 [97-109]; Q60932 [110-122]	F2Z471 1xPhospho [S104(100)]; Q60932 1xPhospho [S117(100)]	3.38	100	2	14.7	10.9	12.3
FALSE	High	[K].EKSPPDQSAVPNTPPSTPVKLEEDLPQEPTSR.[D]	Q9QYC0	Alpha-adducin OS=Mus musculus GN=Add1 PE=1 SV=2		0.948005	0.369539	0.994906	0.116305	-0.07	-0.11	-0.01	-0.16	0.951	0.929	0.99	0.892	40	42	37.1	41.6	11.04	12.73	14	10.01	High	High	High	High	High	High	High	High	High	High	High	High	High	High	High	High	Q9QYC0 [598-629]	Q9QYC0 3xPhospho [S600(100); T610(100); T614(98.4)]	7.34	100	1	37.8	46.6	42.3
FALSE	High	[R].KYSSCSTIFLDDSTVSQPNLK.[Y]	Q8BGU5	Cyclin-Y OS=Mus musculus GN=Ccny PE=1 SV=1		0.802892	0.233627	0.966582	0.116571	0.22	0.39	-0.14	0.75	1.166	1.307	0.906	1.682	7.7	6.6	10	6	11.8	16.1	20.93	35.04	High	High	High	High	High	High	High	High	High	High	High	High	High	High	High	High	Q8BGU5 [97-117]		3.24	100	1	7.4	6.1	8
FALSE	High	[R].IHFPLATYAPVISAEK.[A]	P05213	Tubulin alpha-1B chain OS=Mus musculus GN=Tuba1b PE=1 SV=2		0.999401	0.975879	0.262708	0.116711	0.01	0.09	-0.26	0.35	1.006	1.062	0.837	1.276	22.6	22.5	24	18.8	11.55	17.09	13.12	23.81	High	High	High	High	High	High	High	High	High	High	High	High	High	High	High	High	P05213 [265-280]		3.91	100	1	25.9	19.9	21.4
FALSE	High	[R].IEEELGDEAR.[F]	D3Z6E4	Gamma-enolase OS=Mus musculus GN=Eno2 PE=1 SV=1		0.45828	0.906459	0.00272992	0.117733	0.02	0.11	0.34	-0.21	1.013	1.078	1.263	0.865	31.6	31.2	34.1	39.4	12.52	7.35	2.23	3.11	High	High	High	High	High	High	High	High	High	High	High	High	High	High	High	High	D3Z6E4 [294-303]		2.49	100	1	30.9	30.7	32.3
FALSE	High	[R].YTPYPNLYPDQSPSEDWTMEER.[F]	A2A7F6	Chloride channel protein OS=Mus musculus GN=Clcn6 PE=1 SV=1		0.731593	0.275075	0.421944	0.118579	-0.36	0.41	-0.46	0.51	0.782	1.328	0.727	1.429	7	8.9	9.3	6.5	21.31	16.88	16.23	39.59	High	High	High	High	High	High	High	High	High	High	High	High	High	High	High	High	A2A7F6 [718-739]	A2A7F6 1xPhospho [S729(99.5)]	4.19	100	1	5.1	8.3	6.2
FALSE	High	[K].IHVSDQELQSANASVDDSRLEELK.[A]	Q02053	Ubiquitin-like modifier-activating enzyme 1 OS=Mus musculus GN=Uba1 PE=1 SV=1		0.999117	0.997194	0.131665	0.118875	-0.15	0.09	-0.59	0.53	0.9	1.066	0.664	1.445	8.5	9.4	9	6.3	11.43	30.37	14.44	6.92	High	High	High	High	High	High	High	High	High	High	High	High	High	High	High	High	Q02053 [807-830]	Q02053 2xPhospho [S816(100); S820(100)]	4.13	100	1	9.9	8.4	8.6
FALSE	High	[K].FGSTGSTPPVSPTPSER.[S]	D3YUI2	MKL/myocardin-like protein 1 OS=Mus musculus GN=Mkl1 PE=1 SV=1		0.947001	0.499418	0.437599	0.118901	0.01	0.22	-0.14	0.38	1.009	1.168	0.905	1.302	11.1	11	12.9	9.9	15.52	27.4	4.81	8.77	High	High	High	High	High	High	High	High	High	High	High	High	High	High	High	High	D3YUI2 [397-413]	D3YUI2 2xPhospho [S402(99.2); S407(98.5)]	3.17	100	1	9.2	10.9	13.4
FALSE	High	[R].SLESDNEEK.[A]	P11627	Neural cell adhesion molecule L1 OS=Mus musculus GN=L1cam PE=1 SV=1		0.450195	0.999272	0.0106384	0.120342	0.12	0.04	0.37	-0.21	1.087	1.025	1.29	0.864	36.7	33.7	37.6	43.5	10.04	12.82	4.02	11.42	High	High	High	High	High	High	High	High	High	High	High	High	High	High	High	High	P11627 [1181-1189]	P11627 1xPhospho [S1184(100)]	2.42	100	1	37.5	43.7	35.9
FALSE	High	[R].GSHSQSSSPGALTLGR.[Q]	O88935	Synapsin-1 OS=Mus musculus GN=Syn1 PE=1 SV=2		0.0661068	0.910325	0.990141	0.120446	0.42	-0.17	-0.05	0.3	1.342	0.89	0.966	1.235	26.2	19.6	23.3	18.9	17.51	9.81	3.67	15.99	High	High	High	High	High	High	High	High	High	High	High	High	High	High	High	High	O88935 [431-446]	O88935 2xPhospho [S434(100); S/T]	3.43	100	1	28.8	28.2	19.2
FALSE	High	[K].EMTLDQKSPEK.[A]	A2ARP8	Microtubule-associated protein 1A OS=Mus musculus GN=Map1a PE=1 SV=1		1	0.50199	0.741493	0.120752	0.12	-0.31	0.16	-0.36	1.086	0.805	1.119	0.781	53.9	49.6	43.4	55.5	18.87	6.15	15.96	5.91	High	High	High	High	High	High	High	High	High	High	High	High	High	High	High	High	A2ARP8 [1811-1821]	A2ARP8 1xPhospho [S1818(100)]	3.16	100	1	57.7	58.6	50.4
FALSE	High	[R].NLSSEEVARPR.[R]	Q8VD37	SH3-containing GRB2-like protein 3-interacting protein 1 OS=Mus musculus GN=Sgip1 PE=1 SV=1		0.265639	0.228918	0.103164	0.121998	0.17	-0.18	-0.22	0.2	1.122	0.883	0.861	1.151	62.9	56	55.5	48.2	1.85	9.91	7.05	10.21	High	High	High	High	High	High	High	High	High	High	High	High	High	High	High	High	Q8VD37 [167-177]	Q8VD37 1xPhospho [S169(100)]	3.01	100	1	62.5	63.3	61.7
FALSE	High	[R].ELGYPQEDDEEDEDEEEDEEEDSQAEVLKGSR.[G]	Q60829	Protein phosphatase 1 regulatory subunit 1B OS=Mus musculus GN=Ppp1r1b PE=1 SV=2		0.999094	0.968554	0.29793	0.122908	-0.05	0.2	-0.57	0.72	0.964	1.152	0.675	1.647	19	19.7	21.9	13.3	29.83	20.36	44.07	29.41	High	High	High	High	High	High	High	High	High	High	High	High	High	High	High	High	Q60829 [108-139]	Q60829 1xPhospho [S130(100)]	8.77	100	1	16.4	16	22
FALSE	High	[K].FKGPGDTSNFDDYEEEEIRVSINEK.[C]	P05132	cAMP-dependent protein kinase catalytic subunit alpha OS=Mus musculus GN=Prkaca PE=1 SV=3		0.846116	0.995438	0.299482	0.1233	0.07	-0.07	-0.27	0.27	1.052	0.95	0.83	1.205	98	93.2	93.1	77.3	8.84	11.31	10.28	8.69	High	High	High	High	High	High	High	High	High	High	High	High	High	High	High	High	P05132 [319-343]	P05132 1xPhospho [S339(100)]	4.95	100	1	97.3	98.7	102.1
FALSE	High	[R].ASSPPDR.[I]	A0A140LIS5	Arginine and glutamate-rich protein 1 (Fragment) OS=Mus musculus GN=Arglu1 PE=1 SV=1		0.989028	0.553923	0.523828	0.123434	0.09	-0.27	0.21	-0.39	1.067	0.828	1.159	0.763	54.7	51.3	45.3	59.4	27.55	9.57	14.43	21.39	High	High	High	High	High	High	High	High	High	High	High	High	High	High	High	High	A0A140LIS5 [71-77]	A0A140LIS5 1xPhospho [S73(99.6)]	2.3	100	1	57.3	75.8	52.2
FALSE	High	[R].TLSQSSESGTLPSGPPGHTMEVSC.[-]	Q9QYG0	Protein NDRG2 OS=Mus musculus GN=Ndrg2 PE=1 SV=1		0.755965	0.628152	0.996145	0.124099	0.14	0.17	0.04	0.28	1.102	1.129	1.027	1.211	42	38.1	47.4	39.2	20.89	10.16	6.43	8.86	High	High	High	High	High	High	High	High	High	High	High	High	High	High	High	High	Q9QYG0 [348-371]	Q9QYG0 2xPhospho [S350(100); S353(98.9)]	4.39	100	1	54.5	33.3	39.4
FALSE	High	[R].AVTCDISEDEED.[-]	P49586	Choline-phosphate cytidylyltransferase A OS=Mus musculus GN=Pcyt1a PE=1 SV=1		0.993234	0.902298	0.237744	0.124415	-0.09	0.04	-0.25	0.21	0.942	1.03	0.839	1.155	45.2	48	46.5	40.3	3.36	8.89	9.3	12.69	High	High	High	High	High	High	High	High	High	High	High	High	High	High	High	High	P49586 [356-367]	P49586 1xPhospho [S362(100)]	2.36	100	1	47.8	44.9	44.3
FALSE	High	[R].TVSDNSLSSSK.[E]	A2AQ43	Formin-binding protein 1 OS=Mus musculus GN=Fnbp1 PE=1 SV=1		0.965966	0.99857	0.202151	0.12498	0.37	-0.2	-0.58	0.75	1.29	0.872	0.668	1.685	24.6	19.1	21.5	12.7	30.53	41.77	15.97	22.93	High	High	High	High	High	High	High	High	High	High	High	High	High	High	High	High	A2AQ43 [294-304]	A2AQ43 2xPhospho [S296(99.6); S299(100)]	3.46	100	1	23	28	26.4
FALSE	High	[K].SDSNASFLR.[A]	Q8C8R3	Ankyrin-2 OS=Mus musculus GN=Ank2 PE=1 SV=2		0.991215	0.994531	0.282369	0.125103	-0.1	0.07	-1.37	1.33	0.93	1.051	0.388	2.522	100.4	107.9	105.5	41.8	55.68	61.74	55	24.04	High	High	High	High	High	High	High	High	High	High	High	High	High	High	High	High	Q8C8R3 [29-37]	Q8C8R3 2xPhospho [S31(100); S34(100)]	3.25	100	1	196	59.3	147.9
FALSE	High	[K].EGDGSATTDAAPATSPK.[A]	P06837	Neuromodulin OS=Mus musculus GN=Gap43 PE=1 SV=1		0.948419	0.807289	0.762371	0.127161	-0.04	-0.06	0.02	-0.12	0.972	0.958	1.012	0.92	105.5	108.5	101	109.8	5.46	7.82	7.75	11.11	High	High	High	High	High	High	High	High	High	High	High	High	High	High	High	High	P06837 [82-98]	P06837 1xPhospho [S96(99.6)]	4.02	100	1	97.6	110.8	103.4
FALSE	High	[K].DQALKDDDAETGLTDGEEKEEPKEEEK.[L]	P46096	Synaptotagmin-1 OS=Mus musculus GN=Syt1 PE=1 SV=1		0.998534	0.997363	0.219626	0.127447	0.17	-0.07	-0.34	0.44	1.125	0.95	0.789	1.355	121.1	107.6	115	84.9	22.03	12.76	12.13	8.25	High	High	High	High	High	High	High	High	High	High	High	High	High	High	High	High	P46096 [115-141]	P46096 1xPhospho [T128(98.9)]	4.14	100	1	130.3	130.2	112.6
FALSE	High	[R].GSPIVQEPEEASEPKEESSPRK.[T]	Q8C8R3	Ankyrin-2 OS=Mus musculus GN=Ank2 PE=1 SV=2		0.866001	0.887019	0.795017	0.12765	-0.06	-0.19	0.31	-0.57	0.959	0.874	1.242	0.675	20.6	21.5	18	26.7	11.96	9.88	15.55	25.51	High	High	High	High	High	High	High	High	High	High	High	High	High	High	High	High	Q8C8R3 [3763-3784]	Q8C8R3 2xPhospho [S3764(100); S]	4.39	100	1	19.7	22.4	17
FALSE	High	[K].QQQQQQQQQQQEQQHSSFEDELSEVFENQSPDAK.[H]	P26339	Chromogranin-A OS=Mus musculus GN=Chga PE=1 SV=1		0.43441	0.715248	0.0557219	0.127677	0.21	-0.01	0.56	-0.36	1.16	0.992	1.471	0.782	8.9	7.7	8.9	11.3	28.03	19.37	20.57	13.18	High	High	High	High	High	High	High	High	High	High	High	High	High	High	High	High	P26339 [103-136]		3.89	100	1	7.5	10.6	7.6
FALSE	High	[R].ESSPLYSPGFSDSTSAAK.[E]	P14873	Microtubule-associated protein 1B OS=Mus musculus GN=Map1b PE=1 SV=2		0.932828	0.99938	0.364358	0.12771	0.24	-0.05	-0.22	0.41	1.18	0.969	0.86	1.329	55.6	47.1	53.9	40.5	19.73	17.79	15.52	18.48	High	High	High	High	High	High	High	High	High	High	High	High	High	High	High	High	P14873 [1787-1804]	P14873 3xPhospho [S1789(99.5); S1793(100); S1797(100)]	5.04	100	1	64.2	59.4	52.1
FALSE	High	[K].GRPSSPQR.[R]	H3BL28	Protein Ppp1r9a (Fragment) OS=Mus musculus GN=Ppp1r9a PE=1 SV=1		0.944016	0.927902	0.13967	0.127993	0.06	-0.03	0.23	-0.19	1.045	0.981	1.171	0.875	73.4	70.3	72	82.3	11.87	9.82	9.69	18.82	High	High	High	High	High	High	High	High	High	High	High	High	High	High	High	High	H3BL28 [91-98]	H3BL28 1xPhospho [S94(99.5)]	2.21	100	1	75	85.4	71.9
FALSE	High	[K].MVCDVVSR.[M]	P18872	Guanine nucleotide-binding protein G(o) subunit alpha OS=Mus musculus GN=Gnao1 PE=1 SV=3		0.474666	0.0671357	0.699955	0.129067	0.12	-0.32	0.1	-0.31	1.087	0.8	1.074	0.809	31.7	29.2	25.3	31.3	4.95	13.8	10.48	5.64	High	High	High	High	High	High	High	High	High	High	High	High	High	High	High	High	P18872 [106-113]		1.02	100	1	31.7	33.1	29.4
FALSE	High	[R].KIAELEEERSQGSTSNSDWMK.[N]	P14873	Microtubule-associated protein 1B OS=Mus musculus GN=Map1b PE=1 SV=2		0.999524	0.874317	0.443529	0.129245	-0.03	0.2	-0.44	0.61	0.982	1.15	0.738	1.531	38.5	39.2	44.3	28.9	19.54	33.18	15.24	10.67	High	High	High	High	High	High	High	High	High	High	High	High	High	High	High	High	P14873 [327-347]		3.44	100	1	45.3	38.8	38.1
FALSE	High	[K].IDASKNEEDEGHSNSSPRHTEAAAAQR.[E]	Q60668	Heterogeneous nuclear ribonucleoprotein D0 OS=Mus musculus GN=Hnrnpd PE=1 SV=2		0.125604	0.980586	0.97762	0.129589	0.34	0.26	0.03	0.57	1.268	1.199	1.021	1.489	25.6	20.2	30.7	20.6	19.05	16.74	19.88	13.95	High	High	High	High	High	High	High	High	High	High	High	High	High	High	High	High	Q60668 [68-94]	Q60668 2xPhospho [S80(99.2); S/T]	3.58	100	1	35.8	24.6	25.2
FALSE	High	[R].LRSSASESR.[M]	A4GZ26	ARF6 guanine nucleotide exchange factor IQArfGEF OS=Mus musculus GN=Iqsec2 PE=1 SV=1		0.207606	0.833877	0.673228	0.130132	0.4	-0.24	-0.4	0.56	1.317	0.848	0.756	1.478	13.8	10.5	11.7	7.9	12.87	35.56	9.51	20.98	High	High	High	High	High	High	High	High	High	High	High	High	High	High	High	High	A4GZ26 [370-378]		1.66	100	1	11.4	13.3	15.5
FALSE	High	[R].DASPGRGSHSQSSSPGALTLGR.[Q]	O88935	Synapsin-1 OS=Mus musculus GN=Syn1 PE=1 SV=2		0.316899	0.52633	0.852178	0.130374	0.31	0.36	0.03	0.64	1.24	1.279	1.02	1.554	21.3	17.2	27.2	17.5	30.25	14.94	18.45	13.67	High	High	High	High	High	High	High	High	High	High	High	High	High	High	High	High	O88935 [425-446]	O88935 1xPhospho [S427(100)]	2.47	100	1	30.2	14.2	20.8
FALSE	High	[K].SQGTALEK.[Y]	P14152	Malate dehydrogenase, cytoplasmic OS=Mus musculus GN=Mdh1 PE=1 SV=3		0.856463	0.869161	0.124438	0.130411	0.3	-0.27	0.59	-0.56	1.232	0.829	1.502	0.68	19.7	16	16.3	24	24.29	23.95	26.44	11.54	High	High	High	High	High	High	High	High	High	High	High	High	High	High	High	High	P14152 [111-118]		2.03	100	1	14.7	21.3	18.3
FALSE	High	[K].AALEQPCEGSLTRPK.[K]	P84086	Complexin-2 OS=Mus musculus GN=Cplx2 PE=1 SV=1		0.917786	0.999991	0.324909	0.130636	0.08	0.09	-0.53	0.7	1.056	1.066	0.694	1.622	36.4	34.5	38.8	23.9	27.43	39.16	24.64	22.25	High	High	High	High	High	High	High	High	High	High	High	High	High	High	High	High	P84086 [84-98]	P84086 1xPhospho [S93(100)]	2.06	100	1	56.5	32.2	39
FALSE	High	[K].SETSSNPSSPEICPNK.[E]	Q5SVL6	Rap1 GTPase-activating protein 2 OS=Mus musculus GN=Rap1gap2 PE=1 SV=1		0.991619	0.377583	0.971675	0.131964	0.03	-0.14	0.06	-0.17	1.018	0.905	1.04	0.886	137.3	134.8	124.2	140.2	11.82	7.17	4.57	4.81	High	High	High	High	High	High	High	High	High	High	High	High	High	High	High	High	Q5SVL6 [586-601]	Q5SVL6 2xPhospho [S590(99.4); S593(99.4)]	4.68	100	1	130.1	152	144.9
FALSE	High	[R].VEQALSEVASSLQSSAPK.[Q]	E9Q6P5	Tetratricopeptide repeat protein 7B OS=Mus musculus GN=Ttc7b PE=1 SV=1		0.679454	0.97251	0.371245	0.132436	0.45	-0.15	-0.68	0.98	1.37	0.899	0.622	1.979	39.4	28.8	35.5	17.9	31.62	34	33.6	13.16	High	High	High	High	High	High	High	High	High	High	High	High	High	High	High	High	E9Q6P5 [668-685]	E9Q6P5 3xPhospho [S673(100); S677(100); S678(100)]	6.43	100	1	36.5	45.7	42.5
FALSE	High	[R].APESDTGDEDQDQERDAVFLKDNHLAIER.[K]	A2AUK5	Band 4.1-like protein 1 OS=Mus musculus GN=Epb41l1 PE=1 SV=1		0.999961	0.993714	0.215513	0.134285	-0.07	0.1	-0.32	0.35	0.95	1.073	0.8	1.273	16.5	17.4	17.7	13.9	19.99	11.06	13.37	11.52	High	High	High	High	High	High	High	High	High	High	High	High	High	High	High	High	A2AUK5 [575-603]	A2AUK5 2xPhospho [S578(100); T580(100)]	5.87	100	1	15.5	14.6	17.6
FALSE	High	[R].LETEDTSGSPSR.[A]	A0A0R4J0Q5	Lamin-B2 OS=Mus musculus GN=Lmnb2 PE=1 SV=1		0.49493	0.73933	0.0667291	0.13536	0.2	-0.07	0.37	-0.24	1.152	0.95	1.295	0.845	58.2	50.5	55.3	65.5	8.54	7.7	22.59	6.49	High	High	High	High	High	High	High	High	High	High	High	High	High	High	High	High	A0A0R4J0Q5 [438-449]	A0A0R4J0Q5 1xPhospho [S446(100)]	3.6	100	1	53.9	60.4	56.1
FALSE	High	[K].ESQSVLIADGDGSEVSDEEEASFPSEER.[K]	Q99KY4	Cyclin-G-associated kinase OS=Mus musculus GN=Gak PE=1 SV=2		0.951551	0.275935	0.75706	0.135694	-0.08	0.41	-0.15	0.48	0.948	1.324	0.902	1.392	7.9	8.4	10.5	7.6	22.68	8.61	16.25	23.92	High	High	High	High	High	High	High	High	High	High	High	High	High	High	High	High	Q99KY4 [812-839]	Q99KY4 2xPhospho [S824(100); S827(100)]	5.81	100	1	8.2	5.7	7.7
FALSE	High	[R].FYYSSGSSSPTHAK.[S]	Q60771	Claudin-11 OS=Mus musculus GN=Cldn11 PE=1 SV=1		0.948615	0.535243	0.966907	0.136256	-0.15	0.44	-0.2	0.49	0.901	1.359	0.869	1.408	223.7	248.4	304.1	215.9	36.09	23.33	26.89	19.52	High	High	High	High	High	High	High	High	High	High	High	High	High	High	High	High	Q60771 [190-203]	Q60771 2xPhospho [S194(98.7); S196(98.1)]	4.22	100	1	411.9	221.6	225.8
FALSE	High	[K].AEDGAAPSPSSETPKKK.[K]	P26645	Myristoylated alanine-rich C-kinase substrate OS=Mus musculus GN=Marcks PE=1 SV=2		0.143028	0.999276	0.999663	0.136738	0.43	-0.01	-0.06	0.47	1.345	0.991	0.961	1.387	40.7	30.2	40.3	29.1	29.87	14.14	22.47	8.3	High	High	High	High	High	High	High	High	High	High	High	High	High	High	High	High	P26645 [131-147]		3.7	100	1	58.1	43.6	37.9
FALSE	High	[R].RSRSHSDNDRFK.[H]	Q9R0U0	Serine/arginine-rich splicing factor 10 OS=Mus musculus GN=Srsf10 PE=1 SV=2		0.95995	0.0488007	0.69308	0.137088	0.03	0.2	0.06	0.16	1.018	1.149	1.045	1.119	105.3	103.4	121	108.1	4.09	10.22	8.46	1.84	High	High	High	High	High	High	High	High	High	High	High	High	High	High	High	High	Q9R0U0 [155-166]	Q9R0U0 3xPhospho [S156(100); S158(100); S160(100)]	1.94	100	1	100.1	110.6	105.9
FALSE	High	[K].DKPTYDEIFYTLSPVNGK.[I]	Q9WVK4	EH domain-containing protein 1 OS=Mus musculus GN=Ehd1 PE=1 SV=1		0.961728	0.710333	0.333452	0.138028	-0.01	-0.17	0.31	-0.49	0.994	0.89	1.24	0.713	13.7	13.8	12.2	17.1	20.07	13.91	25.8	15.04	High	High	High	High	High	High	High	High	High	High	High	High	High	High	High	High	Q9WVK4 [444-461]	Q9WVK4 1xPhospho [S456(100)]	3.99	100	1	12.1	15.1	12.5
FALSE	High	[K].SGSKENVQETQI.[-]	P0C192	Leucine-rich repeat-containing protein 4B OS=Mus musculus GN=Lrrc4b PE=1 SV=1		0.482391	0.999361	0.868245	0.13932	-0.24	0.02	0.22	-0.45	0.848	1.01	1.167	0.734	20.9	24.6	21.1	28.7	16.24	18.25	16.64	10.91	High	High	High	High	High	High	High	High	High	High	High	High	High	High	High	High	P0C192 [698-709]	P0C192 1xPhospho [S700(100)]	3.69	100	1	21.2	19.5	27.5
FALSE	High	[R].DASPGRGSHSQSSSPGALTLGR.[Q]	O88935	Synapsin-1 OS=Mus musculus GN=Syn1 PE=1 SV=2		0.708541	0.729701	0.995084	0.139551	0.23	0.25	0.04	0.44	1.177	1.185	1.026	1.36	26.4	22.4	31.3	23	7.88	18.94	20.88	12.84	High	High	High	High	High	High	High	High	High	High	High	High	High	High	High	High	O88935 [425-446]	O88935 3xPhospho [S427(100); S434(97.6); S/T]	1.54	100	1	25.7	23.7	28.5
FALSE	High	[K].SPAVSPSK.[T]	Q9QYB8	Beta-adducin OS=Mus musculus GN=Add2 PE=1 SV=4		0.75435	0.98833	0.729438	0.139654	-0.12	-0.15	0.21	-0.48	0.921	0.899	1.157	0.715	25.8	28	23.2	32.4	16.28	23.48	25.81	3.73	High	High	High	High	High	High	High	High	High	High	High	High	High	High	High	High	Q9QYB8 [614-621]	Q9QYB8 1xPhospho [S618(100)]	1.47	100	1	18.8	26.6	27.8
FALSE	High	[R].RSRSASRER.[R]	E9Q6E5	Protein Srsf11 OS=Mus musculus GN=Srsf11 PE=1 SV=1		0.99149	0.999076	0.177069	0.139678	-0.02	0.03	0.34	-0.34	0.984	1.019	1.266	0.791	27.2	27.7	27.8	35.1	13.99	14.96	8.51	8.17	High	High	High	High	High	High	High	High	High	High	High	High	High	High	High	High	E9Q6E5 [363-371]	E9Q6E5 3xPhospho [S364(100); S366(100); S368(100)]	2.2	100	1	23.1	28	26.5
FALSE	High	[K].YEDIKSKEEQELHDIHSTR.[S]	P35802	Neuronal membrane glycoprotein M6-a OS=Mus musculus GN=Gpm6a PE=1 SV=1		0.677711	0.998532	0.716587	0.140017	0.26	0.03	-0.62	0.92	1.199	1.024	0.649	1.892	39.9	33.3	40.9	21.6	48.57	29.93	33.26	26.57	High	High	High	High	High	High	High	High	High	High	High	High	High	High	High	High	P35802 [251-269]	P35802 2xPhospho [S267(98.8); Y/S/T]	3.51	100	1	71.9	44.2	36
FALSE	High	[R].REEQTDTSDGESVTHHIR.[R]	P36916	Guanine nucleotide-binding protein-like 1 OS=Mus musculus GN=Gnl1 PE=1 SV=4		0.505338	0.927684	0.988886	0.140668	0.27	0.35	-0.22	0.84	1.202	1.278	0.858	1.791	14.9	12.4	19	10.6	42.26	29.56	42.15	4.78	High	High	High	High	High	High	High	High	High	High	High	High	High	High	High	High	P36916 [44-61]	P36916 1xPhospho [S51(99.5)]	6.47	100	1	27.7	15.2	11.2
FALSE	High	[K].QAEDTISNASSQLSSPPTSPQSSPR.[K]	A0A0A6YWG7	Rap guanine nucleotide exchange factor 2 OS=Mus musculus GN=Rapgef2 PE=1 SV=1		0.592602	0.990693	0.863092	0.140859	-0.14	-0.05	0.09	-0.28	0.906	0.967	1.064	0.823	58.8	65	56.9	69.1	9.46	9.54	9.57	13.3	High	High	High	High	High	High	High	High	High	High	High	High	High	High	High	High	A0A0A6YWG7 [1249-1273]	A0A0A6YWG7 2xPhospho [S1267(99.4); S/T]	8.19	100	1	52.8	58.2	59.5
FALSE	High	[R].SLSTSGESLYHVLGLDK.[N]	G5E8T0	DnaJ (Hsp40) homolog, subfamily C, member 5, isoform CRA_b OS=Mus musculus GN=Dnajc5 PE=1 SV=1		0.61471	0.940106	0.948369	0.142281	0.2	0.47	-0.21	0.87	1.148	1.382	0.867	1.829	45.2	39.4	62.4	34.1	47.36	11.41	31.39	15.02	High	High	High	High	High	High	High	High	High	High	High	High	High	High	High	High	G5E8T0 [8-24]	G5E8T0 1xPhospho [S10(99.2)]	5.63	100	1	93.1	46.1	44.3
FALSE	High	[K].EMGTPLADTPTRPVTR.[H]	Q9EQF6	Dihydropyrimidinase-related protein 5 OS=Mus musculus GN=Dpysl5 PE=1 SV=1		0.959793	0.617681	0.926326	0.143704	0	-0.28	0.18	-0.47	0.997	0.823	1.136	0.722	170.2	170.7	140	193.9	20.13	18.14	25.49	10.11	High	High	High	High	High	High	High	High	High	High	High	High	High	High	High	High	Q9EQF6 [506-521]	Q9EQF6 2xPhospho [T509(100); T514(100)]	3.97	100	1	181.6	208	159.6
FALSE	High	[R].QDITQLEESIRADTPSGDEQEPNGALDSK.[G]	O70551	SRSF protein kinase 1 OS=Mus musculus GN=Srpk1 PE=1 SV=2		0.999622	0.344909	0.960443	0.145209	0.01	0.15	-0.08	0.24	1.004	1.113	0.947	1.179	56.8	56.6	63.2	53.6	14.07	6.35	6.35	6.21	High	High	High	High	High	High	High	High	High	High	High	High	High	High	High	High	O70551 [435-463]	O70551 2xPhospho [T448(100); S450(100)]	5.08	100	1	48.9	51.8	65.5
FALSE	High	[R].KEDRSASSGAEGDVSSEREP.[-]	Q9DD18	D-tyrosyl-tRNA(Tyr) deacylase 1 OS=Mus musculus GN=Dtd1 PE=1 SV=2		0.905878	0.951244	0.115182	0.14577	0.12	-0.13	0.53	-0.54	1.088	0.913	1.444	0.688	11	10.1	10.1	14.6	25.85	29.19	23.67	21.43	High	High	High	High	High	High	High	High	High	High	High	High	High	High	High	High	Q9DD18 [190-209]	Q9DD18 2xPhospho [S196(98.8); S197(98.8)]	3.62	100	1	9.2	13.2	8.8
FALSE	High	[K].QSHSPQPSSPEPSKK.[Q]	Q9ET80	Junctophilin-1 OS=Mus musculus GN=Jph1 PE=1 SV=1		0.958574	0.456918	0.577751	0.146034	0.06	-0.19	0.23	-0.35	1.046	0.878	1.172	0.783	40.8	39	35.8	45.8	10.07	16.73	9.39	12.5	High	High	High	High	High	High	High	High	High	High	High	High	High	High	High	High	Q9ET80 [472-486]	Q9ET80 2xPhospho [S475(98.9); S480(98.9)]	3.11	100	1	37.6	47	39
FALSE	High	[R].KESKEETPEVTK.[T]	P14873	Microtubule-associated protein 1B OS=Mus musculus GN=Map1b PE=1 SV=2		0.201964	0.585341	0.468002	0.146231	-0.11	0.09	0.07	-0.1	0.924	1.064	1.05	0.936	72.3	78.2	76.9	82.1	1.95	1.86	8.87	6.58	High	High	High	High	High	High	High	High	High	High	High	High	High	High	High	High	P14873 [559-570]	P14873 1xPhospho [S561(100)]	3.89	100	1	70.8	74	72.9
FALSE	High	[K].VLDTPLSEGDEPTTLPAQR.[D]	Q3UGX2	Spectrin beta 1 OS=Mus musculus GN=Sptb PE=1 SV=1		1	0.921597	0.366057	0.146624	0.12	-0.42	0.63	-0.94	1.084	0.746	1.547	0.523	6.8	6.3	5.1	9.7	21.31	46.48	32.57	18.84	High	High	High	High	High	High	High	High	High	High	High	High	High	High	High	High	Q3UGX2 [2156-2174]	Q3UGX2 2xPhospho [T2159(100); S2162(100)]	3.33	100	1	6.6	8.1	7
FALSE	High	[R].TSAWLDDGDDLDFSPPR.[C]	A0A140LHW2	Rho GTPase-activating protein 33 OS=Mus musculus GN=Arhgap33 PE=1 SV=1		0.948401	0.462785	0.992052	0.14702	-0.13	-0.21	0.13	-0.47	0.915	0.867	1.095	0.724	15.9	17.4	13.8	19	16.73	12.38	11.68	26.35	High	High	High	High	High	High	High	High	High	High	High	High	High	High	High	High	A0A140LHW2 [712-728]	A0A140LHW2 1xPhospho [S725(100)]	3.99	100	1	15.2	14.2	16.6
FALSE	High	[-].ASQKRPSQR.[S]	F6ZIA4	Myelin basic protein (Fragment) OS=Mus musculus GN=Mbp PE=1 SV=1		0.994319	0.995079	0.14453	0.14728	-0.52	0.1	-1.61	1.19	0.697	1.072	0.328	2.277	85.7	123	91.8	40.3	34.11	50.81	35.82	60.35	High	High	High	High	High	High	High	High	High	High	High	High	High	High	High	High	F6ZIA4 [1-9]	F6ZIA4 1xAcetyl [N-Term]; 1xPhospho [S2(100)]	1.78	100	1	118.9	74.6	98.4
FALSE	High	[R].RASQSSLESSSGPPCIR.[S]	Q99NE5	Regulating synaptic membrane exocytosis protein 1 OS=Mus musculus GN=Rims1 PE=1 SV=2		0.999718	0.128085	1	0.147575	0.07	-0.58	0	-0.51	1.052	0.671	1.002	0.704	18.5	17.6	12.4	17.7	19.46	16.42	22.28	7.14	High	High	High	High	High	High	High	High	High	High	High	High	High	High	High	High	Q99NE5 [1446-1462]	Q99NE5 1xPhospho [S1448(98.9)]	1.74	100	1	13.4	19.6	21.6
FALSE	High	[R].HPSSQLAGPGVEGGEGTQKPR.[D]	E9PUL5	Proline-rich transmembrane protein 2 OS=Mus musculus GN=Prrt2 PE=1 SV=1		0.999738	0.400598	0.862002	0.147956	-0.02	-0.2	0.21	-0.43	0.989	0.87	1.157	0.743	22.8	23	19.8	26.6	2.71	13.93	10.09	20.36	High	High	High	High	High	High	High	High	High	High	High	High	High	High	High	High	E9PUL5 [252-272]	E9PUL5 2xPhospho [S254(100); S255(100)]	6.12	100	1	23	23.8	22.5
FALSE	High	[K].SAPTSPCDQELK.[E]	P16054	Protein kinase C epsilon type OS=Mus musculus GN=Prkce PE=1 SV=1		0.286123	0.380996	0.206112	0.147995	-0.31	0.29	0.25	-0.26	0.808	1.224	1.186	0.834	15.1	18.6	18.4	22.1	6	14.08	15.49	29.01	High	High	High	High	High	High	High	High	High	High	High	High	High	High	High	High	P16054 [346-357]	P16054 1xPhospho [S350(100)]	2.85	100	1	15.3	14.9	16.3
FALSE	High	[R].SSVASPR.[R]	P20357	Microtubule-associated protein 2 OS=Mus musculus GN=Map2 PE=1 SV=2		0.988259	0.992373	0.138056	0.148047	0.04	-0.12	0.44	-0.51	1.031	0.92	1.352	0.701	235.7	228.7	216.8	309.3	17.55	22.18	20.44	16.03	High	High	High	High	High	High	High	High	High	High	High	High	High	High	High	High	P20357 [1787-1793]	P20357 1xPhospho [S1791(100)]	1.74	100	1	195.5	269.8	206
FALSE	High	[K].KEKEAAGGNDSSGATSPINPAVALE.[-]	P11627	Neural cell adhesion molecule L1 OS=Mus musculus GN=L1cam PE=1 SV=1		0.988094	0.659499	0.480998	0.148173	-0.01	0.27	-0.3	0.57	0.996	1.206	0.81	1.483	10.7	10.8	12.9	8.7	22.62	30.28	25.68	29.85	High	High	High	High	High	High	High	High	High	High	High	High	High	High	High	High	P11627 [1236-1260]		3.05	100	1	7.9	10.1	11.3
FALSE	High	[K].MQVPTAEEMSSLTPESSPELAK.[R]	D3Z5P0	Serine/threonine-protein kinase BRSK1 OS=Mus musculus GN=Brsk1 PE=1 SV=1		0.345819	0.831717	0.992648	0.148617	-0.25	-0.34	-0.04	-0.55	0.843	0.788	0.975	0.681	8.1	9.6	6.4	9.4	19.71	18.15	22.25	19.79	High	High	High	High	High	High	High	High	High	High	High	High	High	High	High	High	D3Z5P0 [496-517]	D3Z5P0 2xPhospho [S511(83.1); S512(83.1)]	1.08	100	1	8.5	9.2	5.7
FALSE	High	[R].SSSAPNVHINTIEPVNIDEKFPEVELQDQR.[D]	P28028	Serine/threonine-protein kinase B-raf OS=Mus musculus GN=Braf PE=1 SV=3		0.454457	0.825908	0.999888	0.148942	0.24	0.11	-0.14	0.49	1.178	1.081	0.904	1.408	20.4	17.3	22	15.7	11.09	24.13	13.45	20.34	High	High	High	High	High	High	High	High	High	High	High	High	High	High	High	High	P28028 [346-375]		6.65	100	1	20.2	20.9	16.3
FALSE	High	[R].RQSSVTSQSQDVASLSSPSR.[V]	S4R1C4	Calcium-transporting ATPase OS=Mus musculus GN=Atp2b2 PE=1 SV=1		0.986181	0.997204	0.327475	0.148982	0.05	-0.07	0.11	-0.13	1.036	0.956	1.082	0.915	88.9	85.8	84.9	92.8	9.67	4.46	4.52	2.07	High	High	High	High	High	High	High	High	High	High	High	High	High	High	High	High	S4R1C4 [1114-1133]	S4R1C4 2xPhospho [S1116(100); S1117(100)]	6.25	100	1	89	88.8	72.8
FALSE	High	[K].QLDHESDDADREDEERSQDERER.[G]	Q8BPN8	DmX-like protein 2 OS=Mus musculus GN=Dmxl2 PE=1 SV=3		0.892395	0.527964	0.996267	0.149401	0.06	0.55	0	0.61	1.042	1.462	1.002	1.521	23.8	22.8	34.7	22.8	30.26	18.93	18.09	16.99	High	High	High	High	High	High	High	High	High	High	High	High	High	High	High	High	Q8BPN8 [418-440]		3.21	100	1	21.3	24.4	23.2
FALSE	High	[K].IPSSPDLKK.[S]	P63141	Potassium voltage-gated channel subfamily A member 2 OS=Mus musculus GN=Kcna2 PE=1 SV=1		0.893065	0.533764	0.995638	0.14946	-0.2	-0.34	-0.03	-0.51	0.868	0.793	0.981	0.702	24	27.6	19	27.1	29.58	15.59	26.97	12.46	High	High	High	High	High	High	High	High	High	High	High	High	High	High	High	High	P63141 [438-446]	P63141 2xPhospho [S440(100); S441(100)]	1.67	100	1	34.1	29.8	19.1
FALSE	High	[K].KEKEPAEGNESSEAPSPVNAMNSFV.[-]	Q810U4	Neuronal cell adhesion molecule OS=Mus musculus GN=Nrcam PE=1 SV=2		0.968847	0.999969	0.311077	0.149833	-0.36	0.28	0.44	-0.51	0.781	1.215	1.355	0.7	8.1	10.4	9.8	14.1	47.05	11	11.36	13.33	High	High	High	High	High	High	High	High	High	High	High	High	High	High	High	High	Q810U4 [1232-1256]		3.96	100	1	8.6	7.7	7.6
FALSE	High	[K].ATAVPDSLCKTPEDISTPPEGTKPCLQTPVTSER.[G]	Q8C8R3	Ankyrin-2 OS=Mus musculus GN=Ank2 PE=1 SV=2		0.99265	0.692418	0.789152	0.150388	0.03	0.16	-0.32	0.51	1.023	1.117	0.801	1.427	11.8	11.6	13.2	9.3	32.62	13.85	15.26	18.2	High	High	High	High	High	High	High	High	High	High	High	High	High	High	High	High	Q8C8R3 [3729-3762]	Q8C8R3 3xPhospho [T3739(97.2); T3756(99.9); S/T]	5.19	100	1	7.4	16.4	13.4
FALSE	High	[R].IAAPELQKGDSDSEEDEPAKK.[K]	Q9EQC8	Papillary renal cell carcinoma (Translocation-associated) OS=Mus musculus GN=Prcc PE=1 SV=1		0.851034	0.982371	0.67493	0.150586	-0.07	0.01	0.2	-0.27	0.955	1.004	1.152	0.832	35.6	37.3	35.7	42.9	13.36	9.13	10.29	9.23	High	High	High	High	High	High	High	High	High	High	High	High	High	High	High	High	Q9EQC8 [147-167]	Q9EQC8 2xPhospho [S157(100); S159(100)]	2.61	100	1	32.6	43	33.1
FALSE	High	[R].SRSSSPGSK.[T]	Q569Z5	Probable ATP-dependent RNA helicase DDX46 OS=Mus musculus GN=Ddx46 PE=1 SV=2		0.91785	0.600022	0.375299	0.150822	0.04	-0.16	0.25	-0.37	1.027	0.893	1.186	0.773	13.8	13.4	12.3	15.9	23.23	21.13	20.59	19.46	High	High	High	High	High	High	High	High	High	High	High	High	High	High	High	High	Q569Z5 [102-110]	Q569Z5 3xPhospho [S102(99.1); S104(99.1); S106(99.1)]	1.44	100	1	10.6	11.5	16.5
FALSE	High	[K].VAELEEEQSQGSSSYSDWVK.[N]	A2ARP8	Microtubule-associated protein 1A OS=Mus musculus GN=Map1a PE=1 SV=1		0.996658	0.745146	0.70429	0.150964	0.09	0.14	-0.3	0.53	1.064	1.099	0.811	1.442	50.7	47.7	55.8	38.7	29.38	18.59	30.11	8.9	High	High	High	High	High	High	High	High	High	High	High	High	High	High	High	High	A2ARP8 [344-363]	A2ARP8 1xPhospho [S352(100)]	5.71	100	1	66.3	48.8	52.8
FALSE	High	[R].RDSAEKQEQPPPSYKPLFLDR.[G]	Q3V0I2	Proline-rich protein 7 OS=Mus musculus GN=Prr7 PE=1 SV=1		0.998173	0.981273	0.0613354	0.151007	0.01	-0.11	-0.37	0.27	1.01	0.929	0.776	1.209	46.5	46	43.1	35.7	8.89	8.35	10.04	16.62	High	High	High	High	High	High	High	High	High	High	High	High	High	High	High	High	Q3V0I2 [183-203]	Q3V0I2 1xPhospho [S185(100)]	3.54	100	1	40.1	44.6	48.4
FALSE	High	[K].QNSSPPSSLNK.[N]	Q3UHH0	Calcium-transporting ATPase OS=Mus musculus GN=Atp2b2 PE=1 SV=1		0.991475	0.262191	0.999816	0.151057	-0.02	-0.23	0.03	-0.28	0.986	0.853	1.02	0.825	50.5	51.2	43.1	52.3	6.24	10.37	22.26	11.05	High	High	High	High	High	High	High	High	High	High	High	High	High	High	High	High	Q3UHH0 [1149-1159]		2.45	100	1	50.5	55.7	48.1
FALSE	High	[R].TSSKESSPVPSPTLDR.[K]	Q62261	Spectrin beta chain, non-erythrocytic 1 OS=Mus musculus GN=Sptbn1 PE=1 SV=2		0.87331	0.997246	0.546744	0.151085	-0.1	-0.03	0.1	-0.23	0.932	0.98	1.074	0.85	143.7	154.2	140.7	165.6	12.08	10.12	12.03	5.99	High	High	High	High	High	High	High	High	High	High	High	High	High	High	High	High	Q62261 [2158-2173]	Q62261 3xPhospho [S2160(99.5); S2164(99.5); S2168(99.5)]	5.04	100	1	123.3	143.8	143.5
FALSE	High	[K].SNHVLAQMDHGDSA.[-]	G3UYC3	RAS guanyl-releasing protein 1 OS=Mus musculus GN=Rasgrp1 PE=1 SV=1		0.0861654	0.984031	1	0.15124	0.37	-0.07	-0.07	0.38	1.294	0.954	0.951	1.299	19.9	15.4	19	14.6	15.93	11.07	8.86	17.7	High	High	High	High	High	High	High	High	High	High	High	High	High	High	High	High	G3UYC3 [747-760]	G3UYC3 1xPhospho [S759(100)]	1.66	100	1	24.2	16.9	18.6
FALSE	High	[R].RVESEESGDEEGKK.[H]	Q3UM45	Protein phosphatase 1 regulatory subunit 7 OS=Mus musculus GN=Ppp1r7 PE=1 SV=2		0.74127	0.711101	0.138916	0.151361	0.01	0.11	0.3	-0.19	1.006	1.079	1.235	0.879	64.1	63.7	69.2	78.7	8.12	15.92	5.22	9.02	High	High	High	High	High	High	High	High	High	High	High	High	High	High	High	High	Q3UM45 [21-34]	Q3UM45 1xPhospho [S24(100)]	2.19	100	1	56.4	64.3	64
FALSE	High	[K].MGSDGESDQASGTSSDEVQSPTGVCLR.[N]	Q8K0D0	Cyclin-dependent kinase 17 OS=Mus musculus GN=Cdk17 PE=1 SV=2		0.196591	0.77809	0.685991	0.151935	0.49	-0.11	-0.07	0.45	1.407	0.926	0.953	1.368	15.1	10.7	14	10.2	3.08	20.58	15.12	25.86	High	High	High	High	High	High	High	High	High	High	High	High	High	High	High	High	Q8K0D0 [103-129]	Q8K0D0 1xPhospho [T124(99.5)]	4.88	100	1	15.1	15	15.1
FALSE	High	[R].LPSSPASPSPKGTPEKASER.[A]	A2AUK5	Band 4.1-like protein 1 OS=Mus musculus GN=Epb41l1 PE=1 SV=1		0.997156	0.177432	0.990575	0.151998	0	-0.43	0.11	-0.55	0.997	0.741	1.079	0.685	16	16	11.8	17.3	7.03	13.28	24.87	19.2	High	High	High	High	High	High	High	High	High	High	High	High	High	High	High	High	A2AUK5 [538-557]	A2AUK5 2xPhospho [S546(98.4); T550(98.4)]	1.64	100	1	15.5	16.5	17.5
FALSE	High	[R].TAKDSDDDDDVTVTVDRDR.[F]	O35526	Syntaxin-1A OS=Mus musculus GN=Stx1a PE=1 SV=3		0.918176	0.064835	0.99933	0.152061	0.1	-0.4	-0.03	-0.28	1.069	0.758	0.981	0.826	45.9	42.9	34.8	42.1	7.95	11.2	13.91	9.73	High	High	High	High	High	High	High	High	High	High	High	High	High	High	High	High	O35526 [10-28]		2.03	100	1	39.4	45.1	47.1
FALSE	High	[R].AGSPQLDDIR.[V]	Q8CHW4	Translation initiation factor eIF-2B subunit epsilon OS=Mus musculus GN=Eif2b5 PE=1 SV=1		0.869743	0.999994	0.433302	0.152409	-0.19	-0.03	0.2	-0.43	0.878	0.977	1.152	0.745	136	155	132.9	178.5	11.31	22.57	14.84	12.92	High	High	High	High	High	High	High	High	High	High	High	High	High	High	High	High	Q8CHW4 [538-547]	Q8CHW4 1xPhospho [S540(100)]	3.35	100	1	128.4	139.1	133
FALSE	High	[R].LSYAGGRPPSYAGSPVHHAAER.[L]	Q9QWI6	SRC kinase signaling inhibitor 1 OS=Mus musculus GN=Srcin1 PE=1 SV=2		0.873038	0.266161	0.683188	0.152549	0.18	-0.3	0.23	-0.35	1.136	0.813	1.174	0.787	14.6	12.8	11.8	15.1	13.49	25.12	13.7	3.44	High	High	High	High	High	High	High	High	High	High	High	High	High	High	High	High	Q9QWI6 [398-419]	Q9QWI6 2xPhospho [S407(100); S411(100)]	4.79	100	1	17	14.8	14.3
FALSE	High	[K].VREEYPDR.[I]	Q9ERD7	Tubulin beta-3 chain OS=Mus musculus GN=Tubb3 PE=1 SV=1		0.892703	0.997014	0.527774	0.153266	-0.12	0.03	0.11	-0.2	0.92	1.02	1.078	0.87	19	20.7	19.4	22.3	15.84	6.12	8.77	1.86	High	High	High	High	High	High	High	High	High	High	High	High	High	High	High	High	Q9ERD7 [155-162]		2.41	100	1	23.7	19.4	16.3
FALSE	High	[R].EIEDLSQSQSPESETDYPVSTDTR.[D]	Q9EPN1	Neurobeachin OS=Mus musculus GN=Nbea PE=1 SV=1		0.980951	0.936932	0.555343	0.153322	-0.02	-0.21	0.32	-0.54	0.988	0.867	1.245	0.688	27.4	27.8	23.8	34.6	26.57	14.12	20.88	8.64	High	High	High	High	High	High	High	High	High	High	High	High	High	High	High	High	Q9EPN1 [992-1015]	Q9EPN1 1xPhospho [S1001(100)]	6.24	100	1	19.6	33.2	22.7
FALSE	High	[K].SAYQDYDSDSDVPEELKR.[D]	Q8CI71	Syndetin OS=Mus musculus GN=Vps50 PE=1 SV=2		0.883017	0.985523	0.276156	0.153989	-0.04	0.07	0.25	-0.22	0.972	1.052	1.192	0.858	77.5	79.8	81.6	95.1	6.43	10.02	13.81	11.11	High	High	High	High	High	High	High	High	High	High	High	High	High	High	High	High	Q8CI71 [552-569]	Q8CI71 1xPhospho [S559(100)]	3.2	100	1	79.2	71	75.9
FALSE	High	[R].RRSPTPPPR.[R]	E9PUK6	Serine/arginine repetitive matrix protein 1 OS=Mus musculus GN=Srrm1 PE=1 SV=1		0.720661	0.793849	0.191199	0.154971	-0.07	0.07	0.18	-0.18	0.949	1.051	1.129	0.884	87.3	91.9	91.8	103.8	10.27	7.09	5.08	9.87	High	High	High	High	High	High	High	High	High	High	High	High	High	High	High	High	E9PUK6 [589-597]	E9PUK6 2xPhospho [S591(100); T593(100)]	3.73	100	1	96.6	89.4	85.2
FALSE	High	[R].ISENYSDKSDVENADESSSSILKPLISPAAER.[I]	E9Q8N8; O88343	Anion exchange protein OS=Mus musculus GN=Slc4a4 PE=1 SV=1 Electrogenic sodium bicarbonate cotransporter 1 OS=Mus musculus GN=Slc4a4 PE=1 SV=2	Shared	0.987558	0.696248	0.823361	0.155434	0.12	0.12	-0.11	0.34	1.087	1.086	0.93	1.269	79.8	73.4	86.6	68.3	8.41	19.04	15.84	11.21	High	High	High	High	High	High	High	High	High	High	High	High	High	High	High	High	E9Q8N8 [60-91]; O88343 [60-91]	E9Q8N8 2xPhospho [S65(100); S68(100)]; O88343 2xPhospho [S65(100); S68(100)]	4.38	100	2	81	78.6	83.3
FALSE	High	[R].STGVSFWTQDSDENEQERQSDTEDGSSK.[R]	Q9DBR7	Protein phosphatase 1 regulatory subunit 12A OS=Mus musculus GN=Ppp1r12a PE=1 SV=2		0.999234	0.174881	0.00433885	0.155601	-0.04	-0.09	-0.28	0.15	0.972	0.94	0.825	1.107	41.1	42.3	38.6	34.9	9.79	2.35	5.91	6.13	High	High	High	High	High	High	High	High	High	High	High	High	High	High	High	High	Q9DBR7 [851-878]	Q9DBR7 2xPhospho [S861(100); S870(99)]	6.31	100	1	39.2	41.6	40.6
FALSE	High	[K].TQSDDSGDDDEEPAAPADNSELHHTLK.[T]	Q5QNQ6	Oxysterol-binding protein 2 OS=Mus musculus GN=Osbp2 PE=1 SV=1		0.81339	0.51663	1	0.155914	0.13	0.4	0.07	0.46	1.097	1.318	1.048	1.379	19.6	17.9	25.9	18.7	35.89	9.08	17.22	15.07	High	High	High	High	High	High	High	High	High	High	High	High	High	High	High	High	Q5QNQ6 [279-305]	Q5QNQ6 2xPhospho [S281(100); S284(100)]	7.98	100	1	31.5	22.7	17
FALSE	High	[K].IAELEEERSQGSTSNSDWMK.[N]	P14873	Microtubule-associated protein 1B OS=Mus musculus GN=Map1b PE=1 SV=2		0.434371	0.996574	0.954021	0.156095	0.38	-0.03	-0.1	0.46	1.304	0.982	0.932	1.374	50	38.3	49.1	35.7	16.52	19.2	16.69	7.36	High	High	High	High	High	High	High	High	High	High	High	High	High	High	High	High	P14873 [328-347]	P14873 2xPhospho [S336(100); S339(100)]	4.98	100	1	48	52.3	52
FALSE	High	[R].GDEDFQSDSDSFNPTLWEEQR.[Q]	A0A0G2JDT9	Leucine-rich repeat-containing protein 7 OS=Mus musculus GN=Lrrc7 PE=1 SV=1		0.876871	0.781234	0.932039	0.156122	-0.1	-0.08	0.09	-0.26	0.933	0.949	1.063	0.833	95.1	102	90.3	108.4	15.82	10.24	13.96	6.27	High	High	High	High	High	High	High	High	High	High	High	High	High	High	High	High	A0A0G2JDT9 [438-458]	A0A0G2JDT9 1xPhospho [S444(100)]	7.27	100	1	81	95.9	94.4
FALSE	High	[R].NSGYDTEPEIIEETNVDR.[V]	D3YZ21	Protein D430041D05Rik OS=Mus musculus GN=D430041D05Rik PE=1 SV=1		0.980487	0.098992	0.999696	0.157555	0.03	-0.31	-0.08	-0.2	1.018	0.808	0.945	0.87	32.2	31.6	26	29.9	5.99	8.93	12.46	13.5	High	High	High	High	High	High	High	High	High	High	High	High	High	High	High	High	D3YZ21 [1067-1084]	D3YZ21 1xPhospho [T1072(100)]	3.17	100	1	29.2	33.1	33.2
FALSE	High	[K].KGSSEESVDEDRGLVPEPLPTAK.[A]	Q8C8R3	Ankyrin-2 OS=Mus musculus GN=Ank2 PE=1 SV=2		0.983299	0.261464	0.999992	0.158231	-0.06	-0.37	-0.13	-0.31	0.956	0.772	0.915	0.807	72.2	75.5	55.7	69	22.12	18.12	8.18	16.61	High	High	High	High	High	High	High	High	High	High	High	High	High	High	High	High	Q8C8R3 [1697-1719]	Q8C8R3 3xPhospho [S1699(100); S1700(100); S1703(100)]	7	100	1	74.5	91.8	69.9
FALSE	High	[K].SGYHDDSDEDLLE.[-]	Q6PHU5	Sortilin OS=Mus musculus GN=Sort1 PE=1 SV=1		0.255155	1	0.989445	0.158392	0.38	0.09	0.1	0.36	1.298	1.061	1.072	1.284	30	23.1	31.9	24.8	23.97	19.88	12	18.68	High	High	High	High	High	High	High	High	High	High	High	High	High	High	High	High	Q6PHU5 [813-825]	Q6PHU5 1xPhospho [S819(100)]	1.71	100	1	44	30.5	29.5
FALSE	High	[K].EEGTGESAGGSPARSLTR.[S]	Q80U23	Syntaphilin OS=Mus musculus GN=Snph PE=1 SV=3		0.989913	0.991571	0.155526	0.160008	0.05	-0.01	-0.25	0.28	1.032	0.991	0.841	1.216	25.4	24.6	25.1	20.7	6.57	17.33	13.15	15.84	High	High	High	High	High	High	High	High	High	High	High	High	High	High	High	High	Q80U23 [194-211]	Q80U23 3xPhospho [S200(100); S204(100); S208(98.4)]	2.06	100	1	25.7	25.1	22.3
FALSE	High	[K].ESSDSTNTTIEDEDAKAR.[K]	P28652	Calcium/calmodulin-dependent protein kinase type II subunit beta OS=Mus musculus GN=Camk2b PE=1 SV=2		0.876803	0.874319	0.865276	0.160026	0.27	0.02	-0.09	0.38	1.206	1.017	0.94	1.306	227	188.3	231	176.9	23.14	12.86	11.32	7.88	High	High	High	High	High	High	High	High	High	High	High	High	High	High	High	High	P28652 [393-410]	P28652 3xPhospho [S397(99.5); T400(100); T401(100)]	7.3	100	1	264.7	249.1	206.9
FALSE	High	[K].FADSDADGD.[-]	O09126	Semaphorin-4D OS=Mus musculus GN=Sema4d PE=1 SV=2		0.886402	0.997311	0.0673405	0.160917	-0.09	0.03	-0.27	0.21	0.938	1.019	0.829	1.153	86.9	92.7	88.6	76.8	9.18	9.8	7.04	2.87	High	High	High	High	High	High	High	High	High	High	High	High	High	High	High	High	O09126 [853-861]	O09126 1xPhospho [S856(100)]	2.54	100	1	78.5	90.2	97
FALSE	High	[K].IDASKNEEDEGHSNSSPR.[H]	Q60668	Heterogeneous nuclear ribonucleoprotein D0 OS=Mus musculus GN=Hnrnpd PE=1 SV=2		0.452734	0.299818	0.690574	0.161432	0.05	0.18	0.05	0.18	1.035	1.135	1.038	1.131	254	245.4	288.2	254.9	6.54	11.89	5.62	4.48	High	High	High	High	High	High	High	High	High	High	High	High	High	High	High	High	Q60668 [68-85]	Q60668 1xPhospho [S83(99.6)]	7.16	100	1	286.4	252.4	249.7
FALSE	High	[K].SSPQPAAAAAR.[N]	Q7TNS5	Protein B630019K06Rik OS=Mus musculus GN=B630019K06Rik PE=1 SV=1		0.738986	0.789719	0.989312	0.161835	-0.19	-0.2	0.16	-0.55	0.878	0.869	1.115	0.685	19.4	22.1	16.9	24.6	20.1	13.46	21.39	17.17	High	High	High	High	High	High	High	High	High	High	High	High	High	High	High	High	Q7TNS5 [41-51]	Q7TNS5 1xPhospho [S42(100)]	1.19	100	1	19.5	25	15.3
FALSE	High	[R].IPNQFQGSPPAPSDESVKIEER.[E]	Q9R257	Heme-binding protein 1 OS=Mus musculus GN=Hebp1 PE=1 SV=2		0.968803	0.686857	0.0111786	0.161901	-0.04	-0.19	-0.62	0.38	0.97	0.877	0.652	1.306	12.1	12.5	10.6	8.1	12.13	8.43	14.49	20.08	High	High	High	High	High	High	High	High	High	High	High	High	High	High	High	High	Q9R257 [104-125]	Q9R257 1xPhospho [S111(100)]	3.32	100	1	10	12.5	11.8
FALSE	High	[R].RDSVLAASR.[D]	P11881	Inositol 1,4,5-trisphosphate receptor type 1 OS=Mus musculus GN=Itpr1 PE=1 SV=2		0.595484	0.999987	0.740754	0.162046	0.27	0.07	-0.36	0.69	1.202	1.047	0.781	1.612	69.3	57.6	72.5	45	11.33	24.58	23.43	21.01	High	High	High	High	High	High	High	High	High	High	High	High	High	High	High	High	P11881 [1586-1594]	P11881 1xPhospho [S1588(100)]	2.88	100	1	70	71.4	68.5
FALSE	High	[R].LTVEEATASVSEGGGLQGISMKDSDEEDEEDD.[-]	J3QJW3	Calcium-dependent secretion activator 1 OS=Mus musculus GN=Cadps PE=1 SV=1		0.208148	0.708817	0.0291621	0.163057	0.29	-0.16	0.4	-0.27	1.22	0.897	1.319	0.83	31.1	25.5	27.9	33.7	10.42	9.47	4.43	13.88	High	High	High	High	High	High	High	High	High	High	High	High	High	High	High	High	J3QJW3 [1325-1356]	J3QJW3 1xPhospho [T1331(98.9)]	7.26	100	1	30.8	31.5	25.4
FALSE	High	[R].DNLTLWTSDQQDEEAGEGN.[-]	P68510	14-3-3 protein eta OS=Mus musculus GN=Ywhah PE=1 SV=2		0.870178	0.264392	0.969965	0.163528	-0.01	-0.21	-0.04	-0.18	0.994	0.863	0.97	0.885	40.1	40.4	34.7	39.2	9.72	8.75	4.4	8.26	High	High	High	High	High	High	High	High	High	High	High	High	High	High	High	High	P68510 [228-246]		4.29	100	1	40.9	33.3	39.4
FALSE	High	[K].GSAEGSSDEEGKLVIDEPAK.[E]	P51859	Hepatoma-derived growth factor OS=Mus musculus GN=Hdgf PE=1 SV=2		0.679216	0.999971	0.657491	0.163909	0.01	-0.04	0.19	-0.22	1.005	0.975	1.139	0.859	57.5	57.2	56	65.2	12.98	15.03	8.3	5.02	High	High	High	High	High	High	High	High	High	High	High	High	High	High	High	High	P51859 [127-146]	P51859 2xPhospho [S132(100); S133(100)]	6.28	100	1	61.9	62.6	53.4
FALSE	High	[K].IEDVGSDEEDDSGKDKK.[K]	P11499	Heat shock protein HSP 90-beta OS=Mus musculus GN=Hsp90ab1 PE=1 SV=3		0.997359	0.655065	0.809811	0.164094	-0.04	-0.24	0.15	-0.43	0.972	0.848	1.11	0.743	73.9	76.1	62.7	84.4	27.69	14.34	14.74	10.54	High	High	High	High	High	High	High	High	High	High	High	High	High	High	High	High	P11499 [250-266]	P11499 1xPhospho [S255(100)]	2.89	100	1	85.9	98.6	63.7
FALSE	High	[K].SLENETLNKEEDCHSPTSKPPKPDQPLK.[V]	Q8BGD9	Eukaryotic translation initiation factor 4B OS=Mus musculus GN=Eif4b PE=1 SV=1		0.955341	0.9227	0.68561	0.164862	0.16	0.03	-0.18	0.38	1.12	1.025	0.88	1.304	28.3	25.2	29	22.2	12.94	14.64	9.91	24.81	High	High	High	High	High	High	High	High	High	High	High	High	High	High	High	High	Q8BGD9 [445-472]		4.64	100	1	21.8	29.3	27.8
FALSE	High	[K].EVEERSR.[EL]	E9Q9E1; E9PUL9	Eukaryotic translation initiation factor 4 gamma 1 OS=Mus musculus GN=Eif4g1 PE=1 SV=1 Traf2 and NCK-interacting protein kinase OS=Mus musculus GN=Tnik PE=1 SV=1	Shared	0.999695	0.736149	0.5718	0.164899	-0.03	0.26	-0.23	0.45	0.979	1.195	0.856	1.368	14.1	14.4	16.9	12.3	25.74	16.82	10.68	16.28	High	High	High	High	High	High	High	High	High	High	High	High	High	High	High	High	E9Q9E1 [1184-1190]; E9PUL9 [507-513]	E9Q9E1 1xPhospho [S1189(100)]; E9PUL9 1xPhospho [S512(100)]	1.36	100	2	10.9	14.4	20
FALSE	High	[K].YSDEQLNSGRQSPSQNER.[W]	B2RUG9	Adenomatosis polyposis coli OS=Mus musculus GN=Apc PE=1 SV=1		0.99798	0.626053	0.635894	0.165024	-0.04	0.21	-0.23	0.4	0.975	1.156	0.854	1.319	13.4	13.8	15.5	11.8	19.27	15.2	23.82	11.44	High	High	High	High	High	High	High	High	High	High	High	High	High	High	High	High	B2RUG9 [1029-1046]	B2RUG9 1xPhospho [S1040(100)]	2.4	100	1	10.2	14.2	16.4
FALSE	High	[R].SAAQQENSSPSR.[G]	Q8BI72	CDKN2A-interacting protein OS=Mus musculus GN=Cdkn2aip PE=1 SV=1		0.955918	0.993218	0.479221	0.165416	0	-0.14	0.33	-0.47	1.001	0.909	1.256	0.724	27.3	27.3	24.8	34.3	24.19	16.63	11.25	21.23	High	High	High	High	High	High	High	High	High	High	High	High	High	High	High	High	Q8BI72 [161-172]	Q8BI72 1xPhospho [S169(99.4)]	2.44	100	1	26.2	32.7	28.5
FALSE	High	[R].RLEDEQPPTLSPK.[K]	A0A087WQ41	Calcium-activated potassium channel subunit alpha-1 OS=Mus musculus GN=Kcnma1 PE=1 SV=1		0.956737	0.880932	0.235609	0.165525	-0.12	0.1	-0.3	0.28	0.92	1.072	0.814	1.211	105.9	115.2	113.6	93.8	7.52	14.93	10.92	7.73	High	High	High	High	High	High	High	High	High	High	High	High	High	High	High	High	A0A087WQ41 [697-709]	A0A087WQ41 2xPhospho [T705(100); S707(100)]	3.46	100	1	99.3	99.2	113
FALSE	High	[R].GSAPHSESDIPEQEEEILGSDDDEQEDPNDYCK.[G]	O70551	SRSF protein kinase 1 OS=Mus musculus GN=Srpk1 PE=1 SV=2		0.463595	0.936744	0.998381	0.165707	0.2	0.06	0.03	0.23	1.152	1.044	1.023	1.175	23.7	20.6	24.7	21	15.09	15.41	13.73	7.33	High	High	High	High	High	High	High	High	High	High	High	High	High	High	High	High	O70551 [32-64]	O70551 1xPhospho [S51(100)]	6.19	100	1	22.8	24.5	19.9
FALSE	High	[K].DVNAAIATIK.[T]	P05213	Tubulin alpha-1B chain OS=Mus musculus GN=Tuba1b PE=1 SV=2		0.999873	0.584027	0.814133	0.166447	-0.08	0.19	-0.13	0.23	0.944	1.139	0.916	1.175	24.8	26.3	28.3	24	17.35	10.05	7.87	11.19	High	High	High	High	High	High	High	High	High	High	High	High	High	High	High	High	P05213 [327-336]		3.24	100	1	22.1	27.1	22.7
FALSE	High	[-].MEQLSDEEIDHGAEEDSDKEDQDLDK.[M]	F2Z4B7	Protein Raph1 OS=Mus musculus GN=Raph1 PE=1 SV=1		0.999992	0.794846	0.582406	0.166577	0.02	-0.15	0.22	-0.34	1.017	0.902	1.161	0.79	51.9	51	46.8	59.3	18.8	11.05	10.95	9.09	High	High	High	High	High	High	High	High	High	High	High	High	High	High	High	High	F2Z4B7 [1-26]	F2Z4B7 1xAcetyl [N-Term]; 2xPhospho [S5(100); S17(100)]	3.91	100	1	57.3	63.1	47
FALSE	High	[K].KEPAISSQNSPEAREESSSSSNVSSR.[K]	E9PYD5	Transcription elongation factor A protein 1 OS=Mus musculus GN=Tcea1 PE=1 SV=1		0.999895	0.341642	0.972858	0.167069	0.04	0.35	-0.07	0.46	1.031	1.275	0.954	1.378	10.6	10.2	13.5	9.8	16.11	15.33	14	28.6	High	High	High	High	High	High	High	High	High	High	High	High	High	High	High	High	E9PYD5 [102-127]	E9PYD5 1xPhospho [S111(100)]	1.46	100	1	8.2	10.9	10.3
FALSE	High	[R].YFSGGESDTGSSAESSPFGSPLLSR.[S]	Q5HZI2	C2 calcium-dependent domain-containing protein 4C OS=Mus musculus GN=C2cd4cC2CD4 family PE=1 SV=1		0.66588	1	0.708078	0.167141	0.5	-0.16	-0.08	0.42	1.419	0.893	0.944	1.342	10.6	7.5	9.5	7.1	25.21	23.41	11.56	26.07	High	High	High	High	High	High	High	High	High	High	High	High	High	High	High	High	Q5HZI2 [207-231]	Q5HZI2 3xPhospho [T215(96.9); S217(96.9); S218(98.4)]	1.25	100	1	11.5	9.8	6.3
FALSE	High	[K].SLDSDESEDEDDDYQQK.[R]	Q3UHX2	28 kDa heat- and acid-stable phosphoprotein OS=Mus musculus GN=Pdap1 PE=1 SV=1		0.381207	0.929242	0.651657	0.167334	-0.1	0.07	0.09	-0.12	0.932	1.051	1.062	0.922	283.8	304.5	298.1	323.4	6.91	5.03	3.24	4.32	High	High	High	High	High	High	High	High	High	High	High	High	High	High	High	High	Q3UHX2 [57-73]	Q3UHX2 2xPhospho [S60(100); S63(100)]	7.38	100	1	280.7	286.9	279.3
FALSE	High	[K].GSRSEDSELPPQMASEGSR.[R]	O89032	SH3 and PX domain-containing protein 2A OS=Mus musculus GN=Sh3pxd2a PE=1 SV=2		0.971393	0.308796	0.830281	0.16752	0.09	-0.5	0.2	-0.6	1.065	0.707	1.145	0.658	8.8	8.3	6.2	9.5	7.18	13.18	33	20.92	High	High	High	High	High	High	High	High	High	High	High	High	High	High	High	High	O89032 [791-809]		1.83	100	1	8.9	9.3	7.8
FALSE	High	[R].QQAAYYAQTSPQGMPQHPPAPQGQ.[-]	A0A0G2JGW9	Far upstream element-binding protein 1 OS=Mus musculus GN=Fubp1 PE=1 SV=1		0.960533	0.938281	0.65184	0.168499	0.08	0.18	-0.15	0.41	1.058	1.132	0.901	1.328	17.5	16.5	19.8	14.9	9.08	7.45	24.97	14.18	High	High	High	High	High	High	High	High	High	High	High	High	High	High	High	High	A0A0G2JGW9 [620-643]		3.76	100	1	18.9	18.9	16.1
FALSE	High	[R].DASPGRGSHSQSSSPGALTLGR.[Q]	O88935	Synapsin-1 OS=Mus musculus GN=Syn1 PE=1 SV=2		0.380074	0.101994	0.548176	0.169118	-0.1	0.22	-0.06	0.18	0.936	1.163	0.959	1.135	54.6	58.4	63.5	56	3.92	13.44	8.07	6.17	High	High	High	High	High	High	High	High	High	High	High	High	High	High	High	High	O88935 [425-446]	O88935 2xPhospho [S427(99.3); S436(98.7)]	4.47	100	1	54.4	50.8	55.4
FALSE	High	[K].TDHGAEIVYKSPVVSGDTSPR.[H]	A0A0A0MQC7; B1AQW2	Microtubule-associated protein OS=Mus musculus GN=Mapt PE=1 SV=1 Microtubule-associated protein OS=Mus musculus GN=Mapt PE=1 SV=1	Shared	0.999835	0.300757	0.988869	0.169425	-0.09	0.79	0.05	0.65	0.938	1.731	1.034	1.571	25.4	27.1	43.9	28	44.34	36.44	18.03	21.59	High	High	High	High	High	High	High	High	High	High	High	High	High	High	High	High	A0A0A0MQC7 [678-698]; B1AQW2 [335-355]		6.34	100	2	24.6	23.3	26.2
FALSE	High	[K].VKEVHDELEDLPSPPPPLSPPPTTSPHK.[Q]	Q8BUV3	Gephyrin OS=Mus musculus GN=Gphn PE=1 SV=2		0.992349	0.561302	0.921949	0.169564	-0.14	0.43	-0.1	0.39	0.908	1.345	0.933	1.309	34.3	37.8	46.1	35.2	35.82	12.03	13.22	12.09	High	High	High	High	High	High	High	High	High	High	High	High	High	High	High	High	Q8BUV3 [176-203]	Q8BUV3 2xPhospho [S188(100); S194(100)]	7.31	100	1	59.9	28.5	35.7
FALSE	High	[K].SKPAGSDGERR.[G]	Q00PI9	Heterogeneous nuclear ribonucleoprotein U-like protein 2 OS=Mus musculus GN=Hnrnpul2 PE=1 SV=2		0.75432	0.987127	0.434193	0.170405	-0.15	0.03	0.42	-0.54	0.899	1.02	1.339	0.686	10.3	11.4	10.5	15.3	24.58	14.96	35.68	15.73	High	High	High	High	High	High	High	High	High	High	High	High	High	High	High	High	Q00PI9 [186-196]	Q00PI9 1xPhospho [S191(100)]	1.32	100	1	7.2	12.9	11.5
FALSE	High	[K].TLTEGDSPSPQ.[-]	Q60720	Cytochrome b561 OS=Mus musculus GN=Cyb561 PE=1 SV=2		0.947096	0.829401	0.83832	0.171797	0.02	0.13	0.02	0.13	1.015	1.091	1.013	1.093	34.7	34.2	37.9	34.7	18.44	3.53	8.63	14.38	High	High	High	High	High	High	High	High	High	High	High	High	High	High	High	High	Q60720 [240-250]	Q60720 2xPhospho [S246(100); S248(100)]	2.75	100	1	31	35.3	34.2
FALSE	High	[K].MSSSGAK.[E]	P16330	2',3'-cyclic-nucleotide 3'-phosphodiesterase OS=Mus musculus GN=Cnp PE=1 SV=3		0.883057	0.988405	0.31641	0.17262	0.05	-0.11	-0.76	0.71	1.035	0.929	0.589	1.634	29.1	28.1	27	16.5	20.89	40.77	41.63	20.72	High	High	High	High	High	High	High	High	High	High	High	High	High	High	High	High	P16330 [21-27]	P16330 1xPhospho [S22(100)]	1.62	100	1	28.3	28.6	42.2
FALSE	High	[R].HAFSPVASVESASGETLHSPK.[V]	P29699	Alpha-2-HS-glycoprotein OS=Mus musculus GN=Ahsg PE=1 SV=1		0.972696	0.197137	0.985413	0.173247	0.15	0.56	0.23	0.48	1.112	1.472	1.175	1.393	8.6	7.7	12.6	9.1	31.4	30.22	14.99	7.11	High	High	High	High	High	High	High	High	High	High	High	High	High	High	High	High	P29699 [302-322]	P29699 3xPhospho [S309(100); S312(100); S/T]	6.92	100	1	8.4	13.4	6.5
FALSE	High	[K].EHKENPELVDDLSPR.[R]	Q9QYX7	Protein piccolo OS=Mus musculus GN=Pclo PE=1 SV=4		0.998888	0.653475	0.645687	0.173472	-0.01	0.14	-0.1	0.23	0.995	1.099	0.933	1.172	42.9	43.1	47.2	40.3	10.45	9.93	5.63	8.77	High	High	High	High	High	High	High	High	High	High	High	High	High	High	High	High	Q9QYX7 [1427-1441]	Q9QYX7 1xPhospho [S1439(100)]	5.36	100	1	44.3	38.1	48.8
FALSE	High	[K].GYSSPEPDIQDSSGSEAQSVKPSTR.[R]	B9EJ86	Oxysterol-binding protein-related protein 8 OS=Mus musculus GN=Osbpl8 PE=1 SV=1		0.671869	0.99222	0.549841	0.173476	-0.39	0.2	0.35	-0.54	0.763	1.148	1.272	0.689	17.7	23.2	20.3	29.5	33.87	26.07	19.36	16.12	High	High	High	High	High	High	High	High	High	High	High	High	High	High	High	High	B9EJ86 [796-820]	B9EJ86 2xPhospho [S807(99); S808(99)]	3.65	100	1	18.7	16.8	14.8
FALSE	High	[R].TEEVLSPDGSPSKSPSK.[K]	Q9QYB5	Gamma-adducin OS=Mus musculus GN=Add3 PE=1 SV=2		0.999095	0.999935	0.23143	0.173663	-0.02	0.01	0.24	-0.25	0.988	1.005	1.178	0.842	28.3	28.6	28.4	33.7	12.51	18.35	7.67	10.18	High	High	High	High	High	High	High	High	High	High	High	High	High	High	High	High	Q9QYB5 [668-684]		1.6	100	1	25.6	32.9	26
FALSE	High	[K].IREEFPDR.[I]	Q9D6F9	Tubulin beta-4A chain OS=Mus musculus GN=Tubb4a PE=1 SV=3		0.70809	0.999943	0.705308	0.173922	-0.24	0.07	0.11	-0.27	0.849	1.048	1.077	0.827	14.3	16.9	15	18.1	26.73	6.78	13.05	14.62	High	High	High	High	High	High	High	High	High	High	High	High	High	High	High	High	Q9D6F9 [155-162]		1.84	100	1	12.2	11.5	16.7
FALSE	High	[R].FYYSSGSSSPTHAK.[S]	Q60771	Claudin-11 OS=Mus musculus GN=Cldn11 PE=1 SV=1		0.772484	0.876751	0.956035	0.174407	0.05	0.95	-0.02	1.02	1.039	1.933	0.987	2.034	62	59.6	119.8	58.9	84.04	9.47	38.68	25.83	High	High	High	High	High	High	High	High	High	High	High	High	High	High	High	High	Q60771 [190-203]	Q60771 1xPhospho [S198(99.6)]	2.94	100	1	231.5	59.3	54.4
FALSE	High	[R].GDNASPSPSGTPLVR.[A]	Q6NZR5	Protein Skiv2l OS=Mus musculus GN=Skiv2l PE=1 SV=1		0.999853	0.982332	0.271035	0.174866	0.07	-0.08	0.3	-0.3	1.052	0.946	1.227	0.811	16.7	15.9	15.8	19.5	20.05	18.61	11.28	12.07	High	High	High	High	High	High	High	High	High	High	High	High	High	High	High	High	Q6NZR5 [236-250]	Q6NZR5 2xPhospho [S240(100); S242(100)]	3.91	100	1	16.3	20	17.1
FALSE	High	[R].NDSIVTPSPPQAR.[V]	Q6PCP5	Mitochondrial fission factor OS=Mus musculus GN=Mff PE=1 SV=1		0.999807	0.968645	0.0739642	0.175203	0.02	-0.09	-0.3	0.22	1.013	0.937	0.814	1.166	58.8	58.1	55.1	47.2	13.8	2.73	2.81	16.85	High	High	High	High	High	High	High	High	High	High	High	High	High	High	High	High	Q6PCP5 [144-156]	Q6PCP5 3xPhospho [S146(100); T149(100); S151(100)]	5.25	100	1	56.8	60.9	65.6
FALSE	High	[R].DQNLPQILEESRSE.[-]	O54991	Contactin-associated protein 1 OS=Mus musculus GN=Cntnap1 PE=1 SV=2		0.999278	0.456778	0.845704	0.175252	0.02	0.17	-0.06	0.25	1.015	1.128	0.96	1.193	11.3	11.2	12.8	10.7	19.46	10.59	8.91	9.53	High	High	High	High	High	High	High	High	High	High	High	High	High	High	High	High	O54991 [1372-1385]	O54991 2xPhospho [S1382(100); S1384(100)]	2.74	100	1	8.7	10	12.9
FALSE	High	[R].TQESCGIAPLTPSQSPKPEAR.[A]	H7BX84	Heat shock 70 kDa protein 12B OS=Mus musculus GN=Hspa12b PE=1 SV=1		0.717821	0.715176	0.177451	0.176168	0.21	-0.32	0.34	-0.44	1.16	0.803	1.263	0.737	18.1	15.6	14.5	19.6	22.92	16.17	19.93	6.03	High	High	High	High	High	High	High	High	High	High	High	High	High	High	High	High	H7BX84 [32-52]	H7BX84 2xPhospho [T42(100); S46(99.5)]	6.07	100	1	13.1	21.8	15.8
FALSE	High	[K].QLVNNKDTTSFEDISPQGISDDSSTGSR.[V]	Z4YLN8	Girdin (Fragment) OS=Mus musculus GN=Ccdc88a PE=1 SV=7		0.871004	0.994825	0.370943	0.176581	0.12	-0.11	-0.34	0.35	1.09	0.924	0.788	1.277	15.2	14	14.1	11	20.48	16.59	13.52	6.71	High	High	High	High	High	High	High	High	High	High	High	High	High	High	High	High	Z4YLN8 [253-280]	Z4YLN8 2xPhospho [S267(100); T/S]	3.69	100	1	13.4	11.4	17.7
FALSE	High	[R].ANSQDSLASR.[D]	Q8C052	Microtubule-associated protein 1S OS=Mus musculus GN=Map1s PE=1 SV=2		0.406883	0.999679	0.958601	0.177022	-0.21	0.01	0.13	-0.33	0.864	1.007	1.095	0.795	64.7	74.8	65.1	81.9	14.29	10.89	22.66	7.93	High	High	High	High	High	High	High	High	High	High	High	High	High	High	High	High	Q8C052 [460-469]	Q8C052 1xPhospho [S462(100)]	2.83	100	1	71.3	77.4	58.6
FALSE	High	[K].KGDVEGSQSQDEGEGSGESER.[G]	Q9CW03	Structural maintenance of chromosomes protein 3 OS=Mus musculus GN=Smc3 PE=1 SV=2		0.829656	0.688463	0.26387	0.178103	0.12	-0.14	0.48	-0.5	1.089	0.909	1.399	0.708	10	9.2	9.1	12.8	14.98	8.83	24.19	23.32	High	High	High	High	High	High	High	High	High	High	High	High	High	High	High	High	Q9CW03 [1059-1079]	Q9CW03 1xPhospho [S1067(99.3)]	1.72	100	1	9.2	12.8	10.1
FALSE	High	[R].TDTAADGETSATESDQEEDAEIK.[A]	Q9WV92	Band 4.1-like protein 3 OS=Mus musculus GN=Epb41l3 PE=1 SV=1		0.999784	0.888434	0.431811	0.178216	0.03	-0.09	0.18	-0.24	1.02	0.941	1.132	0.849	110.4	108.2	103.9	122.4	18.65	8.66	11.21	9.35	High	High	High	High	High	High	High	High	High	High	High	High	High	High	High	High	Q9WV92 [534-556]	Q9WV92 2xPhospho [T545(99.6); T/S]	4.93	100	1	120.3	133.6	101.4
FALSE	High	[R].NYQQNYQNSESGEKNEGSESAPEGQAQQR.[R]	A2BGG7	Nuclease-sensitive element-binding protein 1 (Fragment) OS=Mus musculus GN=Ybx1 PE=1 SV=1		0.531156	0.0777328	0.77198	0.17825	-0.25	0.68	-0.26	0.69	0.838	1.602	0.832	1.613	7.5	9	12	7.5	29.69	21.13	25.55	20.33	High	High	High	High	High	High	High	High	High	High	High	High	High	Not Found	High	High	A2BGG7 [43-71]	A2BGG7 1xPhospho [S60(100)]	7.42	94	1	6.5	4.7	8.7
FALSE	High	[R].RHRSTSPSPSR.[L]	Q8K194	U4/U6.U5 small nuclear ribonucleoprotein 27 kDa protein OS=Mus musculus GN=Snrnp27 PE=1 SV=1		0.10862	0.681921	0.502802	0.178455	0.43	0.13	0.28	0.28	1.351	1.094	1.217	1.215	20.8	15.4	22.7	18.7	12.72	12.99	16.84	17.19	High	High	High	High	High	High	High	High	High	High	High	High	High	High	High	High	Q8K194 [56-66]	Q8K194 3xPhospho [S59(100); S65(99.2); T/S]	1.57	100	1	21.6	20	24.8
FALSE	High	[K].ATTDNSPSSKAEDGPAKEEPK.[Q]	P06837	Neuromodulin OS=Mus musculus GN=Gap43 PE=1 SV=1		0.695973	0.995912	0.568068	0.178712	0.31	0.02	-0.19	0.52	1.237	1.012	0.875	1.431	193.5	156.4	195.9	136.9	15.25	23.15	19.92	10.99	High	High	High	High	High	High	High	High	High	High	High	High	High	High	High	High	P06837 [137-157]	P06837 2xPhospho [S142(98.8); S/T]	5.34	100	1	212.6	187.3	200
FALSE	High	[R].GPPSPPAPVMHSPSRK.[M]	A0A0B4J1E2	SNW domain-containing protein 1 OS=Mus musculus GN=Snw1 PE=1 SV=1		0.807796	0.816088	0.972912	0.178772	-0.02	0.05	-0.12	0.16	0.989	1.037	0.918	1.117	33.6	34	34.8	31.2	8.41	13.93	7.56	3.36	High	High	High	High	High	High	High	High	High	High	High	High	High	High	High	High	A0A0B4J1E2 [221-236]	A0A0B4J1E2 2xPhospho [S224(100); S232(100)]	2.75	100	1	31.7	35.6	31.2
FALSE	High	[R].RFSSGGEEEDFDR.[S]	Q69ZX8	Actin-binding LIM protein 3 OS=Mus musculus GN=Ablim3 PE=1 SV=2		0.995402	0.948154	0.506538	0.179146	-0.01	0.05	-0.15	0.19	0.995	1.032	0.9	1.141	35.9	36.1	37.1	32.5	6.09	5.64	13.63	6.81	High	High	High	High	High	High	High	High	High	High	High	High	High	High	High	High	Q69ZX8 [500-512]	Q69ZX8 2xPhospho [S502(100); S503(100)]	2.02	100	1	37.1	33.3	38.2
FALSE	High	[R].EADEDSEPEREVR.[A]	Q3TIX9	U4/U6.U5 tri-snRNP-associated protein 2 OS=Mus musculus GN=Usp39 PE=1 SV=2		0.835997	0.910265	0.895045	0.179392	-0.07	-0.11	0.06	-0.24	0.951	0.925	1.04	0.846	32.6	34.2	30.1	35.6	9.87	12.33	7.67	19.26	High	High	High	High	High	High	High	High	High	High	High	High	High	High	High	High	Q3TIX9 [76-88]	Q3TIX9 1xPhospho [S81(100)]	3.06	100	1	28	35.1	34
FALSE	High	[K].SVPEKKEEDSSEDEKQGK.[K]	Q61687	Transcriptional regulator ATRX OS=Mus musculus GN=Atrx PE=1 SV=3		0.998595	0.917504	0.359348	0.179514	0.05	-0.05	0.19	-0.2	1.036	0.964	1.144	0.873	23.9	23.1	23	26.4	3.23	19.92	4.88	13.78	High	High	High	High	High	High	High	High	High	High	High	High	High	High	High	High	Q61687 [819-836]	Q61687 2xPhospho [S828(100); S829(100)]	2.06	100	1	23.9	23.8	23.2
FALSE	High	[R].RPSTSPDVLQGQPPR.[A]	F6SPK0	Ubiquitin-conjugating enzyme E2 J1 (Fragment) OS=Mus musculus GN=Ube2j1 PE=1 SV=1		0.691538	0.303306	0.874264	0.179689	0.11	0.26	0.16	0.21	1.078	1.198	1.117	1.156	18.8	17.4	22.5	19.5	18.36	6.64	6.09	12.52	High	High	High	High	High	High	High	High	High	High	High	High	High	High	High	High	F6SPK0 [208-222]	F6SPK0 1xPhospho [S210(99.3)]	1.8	100	1	15.2	17.5	20.1
FALSE	High	[K].KSKSPVDLRDK.[S]	Q61136	Serine/threonine-protein kinase PRP4 homolog OS=Mus musculus GN=Prpf4b PE=1 SV=3		0.747282	0.973882	0.411264	0.179782	-0.09	-0.04	0.18	-0.3	0.94	0.975	1.13	0.811	36.5	38.9	35.6	43.9	13.74	8.86	9.29	12.96	High	High	High	High	High	High	High	High	High	High	High	High	High	High	High	High	Q61136 [291-301]	Q61136 2xPhospho [S292(100); S294(100)]	1.76	100	1	27.9	38	35.1
FALSE	High	[R].LEEGVASDEEEAEGAEPGSAPGQEPEAPPPATPQ.[-]	A0A140LI60	Myosin-14 (Fragment) OS=Mus musculus GN=Myh14 PE=1 SV=1		0.62299	0.429602	0.298909	0.180142	-0.36	0.41	-0.44	0.49	0.781	1.324	0.735	1.408	14.2	18.2	18.8	13.4	16.85	16.42	18.55	32.11	High	High	High	High	High	High	High	High	High	High	High	High	High	High	High	High	A0A140LI60 [1212-1245]	A0A140LI60 2xPhospho [S1218(100); T1243(100)]	4.15	100	1	17	12	15.9
FALSE	High	[R].KTSQSEEEEPPR.[S]	Q8CJ19	Protein-methionine sulfoxide oxidase MICAL3 OS=Mus musculus GN=Mical3 PE=1 SV=2		0.372982	0.766424	0.475989	0.180176	-0.18	0.14	0.14	-0.18	0.885	1.101	1.101	0.885	19.3	21.8	21.2	24	9.01	13.5	11.19	6.73	High	High	High	High	High	High	High	High	High	High	High	High	High	High	High	High	Q8CJ19 [683-694]		1.24	100	1	18.5	21.4	17.4
FALSE	High	[R].AEIDSHSFGEKNSTLSEEDYIER.[R]	O55003	BCL2/adenovirus E1B 19 kDa protein-interacting protein 3 OS=Mus musculus GN=Bnip3 PE=1 SV=1		0.902373	0.802525	0.126384	0.180283	0.08	-0.19	-0.43	0.32	1.06	0.874	0.742	1.249	15	14.2	13.1	10.5	13.12	20.52	7.34	24.28	High	High	High	High	High	High	High	High	High	High	High	High	High	High	High	High	O55003 [73-95]	O55003 3xPhospho [S79(98.1); S85(98.1); S88(100)]	3.44	100	1	16.5	17	13
FALSE	High	[K].QAGSHSNSFR.[L]	Q91V35	Receptor-type tyrosine-protein phosphatase OS=Mus musculus GN=Ptpra PE=1 SV=1		0.115029	0.170229	0.122242	0.180372	0.39	-0.36	0.29	-0.25	1.311	0.782	1.22	0.839	37.7	28.8	29.5	35.1	14.19	17.57	11.71	10.77	High	High	High	High	High	High	High	High	High	High	High	High	High	High	High	High	Q91V35 [173-182]	Q91V35 1xPhospho [S180(99.7)]	3.52	100	1	40.7	35.6	39.9
FALSE	High	[R].QETVECLKK.[F]	P28652; Q5SVJ1	Calcium/calmodulin-dependent protein kinase type II subunit beta OS=Mus musculus GN=Camk2b PE=1 SV=2 Calcium/calmodulin-dependent protein kinase type II subunit beta OS=Mus musculus GN=Camk2b PE=1 SV=1	Shared	0.812072	0.986449	0.0740075	0.18168	-0.32	-0.03	-1.03	0.68	0.801	0.982	0.49	1.604	49.4	61.7	48.5	30.3	31.01	32.08	22.34	17.34	High	High	High	High	High	High	High	High	High	High	High	High	High	High	High	High	P28652 [285-293]; Q5SVJ1 [285-293]	P28652 1xPhospho [T287(100)]; Q5SVJ1 1xPhospho [T287(100)]	1.38	100	2	42.3	27.9	58
FALSE	High	[K].QLEYQQFEDDKLSQRSSSSK.[L]	Q9WV92	Band 4.1-like protein 3 OS=Mus musculus GN=Epb41l3 PE=1 SV=1		0.790129	0.994275	0.747653	0.182075	0.11	0.04	-0.1	0.25	1.081	1.029	0.932	1.193	231.7	214.4	238.4	199.8	9.49	13.01	12.74	3.41	High	High	High	High	High	High	High	High	High	High	High	High	High	High	High	High	Q9WV92 [84-103]	Q9WV92 2xPhospho [S96(100); S99(98.9)]	3.86	100	1	218.7	252.9	245.6
FALSE	High	[R].ADHGEPIGR.[G]	P11499	Heat shock protein HSP 90-beta OS=Mus musculus GN=Hsp90ab1 PE=1 SV=3		0.936197	0.145871	0.886174	0.18245	-0.1	-0.45	-0.11	-0.44	0.934	0.732	0.929	0.736	10.9	11.7	8	10.9	6.36	16.74	29.92	8.58	High	High	High	High	High	High	High	High	High	High	High	High	High	High	High	High	P11499 [169-177]		2.25	100	1	11.8	10.6	11.3
FALSE	High	[R].VDHGAEIITQSPSR.[S]	P20357	Microtubule-associated protein 2 OS=Mus musculus GN=Map2 PE=1 SV=2		0.940285	0.999846	0.0641311	0.182897	0.14	0.01	0.35	-0.2	1.103	1.006	1.273	0.872	83.6	75.8	84.1	96.5	3.28	15.24	5.57	14.13	High	High	High	High	High	High	High	High	High	High	High	High	High	High	High	High	P20357 [1773-1786]		4.88	100	1	84.2	83	80.2
FALSE	High	[K].LSQTASEDSDVFGEADAIQNNGTSAEDTAVTDSK.[H]	P04370	Myelin basic protein OS=Mus musculus GN=Mbp PE=1 SV=2		0.999997	0.995329	0.130816	0.183044	0	-0.01	-0.19	0.18	0.999	0.995	0.879	1.131	65.1	65.2	64.8	57.3	10.47	8.85	2.45	5.35	High	High	High	High	High	High	High	High	High	High	High	High	High	High	High	High	P04370 [35-68]	P04370 1xPhospho [S40(100)]	6.84	100	1	62.2	58.7	68.2
FALSE	High	[K].LSYASAESLETMSEAELPLGFSR.[M]	Q9QWI6	SRC kinase signaling inhibitor 1 OS=Mus musculus GN=Srcin1 PE=1 SV=2		0.998379	0.994628	0.207481	0.183343	-0.08	0.06	-0.28	0.27	0.948	1.045	0.823	1.205	19.9	20.9	20.8	17.2	19.38	18.54	12.46	13.99	High	High	High	High	High	High	High	High	High	High	High	High	High	High	High	High	Q9QWI6 [204-226]	Q9QWI6 2xPhospho [S208(100); S211(100)]	4.02	100	1	26.3	20.4	19.3
FALSE	High	[K].KPPAPPSPVQSQSPSTNWSPAVPAK.[K]	E9PUK6	Serine/arginine repetitive matrix protein 1 OS=Mus musculus GN=Srrm1 PE=1 SV=1		0.461404	0.949112	0.999013	0.183368	-0.19	-0.19	0.01	-0.4	0.874	0.877	1.01	0.759	16.9	19.3	14.8	19.5	27.52	9.45	10.75	11.34	High	High	High	High	High	High	High	High	High	High	High	High	High	High	High	High	E9PUK6 [781-805]	E9PUK6 3xPhospho [S787(100); S795(97.3); S/T]	3.28	100	1	16.2	17.5	20.9
FALSE	High	[K].RPSPDDDLTDEDNDDMQLQAQR.[A]	P46935	E3 ubiquitin-protein ligase NEDD4 OS=Mus musculus GN=Nedd4 PE=1 SV=3		0.0686842	0.453284	0.022116	0.184332	0.35	-0.2	0.57	-0.42	1.278	0.871	1.487	0.749	15.7	12.3	13.6	18.2	19.58	19.84	16.04	16.9	High	High	High	High	High	High	High	High	High	High	High	High	High	High	High	High	P46935 [279-300]	P46935 1xPhospho [T287(100)]	3.87	100	1	15.6	15.7	14.3
FALSE	High	[K].NSSAITSPK.[G]	P28652; Q5SVJ1	Calcium/calmodulin-dependent protein kinase type II subunit beta OS=Mus musculus GN=Camk2b PE=1 SV=2 Calcium/calmodulin-dependent protein kinase type II subunit beta OS=Mus musculus GN=Camk2b PE=1 SV=1	Shared	0.982521	0.490051	0.705433	0.184939	0.02	-0.1	0.22	-0.29	1.017	0.936	1.163	0.818	74.9	73.7	70.1	85.7	8.88	7.2	4.25	15.06	High	High	High	High	High	High	High	High	High	High	High	High	High	High	High	High	P28652 [361-369]; Q5SVJ1 [337-345]	P28652 1xPhospho [S367(100)]; Q5SVJ1 1xPhospho [S343(100)]	3.12	100	2	72.3	87.4	73.8
FALSE	High	[R].TPEELEDDSDFEQEDYDVR.[S]	E0CXB9	Catenin alpha-2 OS=Mus musculus GN=Ctnna2 PE=1 SV=1		0.731446	0.0842937	0.944384	0.185055	-0.08	0.21	-0.03	0.16	0.949	1.154	0.977	1.12	106.6	112.3	123.1	109.8	3.22	4.53	10.74	4	High	High	High	High	High	High	High	High	High	High	High	High	High	High	High	High	E0CXB9 [645-663]	E0CXB9 1xPhospho [S653(100)]	4.82	100	1	106.7	111.5	103.1
FALSE	High	[R].KESLSESRDLDGSYDQLTGHPPGPSK.[K]	Q3YAB2	Kv channel-interacting protein 2 OS=Mus musculus GN=Kcnip2 PE=1 SV=1		0.950634	0.181454	0.953905	0.185116	-0.03	0.28	-0.08	0.33	0.977	1.217	0.947	1.256	41	42	49.9	39.7	20.85	13.56	9.13	2.02	High	High	High	High	High	High	High	High	High	High	High	High	High	High	High	High	Q3YAB2 [7-32]	Q3YAB2 2xPhospho [S9(100); S/Y/T]	3.64	100	1	42.6	29.9	39.5
FALSE	High	[K].EVEDKESEGEEEDEDEDLSK.[Y]	E9PUD0	Zinc finger Ran-binding domain-containing protein 2 OS=Mus musculus GN=Zranb2 PE=1 SV=1		0.993234	0.786904	0.764801	0.185117	0.03	-0.18	0.16	-0.31	1.023	0.884	1.118	0.808	63.5	62	56.1	69.4	21.38	10.55	13.09	5.39	High	High	High	High	High	High	High	High	High	High	High	High	High	High	High	High	E9PUD0 [110-129]	E9PUD0 1xPhospho [S116(100)]	4.76	100	1	67.8	73.5	59.4
FALSE	High	[K].DSDDDDDVTVTVDRDR.[F]	O35526	Syntaxin-1A OS=Mus musculus GN=Stx1a PE=1 SV=3		0.903423	0.426663	0.594968	0.186092	0.18	-0.27	0.32	-0.41	1.129	0.83	1.246	0.752	25.6	22.7	21.2	28.2	22.42	25.21	19.48	10.64	High	High	High	High	High	High	High	High	High	High	High	High	High	High	High	High	O35526 [13-28]	O35526 1xPhospho [S14(100)]	2.53	100	1	34.6	27.3	24
FALSE	High	[R].GLASSPTGGALRPR.[R]	A0A0N4SVB5	Proline-rich transmembrane protein 3 OS=Mus musculus GN=Prrt3 PE=1 SV=1		0.513102	0.896794	0.0569136	0.186149	-0.21	0.15	-0.55	0.49	0.865	1.111	0.682	1.409	14.7	16.9	16.3	11.6	21.33	8.58	26.29	15.25	High	High	High	High	High	High	High	High	High	High	High	High	High	High	High	High	A0A0N4SVB5 [830-843]	A0A0N4SVB5 2xPhospho [S833(100); S834(100)]	1.21	100	1	17.5	10.8	16.4
FALSE	High	[K].EAFSLFDKDGDGTITTK.[E]	P62204	Calmodulin OS=Mus musculus GN=Calm1 PE=1 SV=2		0.947717	0.48004	0.618393	0.186432	-0.21	0.25	-0.3	0.34	0.865	1.186	0.81	1.266	41.9	48.5	49.7	39.3	25.38	14.76	17.68	15.57	High	High	High	High	High	High	High	High	High	High	High	High	High	High	High	High	P62204 [15-31]		3.63	100	1	37.7	31.6	46.7
FALSE	High	[K].DKVTDGISKSPEKR.[S]	P20357	Microtubule-associated protein 2 OS=Mus musculus GN=Map2 PE=1 SV=2		0.985496	0.872919	0.711675	0.186784	-0.02	-0.15	0.18	-0.35	0.985	0.9	1.129	0.785	54.5	55.4	49.1	62.5	24.17	11.66	10.81	15.17	High	High	High	High	High	High	High	High	High	High	High	High	High	High	High	High	P20357 [1530-1543]		1.84	100	1	38.2	57.6	51.6
FALSE	High	[R].SPFEIISPPASPPEMTGQR.[V]	A2ARP8	Microtubule-associated protein 1A OS=Mus musculus GN=Map1a PE=1 SV=1		0.610446	0.984897	0.597845	0.186897	-0.06	0.01	0.15	-0.2	0.962	1.004	1.107	0.872	98.4	102.3	98.8	113.3	8.21	7.82	8.69	4.98	High	High	High	High	High	High	High	High	High	High	High	High	High	High	High	High	A2ARP8 [2000-2018]	A2ARP8 2xPhospho [S2006(100); S2010(100)]	6.42	100	1	104.9	107.3	92.3
FALSE	High	[R].TTGSPDDR.[S]	F7AVU1	Cerebral cavernous malformations protein 2 homolog OS=Mus musculus GN=Ccm2 PE=1 SV=2		0.998497	0.998681	0.295783	0.187618	-0.14	-0.03	0.32	-0.49	0.91	0.979	1.248	0.714	31.6	34.7	30.9	43.3	20.99	26.79	12.65	19.34	High	High	High	High	High	High	High	High	High	High	High	High	High	High	High	High	F7AVU1 [350-357]	F7AVU1 1xPhospho [S353(99.6)]	1.76	100	1	32.7	39.9	30.5
FALSE	High	[K].AKFSIGSDEDDSPGLPVK.[A]	P16283	Anion exchange protein 3 OS=Mus musculus GN=Slc4a3 PE=1 SV=2		0.810201	0.298533	0.635018	0.187981	0.4	-0.68	0.38	-0.65	1.324	0.626	1.297	0.639	12.7	9.6	7.9	12.4	22.32	18.47	39.86	21.13	High	High	High	High	High	High	High	High	High	High	High	High	High	High	High	High	P16283 [164-181]	P16283 2xPhospho [S167(100); S170(100)]	4.11	100	1	13.7	12.2	8
FALSE	High	[K].QLDHESDDADREDEERSQDER.[E]	Q8BPN8	DmX-like protein 2 OS=Mus musculus GN=Dmxl2 PE=1 SV=3		0.919202	0.49705	0.549465	0.188287	0.09	-0.18	0.23	-0.32	1.062	0.885	1.175	0.8	24.4	23	21.6	27	5.02	16.05	6.45	11.86	High	High	High	High	High	High	High	High	High	High	High	High	High	High	High	High	Q8BPN8 [418-438]	Q8BPN8 1xPhospho [S423(100)]	4.32	100	1	24.4	26.1	24.4
FALSE	High	[K].ELSSEPRTPPAQK.[G]	A2ARP8	Microtubule-associated protein 1A OS=Mus musculus GN=Map1a PE=1 SV=1		0.999713	0.993224	0.243977	0.188368	-0.11	0.01	0.23	-0.34	0.925	1.004	1.175	0.79	35.6	38.5	35.7	45.2	15.19	18.31	16.58	17.27	High	High	High	High	High	High	High	High	High	High	High	High	High	High	High	High	A2ARP8 [735-747]	A2ARP8 1xPhospho [T742(100)]	2.46	100	1	36.2	31.1	35
FALSE	High	[R].AQNSTDSAAEEEEEAEAAAFPEAYR.[R]	A0A1B0GT88	Brain-enriched guanylate kinase-associated protein OS=Mus musculus GN=Begain PE=1 SV=1		0.79942	0.87027	0.959309	0.188433	-0.16	-0.11	0.3	-0.57	0.895	0.926	1.227	0.676	7.1	7.9	6.6	9.7	15.8	27.44	43.7	16.95	High	High	High	High	High	High	High	High	High	High	High	High	High	High	High	High	A0A1B0GT88 [483-507]		3.37	100	1	6.8	5.7	7.4
FALSE	High	[K].KLEKEEEEGISQESSEEEQ.[-]	P17095	High mobility group protein HMG-I/HMG-Y OS=Mus musculus GN=Hmga1 PE=1 SV=4		0.27692	0.0279238	0.868748	0.188485	-0.36	0.63	-0.16	0.43	0.78	1.547	0.896	1.347	11.6	14.9	18	13.4	27.96	5.34	22.06	9.67	High	High	High	High	High	High	High	High	High	High	High	High	High	High	High	High	P17095 [89-107]		2.83	100	1	8.3	15.2	9.8
FALSE	High	[R].SSGREEDEEELLR.[R]	E9Q030	Actin-binding LIM protein 1 OS=Mus musculus GN=Ablim1 PE=1 SV=1		0.999956	0.110335	0.991252	0.188589	0.03	-0.36	-0.08	-0.25	1.018	0.777	0.943	0.838	29.2	28.7	22.7	27.1	11.16	8.03	28.07	13.28	High	High	High	High	High	High	High	High	High	High	High	High	High	High	High	High	E9Q030 [354-366]		2.34	100	1	23.7	29.1	29.3
FALSE	High	[K].LKEDSEAESTESVPLVCK.[S]	Q8C419	Probable G-protein coupled receptor 158 OS=Mus musculus GN=Gpr158 PE=1 SV=2		0.798204	0.525606	0.373524	0.188606	-0.32	0.39	-0.34	0.41	0.799	1.31	0.79	1.325	15.2	19.1	20	15.1	18.16	19.08	14.65	10.07	High	High	High	High	High	High	High	High	High	High	High	High	High	High	High	High	Q8C419 [861-878]	Q8C419 1xPhospho [S869(99.4)]	2.56	100	1	14.5	15.8	20.9
FALSE	High	[R].SRGSPRYSPRHSR.[S]	H7BX95	Serine/arginine-rich-splicing factor 1 OS=Mus musculus GN=Srsf1 PE=1 SV=1		0.981168	0.0148029	0.286846	0.189181	0.11	0.45	0.23	0.32	1.076	1.362	1.17	1.252	19.5	18.1	26.5	21.2	15.47	6.62	10.58	17.6	High	High	High	High	High	High	High	High	High	High	High	High	High	High	High	High	H7BX95 [231-243]	H7BX95 3xPhospho [S238(100); S242(100); S/Y]	1.58	100	1	20.2	21.6	14.8
FALSE	High	[K].SGTSTPTTPGSTAITPGTPPSYSSR.[T]	P20357	Microtubule-associated protein 2 OS=Mus musculus GN=Map2 PE=1 SV=2		0.860896	0.99901	0.614395	0.189299	0.1	-0.02	-0.03	0.11	1.075	0.988	0.981	1.083	46.7	43.4	46.1	42.6	5.77	5.98	3.68	12.08	High	High	High	High	High	High	High	High	High	High	High	High	High	High	High	High	P20357 [1592-1616]	P20357 1xPhospho [T1609(100)]	5.21	100	1	42.5	48.7	46
FALSE	High	[R].QQTQQVQSPVDSATMSPVER.[T]	E9PW37	Protein Rasal2 OS=Mus musculus GN=Rasal2 PE=1 SV=1		0.909724	0.903549	0.842752	0.189425	-0.15	-0.28	0.17	-0.6	0.904	0.821	1.128	0.658	9	9.9	7.4	11.2	33.92	14.93	15.12	38.17	High	High	High	High	High	High	High	High	High	High	High	High	High	High	High	High	E9PW37 [1086-1105]	E9PW37 2xPhospho [S1093(100); T/S]	3.37	100	1	11.7	12	6.1
FALSE	High	[R].YSDDGNRETDER.[V]	E9QM90	Protein 2310035C23Rik OS=Mus musculus GN=2310035C23Rik PE=1 SV=2		0.119609	0.995385	0.951741	0.189961	-0.25	-0.03	-0.13	-0.16	0.84	0.979	0.916	0.897	12.5	14.9	12.2	13.6	4.55	12.38	6.69	17.44	High	High	High	High	High	High	High	High	High	High	High	High	High	High	High	High	E9QM90 [192-203]	E9QM90 1xPhospho [S193(100)]	1.62	100	1	12.6	12.3	12.9
FALSE	High	[R].ENVEYIEREESDGEYDEFGR.[K]	E9PUD0	Zinc finger Ran-binding domain-containing protein 2 OS=Mus musculus GN=Zranb2 PE=1 SV=1		0.844043	0.894333	0.917997	0.190051	-0.08	-0.06	0.14	-0.29	0.944	0.957	1.102	0.82	118.4	125.5	113.4	138.2	11.75	14.43	9.55	10.76	High	High	High	High	High	High	High	High	High	High	High	High	High	High	High	High	E9PUD0 [73-92]	E9PUD0 1xPhospho [S83(100)]	4.77	100	1	124.6	136.1	112.5
FALSE	High	[R].VKQEPPSPPHSPR.[V]	P38532	Heat shock factor protein 1 OS=Mus musculus GN=Hsf1 PE=1 SV=2		0.2634	0.919065	0.828601	0.190442	-0.29	0.09	0.26	-0.46	0.817	1.067	1.201	0.726	6.1	7.4	6.5	8.9	35.08	13.7	10.87	3.13	High	High	High	High	High	High	High	High	High	High	High	High	High	High	High	High	P38532 [297-309]	P38532 2xPhospho [S303(100); S307(100)]	1.95	100	1	5.4	9.2	3.9
FALSE	High	[R].NRGSPGGCSHDSR.[H]	Q8R0S4	Voltage-dependent L-type calcium channel subunit beta-4 OS=Mus musculus GN=Cacnb4 PE=1 SV=2		0.280385	0.639202	0.488809	0.190606	0.75	-0.47	-0.61	0.89	1.676	0.724	0.656	1.848	13.5	8	9.8	5.3	24.33	53.17	29.45	40.53	High	High	High	High	High	High	High	High	High	High	High	High	High	High	High	High	Q8R0S4 [504-516]	Q8R0S4 2xPhospho [S507(100); S515(100)]	1.66	100	1	19.5	12.7	14.4
FALSE	High	[R].SNSTETLSPAKSPSSSTGSIASSR.[K]	Q9R1V6	Disintegrin and metalloproteinase domain-containing protein 22 OS=Mus musculus GN=Adam22 PE=1 SV=2		0.999938	0.998187	0.227486	0.191492	-0.1	0.11	0.58	-0.58	0.93	1.081	1.498	0.671	56.8	61.1	61.4	91.6	32.92	24.23	7.99	16.44	High	High	High	High	High	High	High	High	High	High	High	High	High	High	High	High	Q9R1V6 [853-876]	Q9R1V6 3xPhospho [S855(97.7); S860(100); S864(100)]	8.16	100	1	52.7	57	56.7
FALSE	High	[R].SQSRSPDQR.[S]	P39447	Tight junction protein ZO-1 OS=Mus musculus GN=Tjp1 PE=1 SV=2		0.935631	0.95235	0.0303028	0.191556	0.03	0.05	0.48	-0.4	1.021	1.037	1.397	0.758	21.1	20.7	21.9	28.9	9.19	5.11	17.65	12.16	High	High	High	High	High	High	High	High	High	High	High	High	High	High	High	High	P39447 [311-319]	P39447 1xPhospho [S315(100)]	2.45	100	1	20.4	21.7	24.8
FALSE	High	[R].SLSSGFSPEEAQQQDEEFEK.[K]	P58871	182 kDa tankyrase-1-binding protein OS=Mus musculus GN=Tnks1bp1 PE=1 SV=2		0.999947	0.492013	0.874762	0.191704	-0.08	0.17	-0.3	0.39	0.947	1.125	0.811	1.314	11.5	12.1	12.9	9.8	19.34	20.71	5.85	11.37	High	High	High	High	High	High	High	High	High	High	High	High	High	High	High	High	P58871 [974-993]	P58871 2xPhospho [S980(100); S]	4.65	100	1	11.1	13.3	11.8
FALSE	High	[R].ELLNSLGGESSGGTTPVGSFHTEAAR.[W]	Q68FM7	Protein Arhgef11 OS=Mus musculus GN=Arhgef11 PE=1 SV=1		0.98159	0.746145	0.460123	0.192012	-0.04	0.31	-0.19	0.46	0.97	1.238	0.874	1.374	10.6	10.9	13.1	9.5	17.54	24.09	7.84	29.09	High	High	High	High	High	High	High	High	High	High	High	High	High	High	High	High	Q68FM7 [1478-1503]		2.51	100	1	13.8	9.9	9.5
FALSE	High	[K].ETIEQEKQAGES.[-]	P20065	Thymosin beta-4 OS=Mus musculus GN=Tmsb4x PE=1 SV=1		0.99743	0.344114	0.931519	0.192394	0.09	-0.16	0.13	-0.2	1.067	0.894	1.091	0.873	19.5	18.3	17.4	19.9	8.76	14.04	7.65	6.54	High	High	High	High	High	High	High	High	High	High	High	High	High	High	High	High	P20065 [39-50]	P20065 1xPhospho [S50(100)]	3.82	100	1	19.8	17.5	19.2
FALSE	High	[K].GNNSLER.[E]	O55176	E3 ubiquitin-protein ligase Praja-1 OS=Mus musculus GN=Pja1 PE=1 SV=3		0.413917	0.987615	0.995898	0.193249	-0.38	-0.09	-0.03	-0.45	0.768	0.937	0.982	0.733	20.9	27.2	19.5	26.7	27.72	20.08	11.39	18.08	High	High	High	High	High	High	High	High	High	High	High	High	High	High	High	High	O55176 [172-178]	O55176 1xPhospho [S175(100)]	1.27	100	1	22.7	28.8	19.2
FALSE	High	[R].RDSSDDWEIPDGQITVGQR.[I]	P28028; F6SZ47	Serine/threonine-protein kinase B-raf OS=Mus musculus GN=Braf PE=1 SV=3 Serine/threonine-protein kinase B-raf (Fragment) OS=Mus musculus GN=Braf PE=1 SV=1	Shared	0.999084	0.973664	0.0790121	0.194143	0	0.08	0.32	-0.23	1.001	1.06	1.247	0.85	14.1	14.1	14.9	17.6	7.18	18.19	12.37	7.75	High	High	High	High	High	High	High	High	High	High	High	High	High	High	High	High	P28028 [481-499]; F6SZ47 [428-446]	P28028 1xPhospho [S483(100)]; F6SZ47 1xPhospho [S430(100)]	5.43	100	2	12.7	15.2	13.9
FALSE	High	[K].LNKTDEEISS.[-]	O08599	Syntaxin-binding protein 1 OS=Mus musculus GN=Stxbp1 PE=1 SV=2		0.725223	0.876873	0.120524	0.194695	-0.02	-0.03	-0.29	0.24	0.987	0.981	0.819	1.184	61.6	62.4	60.5	51.1	17.84	6.03	13.68	6.76	High	High	High	High	High	High	High	High	High	High	High	High	High	High	High	High	O08599 [585-594]	O08599 1xPhospho [S593(99.7)]	3.02	100	1	57.8	44.3	67.2
FALSE	High	[K].ADTTTPTPTAILAPGSPASPPGSLEPK.[A]	I7HPW1	Bromodomain containing 2 (Fragment) OS=Mus musculus GN=Brd2 PE=1 SV=1		0.51233	0.689001	0.979125	0.194991	-0.08	-0.25	-0.02	-0.31	0.943	0.842	0.988	0.804	13.7	14.5	11.5	14.3	13.34	7.87	16.52	6.34	High	High	High	High	High	High	High	High	High	High	High	High	High	High	High	High	I7HPW1 [282-308]	I7HPW1 2xPhospho [S297(100); S300(100)]	2.67	100	1	13.1	14.4	14.4
FALSE	High	[R].IESPLETLSAQNHSASMTEVT.[-]	Q8BFZ2	Phospholipid phosphatase-related protein type 1 OS=Mus musculus GN=Plppr1 PE=1 SV=1		0.911174	0.546455	0.500032	0.195114	-0.12	0.22	-0.3	0.4	0.922	1.166	0.812	1.323	14.2	15.4	16.6	12.5	14.44	10.26	8.74	20.34	High	High	High	High	High	High	High	High	High	High	High	High	High	High	High	High	Q8BFZ2 [305-325]	Q8BFZ2 2xPhospho [S307(100); T311(98.6)]	1.66	100	1	15.1	12.9	17.6
FALSE	High	[R].MGQAGSTISNSHAQPFDFPDDSQNAK.[K]	P23242	Gap junction alpha-1 protein OS=Mus musculus GN=Gja1 PE=1 SV=2		0.998704	0.162532	0.999988	0.195558	0.06	0.3	-0.06	0.42	1.043	1.233	0.962	1.337	22.3	21.4	27.5	20.6	16.46	24.79	11.03	10.18	High	High	High	High	High	High	High	High	High	High	High	High	High	High	High	High	P23242 [320-345]		2.79	100	1	23.5	16	21.7
FALSE	High	[K].SDSASDSQEIK.[I]	O70311	Glycylpeptide N-tetradecanoyltransferase 2 OS=Mus musculus GN=Nmt2 PE=1 SV=1		0.674403	0.0664672	0.964388	0.197293	0.16	-0.38	0.08	-0.31	1.118	0.766	1.06	0.808	22.8	20.4	17.4	21.6	4.95	14.62	20.26	5.86	High	High	High	High	High	High	High	High	High	High	High	High	High	High	High	High	O70311 [66-76]	O70311 1xPhospho [S68(100)]	3.52	100	1	20.9	23.3	22.4
FALSE	High	[K].RRGSGSVDETLFALPAASEPVIPSSAEK.[I]	Q99P72	Reticulon-4 OS=Mus musculus GN=Rtn4 PE=1 SV=2		0.83522	0.782067	0.23152	0.197515	0.1	-0.09	0.16	-0.16	1.068	0.938	1.119	0.896	32.6	30.6	30.6	34.2	10.07	6.33	6.29	9.37	High	High	High	High	High	High	High	High	High	High	High	High	High	High	High	High	Q99P72 [162-189]		7.41	100	1	27.8	32.7	32.6
FALSE	High	[R].SISSDSSSSK.[K]	Q8BWS5	G protein-regulated inducer of neurite outgrowth 3 OS=Mus musculus GN=Gprin3 PE=1 SV=1		0.587731	0.773889	0.316959	0.197608	-0.32	0.08	0.41	-0.65	0.801	1.059	1.328	0.639	10.8	13.5	11.4	17.9	18.16	18.87	37.82	16.02	High	High	High	High	High	High	High	High	High	High	High	High	High	High	High	High	Q8BWS5 [721-730]	Q8BWS5 1xPhospho [S723(100)]	3.31	100	1	10.1	8.1	11.6
FALSE	High	[K].RLGELYSVGESDKET.[-]	P97291	Cadherin-8 OS=Mus musculus GN=Cdh8 PE=1 SV=2		0.962951	0.259545	0.990867	0.197657	0.01	0.26	-0.06	0.32	1.006	1.196	0.961	1.252	43.9	43.6	52.5	41.9	16.11	15.85	8.01	11.05	High	High	High	High	High	High	High	High	High	High	High	High	High	High	High	High	P97291 [785-799]	P97291 1xPhospho [S795(99.2)]	1.46	100	1	46.2	35.3	52
FALSE	High	[RK].TVSEIR.[SG]	P70704	Phospholipid-transporting ATPase IA OS=Mus musculus GN=Atp8a1 PE=1 SV=2		0.994328	0.999848	0.118884	0.197705	-0.01	-0.07	-0.96	0.88	0.995	0.951	0.516	1.834	64.8	65.1	61.6	33.6	33.15	32.5	33.67	19.14	High	High	High	High	High	High	High	High	High	High	High	High	High	High	High	High	P70704 [7-12]	P70704 1xPhospho [S9(100)]	1.96	100	1	83.2	60	70
FALSE	High	[R].RYVSSDGTEKEEVTMQGMPQEPVNIEDGDNYSK.[V]	Q8C8R3	Ankyrin-2 OS=Mus musculus GN=Ank2 PE=1 SV=2		0.203991	0.999827	0.999928	0.197998	0.58	-0.08	-0.03	0.53	1.495	0.947	0.982	1.441	10.8	7.2	10.2	7.1	18.64	31.63	20.31	36.22	High	High	High	High	High	High	High	High	High	High	High	High	High	High	High	High	Q8C8R3 [3847-3879]		3.54	100	1	12.4	9.5	9
FALSE	High	[R].SVSTSPSILPAYLK.[E]	Q8BWS5	G protein-regulated inducer of neurite outgrowth 3 OS=Mus musculus GN=Gprin3 PE=1 SV=1		0.793486	0.997474	0.523765	0.198085	0.19	0.03	-0.41	0.62	1.138	1.02	0.753	1.541	21.6	19	22	14.3	11.52	29.79	30.94	9.23	High	High	High	High	High	High	High	High	High	High	High	High	High	High	High	High	Q8BWS5 [323-336]	Q8BWS5 2xPhospho [S323(100); T326(99)]	2.88	100	1	23.9	19.5	23.8
FALSE	High	[K].VMDSDEDDADY.[-]	D3Z7Q5	Programmed cell death protein 5 OS=Mus musculus GN=Pdcd5 PE=1 SV=1		0.413293	0.996532	0.879675	0.198392	-0.27	0.05	0.19	-0.41	0.828	1.032	1.137	0.752	35.4	42.7	36.5	48.6	3.36	19.57	20.5	20.53	High	High	High	High	High	High	High	High	High	High	High	High	High	High	High	High	D3Z7Q5 [195-205]	D3Z7Q5 1xPhospho [S198(100)]	2.94	100	1	34.8	37.1	35.9
FALSE	High	[K].GSRTPSDR.[T]	Q810U4	Neuronal cell adhesion molecule OS=Mus musculus GN=Nrcam PE=1 SV=2		0.965532	0.74805	0.421571	0.198612	0.16	-0.2	0.46	-0.49	1.12	0.873	1.375	0.711	23	20.6	20.1	28.3	28.46	34.92	23.82	29.4	High	High	High	High	High	High	High	High	High	High	High	High	High	High	High	High	Q810U4 [1189-1196]	Q810U4 3xPhospho [S1190(100); T1192(100); S1194(100)]	1.68	100	1	25.9	31.8	16.3
FALSE	High	[R].SQSRSPDQR.[S]	P39447	Tight junction protein ZO-1 OS=Mus musculus GN=Tjp1 PE=1 SV=2		0.997793	0.997405	0.338185	0.198734	-0.06	0	0.22	-0.28	0.957	1.002	1.167	0.823	114.1	119.2	114.4	139.1	13.36	18.71	16.51	16.26	High	High	High	High	High	High	High	High	High	High	High	High	High	High	High	High	P39447 [311-319]	P39447 2xPhospho [S313(99.2); S315(100)]	2.73	100	1	116.2	132.3	112.1
FALSE	High	[K].ETESAPGSPR.[A]	Z4YJT3	La-related protein 1 OS=Mus musculus GN=Larp1 PE=1 SV=1		0.538259	0.922522	0.533849	0.198878	-0.19	0.12	0.19	-0.26	0.875	1.087	1.138	0.835	38.1	43.6	41.4	49.6	10.75	6.67	20.38	4.7	High	High	High	High	High	High	High	High	High	High	High	High	High	High	High	High	Z4YJT3 [491-500]	Z4YJT3 1xPhospho [S498(100)]	2.71	100	1	35.1	34.9	42.8
FALSE	High	[K].SGSGEMTSEGSHTK.[D]	A2RSJ4	UHRF1-binding protein 1-like OS=Mus musculus GN=Uhrf1bp1l PE=1 SV=2		0.816579	0.612674	1	0.198971	0.16	0.42	-0.01	0.6	1.12	1.34	0.993	1.511	13.6	12.1	18.2	12.1	32.37	19.71	19.63	28	High	High	High	High	High	High	High	High	High	High	High	High	High	High	High	High	A2RSJ4 [986-999]		2.56	100	1	20.9	15.3	12.1
FALSE	High	[R].DTASLSTTPSESPRAQATSR.[L]	Q8BUV3	Gephyrin OS=Mus musculus GN=Gphn PE=1 SV=2		0.998608	0.662105	0.847828	0.200034	0.04	-0.21	0.13	-0.3	1.029	0.865	1.095	0.812	42.6	41.4	36.8	45.3	6.61	18	17.38	8	High	High	High	High	High	High	High	High	High	High	High	High	High	High	High	High	Q8BUV3 [259-278]	Q8BUV3 2xPhospho [S268(97.7); S270(100)]	2.78	100	1	38.1	42.9	42.2
FALSE	High	[R].DLSPSEGDVAPPK.[R]	E9Q3M9	Protein 2010300C02Rik OS=Mus musculus GN=2010300C02Rik PE=1 SV=1		0.367828	0.981436	0.0217945	0.200547	0.31	-0.12	0.6	-0.41	1.239	0.917	1.512	0.751	14	11.3	12.9	17.1	9.11	14.01	25.53	10.72	High	High	High	High	High	High	High	High	High	High	High	High	High	High	High	High	E9Q3M9 [610-622]	E9Q3M9 1xPhospho [S612(100)]	3.62	100	1	14.5	15.4	13.5
FALSE	High	[R].EARSPQPNK.[R]	E9PUK6	Serine/arginine repetitive matrix protein 1 OS=Mus musculus GN=Srrm1 PE=1 SV=1		0.999999	0.99849	0.248949	0.200647	0.04	0.01	0.34	-0.28	1.032	1.01	1.269	0.821	20.9	20.2	21.1	25.6	10.46	9.63	18.15	13.49	High	High	High	High	High	High	High	High	High	High	High	High	High	High	High	High	E9PUK6 [691-699]	E9PUK6 1xPhospho [S694(100)]	2.18	100	1	17.3	21.4	20.3
FALSE	High	[R].SAEDLDLLNASFQDESK.[I]	F7BQW7	Synaptojanin-1 (Fragment) OS=Mus musculus GN=Synj1 PE=1 SV=1		0.626195	0.998176	0.712729	0.200882	0.17	-0.11	-0.28	0.34	1.126	0.926	0.822	1.268	10.1	9	9.4	7.4	13.88	23.16	23.01	33.02	High	High	High	High	High	High	High	High	High	High	High	High	High	High	High	High	F7BQW7 [835-851]	F7BQW7 1xPhospho [S845(100)]	2.5	100	1	11.8	9.3	11.1
FALSE	High	[K].KLEGNSPQGSSHGVK.[I]	P55258	Ras-related protein Rab-8A OS=Mus musculus GN=Rab8a PE=1 SV=2		0.905956	0.954536	0.157222	0.201021	-0.21	0.16	-0.42	0.37	0.864	1.115	0.745	1.293	40.6	47	45.3	35	7.48	18.58	13.44	4.07	High	High	High	High	High	High	High	High	High	High	High	High	High	High	High	High	P55258 [176-190]	P55258 2xPhospho [S181(100); S185(99.3)]	4.34	100	1	44.6	41.4	37.3
FALSE	High	[R].RSSEPSIDYLDTK.[L]	D3YUH8	Rho GTPase-activating protein 20 OS=Mus musculus GN=Arhgap20 PE=1 SV=1		0.237949	0.964276	0.0149343	0.201199	0.13	-0.01	0.33	-0.21	1.098	0.99	1.253	0.867	16.8	15.3	16.6	19.2	17.38	9.18	6.95	10.94	High	High	High	High	High	High	High	High	High	High	High	High	High	High	High	High	D3YUH8 [666-678]		1.59	100	1	14.8	17	21.9
FALSE	High	[K].TCVADESAANCDK.[S]	P07724	Serum albumin OS=Mus musculus GN=Alb PE=1 SV=3		0.932299	0.281447	0.843017	0.201202	0.16	-0.35	0.04	-0.24	1.114	0.784	1.029	0.85	25	22.4	19.6	23.1	15.97	4.48	7.81	7.01	High	High	High	High	High	High	High	High	High	High	High	High	High	High	High	High	P07724 [76-88]		2.24	100	1	24.7	25.3	25.7
FALSE	High	[K].ENSAAPSPGRPQSASPAKEEQK.[S]	Q9Z0P4	Paralemmin-1 OS=Mus musculus GN=Palm PE=1 SV=1		0.992364	0.858088	0.721079	0.201669	-0.18	0.11	0.2	-0.28	0.88	1.078	1.152	0.824	26.9	30.5	29	35.2	17.66	15.2	25.69	21.02	High	High	High	High	High	High	High	High	High	High	High	High	High	High	High	High	Q9Z0P4 [110-131]		1.96	100	1	27.9	36	25.8
FALSE	High	[R].LVLPMDDSEPALNSLDDTRHSPA.[-]	A1L3P4	Sodium/hydrogen exchanger OS=Mus musculus GN=Slc9a6 PE=1 SV=1		0.970502	0.979009	0.586098	0.202263	0	-0.1	0.15	-0.24	1.003	0.936	1.111	0.844	19.7	19.7	18.5	21.9	26.04	8.39	13.28	24.56	High	High	High	High	High	High	High	High	High	High	High	High	High	High	High	High	A1L3P4 [680-702]	A1L3P4 1xPhospho [S700(99.5)]	5.68	100	1	23.5	16.6	23.6
FALSE	High	[K].TAVAPIER.[V]	P48962; P51881	ADP/ATP translocase 1 OS=Mus musculus GN=Slc25a4 PE=1 SV=4 ADP/ATP translocase 2 OS=Mus musculus GN=Slc25a5 PE=1 SV=3	Shared	0.737063	0.490793	0.982352	0.20231	-0.09	-0.13	0	-0.22	0.941	0.911	0.999	0.858	27.4	29.1	24.9	29.1	12.7	11.45	9.6	7.97	High	High	High	High	High	High	High	High	High	High	High	High	High	High	High	High	P48962 [24-31]; P51881 [24-31]		1.32	100	2	24.6	26.5	28.2
FALSE	High	[R].DGSPTDR.[S]	Q8CFT0	RELT-like 2 OS=Mus musculus GN=Rell2 PE=1 SV=1		0.999346	0.9306	0.523499	0.202618	0.14	-0.39	0.18	-0.43	1.099	0.766	1.131	0.744	52.2	47.5	39.9	53.7	30.84	17.19	13.04	25.82	High	High	High	High	High	High	High	High	High	High	High	High	High	High	High	High	Q8CFT0 [185-191]	Q8CFT0 1xPhospho [S187(99.8)]	2.1	100	1	54.6	56.6	49.8
FALSE	High	[R].TDSREDEISPPPPNPVVK.[G]	A2AI69	cAMP-dependent protein kinase type I-alpha regulatory subunit OS=Mus musculus GN=Prkar1a PE=1 SV=1		0.99555	0.355951	0.998235	0.202915	0.07	-0.52	0.07	-0.52	1.049	0.695	1.047	0.697	19.5	18.5	13.5	19.4	25.72	12.77	22.48	16.57	High	High	High	High	High	High	High	High	High	High	High	High	High	High	High	High	A2AI69 [75-92]	A2AI69 2xPhospho [T75(99.6); S83(100)]	5.06	100	1	22.5	23	16.8
FALSE	High	[K].AGGANYDAQSE.[-]	Q9CQI6	Coactosin-like protein OS=Mus musculus GN=Cotl1 PE=1 SV=3		0.950799	0.981028	0.631199	0.203038	0.06	0.06	-0.1	0.23	1.044	1.045	0.933	1.17	97.8	93.6	102.2	87.3	12.62	7.08	6.64	6.28	High	High	High	High	High	High	High	High	High	High	High	High	High	High	High	High	Q9CQI6 [132-142]	Q9CQI6 1xPhospho [S141(100)]	3.5	100	1	106.8	110.8	85.8
FALSE	High	[K].INYTENR.[A]	P06745	Glucose-6-phosphate isomerase OS=Mus musculus GN=Gpi PE=1 SV=4		0.815793	0.779666	0.18338	0.20422	-0.11	0.08	0.13	-0.16	0.928	1.055	1.092	0.897	35	37.7	36.9	41.1	7.51	6.55	4.35	16.4	High	High	High	High	High	High	High	High	High	High	High	High	High	High	High	High	P06745 [90-96]		1.58	100	1	31.5	37.9	34.6
FALSE	High	[K].DGAELPDPDR.[M]	G3UZM4	Cell adhesion molecule 2 (Fragment) OS=Mus musculus GN=Cadm2 PE=1 SV=1		0.487399	0.893471	0.552426	0.205813	-0.16	0.03	0.21	-0.34	0.897	1.018	1.157	0.789	25.2	28.1	25.6	32.5	14.93	7.9	5.16	15.41	High	High	High	High	High	High	High	High	High	High	High	High	High	High	High	High	G3UZM4 [264-273]		1.61	100	1	25	25.4	19.2
FALSE	High	[K].NHPGSDTSPEAEASSGGGGVALK.[K]	Q9QXW9	Large neutral amino acids transporter small subunit 2 OS=Mus musculus GN=Slc7a8 PE=1 SV=1		0.999543	0.63118	0.858961	0.206089	-0.04	0.17	-0.05	0.18	0.973	1.125	0.967	1.132	35.2	36.2	39.6	35	14.34	7.94	5.67	11.16	High	High	High	High	High	High	High	High	High	High	High	High	High	High	High	High	Q9QXW9 [14-36]	Q9QXW9 3xPhospho [S27(100); S28(100); T/S]	4.23	100	1	33.2	31.7	43.4
FALSE	High	[K].KAEGAGTEEEGTPKESEPQAAADATEVK.[E]	Q91XV3	Brain acid soluble protein 1 OS=Mus musculus GN=Basp1 PE=1 SV=3		0.999101	0.213286	0.998581	0.206303	0.1	-0.41	0.01	-0.31	1.074	0.754	1.006	0.804	45.1	42	34	42.3	14.87	21.83	9.27	18.85	High	High	High	High	High	High	High	High	High	High	High	High	High	High	High	High	Q91XV3 [25-52]	Q91XV3 1xPhospho [T36(100)]	7.65	100	1	46.7	52	43.5
FALSE	High	[K].QKSDAEEDGVTGSQDEEDSKPK.[A]	P35564	Calnexin OS=Mus musculus GN=Canx PE=1 SV=1		0.781437	0.961302	0.906091	0.207819	-0.15	-0.06	0.09	-0.3	0.9	0.96	1.064	0.812	101	112.3	97	119.4	21.22	15.94	7.68	16.68	High	High	High	High	High	High	High	High	High	High	High	High	High	High	High	High	P35564 [551-572]	P35564 1xPhospho [S553(100)]	3.89	100	1	109.7	127.4	93
FALSE	High	[R].ANRADSEEEGAVELAA.[-]	O88485	Cytoplasmic dynein 1 intermediate chain 1 OS=Mus musculus GN=Dync1i1 PE=1 SV=2		0.634771	0.896804	0.99715	0.208338	0.09	0.08	-0.01	0.18	1.064	1.059	0.995	1.132	46.1	43.3	48.8	43.1	7.35	6.22	11.82	5.87	High	High	High	High	High	High	High	High	High	High	High	High	High	High	High	High	O88485 [613-628]	O88485 1xPhospho [S618(100)]	3.01	100	1	46.2	45.7	53
FALSE	High	[R].ESYSDSMHSYEEFSEPR.[A]	Q4KUS2	Protein unc-13 homolog A OS=Mus musculus GN=Unc13a PE=1 SV=3		0.932713	0.879237	0.867806	0.208476	0.1	0.31	-0.14	0.55	1.074	1.236	0.907	1.463	27.1	25.2	33.4	22.9	8.88	24.33	26.95	7.56	High	High	High	High	High	High	High	High	High	High	High	High	High	High	High	High	Q4KUS2 [236-252]	Q4KUS2 2xPhospho [S241(99.2); S244(100)]	4.01	100	1	30.2	25.9	28.2
FALSE	High	[K].SLSPAATVTAELHYEQGSPR.[N]	Q80X80	C2 domain-containing protein 2-like OS=Mus musculus GN=C2cd2l PE=1 SV=3		0.978636	0.894974	0.75071	0.209367	0.11	0.07	-0.15	0.33	1.079	1.05	0.9	1.258	103.3	95.7	108.4	86.2	9.75	22.89	7.74	14.48	High	High	High	High	High	High	High	High	High	High	High	High	High	High	High	High	Q80X80 [394-413]	Q80X80 2xPhospho [S411(100); S/T/Y]	8.61	100	1	111	87.6	104.6
FALSE	High	[R].NLGTPTSSTPRPSITPTKK.[I]	Q80X80	C2 domain-containing protein 2-like OS=Mus musculus GN=C2cd2l PE=1 SV=3		0.977041	0.881545	0.124353	0.209372	-0.07	0	-0.44	0.37	0.953	0.998	0.736	1.292	28	29.4	27.9	21.6	25.16	12.6	19.23	13.25	High	High	High	High	High	High	High	High	High	High	High	High	High	High	High	High	Q80X80 [414-432]	Q80X80 2xPhospho [T417(100); T428(95)]	2.62	100	1	28.3	27.7	43.5
FALSE	High	[K].QLVNNKDTTSFEDISPQGISDDSSTGSR.[V]	Z4YLN8	Girdin (Fragment) OS=Mus musculus GN=Ccdc88a PE=1 SV=7		0.847323	0.992054	0.438237	0.211542	-0.31	0.11	0.14	-0.34	0.807	1.077	1.099	0.791	8.1	10	8.7	11	9.59	30.38	13.65	21.1	High	High	High	High	High	High	High	High	High	High	High	High	High	High	High	High	Z4YLN8 [253-280]	Z4YLN8 1xPhospho [S262(99.4)]	3.19	100	1	7.3	7.5	8.8
FALSE	High	[R].LSSLRASTSK.[S]	P62754	40S ribosomal protein S6 OS=Mus musculus GN=Rps6 PE=1 SV=1		0.986852	0.999581	0.387865	0.211746	0.22	0.02	-0.54	0.77	1.164	1.013	0.69	1.709	51.2	44	51.8	30.3	36.32	50.65	36.61	20.29	High	High	High	High	High	High	High	High	High	High	High	High	High	High	High	High	P62754 [234-243]	P62754 2xPhospho [S240(100); S/T]	1.86	100	1	76.6	45.8	57.1
FALSE	High	[R].HVSFQDEDEIVR.[I]	Q924S8	Sprouty-related, EVH1 domain-containing protein 1 OS=Mus musculus GN=Spred1 PE=1 SV=1		0.96907	0.999147	0.332066	0.211821	0.11	-0.18	-0.99	0.92	1.082	0.88	0.504	1.89	17.3	16	15.2	8	37.96	47	54.08	23.7	High	High	High	High	High	High	High	High	High	High	High	High	High	High	High	High	Q924S8 [237-248]	Q924S8 1xPhospho [S239(100)]	3.72	100	1	18.7	9.5	25.5
FALSE	High	[K].RTEARSSDEENGPPSSPDLDR.[I]	F6R8S6	Proline-rich AKT1 substrate 1 (Fragment) OS=Mus musculus GN=Akt1s1 PE=1 SV=9		0.999805	0.341534	0.993822	0.211989	0.01	0.27	-0.07	0.36	1.009	1.209	0.95	1.285	34.6	34.3	41.9	32.6	14.7	7.45	12.73	13.47	High	High	High	High	High	High	High	High	High	High	High	High	High	High	High	High	F6R8S6 [204-224]	F6R8S6 2xPhospho [S219(100); T/S]	7.56	100	1	33.6	28.6	35.7
FALSE	High	[K].DLPDGHVAVSPR.[N]	E9Q5B0	Calmodulin-regulated spectrin-associated protein 3 OS=Mus musculus GN=Camsap3 PE=1 SV=1		0.237042	0.999915	0.999999	0.212291	-0.48	0.13	0.11	-0.45	0.718	1.094	1.077	0.73	13.4	18.6	14.6	20	25.11	23.59	21.66	17.57	High	High	High	High	High	High	High	High	High	High	High	High	High	High	High	High	E9Q5B0 [326-337]	E9Q5B0 1xPhospho [S335(100)]	3.26	100	1	12	19.3	14.9
FALSE	High	[K].YVEDTDGSSPEDLMAVLTGAEEK.[G]	Q9ES97	Reticulon-3 OS=Mus musculus GN=Rtn3 PE=1 SV=2		0.986044	0.995561	0.45741	0.212725	-0.07	0.06	0.2	-0.21	0.954	1.042	1.146	0.868	46.5	48.7	48.4	55.8	9.31	15.19	14.9	13.88	High	High	High	High	High	High	High	High	High	High	High	High	High	High	High	High	Q9ES97 [589-611]	Q9ES97 2xPhospho [S596(100); S597(100)]	5.86	100	1	44.2	43.6	48.9
FALSE	High	[K].SIDDEVVEQRSGSSTPQR.[S]	Q8BRK8	5'-AMP-activated protein kinase catalytic subunit alpha-2 OS=Mus musculus GN=Prkaa2 PE=1 SV=3		0.760192	0.906862	0.335179	0.21354	-0.41	0.25	0.18	-0.34	0.75	1.19	1.132	0.789	12.3	16.4	14.6	18.5	29.71	14.13	8.39	19.25	High	High	High	High	High	High	High	High	High	High	High	High	High	High	High	High	Q8BRK8 [471-488]	Q8BRK8 1xPhospho [S481(100)]	1.57	100	1	11.1	13.2	11.4
FALSE	High	[K].SADECDGGSTPRPPEDSLSGDSDVDTASTISLLSGK.[N]	Q80U49	Centrosomal protein of 170 kDa protein B OS=Mus musculus GN=Cep170b PE=1 SV=2		0.991909	0.999833	0.156317	0.214103	0.24	-0.01	0.93	-0.69	1.183	0.996	1.902	0.62	7.2	6.1	7.2	11.6	38.44	48.18	20.17	17	High	High	High	High	High	High	High	High	High	High	High	High	High	High	High	High	Q80U49 [926-961]		2.33	100	1	8.2	6.4	5.1
FALSE	High	[K].NTFTAWSEEDSDYEIDDRDVNK.[I]	Z4YJT3	La-related protein 1 OS=Mus musculus GN=Larp1 PE=1 SV=1		0.695384	0.57373	0.986622	0.214434	-0.32	-0.2	-0.14	-0.38	0.802	0.872	0.909	0.77	9.6	11.9	8.3	10.8	23.29	28.93	14.59	17.2	High	High	High	High	High	High	High	High	High	High	High	High	High	High	High	High	Z4YJT3 [598-619]	Z4YJT3 1xPhospho [S608(100)]	3.69	100	1	8.5	8.8	10.3
FALSE	High	[K].LDQPVSAPPSPR.[D]	D3YZP9	Coiled-coil domain-containing protein 6 OS=Mus musculus GN=Ccdc6 PE=1 SV=1		0.428942	0.910177	0.657883	0.214553	0.55	-0.12	-0.61	1.04	1.466	0.919	0.656	2.055	15	10.2	13.8	6.7	23.63	51.45	31.37	17.16	High	High	High	High	High	High	High	High	High	High	High	High	High	High	High	High	D3YZP9 [228-239]	D3YZP9 2xPhospho [S233(100); S237(100)]	5.16	100	1	14.5	15.6	18.1
FALSE	High	[K].QAGSHSNSFR.[L]	Q91V35	Receptor-type tyrosine-protein phosphatase OS=Mus musculus GN=Ptpra PE=1 SV=1		0.910713	0.600888	0.998557	0.214644	-0.22	-0.12	-0.03	-0.31	0.856	0.922	0.976	0.808	9.9	11.6	9.2	11.3	31.02	28.24	34.63	13.98	High	High	High	High	High	High	High	High	High	High	High	High	High	High	High	High	Q91V35 [173-182]	Q91V35 2xPhospho [S176(100); S180(99.3)]	2.45	100	1	12.2	13.7	7
FALSE	High	[R].YQDEDGPHDHSLPR.[L]	Q91XM9	Disks large homolog 2 OS=Mus musculus GN=Dlg2 PE=1 SV=2		0.0250539	0.999556	0.648791	0.214809	0.28	0	0.14	0.14	1.216	0.999	1.1	1.105	79.8	65.6	79.7	72.1	6.33	8.24	6.74	9.67	High	High	High	High	High	High	High	High	High	High	High	High	High	High	High	High	Q91XM9 [18-31]	Q91XM9 1xPhospho [S28(100)]	4.8	100	1	87	80.6	78.9
FALSE	High	[K].EYVSNDATQSDDEEKLQSQQTDTDGGR.[L]	Q6NVE8	WD repeat-containing protein 44 OS=Mus musculus GN=Wdr44 PE=1 SV=1		0.912801	0.999889	0.0841892	0.214984	0.28	-0.04	0.67	-0.43	1.216	0.971	1.588	0.743	12.7	10.4	12.3	16.6	22.9	23.32	10.91	16.85	High	High	High	High	High	High	High	High	High	High	High	High	High	High	High	High	Q6NVE8 [396-422]	Q6NVE8 1xPhospho [S405(100)]	6	100	1	15.3	12.4	8.5
FALSE	High	[K].TPTPLMANDSTETSEAGEEEEDHEGDSENKER.[M]	Q80TB8	Synaptic vesicle membrane protein VAT-1 homolog-like OS=Mus musculus GN=Vat1l PE=1 SV=2		0.999924	0.800455	0.624173	0.215814	0.12	-0.4	0.34	-0.61	1.089	0.76	1.262	0.655	10.4	9.6	7.9	12.1	15.57	25.75	27.37	22.58	High	High	High	High	High	High	High	High	High	High	High	High	High	High	High	High	Q80TB8 [381-412]		6.46	100	1	11.5	9.7	8.1
FALSE	High	[R].LPEEPSSEDEQQPEK.[K]	E9Q3I4	Intersectin-1 OS=Mus musculus GN=Itsn1 PE=1 SV=1		0.997984	0.704402	0.846933	0.216029	-0.03	-0.26	0.08	-0.37	0.98	0.835	1.056	0.775	43.1	44	36	46.5	15.14	11.54	18.36	10.75	High	High	High	High	High	High	High	High	High	High	High	High	High	High	High	High	E9Q3I4 [292-306]	E9Q3I4 2xPhospho [S297(100); S298(100)]	2.49	100	1	35.2	50.6	45.4
FALSE	High	[R].TFSATVR.[A]	Q9CR86	Calcium-regulated heat stable protein 1 OS=Mus musculus GN=Carhsp1 PE=1 SV=1		0.615532	0.947719	0.537397	0.216135	0.53	-0.22	-0.41	0.71	1.44	0.856	0.752	1.64	48.3	33.5	41.3	25.2	28.66	43.02	31.05	12.69	High	High	High	High	High	High	High	High	High	High	High	High	High	High	High	High	Q9CR86 [51-57]	Q9CR86 1xPhospho [S53(100)]	1.83	100	1	57.9	43.6	53.5
FALSE	High	[K].LGGRDSRSGSPMAR.[R]	F6VME3; F6RT34; F6ZIA4	Myelin basic protein (Fragment) OS=Mus musculus GN=Mbp PE=1 SV=1 Myelin basic protein (Fragment) OS=Mus musculus GN=Mbp PE=1 SV=1 Myelin basic protein (Fragment) OS=Mus musculus GN=Mbp PE=1 SV=1	Shared	0.550926	0.98637	0.719929	0.216317	0.28	-0.12	-0.38	0.54	1.216	0.918	0.767	1.455	15.7	13	14.5	9.9	26.01	37.25	31.25	35.74	High	High	High	High	High	High	High	High	High	High	High	High	High	High	High	High	F6VME3 [179-192]; F6RT34 [198-211]; F6ZIA4 [143-156]		1.47	100	3	12.7	13.5	21.9
FALSE	High	[R].SLDRPAKDSEGSSDSDADELATPYSNQGLDN.[-]	H3BKQ3	Protein Evi5l OS=Mus musculus GN=Evi5l PE=1 SV=1		0.690862	0.979953	0.935982	0.216333	0.25	-0.07	-0.21	0.39	1.189	0.953	0.864	1.311	13.5	11.3	12.8	9.8	22.88	23.57	14.45	24.07	High	High	High	High	High	High	High	High	High	High	High	High	High	High	High	High	H3BKQ3 [783-813]	H3BKQ3 3xPhospho [S791(97.5); S794(97.5); S795(97.5)]	4.85	100	1	9.2	11.9	15.3
FALSE	High	[R].AASMDNNSK.[F]	Q9R1E0	Forkhead box protein O1 OS=Mus musculus GN=Foxo1 PE=1 SV=2		0.997703	0.159437	0.999999	0.216352	-0.06	-0.46	-0.26	-0.26	0.957	0.729	0.837	0.834	10.5	10.9	7.6	9.2	14.17	13.16	31.66	27.69	High	High	High	High	High	High	High	High	High	High	High	High	High	High	High	High	Q9R1E0 [251-259]	Q9R1E0 1xPhospho [S253(100)]	1.99	100	1	9.2	10.2	12.9
FALSE	High	[R].GIMESPIVR.[S]	Q9WV34	MAGUK p55 subfamily member 2 OS=Mus musculus GN=Mpp2 PE=1 SV=1		0.168093	0.278566	0.218756	0.216771	-0.2	-0.17	-0.19	-0.17	0.873	0.889	0.874	0.889	20.9	23.9	18.5	20.9	11.43	8.89	9.33	9.54	High	High	High	High	High	High	High	High	High	High	High	High	High	High	High	High	Q9WV34 [38-46]	Q9WV34 1xPhospho [S42(100)]	1.21	100	1	17.7	21.9	23
FALSE	High	[R].GMYDGPVFDLTTTPKGGTPAGSTRGSPTRPNPPVR.[N]	E9PWE8	Dihydropyrimidinase-related protein 3 OS=Mus musculus GN=Dpysl3 PE=1 SV=1		0.992584	0.841719	0.766049	0.216919	0.02	0.4	-0.32	0.74	1.012	1.32	0.802	1.666	18.4	18.2	24.3	14.6	46.53	30.88	12.5	34.91	High	High	High	High	High	High	High	High	High	High	High	High	High	High	High	High	E9PWE8 [610-644]	E9PWE8 2xPhospho [S635(96.1); T/S/Y]	5.82	100	1	12	15.8	21.4
FALSE	High	[K].ATETAEEEDDQPLSLSWPTNTR.[K]	Q14BI1	Protein Slc24a2 OS=Mus musculus GN=Slc24a2 PE=1 SV=1		0.970061	0.62559	0.976124	0.21724	0.11	0.19	-0.03	0.33	1.077	1.144	0.977	1.261	30.3	28.1	34.6	27.4	14.2	14.63	17.98	6.55	High	High	High	High	High	High	High	High	High	High	High	High	High	High	High	High	Q14BI1 [497-518]	Q14BI1 1xPhospho [S510(99.6)]	5.59	100	1	33.7	23.7	30
FALSE	High	[K].KGSSEESVDEDRGLVPEPLPTAK.[A]	Q8C8R3	Ankyrin-2 OS=Mus musculus GN=Ank2 PE=1 SV=2		0.795109	0.585921	0.998989	0.21724	0.32	1.7	0.27	1.76	1.249	3.258	1.204	3.379	17.6	14.1	57.3	16.9	113.92	64.38	57	25.99	High	High	High	High	High	High	High	High	High	High	High	High	High	High	High	High	Q8C8R3 [1697-1719]	Q8C8R3 3xPhospho [S1699(100); S1700(100); S1703(100)]	5.55	100	1	101	20.8	14.8
FALSE	High	[K].ETQQEPGEESPVPSEEHLAPETK.[T]	E9Q8T1	Transforming acidic coiled-coil-containing protein 2 OS=Mus musculus GN=Tacc2 PE=1 SV=1		0.0669395	0.165005	0.456128	0.217695	-0.36	0.32	0.3	-0.34	0.78	1.248	1.235	0.788	13.7	17.5	17.1	21.7	21.7	15.99	17.68	9.13	High	High	High	High	High	High	High	High	High	High	High	High	High	High	High	High	E9Q8T1 [2048-2070]		1.49	100	1	13.4	14	9.5
FALSE	High	[R].TREQESSGEEDNDLSPEER.[E]	Q9DCL8	Protein phosphatase inhibitor 2 OS=Mus musculus GN=Ppp1r2 PE=1 SV=3		0.810589	0.668092	0.99999	0.218107	-0.09	-0.15	0.04	-0.28	0.939	0.901	1.028	0.823	48	51.1	43.2	52.5	12.63	17.55	5.14	7.45	High	High	High	High	High	High	High	High	High	High	High	High	High	High	High	High	Q9DCL8 [117-135]	Q9DCL8 2xPhospho [S122(99.5); S123(99.5)]	6.01	100	1	49	54.1	47
FALSE	High	[K].EKSPPDQSAVPNTPPSTPVKLEEDLPQEPTSR.[D]	Q9QYC0	Alpha-adducin OS=Mus musculus GN=Add1 PE=1 SV=2		0.463946	0.999967	0.928308	0.218215	-0.09	-0.02	0.06	-0.17	0.942	0.987	1.046	0.889	89.9	95.5	88.8	99.9	13.8	7.79	9.55	3.12	High	High	High	High	High	High	High	High	High	High	High	High	High	High	High	High	Q9QYC0 [598-629]	Q9QYC0 2xPhospho [T610(98.8); T614(98.8)]	6.54	100	1	95.5	98	84.7
FALSE	High	[R].FQKASPPSSPCLASPGPTAK.[K]	Q8BLQ7	Cationic amino acid transporter 4 OS=Mus musculus GN=Slc7a4 PE=1 SV=1		0.376288	0.905581	0.991732	0.21849	-0.23	-0.04	-0.05	-0.23	0.851	0.97	0.967	0.853	21.2	24.9	20.6	24.1	19.64	10.56	21.01	13.37	High	High	High	High	High	High	High	High	High	High	High	High	High	High	High	High	Q8BLQ7 [414-433]	Q8BLQ7 3xPhospho [S418(100); S427(100); S/T]	4.6	100	1	16.1	25.9	19.8
FALSE	High	[R].SQSLHSVGGTEDDSSCGSR.[R]	A0A0R4J0T9	Neuronal tyrosine-phosphorylated phosphoinositide-3-kinase adapter 2 OS=Mus musculus GN=Nyap2 PE=1 SV=1		0.34746	0.967026	0.860313	0.218935	0.53	-0.17	-0.15	0.51	1.448	0.89	0.904	1.426	8.8	6.1	7.8	5.5	11.24	37.6	26.13	31.92	High	High	High	High	High	High	High	High	High	High	High	High	High	High	High	High	A0A0R4J0T9 [118-136]		3.04	100	1	9.2	9.9	8.4
FALSE	High	[R].HDTPDTSPPR.[K]	Q8R149	BUD13 homolog OS=Mus musculus GN=Bud13 PE=1 SV=1		0.710329	0.652771	0.188446	0.219226	-0.12	0.15	0.22	-0.19	0.921	1.112	1.167	0.877	18.9	20.6	21	24	8.67	11.08	4.89	14.34	High	High	High	High	High	High	High	High	High	High	High	High	High	High	High	High	Q8R149 [129-138]; [155-164]	Q8R149 2xPhospho [T131(100); T/S]; 2xPhospho [T157(100); T/S]	4.05	100	1	19.1	22.2	18.6
FALSE	High	[K].VSEEDQSLENSEADVK.[E]	A2AJ26	ATP-binding cassette sub-family A member 2 OS=Mus musculus GN=Abca2 PE=1 SV=1		0.932812	0.976012	0.716577	0.21952	-0.07	0.09	-0.2	0.22	0.952	1.066	0.871	1.165	22.6	23.8	24.1	20.7	13.15	10.29	11.56	14.35	High	High	High	High	High	High	High	High	High	High	High	High	High	High	High	High	A2AJ26 [1320-1335]	A2AJ26 2xPhospho [S1326(100); S1330(100)]	2.92	100	1	22.2	22.9	28.8
FALSE	High	[R].SQSWEER.[G]	G3UYR9	PERQ amino acid-rich with GYF domain-containing protein 2 (Fragment) OS=Mus musculus GN=Gigyf2 PE=1 SV=1		0.981349	0.945173	0.673957	0.220369	-0.02	-0.11	0.09	-0.22	0.985	0.925	1.063	0.857	63.7	64.7	58.9	68.8	7.42	12.32	7.78	6.29	High	High	High	High	High	High	High	High	High	High	High	High	High	High	High	High	G3UYR9 [159-165]	G3UYR9 1xPhospho [S161(100)]	2.01	100	1	55.3	64.4	63.1
FALSE	High	[K].SEQPEEVLSSEEETAGVEHVR.[S]	Q3UU93	Receptor-type tyrosine-protein phosphatase N2 OS=Mus musculus GN=Ptprn2 PE=1 SV=1		0.991179	0.984808	0.509085	0.220438	-0.16	0.12	0.17	-0.22	0.893	1.087	1.128	0.861	16.3	18.2	17.7	20.5	15.44	15.98	19.7	10.51	High	High	High	High	High	High	High	High	High	High	High	High	High	High	High	High	Q3UU93 [414-434]		3.88	100	1	15.5	16	16.5
FALSE	High	[R].STEASPSRDASPVGLK.[I]	Q9JJV4	Voltage-dependent calcium channel gamma-4 subunit OS=Mus musculus GN=Cacng4 PE=1 SV=1		0.72911	0.422865	0.940445	0.220639	-0.08	-0.17	-0.05	-0.2	0.944	0.891	0.967	0.87	49.6	52.6	44.2	50.8	8.34	10.54	11.54	6.26	High	High	High	High	High	High	High	High	High	High	High	High	High	High	High	High	Q9JJV4 [249-264]	Q9JJV4 2xPhospho [S253(100); S259(100)]	3.3	100	1	54.4	44.6	50.9
FALSE	High	[R].GLVAAYSGDSDNEEELVER.[L]	Q91YE7	RNA-binding protein 5 OS=Mus musculus GN=Rbm5 PE=1 SV=1		0.944075	0.999042	0.540031	0.221248	0.08	0.06	-0.14	0.28	1.058	1.042	0.908	1.214	12.5	11.8	13.1	10.8	14.79	15.34	9.36	11.44	High	High	High	High	High	High	High	High	High	High	High	High	High	High	High	High	Q91YE7 [615-633]	Q91YE7 1xPhospho [S624(100)]	4.32	100	1	15.3	11.7	13.4
FALSE	High	[R].IVAPPGGR.[SA]	Q6P1J1; E9PWE8; O08553	Crmp1 protein OS=Mus musculus GN=Crmp1 PE=1 SV=1 Dihydropyrimidinase-related protein 3 OS=Mus musculus GN=Dpysl3 PE=1 SV=1 Dihydropyrimidinase-related protein 2 OS=Mus musculus GN=Dpysl2 PE=1 SV=2	Shared	0.990505	0.735068	0.567476	0.221728	-0.01	-0.08	0.11	-0.2	0.996	0.948	1.081	0.873	18.1	18.1	17.1	19.6	11.14	14.37	12.8	17.91	High	High	High	High	High	High	High	High	High	High	High	High	High	High	High	High	Q6P1J1 [672-679]; E9PWE8 [669-676]; O08553 [558-565]		1.07	100	3	15.4	18	20.3
FALSE	High	[K].SYPQTPPPSPSVDEPNMLVGK.[S]	B1ART2	Protein Vps13d OS=Mus musculus GN=Vps13d PE=1 SV=2		0.934521	0.999919	0.516616	0.222051	-0.17	0.11	0.45	-0.51	0.888	1.082	1.368	0.702	7.4	8.3	8	11.3	17.73	24.56	43.69	12.07	High	High	High	High	High	High	High	High	High	High	High	High	High	High	High	High	B1ART2 [1758-1778]	B1ART2 2xPhospho [T1762(100); S1766(99.1)]	2.16	100	1	7.2	7.5	6.1
FALSE	High	[K].GNKSPSPPPDGSPAATPEIR.[V]	Q6P1B9	Bin1 protein OS=Mus musculus GN=Bin1 PE=1 SV=1		0.987456	0.791155	0.492429	0.222251	0.11	-0.14	0.26	-0.29	1.081	0.906	1.195	0.819	158.4	146.5	143.5	175.1	17.44	12.2	7.71	9.49	High	High	High	High	High	High	High	High	High	High	High	High	High	High	High	High	Q6P1B9 [262-281]	Q6P1B9 3xPhospho [S265(100); S267(100); S273(100)]	5.76	100	1	174.7	185.6	143.6
FALSE	High	[R].SEALSSVLDQEEAMDTK.[E]	A2AU89	Tumor suppressor p53-binding protein 1 OS=Mus musculus GN=Trp53bp1 PE=1 SV=2		0.45249	0.538145	0.830785	0.223321	-0.34	-0.23	-0.26	-0.31	0.792	0.855	0.836	0.809	15	19	12.8	15.9	4.56	17.46	24.35	6.33	High	High	High	High	High	High	High	High	High	High	High	High	High	High	High	High	A2AU89 [627-643]	A2AU89 2xPhospho [S631(99.5); S632(99.5)]	3.43	100	1	14.8	14	15.5
FALSE	High	[K].SGPALPPEGTLARSPSIDSIQKDPR.[E]	O35927	Catenin delta-2 OS=Mus musculus GN=Ctnnd2 PE=1 SV=1		0.620957	0.994584	0.716234	0.223963	0.38	-0.2	-0.26	0.44	1.304	0.87	0.836	1.356	26.7	20.5	23.2	17.1	23.13	22.44	25.51	22.37	High	High	High	High	High	High	High	High	High	High	High	High	High	High	High	High	O35927 [516-540]	O35927 3xPhospho [S531(100); S534(100); T/S]	2.14	100	1	29.8	26	27.4
FALSE	High	[K].EEQELHDIHSTRSK.[E]	P35802	Neuronal membrane glycoprotein M6-a OS=Mus musculus GN=Gpm6a PE=1 SV=1		0.806589	0.965533	0.899336	0.22403	0.63	0.42	-0.38	1.42	1.543	1.334	0.767	2.682	114.1	73.9	152.1	56.7	79.82	14.75	50.17	11.42	High	High	High	High	High	High	High	High	High	High	High	High	High	High	High	High	P35802 [258-271]	P35802 2xPhospho [S267(100); T/S]	5.27	100	1	293.3	165.6	78.6
FALSE	High	[K].RSYSPDGKESPSDK.[K]	Q8K310	Matrin-3 OS=Mus musculus GN=Matr3 PE=1 SV=1		0.189645	0.838287	0.888049	0.225282	0.15	-0.01	-0.01	0.15	1.107	0.99	0.99	1.107	99.9	90.3	98.9	89.4	1.56	6.45	8.36	3.64	High	High	High	High	High	High	High	High	High	High	High	High	High	High	High	High	Q8K310 [595-608]	Q8K310 2xPhospho [S596(100); S598(100)]	3.21	100	1	102.5	98.9	99.6
FALSE	High	[K].TATPQQAQEVHEK.[L]	P17751	Triosephosphate isomerase OS=Mus musculus GN=Tpi1 PE=1 SV=4		0.807365	0.999998	0.0544371	0.22689	0.06	0.03	0.24	-0.16	1.039	1.02	1.185	0.894	16.1	15.5	16.4	18.3	11.35	8.69	4.77	12.98	High	High	High	High	High	High	High	High	High	High	High	High	High	High	High	High	P17751 [226-238]		3.56	100	1	16	15.2	16.1
FALSE	High	[R].RAPSPVVSPTELSK.[E]	Q80Z38	SH3 and multiple ankyrin repeat domains protein 2 OS=Mus musculus GN=Shank2 PE=1 SV=2		0.857392	0.132564	0.970122	0.227922	0.18	-0.43	0.13	-0.39	1.13	0.742	1.097	0.765	31.6	28	23.5	30.7	9.75	16.25	23.45	10.13	High	High	High	High	High	High	High	High	High	High	High	High	High	High	High	High	Q80Z38 [1331-1344]	Q80Z38 2xPhospho [S1334(100); S1338(100)]	4.28	100	1	31.5	35.3	31.8
FALSE	High	[K].AELEEMEEVHPSDEEEEETKAESFYQK.[H]	A2ARP8	Microtubule-associated protein 1A OS=Mus musculus GN=Map1a PE=1 SV=1		0.232218	0.55071	0.000778415	0.228139	0.14	0.07	0.32	-0.11	1.102	1.046	1.248	0.924	27.5	24.9	28.8	31.1	6.46	3.58	8.14	4.12	High	High	High	High	High	High	High	High	High	High	High	High	High	High	High	High	A2ARP8 [894-920]	A2ARP8 1xPhospho [S905(100)]	3.9	100	1	27.4	29.3	27.6
FALSE	High	[K].LGGDVSPTQIDVSQFGSFK.[E]	P14873	Microtubule-associated protein 1B OS=Mus musculus GN=Map1b PE=1 SV=2		0.96213	0.333888	0.875774	0.228599	0.07	-0.34	0.06	-0.33	1.048	0.792	1.042	0.796	38.8	37.1	30.7	38.6	12.94	17.89	9.21	16.62	High	High	High	High	High	High	High	High	High	High	High	High	High	High	High	High	P14873 [1492-1510]	P14873 1xPhospho [S1497(100)]	3.85	100	1	38	39.7	30.1
FALSE	High	[K].ATTDNSPSSK.[A]	P06837	Neuromodulin OS=Mus musculus GN=Gap43 PE=1 SV=1		0.801383	0.834153	0.20732	0.228952	0.25	-0.11	0.39	-0.26	1.187	0.924	1.312	0.837	77.4	65.2	71.6	85.6	20.28	20.19	17.68	16.79	High	High	High	High	High	High	High	High	High	High	High	High	High	High	High	High	P06837 [137-146]	P06837 1xPhospho [S142(100)]	2.8	100	1	77.2	97	77.7
FALSE	High	[R].KVAELEEEQSQGSSSYSDWVK.[N]	A2ARP8	Microtubule-associated protein 1A OS=Mus musculus GN=Map1a PE=1 SV=1		0.89627	0.559941	0.524764	0.229399	-0.03	0.15	-0.14	0.27	0.981	1.109	0.905	1.202	44.4	45.2	49.2	40.9	16.07	12.37	9.8	18.14	High	High	High	High	High	High	High	High	High	High	High	High	High	High	High	High	A2ARP8 [343-363]	A2ARP8 2xPhospho [S352(100); S355(99.3)]	4.6	100	1	32.6	46.2	47.8
FALSE	High	[K].EKEPAEGNESSEAPSPVNAMNSFV.[-]	Q810U4	Neuronal cell adhesion molecule OS=Mus musculus GN=Nrcam PE=1 SV=2		0.861407	0.672368	0.999508	0.23007	0.09	0.14	-0.1	0.34	1.066	1.102	0.93	1.264	11.1	10.4	12.3	9.7	16.18	21.8	10.7	25.58	High	High	High	High	High	High	High	High	High	High	High	High	High	High	High	High	Q810U4 [1233-1256]	Q810U4 3xPhospho [S1242(100); S1243(100); S]	2.73	100	1	12.5	8.5	11.7
FALSE	High	[R].ADSKESLKAAPK.[T]	A2ARP8	Microtubule-associated protein 1A OS=Mus musculus GN=Map1a PE=1 SV=1		0.976378	0.995953	0.299869	0.23025	0.2	-0.04	-0.74	0.89	1.151	0.97	0.601	1.859	50.9	44.2	49.3	26.5	31.37	38.43	30.36	17.43	High	High	High	High	High	High	High	High	High	High	High	High	High	High	High	High	A2ARP8 [555-566]	A2ARP8 2xPhospho [S557(100); S560(100)]	1.77	100	1	52.3	62.6	49.5
FALSE	High	[R].RVNSPESER.[L]	Q6PCN3	Tau-tubulin kinase 1 OS=Mus musculus GN=Ttbk1 PE=1 SV=3		0.563371	0.982122	0.986846	0.231341	-0.15	-0.06	0.03	-0.24	0.903	0.96	1.023	0.847	18	19.9	17.3	20.4	10.28	19.03	10.6	8.33	High	High	High	High	High	High	High	High	High	High	High	High	High	High	High	High	Q6PCN3 [453-461]	Q6PCN3 1xPhospho [S456(100)]	2.11	100	1	18.5	20.2	15.8
FALSE	High	[K].AEDGAAPSPSSETPK.[K]	P26645	Myristoylated alanine-rich C-kinase substrate OS=Mus musculus GN=Marcks PE=1 SV=2		0.889705	0.993718	0.431262	0.232722	0.08	-0.04	-0.16	0.2	1.057	0.971	0.893	1.15	50.1	47.5	48.7	42.4	12.64	10.63	6.56	13.86	High	High	High	High	High	High	High	High	High	High	High	High	High	High	High	High	P26645 [131-145]	P26645 2xPhospho [S138(100); T143(100)]	2.98	100	1	49.6	57.7	50.7
FALSE	High	[R].YAPTTTPSPEDGFEVQPLHPDK.[A]	E9Q517	Sodium- and chloride-dependent glycine transporter 1 OS=Mus musculus GN=Slc6a9 PE=1 SV=1		0.999961	0.981696	0.351573	0.232754	0.2	0.18	-0.81	1.19	1.151	1.131	0.572	2.278	11.8	10.3	13.4	5.9	35.02	19.7	37.64	33.82	High	High	High	High	High	High	High	High	High	High	High	High	High	Not Found	High	High	E9Q517 [481-502]	E9Q517 3xPhospho [T/S/Y]	1.92	94	1	15.1	11	12.6
FALSE	High	[K].IAVAAQNCYK.[V]	P17751	Triosephosphate isomerase OS=Mus musculus GN=Tpi1 PE=1 SV=4		0.0394676	0.520337	0.11301	0.232999	-0.36	-0.12	-0.25	-0.23	0.778	0.923	0.841	0.853	12.9	16.6	11.9	14	9.1	6.85	11.1	11.36	High	High	High	High	High	High	High	High	High	High	High	High	High	High	High	High	P17751 [110-119]		2.62	100	1	12	14.6	12.4
FALSE	High	[R].QETVDCLK.[K]	P11798; E9Q1W0	Calcium/calmodulin-dependent protein kinase type II subunit alpha OS=Mus musculus GN=Camk2a PE=1 SV=2 Calcium/calmodulin-dependent protein kinase type II subunit delta OS=Mus musculus GN=Camk2d PE=1 SV=2	Shared	0.719681	0.941936	0.106652	0.233236	-0.57	0	-1.25	0.68	0.674	0.999	0.419	1.608	22.9	34	22.9	14.3	48.82	40.63	50.11	43.54	High	High	High	High	High	High	High	High	High	High	High	High	High	High	High	High	P11798 [284-291]; E9Q1W0 [285-292]	P11798 1xPhospho [T286(100)]; E9Q1W0 1xPhospho [T287(100)]	3.28	100	2	24.9	10.9	39.2
FALSE	High	[R].ANSFVGTAQYVSPELLTEK.[S]	F2Z400	3-phosphoinositide-dependent protein kinase 1 OS=Mus musculus GN=Pdpk1 PE=1 SV=1		0.942615	0.988153	0.671213	0.233938	0.46	-0.02	-0.21	0.65	1.372	0.986	0.864	1.565	15.6	11.4	15.4	9.8	33.82	30.81	17.31	41.59	High	High	High	High	High	High	High	High	High	High	High	High	High	High	High	High	F2Z400 [242-260]	F2Z400 1xPhospho [S244(100)]	6.23	100	1	18	15	16.2
FALSE	High	[R].LIHGEDSDSEGDDDGRGSSGCSEAGGAGHEEGR.[A]	Q6ZPJ3	(E3-independent) E2 ubiquitin-conjugating enzyme UBE2O OS=Mus musculus GN=Ube2o PE=1 SV=3		0.663563	0.9587	0.0816909	0.234318	0.19	0.05	0.48	-0.24	1.14	1.038	1.398	0.846	8.5	7.5	8.8	10.4	8.6	9.07	25.94	23.09	High	High	High	High	High	High	High	High	High	High	High	High	High	High	High	High	Q6ZPJ3 [76-108]	Q6ZPJ3 3xPhospho [S82(100); S84(100); S]	2.89	100	1	8.6	8.1	8.4
FALSE	High	[K].TPPAANQASDPEEK.[G]	Q6W8Q3	Purkinje cell protein 4-like protein 1 OS=Mus musculus GN=Pcp4l1 PE=1 SV=1		0.939503	0.93735	0.23709	0.23453	-0.02	0.09	-0.22	0.29	0.986	1.064	0.858	1.223	18.4	18.7	19.6	16.1	8.02	6.48	12.12	13.36	High	High	High	High	High	High	High	High	High	High	High	High	High	High	High	High	Q6W8Q3 [8-21]		3.18	100	1	18.4	16	19.4
FALSE	High	[R].SATPATDGRATPATEESTVPATQSSALPAAK.[A]	A0A0A6YW88	CaM kinase-like vesicle-associated protein OS=Mus musculus GN=Camkv PE=1 SV=1		0.569811	0.988275	0.980195	0.234997	0.07	0.09	-0.04	0.2	1.047	1.063	0.97	1.148	13.9	13.3	14.8	12.9	18.81	15.33	9.41	16.54	High	High	High	High	High	High	High	High	High	High	High	High	High	High	High	High	A0A0A6YW88 [408-438]	A0A0A6YW88 1xPhospho [T418(99.1)]	4.49	100	1	13	13.4	14.4
FALSE	High	[R].TYTDAMQNYNGNDER.[S]	Q62283	Tetraspanin-7 OS=Mus musculus GN=Tspan7 PE=1 SV=2		0.853621	0.756457	0.995722	0.235215	0.23	0.2	0.02	0.41	1.173	1.146	1.014	1.326	14.2	12.1	16.2	12.2	15.91	18.53	20.05	13.34	High	High	High	High	High	High	High	High	High	High	High	High	High	High	High	High	Q62283 [123-137]		4.06	100	1	14.2	14.8	10.2
FALSE	High	[K].TRHSPTPQQSNR.[T]	E9PUK6	Serine/arginine repetitive matrix protein 1 OS=Mus musculus GN=Srrm1 PE=1 SV=1		0.970969	0.999421	0.48647	0.235422	0.35	0.17	-0.43	0.95	1.275	1.124	0.741	1.932	37	29	41.6	21.5	33.04	45.9	33.88	30.75	High	High	High	High	High	High	High	High	High	High	High	High	High	High	High	High	E9PUK6 [409-420]	E9PUK6 2xPhospho [S412(100); T414(100)]	2.33	100	1	45.3	38	36
FALSE	High	[R].LQHTGPADDGATRSPSIDSIQKDPR.[E]	Q68FH0	Plakophilin-4 OS=Mus musculus GN=Pkp4 PE=1 SV=1		0.999995	0.865626	0.598627	0.235544	0.19	0.32	-0.38	0.89	1.14	1.249	0.769	1.852	38.7	34	48.4	26.1	23.63	42.42	30.45	14.1	High	High	High	High	High	High	High	High	High	High	High	High	High	High	High	High	Q68FH0 [496-520]	Q68FH0 3xPhospho [S514(100); T/S]	5.16	100	1	43.8	38.7	38.7
FALSE	High	[R].SQSELDDQHDYDSVASDEDTDQEPLPSAGATRNNR.[A]	Q68FF6	ARF GTPase-activating protein GIT1 OS=Mus musculus GN=Git1 PE=1 SV=1		0.76897	0.835847	0.996669	0.236283	-0.01	-0.16	0.08	-0.26	0.99	0.893	1.06	0.834	33.2	33.5	29.6	35.5	12.3	22.19	13.68	13.15	High	High	High	High	High	High	High	High	High	High	High	High	High	High	High	High	Q68FF6 [382-416]	Q68FF6 1xPhospho [S394(97.9)]	3.02	100	1	28	33.3	33
FALSE	High	[R].TSPYGVPGSPATR.[V]	O88703	Potassium/sodium hyperpolarization-activated cyclic nucleotide-gated channel 2 OS=Mus musculus GN=Hcn2 PE=1 SV=1		0.604507	0.534493	0.922544	0.2364	0.24	0.31	0.15	0.4	1.178	1.241	1.107	1.32	14.2	12	17.6	13.3	19.68	15.14	17.49	3.26	High	High	High	High	High	High	High	High	High	High	High	High	High	High	High	High	O88703 [763-775]	O88703 2xPhospho [S771(100); T/S/Y]	3.91	100	1	11.3	13.7	18.1
FALSE	High	[R].GHPSAGAEEEGGSDGSAAEAEPR.[A]	Q8JZQ9	Eukaryotic translation initiation factor 3 subunit B OS=Mus musculus GN=Eif3b PE=1 SV=1		0.614515	0.994957	0.949036	0.236401	0.18	0.21	-0.1	0.48	1.129	1.157	0.934	1.399	55.9	49.5	64.7	46.3	24.82	9.43	28.59	7.25	High	High	High	High	High	High	High	High	High	High	High	High	High	High	High	High	Q8JZQ9 [108-130]	Q8JZQ9 2xPhospho [S120(100); S123(100)]	9.71	100	1	81.8	47.7	58.9
FALSE	High	[K].GFEEEHKDSDDDSSDDEQEKKPEAPK.[L]	Q3UJB0	Protein Sf3b2 OS=Mus musculus GN=Sf3b2 PE=1 SV=1		0.52441	0.645864	0.172541	0.237029	0.13	-0.14	0.31	-0.33	1.095	0.907	1.244	0.798	25.9	23.7	23.5	29.5	8.53	7.42	11.33	12.09	High	High	High	High	High	High	High	High	High	High	High	High	High	High	High	High	Q3UJB0 [406-431]	Q3UJB0 3xPhospho [S414(100); S418(100); S419(100)]	3.96	100	1	24.8	24.8	29.5
FALSE	High	[K].HANNTASMHR.[A]	P47746	Cannabinoid receptor 1 OS=Mus musculus GN=Cnr1 PE=1 SV=1		0.996754	0.999952	0.160703	0.237185	-0.03	-0.08	-0.62	0.51	0.983	0.946	0.651	1.429	105.8	107.7	100.2	70.1	10.15	23.21	27.2	26.01	High	High	High	High	High	High	High	High	High	High	High	High	High	High	High	High	P47746 [436-445]		2.63	100	1	106.6	86.9	110.1
FALSE	High	[K].NEPQNPGANSAR.[G]	Q9CQD1	Ras-related protein Rab-5A OS=Mus musculus GN=Rab5a PE=1 SV=1		0.415494	0.955471	0.0398434	0.237479	-0.29	0.12	-0.48	0.31	0.816	1.09	0.717	1.24	8.6	10.6	9.4	7.6	10.8	28.37	6.28	23.83	High	High	High	High	High	High	High	High	High	High	High	High	High	High	High	High	Q9CQD1 [184-195]	Q9CQD1 1xPhospho [S193(100)]	2.31	100	1	8.6	7.8	10.1
FALSE	High	[K].APAPAAPAAAEPQAEAPAAAASSEQSVAVKE.[-]	Q91XV3	Brain acid soluble protein 1 OS=Mus musculus GN=Basp1 PE=1 SV=3		0.991839	0.771281	0.567458	0.239206	-0.12	0.2	-0.28	0.36	0.923	1.148	0.826	1.282	11.5	12.5	13.2	10.3	7.82	21.99	14.39	11.3	High	High	High	High	High	High	High	High	High	High	High	High	High	High	High	High	Q91XV3 [196-226]		4.76	100	1	10.1	11.2	11.9
FALSE	High	[K].MYTQNNVQPYPVGDDEESESD.[-]	Q8BRU6	Synaptic vesicular amine transporter OS=Mus musculus GN=Slc18a2 PE=1 SV=1		0.744884	0.794665	0.00920087	0.239702	-0.07	-0.11	-0.36	0.19	0.951	0.93	0.777	1.137	41.6	43.8	38.7	34	8.27	10.81	1.91	13.24	High	High	High	High	High	High	High	High	High	High	High	High	High	High	High	High	Q8BRU6 [497-517]	Q8BRU6 1xPhospho [S514(99.5)]	5.04	100	1	44.5	37.6	39.4
FALSE	High	[K].GADSGGEKEEGANR.[E]	Q9D0B6	Protein PBDC1 OS=Mus musculus GN=Pbdc1 PE=1 SV=1		0.998356	0.497542	0.886584	0.240133	0.31	-0.95	0.16	-0.8	1.238	0.519	1.116	0.576	34	27.5	17.7	30.7	47.99	25.05	36.02	20.19	High	High	High	High	High	High	High	High	High	High	High	High	High	High	High	High	Q9D0B6 [181-194]	Q9D0B6 1xPhospho [S184(100)]	0.92	100	1	39.4	44	29.4
FALSE	High	[R].LIHGEDSDSEGDDDGR.[G]	Q6ZPJ3	(E3-independent) E2 ubiquitin-conjugating enzyme UBE2O OS=Mus musculus GN=Ube2o PE=1 SV=3		0.643141	0.740577	0.996491	0.240428	-0.05	-0.3	-0.03	-0.32	0.964	0.813	0.977	0.803	82.3	85.3	66.9	83.4	22.17	4.61	5.73	9.64	High	High	High	High	High	High	High	High	High	High	High	High	High	High	High	High	Q6ZPJ3 [76-91]	Q6ZPJ3 2xPhospho [S82(100); S84(100)]	6.27	100	1	51.3	81	83.6
FALSE	High	[K].RSSNPPAR.[S]	Q8BGD9	Eukaryotic translation initiation factor 4B OS=Mus musculus GN=Eif4b PE=1 SV=1		0.729809	0.518876	0.397768	0.241463	0.21	-0.26	0.3	-0.34	1.154	0.838	1.228	0.787	17.6	15.2	14.7	18.7	8.53	21.16	22.31	0.63	High	High	High	High	High	High	High	High	High	High	High	High	High	High	High	High	Q8BGD9 [487-494]	Q8BGD9 1xPhospho [S489(99.5)]	1.9	100	1	16.3	16.3	18.9
FALSE	High	[R].ESKSSDDIDYR.[G]	Q8BPN8	DmX-like protein 2 OS=Mus musculus GN=Dmxl2 PE=1 SV=3		0.531545	0.912068	0.999976	0.24159	-0.16	-0.2	-0.01	-0.35	0.896	0.872	0.994	0.787	23	25.7	20.1	25.5	22.47	17.36	12.27	8.49	High	High	High	High	High	High	High	High	High	High	High	High	High	High	High	High	Q8BPN8 [2704-2714]		1.4	100	1	24.3	27.3	21.8
FALSE	High	[K].AEENNSGVESSGYGSPGPTWDR.[G]	A0A0R4J2C3	ATP-dependent RNA helicase A OS=Mus musculus GN=Dhx9 PE=1 SV=1		0.982108	0.739685	0.928074	0.241931	0.09	-0.41	0.14	-0.46	1.066	0.752	1.1	0.729	33.4	31.3	25.1	34.5	28.67	6.35	17.96	23.08	High	High	High	High	High	High	High	High	High	High	High	High	High	High	High	High	A0A0R4J2C3 [122-143]	A0A0R4J2C3 1xPhospho [S136(100)]	6.62	100	1	18.1	32.9	34
FALSE	High	[K].ETAAAHQASSSPPIDAATAEPYGFR.[S]	P14873	Microtubule-associated protein 1B OS=Mus musculus GN=Map1b PE=1 SV=2		0.152781	0.934308	0.8102	0.242755	0.26	0.18	0.24	0.19	1.196	1.131	1.183	1.144	38.9	32.5	44	38.5	15.12	7.34	3	21.09	High	High	High	High	High	High	High	High	High	High	High	High	High	High	High	High	P14873 [1805-1829]		7.37	100	1	50.8	39.7	37.4
FALSE	High	[K].AYEAVSIEQDDSPSLELGR.[D]	Q80XG9	Leucine-rich repeat transmembrane neuronal protein 4 OS=Mus musculus GN=Lrrtm4 PE=1 SV=2		0.997246	0.960382	0.155379	0.242847	0.13	-0.02	0.54	-0.43	1.095	0.987	1.454	0.743	9.3	8.5	9.2	12.3	17.41	25.07	13.16	21.96	High	High	High	High	High	High	High	High	High	High	High	High	High	High	High	High	Q80XG9 [549-567]	Q80XG9 1xPhospho [S560(98.4)]	2.33	100	1	9.6	9.2	6.4
FALSE	High	[R].LTSIGSDEDEETETYQEK.[V]	Q924N4	Solute carrier family 12 member 6 OS=Mus musculus GN=Slc12a6 PE=1 SV=2		0.436184	0.975875	0.831778	0.242917	-0.15	0.02	0.01	-0.14	0.904	1.012	1.009	0.907	72.4	80.1	73.3	80.8	5.33	6.88	4.27	12.43	High	High	High	High	High	High	High	High	High	High	High	High	High	High	High	High	Q924N4 [1027-1044]	Q924N4 1xPhospho [S1032(100)]	6.09	100	1	74.9	70.8	66.5
FALSE	High	[R].QSLNSPSPGETEMDLLVTR.[E]	D3YZ21	Protein D430041D05Rik OS=Mus musculus GN=D430041D05Rik PE=1 SV=1		0.713699	0.0899668	0.970233	0.242985	0.14	-0.25	0.08	-0.19	1.1	0.838	1.055	0.874	20.8	18.9	17.4	19.9	9.06	7.01	5.56	10.17	High	High	High	High	High	High	High	High	High	High	High	High	High	High	High	High	D3YZ21 [1040-1058]	D3YZ21 1xPhospho [S1044(100)]	4.57	100	1	18.7	22.7	22
FALSE	High	[R].GRRSDSEGEQR.[Q]	Q9CS00	Cactin OS=Mus musculus GN=Cactin PE=1 SV=2		0.0882963	0.141814	0.156556	0.243116	0.39	-0.31	0.35	-0.26	1.31	0.809	1.272	0.834	18.3	14	14.8	17.8	14.67	15.66	11.01	11.91	High	High	High	High	High	High	High	High	High	High	High	High	High	High	High	High	Q9CS00 [77-87]	Q9CS00 2xPhospho [S80(100); S82(100)]	2.05	100	1	16.5	20.4	21.4
FALSE	High	[K].AGEARSPLEHSPSQADVK.[H]	Q920E3	Potassium voltage-gated channel subfamily H member 5 OS=Mus musculus GN=Kcnh5 PE=1 SV=3		0.99987	0.775521	0.692604	0.243505	0.04	0.18	-0.29	0.51	1.028	1.129	0.817	1.42	20.3	19.7	22.9	16.1	21.88	15.92	14.29	17.98	High	High	High	High	High	High	High	High	High	High	High	High	High	High	High	High	Q920E3 [878-895]	Q920E3 2xPhospho [S883(100); S888(100)]	4.82	100	1	22.9	17.9	15
FALSE	High	[K].STSPPPSPEVWAESR.[T]	Q9WV69	Dematin OS=Mus musculus GN=Dmtn PE=1 SV=1		0.85164	0.999581	0.583916	0.243548	0.07	0.03	-0.1	0.2	1.048	1.024	0.932	1.151	124.5	118.9	127.5	110.7	5.75	9.06	9.77	7.44	High	High	High	High	High	High	High	High	High	High	High	High	High	High	High	High	Q9WV69 [90-104]	Q9WV69 2xPhospho [S92(99.5); S96(100)]	4.64	100	1	130.1	118	131.9
FALSE	High	[K].LLESEKPNLQILGTNSFVK.[F]	Q6ZQ18	Protein EFR3 homolog B OS=Mus musculus GN=Efr3b PE=1 SV=2		0.733009	0.885626	0.995255	0.24371	-0.32	-0.06	0	-0.39	0.799	0.96	1.002	0.766	10.6	13.3	10.2	13.3	19.54	23.06	32.25	26.3	High	High	High	High	High	High	High	High	High	High	High	High	High	High	High	High	Q6ZQ18 [106-124]	Q6ZQ18 2xPhospho [S109(98.8); T/S]	1.8	100	1	10.6	10.6	10.2
FALSE	High	[R].SQADADFASEVMSVSDWEEFDNSSED.[-]	Q99JN2	Kelch-like protein 22 OS=Mus musculus GN=Klhl22 PE=1 SV=1		0.725069	0.454754	0.45882	0.244926	-0.27	0.33	-0.34	0.4	0.828	1.253	0.788	1.317	10.1	12.2	12.7	9.6	25.91	11.05	5.99	25.1	High	High	High	High	High	High	High	High	High	High	High	High	High	High	High	High	Q99JN2 [609-634]		1.88	100	1	11.2	8	14.2
FALSE	High	[R].SLMSSPEDLTK.[D]	P14873	Microtubule-associated protein 1B OS=Mus musculus GN=Map1b PE=1 SV=2		0.923582	0.602527	0.999531	0.245014	-0.2	-0.2	-0.14	-0.26	0.87	0.869	0.907	0.834	27.5	31.6	23.9	28.7	26.75	8.59	17.08	18.17	High	High	High	High	High	High	High	High	High	High	High	High	High	High	High	High	P14873 [825-835]	P14873 2xPhospho [S828(100); S829(100)]	4.11	100	1	38.6	31.4	21.5
FALSE	High	[R].IAVEYSDSEDDSEFDEVDWLE.[-]	Q8R5H6	Wiskott-Aldrich syndrome protein family member 1 OS=Mus musculus GN=Wasf1 PE=1 SV=2		0.51132	0.684938	0.944379	0.245305	-0.16	-0.09	-0.07	-0.18	0.896	0.94	0.952	0.885	10.9	12.2	10.3	11.6	7.42	8.37	15.45	8.01	High	High	High	High	High	High	High	High	High	High	High	High	High	High	High	High	Q8R5H6 [539-559]	Q8R5H6 1xPhospho [S544(100)]	2.9	100	1	12.2	10.3	10.7
FALSE	High	[K].VYVGNLGNNGNK.[T]	A2A4X6	MCG21910 OS=Mus musculus GN=Gm12355 PE=4 SV=1		1	0.528439	0.0246849	0.245716	0.17	0.05	0.52	-0.31	1.123	1.034	1.438	0.807	17.8	15.9	18.5	22.9	16.56	11.51	16.11	12.53	High	High	High	High	High	High	High	High	High	High	High	High	High	High	High	High	A2A4X6 [11-22]		3.68	100	1	18.1	17.6	12.7
FALSE	High	[R].DIISSDGDSS.[-]	Q8BLH7	HIRA-interacting protein 3 OS=Mus musculus GN=Hirip3 PE=1 SV=1		0.707934	0.59308	0.981482	0.246755	-0.26	-0.06	-0.03	-0.29	0.833	0.961	0.977	0.819	9.6	11.6	9.3	11.3	9.94	18.22	23.55	23.37	High	High	High	High	High	High	High	High	High	High	High	High	High	High	High	High	Q8BLH7 [592-601]	Q8BLH7 2xPhospho [S596(99.4); S]	2.01	100	1	9.8	9.5	9.5
FALSE	High	[R].SDGESDSPEKEAEFAPYPR.[M]	B2RUJ5	Amyloid beta A4 precursor protein-binding family A member 1 OS=Mus musculus GN=Apba1 PE=1 SV=2		0.4208	0.638179	0.416659	0.247127	-0.39	0.26	0.34	-0.48	0.761	1.198	1.27	0.718	28.4	37.3	34	47.3	14.55	24.93	26.67	10.83	High	High	High	High	High	High	High	High	High	High	High	High	High	High	High	High	B2RUJ5 [246-264]		1.92	100	1	28.4	28	28.3
FALSE	High	[K].KGSSDELQAEPEPSR.[W]	D3Z3B8	Disks large homolog 1 OS=Mus musculus GN=Dlg1 PE=1 SV=1		0.647414	0.822764	0.999888	0.247433	0.06	0.04	0.01	0.09	1.044	1.025	1.008	1.062	88.5	84.8	90.8	85.4	8.63	3.03	9.77	4.43	High	High	High	High	High	High	High	High	High	High	High	High	High	High	High	High	D3Z3B8 [38-52]	D3Z3B8 1xPhospho [S40(100)]	3.73	100	1	80.9	91	86.1
FALSE	High	[K].SENSSTQSSPEMPTTK.[N]	A2ALS7	Rap1 GTPase-activating protein 1 (Fragment) OS=Mus musculus GN=Rap1gap PE=1 SV=1		0.560019	0.999159	0.862933	0.24756	-0.38	-0.06	-0.05	-0.39	0.769	0.956	0.963	0.764	14.4	18.7	13.8	18	23.63	23.87	41.13	39.21	High	High	High	High	High	High	High	High	High	High	High	High	High	High	High	High	A2ALS7 [280-295]		3.66	100	1	8.6	14.5	14.3
FALSE	High	[R].WGQTLPTTSSTDEGNPK.[R]	E9PX29	Protein Sptbn4 OS=Mus musculus GN=Sptbn4 PE=1 SV=1		0.522914	0.999995	0.928049	0.247665	0.28	0.08	-0.07	0.44	1.214	1.061	0.95	1.355	18.2	15	19.3	14.3	14.42	12.12	20.93	13.94	High	High	High	High	High	High	High	High	High	High	High	High	High	High	High	High	E9PX29 [2532-2548]		1.86	100	1	17.3	21.6	19.2
FALSE	High	[K].QGRPSPTSPVKPSSPASKPDGQPELPLTDR.[E]	Q3UHC1	Protein Rapgef1 OS=Mus musculus GN=Rapgef1 PE=1 SV=1		0.199053	0.629296	0.0569682	0.248272	-0.47	0.37	-0.54	0.44	0.721	1.296	0.686	1.361	9.7	13.5	12.6	9.3	13.15	8.68	23.54	28.07	High	High	High	High	High	High	High	High	High	High	High	High	High	High	High	High	Q3UHC1 [226-255]	Q3UHC1 3xPhospho [S230(100); T/S]	1.62	100	1	9.4	9.8	9.7
FALSE	High	[K].ASVASDPESPPGGNEPAAASGQR.[L]	D3YYS7	mRNA cap guanine-N7 methyltransferase (Fragment) OS=Mus musculus GN=Rnmt PE=1 SV=1		0.851804	0.647619	0.415207	0.24836	0.07	-0.17	0.27	-0.37	1.052	0.889	1.209	0.773	16.6	15.8	14.7	19.1	30.65	18.03	3.83	10.81	High	High	High	High	High	High	High	High	High	High	High	High	High	High	High	High	D3YYS7 [7-29]	D3YYS7 1xPhospho [S15(100)]	4.92	100	1	17	12.7	16.2
FALSE	High	[R].QNSDPTSENPPLPTR.[I]	E9PUL9	Traf2 and NCK-interacting protein kinase OS=Mus musculus GN=Tnik PE=1 SV=1		0.986419	0.95816	0.668991	0.248495	-0.02	-0.05	0.11	-0.18	0.988	0.968	1.081	0.886	33.3	33.7	32.3	36.4	9.59	3.32	11.96	22.29	High	High	High	High	High	High	High	High	High	High	High	High	High	High	High	High	E9PUL9 [609-623]	E9PUL9 1xPhospho [S611(100)]	5.41	100	1	32.7	33.9	35.6
FALSE	High	[R].SQSELQSDDSEGAQPK.[S]	Q8K0T7	Protein unc-13 homolog C OS=Mus musculus GN=Unc13c PE=1 SV=3		0.99411	0.843962	0.517035	0.248884	0.07	-0.18	0.31	-0.42	1.053	0.88	1.238	0.749	13.1	12.4	11.5	15.4	19.74	13.58	21.47	15.7	High	High	High	High	High	High	High	High	High	High	High	High	High	High	High	High	Q8K0T7 [758-773]	Q8K0T7 2xPhospho [S764(100); S767(100)]	2.52	100	1	13	13.2	9.3
FALSE	High	[K].RLSLESEGANEGATAAPELSALEEAFR.[R]	Q7TQD2	Tubulin polymerization-promoting protein OS=Mus musculus GN=Tppp PE=1 SV=1		0.627227	0.997933	0.787454	0.249441	-0.15	0.01	0.21	-0.35	0.901	1.009	1.158	0.785	17.1	19	17.2	22	17.83	13.8	15.74	10.22	High	High	High	High	High	High	High	High	High	High	High	High	High	High	High	High	Q7TQD2 [29-55]	Q7TQD2 1xPhospho [S31(100)]	8.28	100	1	19	13.6	15.3
FALSE	High	[R].GGSPLTTTQGGSPTK.[L]	O35927	Catenin delta-2 OS=Mus musculus GN=Ctnnd2 PE=1 SV=1		0.996937	0.999645	0.377377	0.250422	-0.07	0.03	0.14	-0.18	0.952	1.022	1.1	0.885	36.3	38.1	37.1	41.9	12.77	4.75	7.23	22.21	High	High	High	High	High	High	High	High	High	High	High	High	High	High	High	High	O35927 [262-276]	O35927 2xPhospho [S264(100); S273(100)]	4.95	100	1	34	44.8	35.3
FALSE	High	[K].MESLGSPR.[T]	A2AU89	Tumor suppressor p53-binding protein 1 OS=Mus musculus GN=Trp53bp1 PE=1 SV=2		0.71923	0.992773	0.647759	0.250576	-0.14	0.04	0.18	-0.28	0.907	1.026	1.132	0.822	28.3	31.2	29.1	35.4	12.77	14.8	19.01	6.6	High	High	High	High	High	High	High	High	High	High	High	High	High	High	High	High	A2AU89 [528-535]	A2AU89 1xPhospho [S533(100)]	1.73	100	1	33.3	26.5	30.3
FALSE	High	[K].MLAESDDSGDEESVSQTDK.[T]	Q3B7Z2	Oxysterol-binding protein 1 OS=Mus musculus GN=Osbp PE=1 SV=3		0.828212	0.962904	0.416504	0.250791	-0.08	0.06	0.16	-0.18	0.943	1.045	1.12	0.88	20	21.2	20.9	23.7	7.71	14.44	17.31	6.03	High	High	High	High	High	High	High	High	High	High	High	High	High	High	High	High	Q3B7Z2 [184-202]	Q3B7Z2 1xPhospho [S191(100)]	3.74	100	1	17.3	20.5	20.4
FALSE	High	[R].GSSQPNLSTSYSEQEYGK.[A]	J3QNT7; Q8CHU3	Epsin-2 OS=Mus musculus GN=Epn2 PE=1 SV=1 Epsin-2 OS=Mus musculus GN=Epn2 PE=1 SV=1	Shared	0.942126	0.99988	0.555404	0.251857	0.08	0.07	-0.12	0.27	1.054	1.053	0.919	1.207	108	102.5	113.8	94.2	2.08	3.83	16.73	6.88	High	High	High	High	High	High	High	High	High	High	High	High	High	High	High	High	J3QNT7 [171-188]; Q8CHU3 [171-188]	J3QNT7 1xPhospho [S173(99.8)]; Q8CHU3 1xPhospho [S173(99.8)]	5.68	100	2	109.7	109.3	106.8
FALSE	High	[R].RESDESGESAPEEGGEGAR.[A]	Q3ZAQ4	Autophagy 9-like 1 protein OS=Mus musculus GN=Atg9a PE=1 SV=1		0.905189	0.711206	0.136356	0.251964	-0.05	0.13	0.66	-0.57	0.965	1.098	1.578	0.672	14	14.5	15.3	22.8	14.08	31.63	32.21	6.54	High	High	High	High	High	High	High	High	High	High	High	High	High	High	High	High	Q3ZAQ4 [733-751]	Q3ZAQ4 2xPhospho [S735(100); S738(100)]	5.47	100	1	13.8	11.2	14.1
FALSE	High	[R].SQSTTSDVPANYK.[V]	Q80VE5	Protein Tbc1d22b OS=Mus musculus GN=Tbc1d22b PE=1 SV=1		0.99991	0.901563	0.552104	0.252085	-0.13	0.29	-0.41	0.56	0.914	1.22	0.754	1.479	50.4	55.1	61.5	41.5	40.15	28.21	25.47	14.67	High	High	High	High	High	High	High	High	High	High	High	High	High	High	High	High	Q80VE5 [114-126]	Q80VE5 1xPhospho [S116(99.6)]	3.77	100	1	48.1	38.8	52.8
FALSE	High	[K].LDHELSLDRESEAGTGSSEHEDGEREGSPR.[T]	Q8BPN8	DmX-like protein 2 OS=Mus musculus GN=Dmxl2 PE=1 SV=3		0.830239	0.223684	0.86784	0.252421	-0.18	0.33	-0.05	0.2	0.88	1.254	0.964	1.145	16.2	18.4	20.3	17.7	17.28	10.11	12.37	16.27	High	High	High	High	High	High	High	High	High	High	High	High	High	High	High	High	Q8BPN8 [446-475]	Q8BPN8 1xPhospho [S473(94.9)]	2.53	100	1	15.1	15	17.4
FALSE	High	[K].EENQTGPTTTPSDTQDLDMK.[K]	Q9Z0P4	Paralemmin-1 OS=Mus musculus GN=Palm PE=1 SV=1		0.995324	0.777105	0.611496	0.252872	0.12	-0.23	0.11	-0.22	1.086	0.851	1.079	0.856	40.7	37.5	34.7	40.5	16.69	10.65	6.63	10.39	High	High	High	High	High	High	High	High	High	High	High	High	High	High	High	High	Q9Z0P4 [354-373]	Q9Z0P4 3xPhospho [T362(99.3); T363(100); S365(100)]	3.31	100	1	39	42.5	42.7
FALSE	High	[K].NDGVKESSESTNTTIEDEDTK.[V]	P11798	Calcium/calmodulin-dependent protein kinase type II subunit alpha OS=Mus musculus GN=Camk2a PE=1 SV=2		0.152839	0.299817	0.458972	0.25308	-0.16	0.17	0.07	-0.06	0.896	1.124	1.05	0.959	103.6	115.6	116.5	121.4	6.78	5.91	5.73	6.72	High	High	High	High	High	High	High	High	High	High	High	High	High	High	High	High	P11798 [324-344]	P11798 1xPhospho [S330(99.6)]	4.08	100	1	98.9	100	107.3
FALSE	High	[R].SDSAPPTPVNR.[L]	E9Q0J2	Ral GTPase-activating protein subunit beta OS=Mus musculus GN=Ralgapb PE=1 SV=1		0.645187	0.7471	0.99539	0.253268	0.1	0.09	0.03	0.17	1.072	1.068	1.019	1.124	58.1	54.1	62	55.1	9.84	8.68	8.16	8.79	High	High	High	High	High	High	High	High	High	High	High	High	High	High	High	High	E9Q0J2 [357-367]	E9Q0J2 2xPhospho [S359(100); T363(100)]	2.89	100	1	50.3	64.2	58
FALSE	High	[R].DALRSLTDLNQDPSR.[V]	Q7TME0	Phospholipid phosphatase-related protein type 4 OS=Mus musculus GN=Plppr4 PE=1 SV=2		0.920847	0.823355	0.351871	0.25439	-0.13	0.2	-0.21	0.28	0.911	1.151	0.863	1.217	25.4	27.8	29.2	24	14.48	14.94	11.09	21.89	High	High	High	High	High	High	High	High	High	High	High	High	High	High	High	High	Q7TME0 [343-357]	Q7TME0 1xPhospho [S347(100)]	2.43	100	1	22.5	28.6	22.5
FALSE	High	[K].GEIEQER.[LI]	Q3UHH0; A2ALL9; G5E829; S4R1C4	Calcium-transporting ATPase OS=Mus musculus GN=Atp2b2 PE=1 SV=1 Calcium-transporting ATPase OS=Mus musculus GN=Atp2b3 PE=1 SV=1 Plasma membrane calcium-transporting ATPase 1 OS=Mus musculus GN=Atp2b1 PE=1 SV=1 Calcium-transporting ATPase OS=Mus musculus GN=Atp2b2 PE=1 SV=1	Shared	0.999283	0.915578	0.499424	0.254964	0.15	-0.1	0.36	-0.32	1.106	0.931	1.286	0.801	12.5	11.3	11.6	14.5	15.16	24.48	27.63	18.71	High	High	High	High	High	High	High	High	High	High	High	High	High	High	High	High	Q3UHH0 [722-728]; A2ALL9 [745-751]; G5E829 [748-754]; S4R1C4 [726-732]		1.48	100	4	13.3	13.4	11.7
FALSE	High	[R].QGSFSEDVISHK.[G]	B1ARU4	Microtubule-actin cross-linking factor 1 OS=Mus musculus GN=Macf1 PE=1 SV=1		0.858681	0.976724	0.426235	0.255231	-0.17	0.01	0.11	-0.27	0.889	1.006	1.081	0.827	28	31.5	28.2	34	12.67	13.79	10.65	16.8	High	High	High	High	High	High	High	High	High	High	High	High	High	High	High	High	B1ARU4 [3885-3896]	B1ARU4 1xPhospho [S3887(99.7)]	2.9	100	1	26.9	32.1	23.8
FALSE	High	[R].VESTSGSECENPTK.[S]	Q5U4C1	G-protein coupled receptor-associated sorting protein 1 OS=Mus musculus GN=Gprasp1 PE=1 SV=1		0.991393	0.715373	0.927668	0.255443	-0.01	-0.1	0.21	-0.32	0.991	0.93	1.153	0.799	17.6	17.8	16.4	20.5	10.82	14.85	17.76	13.85	High	High	High	High	High	High	High	High	High	High	High	High	High	High	High	High	Q5U4C1 [291-304]	Q5U4C1 2xPhospho [S293(99.2); S295(99.2)]	2.42	100	1	18.4	16.9	15.9
FALSE	High	[R].GPAGSPCEEGDDVEEDGTSDLRDEASSVTR.[E]	G3X8T2	RIKEN cDNA 5830416A07, isoform CRA_c OS=Mus musculus GN=Zc3h18 PE=1 SV=1		0.88633	0.157073	0.977222	0.2556	0.35	-0.54	0.42	-0.61	1.274	0.687	1.337	0.655	10.3	8.1	7.1	10.8	30.21	25.36	30.79	25.02	High	High	High	High	High	High	High	High	High	High	High	High	High	High	High	High	G3X8T2 [88-117]	G3X8T2 3xPhospho [S92(100); T/S]	2.91	100	1	7.2	15	10.5
FALSE	High	[K].GEKHHSDSEEEKSHR.[R]	E9Q8K8	Zinc finger CCCH domain-containing protein 4 OS=Mus musculus GN=Zc3h4 PE=1 SV=1		0.971986	0.842792	0.893391	0.256316	-0.06	-0.13	0.15	-0.34	0.961	0.912	1.11	0.79	20.7	21.5	18.9	23.9	14.61	28.57	15.26	22.19	High	High	High	High	High	High	High	High	High	High	High	High	High	High	High	High	E9Q8K8 [38-52]	E9Q8K8 2xPhospho [S43(99.5); S]	2.3	100	1	19.4	23.2	16.6
FALSE	High	[K].KETAATTETPESTEASPSV.[-]	Q8R2P8	Lysine--tRNA ligase OS=Mus musculus GN=Kars PE=1 SV=1		0.999993	0.141457	0.982667	0.256805	-0.08	-0.33	-0.16	-0.26	0.945	0.793	0.898	0.835	12	12.7	9.5	11.4	14.35	12.93	15.56	14.63	High	High	High	High	High	High	High	High	High	High	High	High	High	High	High	High	Q8R2P8 [606-624]	Q8R2P8 2xPhospho [S617(99.5); S621(100)]	3.92	100	1	15.2	11.7	12.4
FALSE	High	[R].KETESEAEDDNLDDLER.[H]	E9PUK6	Serine/arginine repetitive matrix protein 1 OS=Mus musculus GN=Srrm1 PE=1 SV=1		0.928881	0.998171	0.457045	0.258082	0.05	0.15	-0.25	0.45	1.036	1.11	0.842	1.367	53.8	51.9	59.7	43.7	11.55	10.37	22.43	6.13	High	High	High	High	High	High	High	High	High	High	High	High	High	High	High	High	E9PUK6 [888-904]	E9PUK6 1xPhospho [S892(100)]	4.85	100	1	63.8	55.9	49.3
FALSE	High	[K].EMQDKAESESDGQAEETADPQSLHSGR.[S]	Z4YKC4	Eukaryotic translation initiation factor 4 gamma 3 OS=Mus musculus GN=Eif4g3 PE=1 SV=1		0.395169	0.0367879	0.063273	0.258431	0.16	0.7	0.51	0.35	1.115	1.628	1.426	1.273	8.2	7.4	13.4	10.5	22.98	11.52	16.52	17.23	High	High	High	High	High	High	High	High	High	High	High	High	High	High	High	High	Z4YKC4 [470-496]	Z4YKC4 2xPhospho [S477(100); S479(100)]	5.94	100	1	11.7	8.1	7.1
FALSE	High	[K].ESSDSTNTTIEDEDAK.[A]	P28652	Calcium/calmodulin-dependent protein kinase type II subunit beta OS=Mus musculus GN=Camk2b PE=1 SV=2		0.947687	0.956271	0.801674	0.258838	-0.02	-0.17	0.2	-0.39	0.987	0.888	1.146	0.765	165.3	167.5	146.8	191.9	18.55	15.86	13.96	10.31	High	High	High	High	High	High	High	High	High	High	High	High	High	High	High	High	P28652 [393-408]	P28652 2xPhospho [S397(99.3); T400(100)]	3.96	100	1	197.1	182.6	149.7
FALSE	High	[R].EAANEAGDSSQDEAEEDVK.[Q]	Q9CZT4	DNA-directed RNA polymerase III subunit RPC5 OS=Mus musculus GN=Polr3e PE=1 SV=2		0.351913	0.762767	0.639219	0.260706	-0.32	0.09	0.08	-0.31	0.801	1.064	1.06	0.804	13	16.2	13.9	17.2	13.25	13.61	19.11	16.9	High	High	High	High	High	High	High	High	High	High	High	High	High	High	High	High	Q9CZT4 [153-171]	Q9CZT4 2xPhospho [S161(100); S162(100)]	3.13	100	1	10.7	14.5	13.8
FALSE	High	[K].IEDVGSDEEDDSGKDK.[K]	P11499	Heat shock protein HSP 90-beta OS=Mus musculus GN=Hsp90ab1 PE=1 SV=3		0.926213	0.16282	0.990168	0.260789	0.4	-0.69	0.11	-0.4	1.315	0.619	1.076	0.757	59.3	45.1	36.7	48.5	29.15	20.05	18.28	16.67	High	High	High	High	High	High	High	High	High	High	High	High	High	High	High	High	P11499 [250-265]	P11499 2xPhospho [S255(100); S261(100)]	4.66	100	1	66.2	70.7	53.1
FALSE	High	[K].LEQEQEGEKDIATEKPGSPVK.[S]	Q9QYB8	Beta-adducin OS=Mus musculus GN=Add2 PE=1 SV=4		0.741785	0.616232	0.1886	0.261087	-0.26	0.31	0.34	-0.3	0.835	1.236	1.268	0.814	28.7	34.4	35.5	43.6	14.37	22.18	16.51	10.64	High	High	High	High	High	High	High	High	High	High	High	High	High	High	High	High	Q9QYB8 [577-597]	Q9QYB8 1xPhospho [S594(100)]	8.24	100	1	30.4	26.4	27.1
FALSE	High	[K].APEGEETEFYVSPEDLEAQLQSDER.[GE]	G5E8T0	DnaJ (Hsp40) homolog, subfamily C, member 5, isoform CRA_b OS=Mus musculus GN=Dnajc5 PE=1 SV=1		0.996354	0.996298	0.458676	0.261365	0.06	0.01	-0.11	0.18	1.042	1.008	0.924	1.136	28.2	27.1	28.4	25	14	5.8	6.74	18.46	High	High	High	High	High	High	High	High	High	High	High	High	High	High	High	High	G5E8T0 [140-164]	G5E8T0 1xPhospho [S151(100)]	7.16	100	1	33.5	28.9	27.6
FALSE	High	[R].AVSEEGNDSAGGAALK.[A]	E9PVU7	Phosphodiesterase OS=Mus musculus GN=Pde4d PE=1 SV=1		0.992969	0.565574	0.812756	0.26208	0.11	-0.22	0.2	-0.31	1.078	0.86	1.147	0.808	80.9	75.1	69.6	86.1	14.46	13.49	12.36	13.69	High	High	High	High	High	High	High	High	High	High	High	High	High	High	High	High	E9PVU7 [12-27]	E9PVU7 1xPhospho [S14(100)]	4.99	100	1	89.9	93.2	72.9
FALSE	High	[K].TRHSPTPQQSNR.[T]	E9PUK6	Serine/arginine repetitive matrix protein 1 OS=Mus musculus GN=Srrm1 PE=1 SV=1		0.837365	0.849391	0.252883	0.26249	0.11	-0.04	0.23	-0.16	1.079	0.974	1.175	0.894	44.8	41.5	43.7	48.8	16.13	7.37	14.89	22.69	High	High	High	High	High	High	High	High	High	High	High	High	High	High	High	High	E9PUK6 [409-420]	E9PUK6 1xPhospho [S412(99)]	1.9	100	1	49.1	53.4	40.9
FALSE	High	[R].ASSLNFLNKSVEEPVQPGGTGLSDSR.[T]	D3YXZ3	Kinesin light chain 2 OS=Mus musculus GN=Klc2 PE=1 SV=1		0.985604	0.286576	0.976949	0.2629	0.14	-0.55	0.1	-0.51	1.099	0.682	1.07	0.701	20.1	18.3	13.7	19.6	12.76	25.73	30.12	20.91	High	High	High	High	High	High	High	High	High	High	High	High	High	High	High	High	D3YXZ3 [575-600]	D3YXZ3 2xPhospho [S584(100); S/T]	5.72	100	1	20.2	16.3	22.4
FALSE	High	[K].SGSSPPSPR.[E]	Q8BHS8	Syntabulin OS=Mus musculus GN=Sybu PE=1 SV=1		0.960596	0.995605	0.178772	0.263138	0.18	-0.21	0.57	-0.61	1.131	0.863	1.486	0.657	12.8	11.3	11	16.8	28.17	21.76	33.45	13.62	High	High	High	High	High	High	High	High	High	High	High	High	High	High	High	High	Q8BHS8 [196-204]	Q8BHS8 2xPhospho [S199(99.5); S202(100)]	1.51	100	1	12.3	16.7	13.2
FALSE	High	[R].SDISERPSVDDVESETGSTGALETR.[S]	Q80X80	C2 domain-containing protein 2-like OS=Mus musculus GN=C2cd2l PE=1 SV=3		0.484886	0.997796	0.91436	0.265013	0.17	-0.05	-0.1	0.23	1.127	0.968	0.93	1.173	66.3	58.8	64.1	54.7	10.72	14.34	9.67	7.92	High	High	High	High	High	High	High	High	High	High	High	High	High	High	High	High	Q80X80 [606-630]	Q80X80 2xPhospho [S613(100); S623(100)]	7.01	100	1	68.7	68.5	64.1
FALSE	High	[R].APQTSSPPPVR.[R]	E9PUK6	Serine/arginine repetitive matrix protein 1 OS=Mus musculus GN=Srrm1 PE=1 SV=1		0.662841	0.752718	0.210749	0.265998	0.14	-0.05	0.28	-0.19	1.102	0.964	1.215	0.874	15.5	14.1	15	17.1	6	13.09	21.56	13.04	High	High	High	High	High	High	High	High	High	High	High	High	High	High	High	High	E9PUK6 [709-719]	E9PUK6 1xPhospho [S714(99.6)]	2.28	100	1	16.2	15.6	15.4
FALSE	High	[K].NWPSDEMPDFPKSDDSKSSSPEPVTHLK.[W]	Q5FWK3	Rho GTPase-activating protein 1 OS=Mus musculus GN=Arhgap1 PE=1 SV=1		0.917141	0.768522	0.161961	0.266259	-0.18	0.25	0.43	-0.35	0.883	1.19	1.344	0.782	11.3	12.8	13.5	17.3	28.58	17.85	6.15	16.31	High	High	High	High	High	High	High	High	High	High	High	High	High	High	High	High	Q5FWK3 [32-59]	Q5FWK3 3xPhospho [S49(98.8); S50(98.8); S51(100)]	3.84	100	1	12.7	17.1	10.1
FALSE	High	[K].GGEFDEFVNDDTDDDLPVSK.[K]	Q62018	RNA polymerase-associated protein CTR9 homolog OS=Mus musculus GN=Ctr9 PE=1 SV=2		0.904229	0.469902	0.9949	0.266341	-0.23	-0.29	-0.09	-0.43	0.851	0.819	0.939	0.742	7.1	8.3	5.8	7.8	11.64	9.87	35.4	14.08	High	High	High	High	High	High	High	High	High	High	High	High	High	High	High	High	Q62018 [914-933]	Q62018 1xPhospho [T925(100)]	1.8	100	1	6.8	7.2	8.7
FALSE	High	[K].EMQPTHPIR.[L]	P68254; Q9CQV8; P63101	14-3-3 protein theta OS=Mus musculus GN=Ywhaq PE=1 SV=1 14-3-3 protein beta/alpha OS=Mus musculus GN=Ywhab PE=1 SV=3 14-3-3 protein zeta/delta OS=Mus musculus GN=Ywhaz PE=1 SV=1	Shared	0.465684	0.999713	0.986233	0.266735	-0.4	-0.04	0.01	-0.45	0.76	0.972	1.009	0.732	9.2	12.1	8.9	12.2	21.22	15.92	41.52	24.06	High	High	High	High	High	High	High	High	High	High	High	High	High	High	High	High	P68254 [159-167]; Q9CQV8 [161-169]; P63101 [159-167]		2.94	100	3	10.6	9.2	9.2
FALSE	High	[K].GGTPAGSTR.[G]	E9PWE8	Dihydropyrimidinase-related protein 3 OS=Mus musculus GN=Dpysl3 PE=1 SV=1		0.922354	0.435798	0.75699	0.268296	0.25	-0.7	0.21	-0.65	1.191	0.617	1.153	0.637	96.5	81	59.5	93.4	33.94	31.11	40.81	34.14	High	High	High	High	High	High	High	High	High	High	High	High	High	High	High	High	E9PWE8 [625-633]	E9PWE8 1xPhospho [T627(100)]	2.72	100	1	105.6	128.5	88.2
FALSE	High	[K].VGSLTPPSSPK.[T]	Q3UHJ0	AP2-associated protein kinase 1 OS=Mus musculus GN=Aak1 PE=1 SV=2		0.99982	0.527114	0.927194	0.269374	0.05	-0.15	0.03	-0.14	1.033	0.899	1.024	0.906	81.7	79.1	73.4	81	9.23	10.2	7.63	9.83	High	High	High	High	High	High	High	High	High	High	High	High	High	High	High	High	Q3UHJ0 [614-624]	Q3UHJ0 2xPhospho [T618(100); S622(100)]	3.01	100	1	82.6	86.8	69.5
FALSE	High	[K].AQPGSPQALGGPHGPATAK.[V]	Q6P9K8	Caskin-1 OS=Mus musculus GN=Caskin1 PE=1 SV=2		0.962832	0.288845	0.951347	0.269705	0.03	-0.21	0.07	-0.25	1.024	0.865	1.05	0.843	35.6	34.7	30.7	36.5	17.78	15.19	4.81	10.69	High	High	High	High	High	High	High	High	High	High	High	High	High	High	High	High	Q6P9K8 [787-805]	Q6P9K8 1xPhospho [S791(100)]	3.74	100	1	30.6	31.2	40.6
FALSE	High	[K].QGSPTKDIEIQFQR.[L]	Q6ZPF3	T-lymphoma invasion and metastasis-inducing protein 2 OS=Mus musculus GN=Tiam2 PE=1 SV=2		0.341468	0.996354	0.999956	0.272077	0.12	0.08	-0.08	0.29	1.088	1.06	0.943	1.223	36.3	33.3	38.5	31.5	13.75	13.64	6.6	11.05	High	High	High	High	High	High	High	High	High	High	High	High	High	High	High	High	Q6ZPF3 [1602-1615]	Q6ZPF3 1xPhospho [S1604(100)]	1.1	100	1	38.5	34.3	33.6
FALSE	High	[R].SFFTDGSLDSWGTSEDADAPSK.[R]	F8VQ11	Rho GTPase-activating protein 23 OS=Mus musculus GN=Arhgap23 PE=1 SV=1		0.962976	0.741053	0.974122	0.272373	-0.03	-0.08	0.16	-0.27	0.976	0.946	1.117	0.827	20.3	20.8	19.2	23.2	13.09	15.4	7.67	13.12	High	High	High	High	High	High	High	High	High	High	High	High	High	High	High	High	F8VQ11 [443-464]	F8VQ11 2xPhospho [S449(98.3); T/S]	2.58	100	1	18.6	22.2	18.1
FALSE	High	[K].QNSLEYMDQNDDRLK.[S]	Q640R3	Hepatocyte cell adhesion molecule OS=Mus musculus GN=Hepacam PE=1 SV=2		0.735722	0.846287	0.999878	0.273205	-0.19	-0.11	0.13	-0.43	0.877	0.924	1.092	0.742	18	20.5	16.6	22.4	29.62	13.24	26.14	18.61	High	High	High	High	High	High	High	High	High	High	High	High	High	High	High	High	Q640R3 [278-292]	Q640R3 1xPhospho [S280(99.5)]	1.62	100	1	18.7	26.5	17.3
FALSE	High	[R].ATQQSLGEQSNPRR.[S]	B1AZP2	Disks large-associated protein 4 OS=Mus musculus GN=Dlgap4 PE=1 SV=1		0.989365	0.501858	0.998227	0.273594	0.29	0.41	-0.06	0.75	1.221	1.324	0.958	1.687	15.6	12.8	20.7	12.3	47.17	23.4	29.69	14.75	High	High	High	High	High	High	High	High	High	High	High	High	High	High	High	High	B1AZP2 [401-414]	B1AZP2 2xPhospho [S405(99.4); S410(100)]	2.06	100	1	23.4	17.8	13.8
FALSE	High	[K].SSGSLSPGLETEDPLEAR.[E]	P58871	182 kDa tankyrase-1-binding protein OS=Mus musculus GN=Tnks1bp1 PE=1 SV=2		0.997422	0.347503	0.999998	0.274278	0.05	-0.31	0.09	-0.35	1.035	0.804	1.061	0.784	21.1	20.4	17	21.7	17	6.21	4.36	18	High	High	High	High	High	High	High	High	High	High	High	High	High	High	High	High	P58871 [1370-1387]	P58871 2xPhospho [S1373(98.9); S1375(100)]	4.67	100	1	15.5	22.5	19.8
FALSE	High	[R].KNTFTAWSEEDSDYEIDDRDVNK.[I]	Z4YJT3	La-related protein 1 OS=Mus musculus GN=Larp1 PE=1 SV=1		0.214609	0.204468	0.287128	0.274404	-0.31	0.46	-0.37	0.52	0.806	1.378	0.774	1.435	19.1	23.7	26.3	18.4	28.01	8.46	15.38	24.5	High	High	High	High	High	High	High	High	High	High	High	High	High	High	High	High	Z4YJT3 [597-619]	Z4YJT3 2xPhospho [S604(100); S608(100)]	2.65	100	1	11.5	17	22.7
FALSE	High	[R].NSWDSPAFSNDVIR.[K]	E9PUA3	IQ motif and SEC7 domain-containing protein 1 OS=Mus musculus GN=Iqsec1 PE=1 SV=1		0.962572	0.896895	0.881642	0.275692	0.14	0.11	-0.11	0.37	1.106	1.081	0.927	1.288	42	38	45.4	35.2	12.63	22.86	10.51	17.12	High	High	High	High	High	High	High	High	High	High	High	High	High	High	High	High	E9PUA3 [495-508]	E9PUA3 1xPhospho [S499(100)]	3.73	100	1	43.5	44.3	40.5
FALSE	High	[K].SKEEQELHDIHSTRSK.[E]	P35802	Neuronal membrane glycoprotein M6-a OS=Mus musculus GN=Gpm6a PE=1 SV=1		0.270745	0.468462	0.461309	0.275878	0.22	0.31	0.26	0.27	1.168	1.237	1.196	1.208	100.1	85.7	123.8	102.5	26.49	12.55	13.97	11.38	High	High	High	High	High	High	High	High	High	High	High	High	High	High	High	High	P35802 [256-271]		4.18	100	1	151.8	86	102.7
FALSE	High	[R].KGSSAVGSDSD.[-]	Q7TPD0	Integrator complex subunit 3 OS=Mus musculus GN=Ints3 PE=1 SV=2		0.92026	0.847255	0.96569	0.27593	-0.27	-0.09	0.1	-0.47	0.826	0.941	1.074	0.724	13.8	16.8	13	18	21.27	27.47	16.35	13.12	High	High	High	High	High	High	High	High	High	High	High	High	High	High	High	High	Q7TPD0 [1031-1041]	Q7TPD0 2xPhospho [S1038(100); S1040(100)]	2.37	100	1	12.1	13.9	19.3
FALSE	High	[K].DNINVK.[Q]	P63011; P62823	Ras-related protein Rab-3A OS=Mus musculus GN=Rab3a PE=1 SV=1 Ras-related protein Rab-3C OS=Mus musculus GN=Rab3c PE=1 SV=1	Shared	0.969315	0.693578	0.983798	0.276208	-0.1	-0.18	0.03	-0.31	0.933	0.881	1.021	0.805	23.1	24.8	20.4	25.3	17.69	13.95	23.49	12.47	High	High	High	High	High	High	High	High	High	High	High	High	High	High	High	High	P63011 [168-173]; P62823 [176-181]		1.45	100	2	22.1	24.3	29.3
FALSE	High	[R].ADAHSMELEEK.[T]	P16014	Secretogranin-1 OS=Mus musculus GN=Chgb PE=1 SV=2		0.521064	0.999592	0.977299	0.27628	-0.23	-0.09	0.14	-0.45	0.855	0.939	1.1	0.73	21.1	24.6	19.8	27.1	17.93	22.34	19.78	23.47	High	High	High	High	High	High	High	High	High	High	High	High	High	High	High	High	P16014 [216-226]	P16014 1xPhospho [S220(100)]	2.74	100	1	24.8	23.3	19.1
FALSE	High	[R].RPDPDSDEDEDYER.[E]	Q8JZX4	Splicing factor 45 OS=Mus musculus GN=Rbm17 PE=1 SV=1		0.921924	0.289292	0.910837	0.276459	0.1	-0.44	0.09	-0.43	1.068	0.737	1.061	0.742	16.4	15.4	12.1	16.3	13.38	15.35	22.85	17.07	High	High	High	High	High	High	High	High	High	High	High	High	High	High	High	High	Q8JZX4 [150-163]	Q8JZX4 1xPhospho [S155(100)]	2.29	100	1	17.5	15.5	18.9
FALSE	High	[K].AVDSLVPIGR.[G]	Q03265	ATP synthase subunit alpha, mitochondrial OS=Mus musculus GN=Atp5a1 PE=1 SV=1		0.965897	0.654462	0.641677	0.276717	0.12	-0.16	0.25	-0.29	1.087	0.892	1.188	0.816	19.2	17.7	17.1	21	3.04	13.18	4.4	20.55	High	High	High	High	High	High	High	High	High	High	High	High	High	High	High	High	Q03265 [195-204]		1.23	100	1	18.5	19.7	18.8
FALSE	High	[R].RPSVNSDLK.[Y]	P63032	GTP-binding protein Rhes OS=Mus musculus GN=Rasd2 PE=2 SV=1		0.998302	0.51261	0.988001	0.276933	-0.04	-0.24	0.09	-0.36	0.975	0.849	1.062	0.779	24.8	25.4	21	27	17.11	16.82	31.48	7	High	High	High	High	High	High	High	High	High	High	High	High	High	High	High	High	P63032 [237-245]	P63032 1xPhospho [S239(100)]	2.32	100	1	23.6	26	20.4
FALSE	High	[R].ETAPTSTYSSPAR.[S]	Q8K0U4	Heat shock 70 kDa protein 12A OS=Mus musculus GN=Hspa12a PE=1 SV=1		0.914468	0.628248	0.560686	0.277107	0.15	-0.34	0.16	-0.35	1.109	0.79	1.118	0.783	34.2	30.9	27	34.5	13.63	14.7	15.03	9.8	High	High	High	High	High	High	High	High	High	High	High	High	High	High	High	High	Q8K0U4 [15-27]	Q8K0U4 1xPhospho [S24(99.7)]	4.77	100	1	35.2	35	25.9
FALSE	High	[R].NSDENSSIGR.[A]	E9Q3Y4	Lipopolysaccharide-responsive and beige-like anchor protein OS=Mus musculus GN=Lrba PE=1 SV=1		0.988929	0.999631	0.370342	0.27755	0.02	0.04	-0.68	0.75	1.017	1.031	0.625	1.678	9.4	9.3	9.7	5.8	23.03	31.48	32.98	47.02	High	High	High	High	High	High	High	High	High	High	High	High	High	High	High	High	E9Q3Y4 [988-997]	E9Q3Y4 1xPhospho [S993(99.6)]	1.44	100	1	8.4	13	10.6
FALSE	High	[K].EGDTEEEAGPQAAEPSTPSGPESGPTPASAEQNE.[-]	P28667	MARCKS-related protein OS=Mus musculus GN=Marcksl1 PE=1 SV=2		0.994113	0.827769	0.581263	0.278221	0.03	0.03	-0.21	0.27	1.019	1.021	0.862	1.208	56.1	55.1	57.3	47.4	15.32	12.09	8.1	13.28	High	High	High	High	High	High	High	High	High	High	High	High	High	High	High	High	P28667 [167-200]		9.14	100	1	59.7	52.8	59.7
FALSE	High	[R].FESPDSQASAEQPEM.[-]	P40336	Vacuolar protein sorting-associated protein 26A OS=Mus musculus GN=Vps26a PE=1 SV=1		0.996484	0.999994	0.212859	0.279075	-0.13	-0.02	-0.4	0.26	0.912	0.99	0.756	1.194	18.6	20.4	18.4	15.4	21.64	5.18	16.56	21.38	High	High	High	High	High	High	High	High	High	High	High	High	High	High	High	High	P40336 [313-327]	P40336 1xPhospho [S315(100)]	2.78	100	1	18.1	19.1	16.4
FALSE	High	[R].YSTGSQSR.[I]	D3Z593	Adhesion G protein-coupled receptor L3 OS=Mus musculus GN=Adgrl3 PE=1 SV=1		0.992232	0.998761	0.147123	0.279357	-0.21	-0.05	-0.7	0.44	0.862	0.965	0.614	1.354	68.5	79.5	66	48.8	22.25	36.01	9.05	33.11	High	High	High	High	High	High	High	High	High	High	High	High	High	High	High	High	D3Z593 [1157-1164]		1.96	100	1	81	57.9	82.4
FALSE	High	[K].SSAIQMGTPELEK.[E]	H3BIV5	A-kinase anchor protein 5 OS=Mus musculus GN=Akap5 PE=1 SV=1		0.999254	0.788094	0.8351	0.279497	0.02	-0.24	0.17	-0.39	1.013	0.848	1.122	0.766	15.3	15.1	12.9	16.9	24.6	13.72	17.23	33.45	High	High	High	High	High	High	High	High	High	High	High	High	High	High	High	High	H3BIV5 [220-232]	H3BIV5 1xPhospho [T227(100)]	2.92	100	1	13.1	11.6	17.8
FALSE	High	[K].YEDNKGSNDSIFDSEAKDLER.[E]	Q8K4R4	Cytoplasmic phosphatidylinositol transfer protein 1 OS=Mus musculus GN=Pitpnc1 PE=1 SV=1		0.999405	0.770521	0.726304	0.279602	-0.01	0.28	-0.32	0.59	0.992	1.216	0.8	1.506	27.2	27.4	33.1	22	27.74	36.57	18.01	17.39	High	High	High	High	High	High	High	High	High	High	High	High	High	High	High	High	Q8K4R4 [113-133]	Q8K4R4 2xPhospho [S119(100); S122(100)]	2.22	100	1	34.1	27.8	26.6
FALSE	High	[R].TKSVGEDEK.[L]	A0A0A0MQD5	SH3 and multiple ankyrin repeat domains protein 3 OS=Mus musculus GN=Shank3 PE=1 SV=1		0.897192	0.705775	0.462695	0.279651	0.05	-0.14	0.3	-0.39	1.034	0.904	1.229	0.761	82.8	80.1	74.9	98.5	10.18	22.18	29.49	16.15	High	High	High	High	High	High	High	High	High	High	High	High	High	High	High	High	A0A0A0MQD5 [854-862]	A0A0A0MQD5 1xPhospho [S856(100)]	1.53	100	1	79.5	98.7	81
FALSE	High	[K].YFDSGDYNMAK.[A]	E9Q827	cAMP-regulated phosphoprotein 19 OS=Mus musculus GN=Arpp19 PE=1 SV=1		0.289454	0.974223	0.970168	0.280589	0.56	-0.17	-0.13	0.51	1.475	0.887	0.917	1.428	42.7	28.9	37.8	26.5	15.65	13.09	37.81	14.23	High	High	High	High	High	High	High	High	High	High	High	High	High	High	High	High	E9Q827 [92-102]	E9Q827 1xPhospho [S95(100)]	3.74	100	1	41.9	31.5	43.5
FALSE	High	[K].QLEDGR.[T]	E9Q5F6	Polyubiquitin-C (Fragment) OS=Mus musculus GN=Ubc PE=4 SV=1		0.964294	0.778539	0.963608	0.280773	-0.15	-0.29	0.05	-0.48	0.903	0.82	1.034	0.716	15.2	16.8	12.4	17.4	11.79	19.17	23.46	24.97	High	High	High	High	High	High	High	High	High	High	High	High	High	High	High	High	E9Q5F6 [49-54]; [125-130]		1.59	100	1	13.9	18.2	15.4
FALSE	High	[K].MLGEDSDEEEEANTTEGK.[S]	E9Q1Q0	Protein Slc4a1ap OS=Mus musculus GN=Slc4a1ap PE=1 SV=1		0.620189	0.92797	0.999934	0.281002	-0.27	-0.04	0.02	-0.33	0.83	0.972	1.011	0.797	21.7	26.2	21.1	26.5	14.18	9.58	21.26	13.29	High	High	High	High	High	High	High	High	High	High	High	High	High	High	High	High	E9Q1Q0 [253-270]	E9Q1Q0 1xPhospho [S258(100)]	4.23	100	1	21.7	20	21.8
FALSE	High	[R].QESSEQETPTRGELVK.[G]	E9PX29	Protein Sptbn4 OS=Mus musculus GN=Sptbn4 PE=1 SV=1		0.679927	0.995439	0.754804	0.28114	0.16	-0.06	-0.28	0.38	1.116	0.956	0.821	1.299	16.4	14.7	15.7	12.1	21.95	19.32	24.14	16.67	High	High	High	High	High	High	High	High	High	High	High	High	High	High	High	High	E9PX29 [2299-2314]	E9PX29 2xPhospho [S2301(100); S2302(100)]	1.82	100	1	17.8	15.1	12.9
FALSE	High	[R].QNSATERADSIEIYIPEAQTR.[L]	Q8BJ42	Disks large-associated protein 2 OS=Mus musculus GN=Dlgap2 PE=1 SV=2		0.796634	0.298734	0.773907	0.281145	0.08	-0.21	0.13	-0.26	1.055	0.866	1.093	0.836	50.8	48.2	44	52.6	7.92	14.29	9.24	12.87	High	High	High	High	High	High	High	High	High	High	High	High	High	High	High	High	Q8BJ42 [1038-1058]	Q8BJ42 1xPhospho [S1047(100)]	2.68	100	1	58.2	51	48.8
FALSE	High	[R].WDLPDSDWDNDSSSAR.[L]	Q68FG2	Protein Sptbn2 OS=Mus musculus GN=Sptbn2 PE=1 SV=1		0.996957	0.993727	0.304124	0.281339	-0.02	0.01	-0.21	0.2	0.988	1.005	0.863	1.15	8.6	8.7	8.6	7.5	15.06	13.93	6.74	19.95	High	High	High	High	High	High	High	High	High	High	High	High	High	High	High	High	Q68FG2 [26-41]	Q68FG2 1xPhospho [S31(100)]	2.85	100	1	6.9	10.1	8.7
FALSE	High	[R].EMDMSPEEVAPSPR.[A]	Q8CH72	E3 ubiquitin-protein ligase TRIM32 OS=Mus musculus GN=Trim32 PE=1 SV=2		0.654089	0.978491	0.987334	0.281349	-0.24	-0.17	0.14	-0.55	0.848	0.89	1.102	0.685	15.2	17.9	13.5	19.7	16.09	21.77	30.89	20.05	High	High	High	High	High	High	High	High	High	High	High	High	High	High	High	High	Q8CH72 [326-339]	Q8CH72 1xPhospho [S330(100)]	4.36	100	1	14.8	15.6	13.5
FALSE	High	[R].DEADSKTASPWK.[S]	E9Q447	Spectrin alpha chain, non-erythrocytic 1 OS=Mus musculus GN=Sptan1 PE=1 SV=1		0.814721	0.857129	0.320429	0.283055	0.29	-0.19	-0.51	0.61	1.223	0.877	0.701	1.53	56.7	46.4	49.7	32.5	22.11	27.04	30.15	7.87	High	High	High	High	High	High	High	High	High	High	High	High	High	High	High	High	E9Q447 [1162-1173]	E9Q447 2xPhospho [S1166(100); S1170(100)]	3.54	100	1	63.7	55.7	57.7
FALSE	High	[K].APAPAAPAAAEPQAEAPAAAASSEQSVAVKE.[-]	Q91XV3	Brain acid soluble protein 1 OS=Mus musculus GN=Basp1 PE=1 SV=3		0.365052	0.95512	0.89639	0.283559	0.35	0.03	-0.16	0.54	1.276	1.018	0.893	1.454	23.1	18.1	23.5	16.2	13.31	27.71	23.02	9.13	High	High	High	High	High	High	High	High	High	High	High	High	High	High	High	High	Q91XV3 [196-226]	Q91XV3 1xPhospho [S218(99.4)]	6.57	100	1	27.2	20.4	24.8
FALSE	High	[K].AIEQSIEQEEGLNR.[S]	P61264	Syntaxin-1B OS=Mus musculus GN=Stx1b PE=1 SV=1		0.578674	0.999789	0.908545	0.284701	-0.19	0.03	0.09	-0.25	0.874	1.022	1.061	0.842	34.6	39.6	35.4	42	15.48	16.56	11.11	6.22	High	High	High	High	High	High	High	High	High	High	High	High	High	High	High	High	P61264 [94-107]		4.53	100	1	28.2	33.2	36
FALSE	High	[K].LGDSLQDLYR.[A]	Q80YA9	Connector enhancer of kinase suppressor of ras 2 OS=Mus musculus GN=Cnksr2 PE=1 SV=1		0.656428	0.972592	0.674241	0.286626	0.17	0	-0.07	0.23	1.122	0.997	0.954	1.173	149	132.7	148.5	126.6	9.6	13.7	12.77	3.76	High	High	High	High	High	High	High	High	High	High	High	High	High	High	High	High	Q80YA9 [903-912]	Q80YA9 1xPhospho [S906(100)]	3.6	100	1	170.3	150.5	147.5
FALSE	High	[R].AESADSLGSEDRDLLYSIDAYR.[S]	Q8K298	Anillin OS=Mus musculus GN=Anln PE=1 SV=2		0.98185	1	0.465028	0.287806	0.1	0.05	-0.72	0.88	1.075	1.036	0.605	1.841	107.1	99.6	111	60.3	24.66	47.2	35.77	14.65	High	High	High	High	High	High	High	High	High	High	High	High	High	High	High	High	Q8K298 [651-672]	Q8K298 2xPhospho [S653(100); S656(100)]	4.42	100	1	131.9	100.2	114.5
FALSE	High	[R].VERGSPSR.[S]	Q6NS60	F-box only protein 41 OS=Mus musculus GN=Fbxo41 PE=1 SV=3		0.872369	0.923534	0.346391	0.287981	-0.17	0.09	0.03	-0.11	0.889	1.065	1.023	0.925	48.9	55	52.1	56.3	4.57	12.4	6.26	14.87	High	High	High	High	High	High	High	High	High	High	High	High	High	High	High	High	Q6NS60 [532-539]		1.68	100	1	47.2	50.7	51.1
FALSE	High	[K].ATSQSSIR.[Q]	Q8VBT0	Thioredoxin-related transmembrane protein 1 OS=Mus musculus GN=Tmx1 PE=1 SV=1		0.935508	0.999994	0.541477	0.28818	0.08	0.25	-0.37	0.7	1.06	1.186	0.776	1.621	16.4	15.5	19.5	12	39.77	21.59	29.61	29.04	High	High	High	High	High	High	High	High	High	High	High	High	High	Not Found	High	High	Q8VBT0 [258-265]		1.71	94	1	26.8	18.4	14.6
FALSE	High	[K].QPGIQSPSR.[E]	P14873	Microtubule-associated protein 1B OS=Mus musculus GN=Map1b PE=1 SV=2		0.751933	0.790547	0.999941	0.28831	-0.13	-0.22	0.09	-0.44	0.915	0.857	1.065	0.736	25.3	27.7	21.7	29.5	6.68	11.09	22.02	20.12	High	High	High	High	High	High	High	High	High	High	High	High	High	High	High	High	P14873 [1068-1076]	P14873 1xPhospho [S1073(100)]	1.51	100	1	26	24.6	22.6
FALSE	High	[R].SDVAVPLTLHGYSDPGSEESGADCSVSR.[G]	Q14BB9	MAP6 domain-containing protein 1 OS=Mus musculus GN=Map6d1 PE=1 SV=1		0.322062	0.878607	0.0536522	0.288677	0.5	-0.06	0.83	-0.4	1.41	0.957	1.775	0.76	9	6.4	8.7	11.4	15.7	33.34	17	26.31	High	High	High	High	High	High	High	High	High	High	High	High	High	High	High	High	Q14BB9 [22-49]	Q14BB9 2xPhospho [S34(100); S38(100)]	2.81	100	1	9.7	8.5	7.7
FALSE	High	[K].EFGGVGAPPSPGVAR.[R]	F7BQW7	Synaptojanin-1 (Fragment) OS=Mus musculus GN=Synj1 PE=1 SV=1		0.665187	0.943012	0.115736	0.288825	-0.45	0.27	-0.61	0.43	0.732	1.207	0.657	1.344	8.5	11.7	10.3	7.7	36.46	6.12	16.58	23.12	High	High	High	High	High	High	High	High	High	High	High	High	High	High	High	High	F7BQW7 [1153-1167]	F7BQW7 1xPhospho [S1162(100)]	2.84	100	1	8.6	8.5	7.9
FALSE	High	[R].ECSLSPK.[S]	Q9WV69	Dematin OS=Mus musculus GN=Dmtn PE=1 SV=1		0.997073	0.929643	0.483114	0.288918	0.13	-0.14	0.16	-0.16	1.095	0.908	1.114	0.892	47.9	43.8	43.5	48.8	12.94	11.84	10.48	14.63	High	High	High	High	High	High	High	High	High	High	High	High	High	High	High	High	Q9WV69 [83-89]	Q9WV69 1xPhospho [S87(100)]	2.68	100	1	36.5	48.2	47.7
FALSE	High	[R].TAKDSDDDDDVTVTVDR.[D]	O35526	Syntaxin-1A OS=Mus musculus GN=Stx1a PE=1 SV=3		0.329449	0.999739	1	0.290223	-0.17	0.05	0.04	-0.16	0.887	1.037	1.026	0.895	262.2	295.7	271.8	303.5	14.64	7.73	10.62	5.26	High	High	High	High	High	High	High	High	High	High	High	High	High	High	High	High	O35526 [10-26]	O35526 1xPhospho [S14(100)]	6.17	100	1	285.9	314.7	240.4
FALSE	High	[R].NDSIVTPSPPQAR.[V]	Q6PCP5	Mitochondrial fission factor OS=Mus musculus GN=Mff PE=1 SV=1		0.977996	0.999924	0.513721	0.290379	-0.1	-0.01	0.37	-0.47	0.933	0.994	1.288	0.72	43.7	46.9	43.5	60.4	27.24	32.61	15.37	3.66	High	High	High	High	High	High	High	High	High	High	High	High	High	High	High	High	Q6PCP5 [144-156]	Q6PCP5 2xPhospho [T149(100); S151(100)]	5.58	100	1	33	43.9	43.6
FALSE	High	[R].SRTASLTSAASIDGSR.[S]	Q9QYG0	Protein NDRG2 OS=Mus musculus GN=Ndrg2 PE=1 SV=1		0.977181	0.959705	0.255894	0.290606	0.03	-0.09	-0.43	0.36	1.02	0.939	0.744	1.287	153.4	150.4	144.1	112	15.35	28.31	14.43	1.72	High	High	High	High	High	High	High	High	High	High	High	High	High	High	High	High	Q9QYG0 [328-343]	Q9QYG0 3xPhospho [T330(100); S332(100); S338(100)]	4.48	100	1	168.4	139.8	180
FALSE	High	[K].QASEDSNDLTPTLPETPVPLPR.[K]	H3BJY2	Arf-GAP with SH3 domain, ANK repeat and PH domain-containing protein 1 OS=Mus musculus GN=Asap1 PE=1 SV=1		0.613701	1	0.921541	0.290793	-0.13	-0.11	0.05	-0.29	0.915	0.927	1.034	0.819	23.2	25.4	21.5	26.2	8.21	4.62	15.11	14.11	High	High	High	High	High	High	High	High	High	High	High	High	High	High	High	High	H3BJY2 [1054-1075]	H3BJY2 1xPhospho [S1056(100)]	5.59	100	1	24.6	23.3	20.2
FALSE	High	[R].YLPEEVAHSDISETSSR.[A]	P35436	Glutamate receptor ionotropic, NMDA 2A OS=Mus musculus GN=Grin2a PE=1 SV=2		0.993357	0.938208	0.436329	0.290865	0.02	-0.02	-0.21	0.21	1.015	0.985	0.865	1.156	40.8	40.2	40.2	34.8	14.32	7.23	10.06	7.02	High	High	High	High	High	High	High	High	High	High	High	High	High	High	High	High	P35436 [1051-1067]	P35436 2xPhospho [S1059(100); S/T/Y]	2.98	100	1	42.1	31.4	39.6
FALSE	High	[R].RDRSPIRGSPR.[R]	B7ZC24	Nuclear receptor coactivator 5 OS=Mus musculus GN=Ncoa5 PE=1 SV=1		0.996839	0.268368	0.998818	0.291027	0.03	-0.19	0.01	-0.16	1.024	0.879	1.004	0.896	55.3	54	48.6	54.2	5.86	17.9	28.88	3.57	High	High	High	High	High	High	High	High	High	High	High	High	High	High	High	High	B7ZC24 [26-36]	B7ZC24 2xPhospho [S29(100); S34(100)]	2.22	100	1	51.1	58.5	56.7
FALSE	High	[R].ERSDSGGSSSEPFER.[H]	G3UX48	Protein PRRC2A OS=Mus musculus GN=Prrc2a PE=1 SV=1		0.120561	0.80097	0.987131	0.291656	-0.31	0.12	0.05	-0.24	0.805	1.088	1.033	0.848	13.8	17.1	15	17.7	10.58	20.56	10.45	15.23	High	High	High	High	High	High	High	High	High	High	High	High	High	High	High	High	G3UX48 [702-716]	G3UX48 2xPhospho [S704(100); S706(100)]	2.33	100	1	14	12	15.5
FALSE	High	[K].AEDGAAPSPSSETPK.[K]	P26645	Myristoylated alanine-rich C-kinase substrate OS=Mus musculus GN=Marcks PE=1 SV=2		0.883961	0.846149	0.328792	0.291791	0.09	-0.09	0.09	-0.09	1.066	0.939	1.067	0.938	252.5	236.8	237.1	252.7	6.07	7.88	4.11	12.28	High	High	High	High	High	High	High	High	High	High	High	High	High	High	High	High	P26645 [131-145]	P26645 1xPhospho [T143(100)]	6.49	100	1	254.5	250.6	226.9
FALSE	High	[K].FPEEGISPQNPDSPGLSDLNCGHLR.[F]	D3Z0D9	DnaJ (Hsp40) homolog, subfamily C, member 12, isoform CRA_a (Fragment) OS=Mus musculus GN=Dnajc12 PE=1 SV=1		0.453621	0.234226	0.53867	0.291866	0.17	-0.29	0.25	-0.37	1.125	0.817	1.19	0.772	27.5	24.4	22.4	29.1	19.95	10.59	15.88	8.35	High	High	High	High	High	High	High	High	High	High	High	High	High	High	High	High	D3Z0D9 [72-96]	D3Z0D9 2xPhospho [S78(100); S84(100)]	5.09	100	1	24	24.6	30.6
FALSE	High	[K].KETESDQDDEAEK.[A]	A0A087WNU5	Ankyrin-3 (Fragment) OS=Mus musculus GN=Ank3 PE=1 SV=1		0.779624	0.382085	0.875218	0.292532	-0.21	-0.76	-0.36	-0.61	0.862	0.591	0.78	0.653	16	18.5	9.4	14.4	26.47	20.08	25.65	37.04	High	High	High	High	High	High	High	High	High	High	High	High	High	High	High	High	A0A087WNU5 [160-172]		1.48	100	1	16.6	16.3	15.7
FALSE	High	[K].SSPKEEVASEPEEAASPTTPK.[K]	A2APD7	Nucleolar protein 56 (Fragment) OS=Mus musculus GN=Nop56 PE=1 SV=1		0.814883	0.693227	0.39493	0.293026	-0.09	0.13	-0.16	0.2	0.938	1.095	0.893	1.15	24.9	26.5	27.2	23.7	12.43	9.98	4.93	16.38	High	High	High	High	High	High	High	High	High	High	High	High	High	High	High	High	A2APD7 [244-264]	A2APD7 3xPhospho [S245(99.4); S252(100); S259(100)]	5.55	100	1	22.7	22.2	28.4
FALSE	High	[K].GGSLGCQTETDPDTQSPPYMGATSPPKDK.[K]	Q9QYX7	Protein piccolo OS=Mus musculus GN=Pclo PE=1 SV=4		0.532797	0.910863	0.0955058	0.293125	-0.22	0.18	-0.4	0.35	0.857	1.132	0.76	1.277	21.8	25.5	24.7	19.4	6.18	11.58	14.26	18.44	High	High	High	High	High	High	High	High	High	High	High	High	High	High	High	High	Q9QYX7 [3491-3519]	Q9QYX7 2xPhospho [S3506(99.1); S3514(99.1)]	5.26	100	1	21.6	22	20.7
FALSE	High	[R].ARSHSPSSPER.[N]	Q8BTI8	Serine/arginine repetitive matrix protein 2 OS=Mus musculus GN=Srrm2 PE=1 SV=3		0.983169	0.995021	0.600748	0.29342	-0.02	-0.09	0.21	-0.32	0.985	0.942	1.159	0.801	41.3	42	38.9	48.6	13.57	8.91	10.98	23.12	High	High	High	High	High	High	High	High	High	High	High	High	High	High	High	High	Q8BTI8 [1451-1461]	Q8BTI8 3xPhospho [S1453(100); S1455(100); S]	4.19	100	1	41.1	41.6	45.4
FALSE	High	[R].NSATCHSEDSDLEID.[-]	Q9DBX2	Phosducin-like protein OS=Mus musculus GN=Pdcl PE=1 SV=1		0.107397	0.11797	0.270847	0.293591	0.38	-0.38	0.19	-0.19	1.303	0.768	1.144	0.875	28.3	21.7	21.8	24.9	17.31	7.58	9.94	13.69	High	High	High	High	High	High	High	High	High	High	High	High	High	High	High	High	Q9DBX2 [287-301]	Q9DBX2 2xPhospho [S288(75); S/T]	1.42	100	1	23	24.9	32.3
FALSE	High	[R].SPSIDSIQKDPR.[E]	O35927; Q68FH0	Catenin delta-2 OS=Mus musculus GN=Ctnnd2 PE=1 SV=1 Plakophilin-4 OS=Mus musculus GN=Pkp4 PE=1 SV=1	Shared	1	0.999928	0.318742	0.293595	-0.12	0.07	0.26	-0.31	0.922	1.048	1.2	0.805	44.9	48.7	47.1	58.5	18	12.08	6.47	12.19	High	High	High	High	High	High	High	High	High	High	High	High	High	High	High	High	O35927 [529-540]; Q68FH0 [509-520]	O35927 1xPhospho [S531(100)]; Q68FH0 1xPhospho [S511(100)]	1.77	100	2	42.4	46.2	43.6
FALSE	High	[K].LIIVEGCQR.[QL]	A0A0G2JGX4; Q8VDN2; D3YYN7	Sodium/potassium-transporting ATPase subunit alpha OS=Mus musculus GN=Atp1a3 PE=1 SV=1 Sodium/potassium-transporting ATPase subunit alpha-1 OS=Mus musculus GN=Atp1a1 PE=1 SV=1 Sodium/potassium-transporting ATPase subunit alpha OS=Mus musculus GN=Atp1a2 PE=1 SV=1	Shared	0.780308	0.737516	0.999365	0.296158	-0.05	-0.19	-0.03	-0.21	0.966	0.874	0.979	0.862	75.6	78.3	66.1	76.6	14.81	11.98	11.74	4.12	High	High	High	High	High	High	High	High	High	High	High	High	High	High	High	High	A0A0G2JGX4 [702-710]; Q8VDN2 [699-707]; D3YYN7 [696-704]		1.52	100	3	75.7	78.9	75.5
FALSE	High	[R].AQPEECSPSGLQR.[A]	Q9ER47	Potassium voltage-gated channel subfamily H member 7 OS=Mus musculus GN=Kcnh7 PE=1 SV=2		0.119878	0.931754	1	0.296302	-0.37	-0.02	-0.07	-0.32	0.774	0.987	0.956	0.8	17.2	22.3	17	21.3	23.61	7.81	18.7	12.16	High	High	High	High	High	High	High	High	High	High	High	High	High	High	High	High	Q9ER47 [1001-1013]	Q9ER47 1xPhospho [S1007(100)]	2.78	100	1	11	17.1	17.4
FALSE	High	[R].AHSRDSSDSADGR.[A]	Q8BTV2	Cleavage and polyadenylation specificity factor subunit 7 OS=Mus musculus GN=Cpsf7 PE=1 SV=2		0.999922	1	0.322763	0.296304	-0.06	-0.01	0.36	-0.42	0.957	0.996	1.28	0.746	16.2	16.9	16.1	21.6	28.35	37.01	9.36	20.17	High	High	High	High	High	High	High	High	High	High	High	High	High	High	High	High	Q8BTV2 [189-201]	Q8BTV2 3xPhospho [S191(100); S194(99.1); S197(99.1)]	2.69	100	1	18.4	22.2	14.3
FALSE	High	[R].GPVPMRRDSDSEDD.[-]	Q8BVF2	Phosducin-like protein 3 OS=Mus musculus GN=Pdcl3 PE=1 SV=1		0.918375	0.747261	0.476992	0.296483	-0.42	0.4	-0.37	0.36	0.748	1.324	0.772	1.282	16.2	21.6	21.4	16.7	42.7	21.71	16.88	20.92	High	High	High	High	High	High	High	High	High	High	High	High	High	High	High	High	Q8BVF2 [227-240]	Q8BVF2 2xPhospho [S235(100); S237(100)]	0.92	100	1	15	14.9	17.5
FALSE	High	[K].EGDGSATTDAAPATSPK.[A]	P06837	Neuromodulin OS=Mus musculus GN=Gap43 PE=1 SV=1		0.525223	0.701729	0.920098	0.296588	-0.14	-0.18	-0.11	-0.2	0.91	0.884	0.925	0.87	20.3	22.3	17.9	20.6	12.12	19.08	11.04	11.52	High	High	High	High	High	High	High	High	High	High	High	High	High	High	High	High	P06837 [82-98]	P06837 2xPhospho [S86(100); S96(100)]	4.82	100	1	20.1	21	20.5
FALSE	High	[R].SFSEDAVTDSSGSGTLPR.[V]	E9QLA5	Inverted formin-2 OS=Mus musculus GN=Inf2 PE=1 SV=1		0.589496	0.943583	0.681877	0.296808	-0.16	0.02	0.33	-0.48	0.896	1.012	1.26	0.719	35.3	39.4	35.7	49.6	13.53	26.91	25.65	7.6	High	High	High	High	High	High	High	High	High	High	High	High	High	High	High	High	E9QLA5 [1214-1231]	E9QLA5 3xPhospho [T1221(100); S1223(100); S1224(100)]	6.9	100	1	35.7	34.8	30.4
FALSE	High	[R].TASISSSPSEGTPAVGSYGCTPQSLPK.[F]	Z4YJT3	La-related protein 1 OS=Mus musculus GN=Larp1 PE=1 SV=1		0.594899	0.230348	0.699136	0.297952	0.31	-0.27	0.24	-0.2	1.236	0.831	1.18	0.87	12.9	10.5	10.8	12.4	14.99	20.79	29.32	16.54	High	High	High	High	High	High	High	High	High	High	High	High	High	High	High	High	Z4YJT3 [822-848]	Z4YJT3 2xPhospho [S824(99); S827(98.1)]	2.71	100	1	12	11.3	13.9
FALSE	High	[R].SRSSANAPR.[R]	Q80WV7	Serine/arginine repetitive matrix protein 3 OS=Mus musculus GN=Srrm3 PE=2 SV=1		0.9676	0.864121	0.923525	0.298788	-0.03	-0.08	0.18	-0.29	0.982	0.944	1.13	0.821	23.7	24.2	22.4	27.3	15.99	15.88	21.2	13.15	High	High	High	High	High	High	High	High	High	High	High	High	High	High	High	High	Q80WV7 [393-401]	Q80WV7 2xPhospho [S393(99.4); S396(100)]	1.48	100	1	19.1	23.8	28.3
FALSE	High	[R].LSPEEPAPEAPETPETPEAPGGSAV.[-]	B1AVF2	TSC22 domain family protein 3 OS=Mus musculus GN=Tsc22d3 PE=1 SV=1		0.999084	0.841318	0.810838	0.299216	0.04	-0.11	0.15	-0.22	1.025	0.927	1.108	0.857	27.9	27.2	25.9	30.2	23.79	10.76	8.42	10.3	High	High	High	High	High	High	High	High	High	High	High	High	High	High	High	High	B1AVF2 [89-113]	B1AVF2 2xPhospho [T101(100); T104(100)]	4.11	100	1	19.9	26.6	29.3
FALSE	High	[R].ERDAEQSSSPR.[T]	P70255	Nuclear factor 1 C-type OS=Mus musculus GN=Nfic PE=1 SV=1		0.762177	0.993738	0.682853	0.299328	-0.13	0.05	0.15	-0.23	0.915	1.032	1.107	0.854	39.6	43.3	40.9	47.9	9.11	10.33	16.89	7.01	High	High	High	High	High	High	High	High	High	High	High	High	High	High	High	High	P70255 [186-196]	P70255 1xPhospho [S193(99.1)]	2.52	100	1	38.9	37.9	40.3
FALSE	High	[R].GTSQVSSPSQPPEK.[Q]	Q8CJ19	Protein-methionine sulfoxide oxidase MICAL3 OS=Mus musculus GN=Mical3 PE=1 SV=2		0.627298	0.999999	0.916371	0.299689	-0.18	0	0	-0.18	0.885	0.998	1.003	0.881	84.8	95.8	84.6	96	5.1	16.31	5.62	19.9	High	High	High	High	High	High	High	High	High	High	High	High	High	High	High	High	Q8CJ19 [1148-1161]		3.65	100	1	84.9	93.2	83.8
FALSE	High	[K].QNDVFGEADQ.[-]	P50396	Rab GDP dissociation inhibitor alpha OS=Mus musculus GN=Gdi1 PE=1 SV=3		0.761448	0.0624376	1	0.300172	0.13	-0.35	0.11	-0.33	1.092	0.785	1.081	0.793	31.6	29	24.8	31.3	6.59	9.99	8.42	14.14	High	High	High	High	High	High	High	High	High	High	High	High	High	High	High	High	P50396 [438-447]		2.75	100	1	34.4	32.1	29.4
FALSE	High	[K].QNTESPR.[A-]	G3X932	DNA segment, Chr 15, Wayne State University 169, expressed, isoform CRA_a OS=Mus musculus GN=Arhgap39 PE=1 SV=1		0.942935	0.973149	0.358673	0.300297	0	0	0.33	-0.32	0.999	1.003	1.253	0.8	27.3	27.3	27.4	34.2	22.87	4.97	14.08	30.25	High	High	High	High	High	High	High	High	High	High	High	High	High	High	High	High	G3X932 [113-119]	G3X932 1xPhospho [S117(100)]	2.17	100	1	26.4	31.2	28.2
FALSE	High	[R].FAESLPSDEEGENYSK.[E]	P22005	Proenkephalin-A OS=Mus musculus GN=Penk PE=1 SV=2		1	0.914881	0.63252	0.300458	-0.05	0.27	-0.31	0.54	0.969	1.207	0.804	1.455	26.4	27.2	31.8	21.9	27.58	24.23	22.13	8.83	High	High	High	High	High	High	High	High	High	High	High	High	High	High	High	High	P22005 [238-253]	P22005 1xPhospho [S244(99.4)]	1.9	100	1	19.9	24.5	28.5
FALSE	High	[K].FIDKDQQPSGSEGEDDDAEAALK.[K]	Q99J36	THUMP domain-containing protein 1 OS=Mus musculus GN=Thumpd1 PE=1 SV=1		0.662893	0.999528	0.936628	0.30114	-0.2	0.07	0.05	-0.18	0.87	1.049	1.035	0.882	43.2	49.7	45.4	51.5	13.5	4.22	8.52	13.59	High	High	High	High	High	High	High	High	High	High	High	High	High	High	High	High	Q99J36 [78-100]	Q99J36 2xPhospho [S86(100); S88(100)]	2.71	100	1	42.1	54.5	44.4
FALSE	High	[K].AVEEQGDDQDSEKSKPAGSDGER.[R]	Q00PI9	Heterogeneous nuclear ribonucleoprotein U-like protein 2 OS=Mus musculus GN=Hnrnpul2 PE=1 SV=2		0.855455	0.873035	0.318986	0.30185	0.26	-0.21	-0.47	0.52	1.193	0.863	0.721	1.43	31.2	26.2	26.9	18.8	19.76	14.78	26.58	28.97	High	High	High	High	High	High	High	High	High	High	High	High	High	High	High	High	Q00PI9 [173-195]	Q00PI9 3xPhospho [S183(100); S186(100); S191(100)]	4.84	100	1	29.6	32.9	33.2
FALSE	High	[R].SECDSSPEPK.[A]	Q8BTI8	Serine/arginine repetitive matrix protein 2 OS=Mus musculus GN=Srrm2 PE=1 SV=3		0.874949	0.620061	0.545177	0.302057	-0.17	0.13	-0.21	0.17	0.888	1.095	0.864	1.126	49.2	55.4	53.9	47.8	17.9	13.22	6.88	7.88	High	High	High	High	High	High	High	High	High	High	High	High	High	High	High	High	Q8BTI8 [1434-1443]	Q8BTI8 2xPhospho [S1438(100); S1439(100)]	3.25	100	1	59.6	52.3	46.2
FALSE	High	[R].SRECSLSPK.[S]	Q9WV69	Dematin OS=Mus musculus GN=Dmtn PE=1 SV=1		0.97203	0.252009	0.941926	0.302666	-0.01	-0.17	-0.05	-0.12	0.991	0.892	0.963	0.918	29.9	30.2	26.7	29.1	13.63	12.97	19.26	7.3	High	High	High	High	High	High	High	High	High	High	High	High	High	High	High	High	Q9WV69 [81-89]	Q9WV69 2xPhospho [S85(100); S87(100)]	1.84	100	1	27.1	26.7	34.8
FALSE	High	[R].TASLTSAASIDGSR.[S]	Q9QYG0	Protein NDRG2 OS=Mus musculus GN=Ndrg2 PE=1 SV=1		0.999855	0.99991	0.307613	0.303179	-0.02	0.21	-0.5	0.69	0.984	1.158	0.706	1.614	14.2	14.4	16.4	10.2	33.28	21.17	28.52	17.1	High	High	High	High	High	High	High	High	High	High	High	High	High	High	High	High	Q9QYG0 [330-343]	Q9QYG0 3xPhospho [T334(100); S335(100); S338(100)]	2.79	100	1	21.7	12.6	15.9
FALSE	High	[R].IQAAASPPANATAASDTNAGDR.[G]	E9QAQ5	Glycogen synthase kinase-3 beta OS=Mus musculus GN=Gsk3b PE=1 SV=1		0.20666	0.999829	0.98562	0.303204	-0.37	0.01	-0.11	-0.24	0.774	1.01	0.923	0.847	13.6	17.5	13.7	16.2	17.89	10.5	9.13	15.33	High	High	High	High	High	High	High	High	High	High	High	High	High	High	High	High	E9QAQ5 [397-418]		2.03	100	1	12	13.8	17.9
FALSE	High	[R].ASCEALYSEMDPEER.[L]	A2AIR9	Voltage-dependent N-type calcium channel subunit alpha OS=Mus musculus GN=Cacna1b PE=1 SV=1		0.130157	0.923353	0.999916	0.303364	-0.24	0.05	0.05	-0.24	0.847	1.038	1.038	0.847	17.3	20.4	17.9	21.2	13.26	11.61	13.65	9.51	High	High	High	High	High	High	High	High	High	High	High	High	High	High	High	High	A2AIR9 [782-796]	A2AIR9 1xPhospho [S783(100)]	4.09	100	1	18.3	17.1	13.3
FALSE	High	[K].SASEDSIR.[K]	B1AWN6	Sodium channel protein OS=Mus musculus GN=Scn2a PE=1 SV=1		0.632961	0.825536	0.473601	0.303383	-0.27	0.19	0.25	-0.33	0.831	1.138	1.188	0.796	60.9	73.3	69.3	87.1	20.9	22.49	14.92	6.3	High	High	High	High	High	High	High	High	High	High	High	High	High	High	High	High	B1AWN6 [526-533]	B1AWN6 1xPhospho [S528(100)]	1.84	100	1	53.1	66.8	55.5
FALSE	High	[R].SSPGSVAASPSGGGGR.[R]	S4R1M9	Oxysterol-binding protein-related protein 10 OS=Mus musculus GN=Osbpl10 PE=1 SV=1		0.829431	0.714903	0.22258	0.303689	0.2	-0.24	-0.38	0.34	1.146	0.848	0.767	1.267	19.3	16.8	16.4	12.9	10.06	21.29	12.32	13.64	High	High	High	High	High	High	High	High	High	High	High	High	High	High	High	High	S4R1M9 [58-73]	S4R1M9 2xPhospho [S66(100); S]	3.51	100	1	19.2	19.9	19.4
FALSE	High	[R].DSGLEDGRESPSFDTPSQR.[V]	B1AWV9	Anion exchange protein OS=Mus musculus GN=Slc4a10 PE=1 SV=1		0.220693	0.833859	0.0430913	0.304351	0.2	-0.07	0.33	-0.21	1.146	0.953	1.259	0.867	34.5	30.1	32.8	37.8	15.64	9.1	7.52	7.52	High	High	High	High	High	High	High	High	High	High	High	High	High	High	High	High	B1AWV9 [80-98]	B1AWV9 1xPhospho [S89(100)]	3.07	100	1	29.6	37	32.1
FALSE	High	[K].EEVASEPEEAASPTTPK.[K]	A2APD7	Nucleolar protein 56 (Fragment) OS=Mus musculus GN=Nop56 PE=1 SV=1		0.974515	0.420788	0.998176	0.304736	-0.02	-0.15	-0.03	-0.15	0.988	0.898	0.983	0.903	15.7	15.9	14.1	15.6	4.55	9.88	2.9	15.45	High	High	High	High	High	High	High	High	High	High	High	High	High	High	High	High	A2APD7 [248-264]	A2APD7 1xPhospho [S252(100)]	2.35	100	1	15.5	15.9	16.4
FALSE	High	[R].SPSIDSIQKDPR.[E]	O35927; Q68FH0	Catenin delta-2 OS=Mus musculus GN=Ctnnd2 PE=1 SV=1 Plakophilin-4 OS=Mus musculus GN=Pkp4 PE=1 SV=1	Shared	0.891367	0.976026	0.449821	0.305359	0.08	0.13	-1.04	1.25	1.06	1.095	0.487	2.385	45.1	42.6	49.4	20.7	34.79	41.66	48.73	23.23	High	High	High	High	High	High	High	High	High	High	High	High	High	High	High	High	O35927 [529-540]; Q68FH0 [509-520]	O35927 2xPhospho [S531(100); S534(100)]; Q68FH0 2xPhospho [S511(100); S514(100)]	1.96	100	2	68.7	42.1	48.4
FALSE	High	[R].RGSSLEEMTGVSAGVEGSQQATPTLSAAPAGEAGTR.[L]	Q3UHD3	Microtubule-associated tumor suppressor candidate 2 homolog OS=Mus musculus GN=Mtus2 PE=1 SV=1		0.986824	0.217809	0.999663	0.305476	-0.17	0.44	-0.01	0.28	0.886	1.36	0.992	1.215	8.3	9.4	11.3	9.3	17.95	6.1	15.28	22.03	High	High	High	High	High	High	High	High	High	High	High	High	High	High	High	High	Q3UHD3 [362-397]	Q3UHD3 2xPhospho [S364(100); S365(100)]	3.71	100	1	7.9	8.6	8
FALSE	High	[K].SPLNDASDDDDDDDSSD.[-]	Q91WB4	Pleckstrin homology domain-containing family F member 2 OS=Mus musculus GN=Plekhf2 PE=1 SV=1		0.805414	0.920357	0.989801	0.30578	0.04	0.13	-0.14	0.31	1.031	1.092	0.909	1.239	19.3	18.8	21.1	17.1	22.27	18.78	13.94	9.35	High	High	High	High	High	High	High	High	High	High	High	High	High	High	High	High	Q91WB4 [233-249]	Q91WB4 2xPhospho [S239(100); S248(99.4)]	1.85	100	1	20.6	16.7	18.2
FALSE	High	[K].SYRSASPER.[T]	Q3TZK9	Zinc finger protein 638 (Fragment) OS=Mus musculus GN=Zfp638 PE=1 SV=1		0.999929	0.612603	0.949961	0.306216	-0.05	-0.11	0.05	-0.22	0.965	0.923	1.035	0.862	76.6	79.4	70.7	82.1	9.31	12.26	11.27	12.67	High	High	High	High	High	High	High	High	High	High	High	High	High	High	High	High	Q3TZK9 [557-565]	Q3TZK9 2xPhospho [S560(100); S562(100)]	2.84	100	1	75.4	72.8	77.9
FALSE	High	[K].IAEDPSRDGPSPTSGSSK.[T]	E9Q401	Ryanodine receptor 2 OS=Mus musculus GN=Ryr2 PE=1 SV=1		0.912679	0.445922	0.782209	0.306356	0.09	-0.24	0.09	-0.24	1.061	0.85	1.065	0.846	15.5	14.6	13.1	15.5	14.57	14.75	9.27	22.78	High	High	High	High	High	High	High	High	High	High	High	High	High	High	High	High	E9Q401 [2352-2369]	E9Q401 2xPhospho [S2362(99.2); S2367(99.2)]	2.76	100	1	18.9	16.1	13.5
FALSE	High	[R].SKTPPSNLSPIEDASPTEELR.[Q]	O88737	Protein bassoon OS=Mus musculus GN=Bsn PE=1 SV=4		0.946699	0.523615	0.765315	0.306402	0.01	-0.17	0.07	-0.24	1.004	0.887	1.048	0.85	38.9	38.7	34.5	40.6	10.52	17.41	17.31	4.06	High	High	High	High	High	High	High	High	High	High	High	High	High	High	High	High	O88737 [1100-1120]	O88737 2xPhospho [S1108(100); S1114(99)]	3.46	100	1	44.3	41.2	35.3
FALSE	High	[R].LLHEDLDESDDDVDEK.[L]	Q7SIG6	Arf-GAP with SH3 domain, ANK repeat and PH domain-containing protein 2 OS=Mus musculus GN=Asap2 PE=1 SV=3		0.45466	0.648994	0.473726	0.307229	-0.07	0.1	0.25	-0.23	0.952	1.07	1.192	0.854	47.1	49.5	50.4	59	9.02	22.06	5.94	5.46	High	High	High	High	High	High	High	High	High	High	High	High	High	High	High	High	Q7SIG6 [696-711]	Q7SIG6 1xPhospho [S704(100)]	4.85	100	1	49	45.3	49.3
FALSE	High	[K].GSAEGSSDEEGKLVIDEPAKEK.[N]	P51859	Hepatoma-derived growth factor OS=Mus musculus GN=Hdgf PE=1 SV=2		0.91969	0.842213	0.396254	0.307885	0.16	-0.18	0.19	-0.2	1.12	0.884	1.137	0.871	88.1	78.6	77.9	89.4	14.27	7.94	8.34	5.68	High	High	High	High	High	High	High	High	High	High	High	High	High	High	High	High	P51859 [127-148]	P51859 2xPhospho [S132(100); S133(100)]	6.97	100	1	89.5	95.9	86.7
FALSE	High	[R].NESSHGGEFGCTMEELR.[S]	Q3UHH0; S4R1C4	Calcium-transporting ATPase OS=Mus musculus GN=Atp2b2 PE=1 SV=1 Calcium-transporting ATPase OS=Mus musculus GN=Atp2b2 PE=1 SV=1	Shared	0.993208	0.925889	0.779075	0.308014	0.09	0.05	-0.05	0.2	1.067	1.039	0.965	1.148	74.1	69.5	77	67.1	6.62	13.96	8.73	9.1	High	High	High	High	High	High	High	High	High	High	High	High	High	High	High	High	Q3UHH0 [16-32]; S4R1C4 [16-32]	Q3UHH0 1xPhospho [S18(99.7)]; S4R1C4 1xPhospho [S18(99.7)]	4.81	100	2	78.9	73.6	67.1
FALSE	High	[R].TPEEGGYSYEISEK.[T]	P14873	Microtubule-associated protein 1B OS=Mus musculus GN=Map1b PE=1 SV=2		0.978241	0.999922	0.471853	0.308384	0.02	-0.03	-0.29	0.27	1.012	0.976	0.817	1.209	23.7	23.5	23.2	19.2	7.35	17.87	24.18	12.49	High	High	High	High	High	High	High	High	High	High	High	High	High	High	High	High	P14873 [1945-1958]	P14873 1xPhospho [T1945(100)]	1.87	100	1	23.4	21.4	24.1
FALSE	High	[K].KEDSDDSLVDYGEGVNGQFNEDGSFIGQYSGK.[K]	Q810U4	Neuronal cell adhesion molecule OS=Mus musculus GN=Nrcam PE=1 SV=2		0.995706	0.967399	0.669913	0.308466	-0.13	0.15	0.24	-0.22	0.917	1.108	1.181	0.86	80.5	87.9	89.3	103.8	23.64	18.5	18.59	9.54	High	High	High	High	High	High	High	High	High	High	High	High	High	High	High	High	Q810U4 [1200-1231]	Q810U4 2xPhospho [S1203(100); S1206(100)]	6.06	100	1	82.4	121.7	78.8
FALSE	High	[K].GAYVPSSPTR.[L]	Q80W47	WD repeat domain phosphoinositide-interacting protein 2 OS=Mus musculus GN=Wipi2 PE=1 SV=1		0.925795	0.526704	0.997759	0.309131	0.05	0.12	0.01	0.16	1.035	1.087	1.01	1.114	235.2	227.3	255.8	229.6	6.73	9.07	9.07	7.75	High	High	High	High	High	High	High	High	High	High	High	High	High	High	High	High	Q80W47 [389-398]		2.54	100	1	253.5	215.5	231.5
FALSE	High	[R].QMDTNNDGK.[L]	E9PV73	Neuron-specific calcium-binding protein hippocalcin (Fragment) OS=Mus musculus GN=Hpca PE=1 SV=1		0.972048	0.714778	0.64572	0.309508	0.1	-0.2	0.14	-0.24	1.07	0.872	1.099	0.849	14.8	13.8	12.9	15.2	25.86	9.67	23.91	29.92	High	High	High	High	High	High	High	High	High	High	High	High	High	High	High	High	E9PV73 [155-163]		2.78	100	1	10.6	13.6	19.7
FALSE	High	[R].MDSFDEDLARPSGLLAQER.[K]	Q569Z6	Thyroid hormone receptor-associated protein 3 OS=Mus musculus GN=Thrap3 PE=1 SV=1		0.874015	0.998767	0.793201	0.309589	0.05	0.07	-0.29	0.41	1.037	1.047	0.816	1.33	13.2	12.8	13.9	10.4	10.81	22.71	26.81	14.9	High	High	High	High	High	High	High	High	High	High	High	High	High	High	High	High	Q569Z6 [570-588]	Q569Z6 1xPhospho [S572(100)]	1.25	100	1	13.5	12.9	15.1
FALSE	High	[R].GLDSAR.[R]	O89053	Coronin-1A OS=Mus musculus GN=Coro1a PE=1 SV=5		0.794092	0.979382	0.586433	0.309757	0.46	-0.21	-0.88	1.13	1.375	0.862	0.543	2.184	89.5	65.1	77.2	35.4	35.34	45.34	34.99	34.18	High	High	High	High	High	High	High	High	High	High	High	High	High	High	High	High	O89053 [409-414]	O89053 1xPhospho [S412(100)]	1.64	100	1	98.8	81.2	102.6
FALSE	High	[R].TGSPELAAR.[A]	E9PZ19	Protein turtle homolog B OS=Mus musculus GN=Igsf9b PE=1 SV=1		0.952025	0.988531	0.406064	0.309856	-0.12	0.1	0.25	-0.27	0.922	1.069	1.189	0.829	17.9	19.4	19.1	23.1	4.88	21.43	19.83	17.63	High	High	High	High	High	High	High	High	High	High	High	High	High	High	High	High	E9PZ19 [1213-1221]		1.55	100	1	19.2	17.3	17.5
FALSE	High	[K].TETQEKNPLPSK.[E]	P20065	Thymosin beta-4 OS=Mus musculus GN=Tmsb4x PE=1 SV=1		0.922162	0.226991	0.976536	0.310637	0.07	-0.3	0.02	-0.25	1.049	0.812	1.011	0.843	25.8	24.6	21	24.9	5.22	10.22	24.97	16.28	High	High	High	High	High	High	High	High	High	High	High	High	High	High	High	High	P20065 [27-38]	P20065 1xPhospho [T29(99.5)]	1.88	100	1	26.9	26.9	24.8
FALSE	High	[R].SIQEDTK.[R]	Q69ZW3	EH domain-binding protein 1 OS=Mus musculus GN=Ehbp1 PE=1 SV=3		0.650042	0.982345	0.74949	0.311918	0.15	0.01	-0.28	0.44	1.107	1.009	0.826	1.353	12	10.8	12.1	8.9	19.47	13.42	13.05	30.87	High	High	High	High	High	High	High	High	High	High	High	High	High	High	High	High	Q69ZW3 [1038-1044]	Q69ZW3 1xPhospho [S1038(100)]	1.73	100	1	12	10.8	11.9
FALSE	High	[K].SDAAPAASDSKPSSAEPAPSSK.[E]	Q91XV3	Brain acid soluble protein 1 OS=Mus musculus GN=Basp1 PE=1 SV=3		0.997957	0.923673	0.743408	0.314578	-0.01	-0.06	0.2	-0.28	0.993	0.957	1.151	0.826	19.8	19.9	18.9	22.9	2.51	18.18	17.67	10.06	High	High	High	High	High	High	High	High	High	High	High	High	High	High	High	High	Q91XV3 [160-181]		4.73	100	1	19.8	19.4	19.7
FALSE	High	[K].SEPSSPDHGSSAIEQDLAALDAEMTQK.[L]	Q9Z1B3	1-phosphatidylinositol 4,5-bisphosphate phosphodiesterase beta-1 OS=Mus musculus GN=Plcb1 PE=1 SV=2		0.354504	0.576402	0.628204	0.314733	0.25	0.56	0.34	0.47	1.191	1.47	1.266	1.382	59.1	49.7	86.9	62.9	55.35	8.3	10.07	5.68	High	High	High	High	High	High	High	High	High	High	High	High	High	High	High	High	Q9Z1B3 [978-1004]		6.52	100	1	137.3	46.2	55.5
FALSE	High	[K].AESCGSFDETESEESSK.[L]	Q9CRB0	Sorting nexin-24 OS=Mus musculus GN=Snx24 PE=1 SV=1		0.707986	0.999993	0.894543	0.316881	-0.08	-0.09	0.24	-0.41	0.948	0.941	1.184	0.753	10.1	10.6	9.5	12.6	21.63	23.29	14.37	18.46	High	High	High	High	High	High	High	High	High	High	High	High	High	High	High	High	Q9CRB0 [111-127]	Q9CRB0 1xPhospho [S116(100)]	3.5	100	1	7.1	10.3	9.8
FALSE	High	[R].TVNDLEDSYGQQWTYEQR.[K]	A0A0G2JGX4	Sodium/potassium-transporting ATPase subunit alpha OS=Mus musculus GN=Atp1a3 PE=1 SV=1		0.915035	0.632476	0.136361	0.317264	-0.04	0.15	0.31	-0.2	0.971	1.112	1.237	0.873	16.4	16.9	18.2	20.9	10.32	8.44	12.58	14.98	High	High	High	High	High	High	High	High	High	High	High	High	High	High	High	High	A0A0G2JGX4 [897-914]		3.51	100	1	18.4	17	14.4
FALSE	High	[K].AELAPETTETPVETPETVQATDLSLNPEEGSK.[A]	E9PUL5	Proline-rich transmembrane protein 2 OS=Mus musculus GN=Prrt2 PE=1 SV=1		0.985936	0.999896	0.450237	0.317426	0.1	-0.06	-0.16	0.2	1.074	0.959	0.898	1.147	31.6	29.4	30.3	26.4	8.15	16.66	19.28	20.88	High	High	High	High	High	High	High	High	High	High	High	High	High	High	High	High	E9PUL5 [65-96]	E9PUL5 1xPhospho [T74(99.4)]	6.1	100	1	28.6	34.5	30.5
FALSE	High	[R].RHSTEGPEDPPPWAEK.[V]	B2RW11	Ankyrin repeat domain 34A OS=Mus musculus GN=Ankrd34a PE=1 SV=1		0.964659	0.818718	0.965809	0.318345	0.1	0.3	0.06	0.34	1.073	1.228	1.039	1.267	15.7	14.6	19.3	15.2	30.16	26.39	27.41	12.95	High	High	High	High	High	High	High	High	High	High	High	High	High	High	High	High	B2RW11 [288-303]		3.07	100	1	24.8	14.4	17.1
FALSE	High	[R].KLSRSPSPR.[R]	E9Q6E5	Protein Srsf11 OS=Mus musculus GN=Srsf11 PE=1 SV=1		0.94242	0.0723515	0.462362	0.31866	-0.06	0.35	0.11	0.18	0.96	1.275	1.077	1.136	22.2	23.1	28.3	24.9	13.57	11.69	8.22	6.44	High	High	High	High	High	High	High	High	High	High	High	High	High	High	High	High	E9Q6E5 [392-400]	E9Q6E5 3xPhospho [S394(100); S396(100); S398(100)]	1.53	100	1	22.2	20.6	22.2
FALSE	High	[K].AMAEEDNGSIGEETDSSPGR.[K]	A0A1B0GRA5	Stromal interaction molecule 1 OS=Mus musculus GN=Stim1 PE=1 SV=1		0.834011	0.371346	0.776269	0.319141	0.09	-0.23	0.25	-0.38	1.067	0.851	1.185	0.766	11.1	10.4	9.4	12.3	23.79	18.09	29.64	30.61	High	High	High	High	High	High	High	High	High	High	High	High	High	High	High	High	A0A1B0GRA5 [760-779]	A0A1B0GRA5 1xPhospho [S775(98.2)]	3.42	100	1	11.4	10	10.7
FALSE	High	[K].LEKEEEEGISQESSEEEQ.[-]	P17095	High mobility group protein HMG-I/HMG-Y OS=Mus musculus GN=Hmga1 PE=1 SV=4		0.55966	0.999519	0.937782	0.319148	-0.15	0.02	0	-0.13	0.903	1.017	1.003	0.915	88.9	98.5	90.5	98.9	5.3	8.77	11.04	4.92	High	High	High	High	High	High	High	High	High	High	High	High	High	High	High	High	P17095 [90-107]	P17095 3xPhospho [S99(100); S102(100); S103(100)]	5.16	100	1	88.8	85.5	96.8
FALSE	High	[R].ASSFDSSR.[H]	Q9QYC1	Pecanex-like protein 1 OS=Mus musculus GN=Pcnx1 PE=1 SV=3		0.948268	0.994399	0.0958946	0.319332	0.1	-0.05	0.35	-0.29	1.073	0.967	1.271	0.816	12.9	12	12.4	15.3	5.4	20.56	19.48	14.06	High	High	High	High	High	High	High	High	High	High	High	High	High	High	High	High	Q9QYC1 [572-579]		0.97	100	1	13.4	13.2	11.9
FALSE	High	[R].SRGSPRYSPR.[H]	H7BX95	Serine/arginine-rich-splicing factor 1 OS=Mus musculus GN=Srsf1 PE=1 SV=1		0.939121	0.998548	0.529854	0.319599	-0.11	-0.02	0.28	-0.41	0.923	0.989	1.217	0.75	70.1	75.9	69.3	92.4	11	22.33	25.67	7.23	High	High	High	High	High	High	High	High	High	High	High	High	High	High	High	High	H7BX95 [231-240]	H7BX95 2xPhospho [S234(99.5); S238(100)]	2.3	100	1	71.7	64.2	68.5
FALSE	High	[K].STGDSQNLGSSSPGR.[K]	B1ATI9	Growth arrest-specific protein 7 OS=Mus musculus GN=Gas7 PE=1 SV=1		0.981426	0.839296	0.555382	0.320085	0.18	-0.35	0.37	-0.54	1.133	0.787	1.296	0.688	9.7	8.5	7.6	11	32.87	26.91	13.83	11.23	High	High	High	High	High	High	High	High	High	High	High	High	High	High	High	High	B1ATI9 [88-102]	B1ATI9 1xPhospho [S99(99.5)]	4.57	100	1	5.6	13.3	10
FALSE	High	[R].SASSDTSEELNSQDSPK.[R]	P70441	Na(+)/H(+) exchange regulatory cofactor NHE-RF1 OS=Mus musculus GN=Slc9a3r1 PE=1 SV=3		0.502907	0.332235	0.518295	0.320175	-0.11	-0.21	-0.11	-0.21	0.927	0.863	0.926	0.863	51.9	56	44.8	51.9	8.61	15.44	9.71	5.76	High	High	High	High	High	High	High	High	High	High	High	High	High	High	High	High	P70441 [283-299]		3.07	100	1	49.5	46.6	56.2
FALSE	High	[R].VFSQENVCDR.[I]	E9Q3M9	Protein 2010300C02Rik OS=Mus musculus GN=2010300C02Rik PE=1 SV=1		0.141238	0.0373178	0.0954984	0.320374	0.21	-0.46	-0.54	0.29	1.159	0.725	0.688	1.222	78.8	67.9	57.1	46.7	17.87	24.76	3.78	1.7	High	High	High	High	High	High	High	High	High	High	High	High	High	High	High	High	E9Q3M9 [111-120]	E9Q3M9 1xPhospho [S113(100)]	2.8	100	1	71.7	82.8	104.8
FALSE	High	[K].GASAATGIPLESDEDSNDNDNDLENENCMHTN.[-]	Q8R5H1	Ubiquitin carboxyl-terminal hydrolase 15 OS=Mus musculus GN=Usp15 PE=1 SV=1		0.999886	0.999802	0.260918	0.320588	0.09	-0.05	0.25	-0.21	1.067	0.966	1.188	0.867	26.9	25.2	25.9	29.9	15.09	17.67	8.33	5.2	High	High	High	High	High	High	High	High	High	High	High	High	High	High	High	High	Q8R5H1 [950-981]	Q8R5H1 2xPhospho [T955(98.5); S961(98.5)]	3.76	100	1	20.1	25.7	28.5
FALSE	High	[R].RELSRSGDLAPPESPSSPGQASPR.[H]	Q8BNN1	Spermatogenesis-associated protein 2-like protein OS=Mus musculus GN=Spata2l PE=1 SV=1		0.290548	0.146465	0.555719	0.32073	0.44	-0.41	0.31	-0.28	1.352	0.755	1.242	0.822	21.7	16	16.4	19.9	16.89	19.72	20.63	26.02	High	High	High	High	High	High	High	High	High	High	High	High	High	High	High	High	Q8BNN1 [313-336]	Q8BNN1 3xPhospho [S316(100); S318(100); S329(98.9)]	4.18	100	1	22.5	27.4	20.9
FALSE	High	[K].LDSPTLSR.[A]	Q61165	Sodium/hydrogen exchanger 1 OS=Mus musculus GN=Slc9a1 PE=1 SV=1		0.844054	0.486297	0.665933	0.320802	0.17	-0.26	0.16	-0.24	1.128	0.838	1.116	0.847	79.5	70.5	66.6	78.6	14.82	6.96	13.74	3.81	High	High	High	High	High	High	High	High	High	High	High	High	High	High	High	High	Q61165 [695-702]	Q61165 1xPhospho [S697(100)]	1.96	100	1	81.7	88.2	61.4
FALSE	High	[R].TATSASASPTLR.[V]	Q80TZ3	Putative tyrosine-protein phosphatase auxilin OS=Mus musculus GN=Dnajc6 PE=1 SV=2		0.519591	0.215723	0.681349	0.321657	0.12	-0.2	0.08	-0.16	1.088	0.87	1.058	0.895	17.9	16.4	15.6	17.4	13.73	9.53	11.71	15.74	High	High	High	High	High	High	High	High	High	High	High	High	High	High	High	High	Q80TZ3 [588-599]	Q80TZ3 1xPhospho [T590(98.5)]	1.49	100	1	16	16.8	19.1
FALSE	High	[R].NESPGR.[I]	Q8BJ42	Disks large-associated protein 2 OS=Mus musculus GN=Dlgap2 PE=1 SV=2		0.967259	0.511579	0.838517	0.321699	0.07	-0.19	0.01	-0.14	1.05	0.874	1.008	0.911	54.2	51.6	47.4	52.1	17.07	9.53	22.38	13.87	High	High	High	High	High	High	High	High	High	High	High	High	High	High	High	High	Q8BJ42 [226-231]	Q8BJ42 1xPhospho [S228(100)]	1.79	100	1	50.1	61	58.8
FALSE	High	[R].TLDCEPK.[C]	P15105	Glutamine synthetase OS=Mus musculus GN=Glul PE=1 SV=6		0.980731	0.577766	0.999449	0.321887	0.12	-0.5	0.05	-0.43	1.083	0.706	1.032	0.741	9.3	8.5	6.5	8.8	27.38	22.54	41.27	6.65	High	High	High	High	High	High	High	High	High	High	High	High	High	High	High	High	P15105 [46-52]		1.73	100	1	9.2	9.4	4.9
FALSE	High	[K].KEESEESEDDMGFGLFD.[-]	E9Q3T0	Protein Gm10073 OS=Mus musculus GN=Gm10073 PE=1 SV=1		0.484626	0.736624	0.547988	0.321972	-0.6	0.3	0.37	-0.67	0.66	1.232	1.29	0.631	33.6	50.9	41.4	65.7	26.61	30.36	33.2	33.74	High	High	High	High	High	High	High	High	High	High	High	High	High	High	High	High	E9Q3T0 [98-114]	E9Q3T0 1xPhospho [S101(100)]	4.6	100	1	33.5	33.8	32.3
FALSE	High	[K].MLPELFQDDEKAISPTSATSSGR.[T]	Q99104	Unconventional myosin-Va OS=Mus musculus GN=Myo5a PE=1 SV=2		0.283177	0.896547	0.0484887	0.322055	0.19	-0.11	0.35	-0.27	1.139	0.925	1.271	0.829	55	48.3	50.9	61.4	15.28	14.16	6.49	9.85	High	High	High	High	High	High	High	High	High	High	High	High	High	High	High	High	Q99104 [587-609]	Q99104 1xPhospho [S600(100)]	5.25	100	1	45.4	57.5	52.6
FALSE	High	[R].ASPALGSGHHDGSGDSLEMSSLDR.[A]	Q9CZW5	Mitochondrial import receptor subunit TOM70 OS=Mus musculus GN=Tomm70 PE=1 SV=2		0.287465	0.932963	0.904606	0.322779	0.2	0.26	0.05	0.41	1.149	1.198	1.038	1.326	40.4	35.2	48.4	36.5	22.86	11.53	23.96	4.62	High	High	High	High	High	High	High	High	High	High	High	High	High	High	High	High	Q9CZW5 [93-116]	Q9CZW5 1xPhospho [S94(100)]	7.73	100	1	57.6	38.1	42.9
FALSE	High	[K].NSLETVGTPDSGRGR.[G]	Q9R0N7	Synaptotagmin-7 OS=Mus musculus GN=Syt7 PE=1 SV=1		0.999955	0.993455	0.424089	0.322807	-0.03	0.07	0.23	-0.19	0.977	1.052	1.172	0.876	41.7	42.7	43.9	50.1	15.54	11.43	12.65	10.93	High	High	High	High	High	High	High	High	High	High	High	High	High	High	High	High	Q9R0N7 [51-65]	Q9R0N7 3xPhospho [S52(100); T58(100); S61(100)]	4.67	100	1	43.1	52.7	40.4
FALSE	High	[R].TNSEQVDEDADVDTAMASLDEQSR.[E]	Q8C6M1	Ubiquitin carboxyl-terminal hydrolase 20 OS=Mus musculus GN=Usp20 PE=1 SV=1		0.961801	0.264979	0.922671	0.322869	0.02	-0.52	-0.04	-0.47	1.011	0.696	0.974	0.722	14.2	14	9.9	13.7	19.61	17.91	24.43	12.61	High	High	High	High	High	High	High	High	High	High	High	High	High	High	High	High	Q8C6M1 [340-363]	Q8C6M1 1xPhospho [S342(99.7)]	6.71	100	1	13.5	16	15
FALSE	High	[R].HRDTGILDSIGR.[F]	F6VME3; P04370; F6RT34; F6RWW8; F6ZIA4	Myelin basic protein (Fragment) OS=Mus musculus GN=Mbp PE=1 SV=1 Myelin basic protein OS=Mus musculus GN=Mbp PE=1 SV=2 Myelin basic protein (Fragment) OS=Mus musculus GN=Mbp PE=1 SV=1 Myelin basic protein (Fragment) OS=Mus musculus GN=Mbp PE=1 SV=1 Myelin basic protein (Fragment) OS=Mus musculus GN=Mbp PE=1 SV=1	Shared	0.800025	0.843169	0.999918	0.323494	0.11	0.14	0.07	0.17	1.076	1.098	1.047	1.129	15.7	14.6	17.2	15.3	14.74	20.55	20.8	20.52	High	High	High	High	High	High	High	High	High	High	High	High	High	High	High	High	F6VME3 [55-66]; P04370 [164-175]; F6RT34 [48-59]; F6RWW8 [53-64]; F6ZIA4 [30-41]		3.32	100	5	20.1	15.3	16.1
FALSE	High	[R].IERQESSEQETPTRGELVK.[G]	E9PX29	Protein Sptbn4 OS=Mus musculus GN=Sptbn4 PE=1 SV=1		0.839646	0.397544	0.759667	0.323819	0.05	-0.17	0.04	-0.16	1.037	0.886	1.026	0.896	17.5	16.9	15.5	17.3	12.02	18.64	18.44	5.16	High	High	High	High	High	High	High	High	High	High	High	High	High	High	High	High	E9PX29 [2296-2314]	E9PX29 3xPhospho [S2301(100); S2302(100); T2306(100)]	1.87	100	1	16.9	18.1	14.5
FALSE	High	[R].TALPTSGSSTGELELLAGEVPAR.[S]	Q80VP1	Epsin-1 OS=Mus musculus GN=Epn1 PE=1 SV=3		0.928457	0.987763	0.462589	0.323902	-0.09	0.04	0.46	-0.51	0.941	1.031	1.38	0.704	16.3	17.3	16.8	23.8	8.44	15.52	9.06	42.46	High	High	High	High	High	High	High	High	High	High	High	High	High	High	High	High	Q80VP1 [411-433]	Q80VP1 1xPhospho [S418(99)]	6.02	100	1	14.1	16.8	15.7
FALSE	High	[R].ELYLSNNGIEVIEGLENNNK.[L]	Q3UM45	Protein phosphatase 1 regulatory subunit 7 OS=Mus musculus GN=Ppp1r7 PE=1 SV=2		0.794239	0.476877	0.621775	0.324499	-0.06	0.21	-0.33	0.49	0.959	1.16	0.793	1.402	24	25.1	27.9	19.9	24.59	9.18	6.77	33.82	High	High	High	High	High	High	High	High	High	High	High	High	High	High	High	High	Q3UM45 [257-276]		4.81	100	1	15.4	22.3	25.9
FALSE	High	[R].GLNSSMDMAR.[L]	A0A0A6YVS6	Ras/Rap GTPase-activating protein SynGAP (Fragment) OS=Mus musculus GN=Syngap1 PE=1 SV=2		0.971151	0.702946	0.675708	0.3249	0.13	-0.23	0.15	-0.25	1.092	0.853	1.111	0.838	57.1	52.3	48.7	58.1	14.85	12.57	11.34	2.97	High	High	High	High	High	High	High	High	High	High	High	High	High	High	High	High	A0A0A6YVS6 [761-770]	A0A0A6YVS6 1xPhospho [S765(99.3)]	1.52	100	1	58	44.6	64.5
FALSE	High	[R].RDYDDMSPR.[R]	H3BKD0	Heterogeneous nuclear ribonucleoprotein K (Fragment) OS=Mus musculus GN=Hnrnpk PE=1 SV=1		0.393493	0.358362	0.430451	0.325369	0.14	0.12	0.11	0.15	1.103	1.087	1.082	1.108	54.1	49.1	58.9	53.1	2.62	5.23	14.08	6.3	High	High	High	High	High	High	High	High	High	High	High	High	High	High	High	High	H3BKD0 [254-262]	H3BKD0 1xPhospho [S260(100)]	2.05	100	1	52.7	53.7	54.6
FALSE	High	[R].HDTPDLSPPR.[R]	Q8R149	BUD13 homolog OS=Mus musculus GN=Bud13 PE=1 SV=1		0.477942	0.90466	0.0948294	0.325655	0.11	-0.11	0.19	-0.19	1.076	0.927	1.141	0.874	30.3	28.1	28.1	32.1	5.71	13.84	8.08	6.06	High	High	High	High	High	High	High	High	High	High	High	High	High	High	High	High	Q8R149 [194-203]; [207-216]	Q8R149 2xPhospho [T196(100); S200(100)]; 2xPhospho [T209(100); S213(100)]	3.24	100	1	29.5	31.1	27.6
FALSE	High	[K].IAKEEESEEESNEEEEEDDEEESESEAK.[S]	A0A140LHP6	Probable global transcription activator SNF2L2 OS=Mus musculus GN=Smarca2 PE=1 SV=1		0.727588	0.986866	0.712417	0.326282	-0.55	0.09	0.5	-0.97	0.681	1.061	1.417	0.51	10	14.7	10.6	20.8	57.08	34.4	47.72	10.75	High	High	High	High	High	High	High	High	High	High	High	High	High	High	High	High	A0A140LHP6 [194-221]	A0A140LHP6 2xPhospho [S200(100); S204(100)]	5.22	100	1	7.3	9.5	10.5
FALSE	High	[K].SSFSNSADDIK.[S]	Q61686	Chromobox protein homolog 5 OS=Mus musculus GN=Cbx5 PE=1 SV=1		0.447202	0.999995	0.995835	0.326954	0.1	0.1	-0.13	0.33	1.074	1.07	0.915	1.256	14.8	13.8	15.8	12.6	22.07	27.7	25.24	14.27	High	High	High	High	High	High	High	High	High	High	High	High	High	High	High	High	Q61686 [92-102]		3.18	100	1	21.7	15.3	14.1
FALSE	High	[R].TSLPQHVMEPPVGAAAAGTSGSSLDSFSK.[G]	A0A0N4SVB5	Proline-rich transmembrane protein 3 OS=Mus musculus GN=Prrt3 PE=1 SV=1		0.852796	0.999298	0.117655	0.327039	-0.13	-0.13	-0.44	0.17	0.913	0.912	0.738	1.128	7.9	8.7	7.2	6.4	9.28	20.39	18.08	28.47	High	High	High	High	High	High	High	High	High	High	High	High	High	High	High	High	A0A0N4SVB5 [874-902]	A0A0N4SVB5 2xPhospho [T892(98.7); S/T]	2.02	100	1	8	7.9	6.5
FALSE	High	[K].SGMSPEQSK.[T]	Q8BTI8	Serine/arginine repetitive matrix protein 2 OS=Mus musculus GN=Srrm2 PE=1 SV=3		0.788343	0.448912	0.648924	0.327172	0.1	-0.18	0.18	-0.26	1.07	0.884	1.132	0.835	17.3	16.2	15.3	18.4	14.25	17.76	9.76	21.91	High	High	High	High	High	High	High	High	High	High	High	High	High	High	High	High	Q8BTI8 [1094-1102]	Q8BTI8 1xPhospho [S1097(100)]	2.76	100	1	16.2	17.5	22.1
FALSE	High	[R].SRTGSESSQTGASATSGR.[N]	Q8BGD9	Eukaryotic translation initiation factor 4B OS=Mus musculus GN=Eif4b PE=1 SV=1		0.852347	0.703462	0.218119	0.327605	0.53	-0.8	-0.52	0.24	1.44	0.575	0.699	1.185	11.9	8.3	6.9	5.8	26.44	10.04	44.57	35.37	High	High	High	High	High	High	High	High	High	High	High	High	High	High	High	High	Q8BGD9 [418-435]		2.48	100	1	6.4	12	12.3
FALSE	High	[K].RQESTETLVVDR.[S]	A0A087WQD8	TRAF3-interacting protein 1 OS=Mus musculus GN=Traf3ip1 PE=1 SV=1		0.598355	0.784081	0.204935	0.327893	0.06	-0.05	0.27	-0.26	1.045	0.967	1.207	0.837	16.5	15.8	15.9	19	17.36	13.23	12.91	16	High	High	High	High	High	High	High	High	High	High	High	High	High	High	High	High	A0A087WQD8 [435-446]	A0A087WQD8 1xPhospho [S438(100)]	1.52	100	1	15.7	22.1	15.5
FALSE	High	[K].GSPEQQRHPHPGSSPEVLPK.[H]	E0CX32	Coiled-coil domain-containing protein 85A OS=Mus musculus GN=Ccdc85a PE=1 SV=1		0.999966	0.489251	0.992176	0.328002	0.08	0.1	0.04	0.15	1.057	1.074	1.026	1.106	20	18.9	21.5	19.4	13.74	8.49	5.11	10.94	High	High	High	High	High	High	High	High	High	High	High	High	High	High	High	High	E0CX32 [283-302]	E0CX32 2xPhospho [S284(100); S]	2.7	100	1	18.8	16.3	21.3
FALSE	High	[K].LDSPSRSPSKVEVTEK.[M]	Q80X80	C2 domain-containing protein 2-like OS=Mus musculus GN=C2cd2l PE=1 SV=3		0.263083	0.0322884	0.957653	0.328539	0.25	-0.41	0	-0.16	1.187	0.755	0.998	0.898	80.8	68.1	61	68	18.26	8.03	12.01	14.48	High	High	High	High	High	High	High	High	High	High	High	High	High	High	High	High	Q80X80 [462-477]	Q80X80 2xPhospho [S468(100); S/T]	3.13	100	1	84.6	102.4	77.3
FALSE	High	[R].ERAPSPASR.[M]	Q8BTI8	Serine/arginine repetitive matrix protein 2 OS=Mus musculus GN=Srrm2 PE=1 SV=3		0.763187	0.991397	0.0437438	0.328636	0.14	0.02	0.31	-0.15	1.101	1.015	1.239	0.902	36.6	33.3	37.2	41.2	16.02	10.29	9.31	21.91	High	High	High	High	High	High	High	High	High	High	High	High	High	High	High	High	Q8BTI8 [2377-2385]	Q8BTI8 1xPhospho [S2381(99.5)]	2.14	100	1	29.6	33.9	39.6
FALSE	High	[K].TPDASPEPK.[D]	Q3TXS7	26S proteasome non-ATPase regulatory subunit 1 OS=Mus musculus GN=Psmd1 PE=1 SV=1		0.823299	0.858578	0.999236	0.329659	-0.32	-0.17	0.04	-0.53	0.799	0.89	1.028	0.692	16.1	20.1	14.3	20.7	14.76	30.41	36.64	12.97	High	High	High	High	High	High	High	High	High	High	High	High	High	High	High	High	Q3TXS7 [311-319]	Q3TXS7 1xPhospho [S315(100)]	2.09	100	1	14.6	19.4	17.7
FALSE	High	[R].TPGEDSLPLPAEEEGAASTAQTPCSLSASLCFSSGDDSPPQSR.[A]	Q8BNW9	Kelch repeat and BTB domain-containing protein 11 OS=Mus musculus GN=Kbtbd11 PE=1 SV=3		0.9852	0.636271	0.995541	0.329768	-0.1	-0.33	0.25	-0.68	0.932	0.795	1.186	0.625	7.3	7.9	5.8	9.3	28.86	31.2	28.95	26.83	High	High	High	High	High	High	High	High	High	High	High	High	High	High	High	High	Q8BNW9 [18-60]	Q8BNW9 3xPhospho [S50(100); S51(100); S55(100)]	4.63	100	1	5.7	8.7	6.2
FALSE	High	[R].HGSGADSDYENTQSGDPLLGLEGK.[R]	Q68FF6	ARF GTPase-activating protein GIT1 OS=Mus musculus GN=Git1 PE=1 SV=1		0.902225	0.968154	0.44335	0.330951	0.17	-0.06	-0.09	0.19	1.124	0.956	0.94	1.143	42	37.4	40.1	35.1	11.89	13.9	17.7	27.11	High	High	High	High	High	High	High	High	High	High	High	High	High	High	High	High	Q68FF6 [599-622]	Q68FF6 2xPhospho [S601(100); S605(100)]	6.65	100	1	44.4	39.7	48.4
FALSE	High	[K].GNKSPSPPPDGSPAATPEIR.[V]	Q6P1B9	Bin1 protein OS=Mus musculus GN=Bin1 PE=1 SV=1		0.999465	0.9775	0.473885	0.331026	0.02	0	0.12	-0.1	1.011	1	1.087	0.93	70.8	70	70.8	76.1	1.75	7.64	6.41	5.67	High	High	High	High	High	High	High	High	High	High	High	High	High	High	High	High	Q6P1B9 [262-281]	Q6P1B9 2xPhospho [S267(100); S273(100)]	5.23	100	1	71.1	72.8	70.4
FALSE	High	[R].SPSGGAAGPLLTPSQSLDGSRR.[S]	A0A0R4J2B2	BTB/POZ domain-containing protein KCTD12 OS=Mus musculus GN=Kctd12 PE=1 SV=1		0.982903	0.408682	0.996946	0.331853	0.06	0.14	0.01	0.19	1.042	1.1	1.008	1.137	76.6	73.5	84.2	74.1	8.64	14.78	5.49	7.58	High	High	High	High	High	High	High	High	High	High	High	High	High	High	High	High	A0A0R4J2B2 [187-208]	A0A0R4J2B2 2xPhospho [S187(99.2); S/T]	5.88	100	1	78	67.4	75.2
FALSE	High	[R].CTSLGPVGDGAGSDCSDPEDTEDAFQR.[S]	E9Q3I3	Spermatogenesis-associated protein 13 OS=Mus musculus GN=Spata13 PE=1 SV=1		0.0416616	0.223105	0.875409	0.332858	0.39	-0.31	-0.1	0.18	1.31	0.808	0.935	1.132	9.9	7.5	8	7.1	6.33	10.97	15.88	11.78	High	High	High	High	High	High	High	High	High	High	High	High	High	High	High	High	E9Q3I3 [146-172]	E9Q3I3 2xPhospho [S158(99.9); S161(99.9)]	1.44	100	1	9.9	9.1	10.7
FALSE	High	[K].SESLDEEEKLELQRR.[L]	F7D425	cAMP-regulated phosphoprotein 21 (Fragment) OS=Mus musculus GN=Arpp21 PE=1 SV=1		0.840355	0.998562	0.697661	0.333513	0.24	0.03	-0.01	0.28	1.179	1.02	0.991	1.213	20.1	17	20.5	16.9	13.96	17.4	14.05	30.79	High	High	High	High	High	High	High	High	High	High	High	High	High	High	High	High	F7D425 [28-42]		2.1	100	1	19.1	21	22.8
FALSE	High	[K].KGQGGAGAGDDEEED.[-]	Q6ZWN5	40S ribosomal protein S9 OS=Mus musculus GN=Rps9 PE=1 SV=3		0.899433	0.566609	0.677101	0.334049	0.01	-0.24	0.05	-0.28	1.008	0.848	1.036	0.825	20.7	20.5	17.5	21.3	10.23	28.03	4.23	12.35	High	High	High	High	High	High	High	High	High	High	High	High	High	High	High	High	Q6ZWN5 [180-194]		2.16	100	1	18.6	22.5	22.5
FALSE	High	[R].TSSLTHSEEK.[S]	Q9CT10	Ran-binding protein 3 OS=Mus musculus GN=Ranbp3 PE=1 SV=2		1	0.429511	0.996853	0.334093	0.03	0.2	0.02	0.21	1.018	1.146	1.012	1.153	47.1	46.3	54	46.8	4.66	21.92	4.98	8.14	High	High	High	High	High	High	High	High	High	High	High	High	High	High	High	High	Q9CT10 [56-65]		2.33	100	1	47.1	44.3	49.7
FALSE	High	[K].GSETPGATPGSK.[I]	G5E866	Splicing factor 3B subunit 1 OS=Mus musculus GN=Sf3b1 PE=1 SV=1		0.380807	0.987847	0.973609	0.334203	0.32	-0.07	0.02	0.23	1.252	0.953	1.013	1.177	21.7	17.3	20.7	17.6	15.31	16.52	20.37	17.1	High	High	High	High	High	High	High	High	High	High	High	High	High	High	High	High	G5E866 [241-252]	G5E866 2xPhospho [T244(100); T248(100)]	3.33	100	1	26.6	18.6	22.7
FALSE	High	[R].TDSTSDGRPAWMR.[T]	Q9JHU4	Cytoplasmic dynein 1 heavy chain 1 OS=Mus musculus GN=Dync1h1 PE=1 SV=2		0.739106	0.852026	0.999918	0.334629	0.12	0.33	0.1	0.34	1.084	1.253	1.074	1.266	18.2	16.8	22.9	18.1	15.05	13.88	23.45	22.21	High	High	High	High	High	High	High	High	High	High	High	High	High	High	High	High	Q9JHU4 [4364-4376]		1.46	100	1	18	24.1	18.4
FALSE	High	[K].SDDSKSSSPEPVTHLK.[W]	Q5FWK3	Rho GTPase-activating protein 1 OS=Mus musculus GN=Arhgap1 PE=1 SV=1		0.205035	0.884186	0.979732	0.334749	0.68	-0.19	0.04	0.45	1.601	0.879	1.03	1.367	40.9	25.5	36	26.3	21.67	22.6	19	18.21	High	High	High	High	High	High	High	High	High	High	High	High	High	High	High	High	Q5FWK3 [44-59]		4.34	100	1	43.1	44.1	38.8
FALSE	High	[R].MLPHAPGVQMQAIPEDAVHEDSGDEDGEDPDKR.[I]	A0A0R4J008	Histone deacetylase OS=Mus musculus GN=Hdac2 PE=1 SV=1		0.324748	0.952314	0.946039	0.335397	-0.06	-0.06	0	-0.11	0.962	0.961	0.999	0.926	22.9	23.8	22	23.8	5.96	11.97	5.99	6.57	High	High	High	High	High	High	High	High	High	High	High	High	High	High	High	High	A0A0R4J008 [373-405]	A0A0R4J008 1xPhospho [S394(100)]	6.71	100	1	23.3	23.4	22.6
FALSE	High	[K].TVTPASSAK.[T]	O08553	Dihydropyrimidinase-related protein 2 OS=Mus musculus GN=Dpysl2 PE=1 SV=2		0.948709	0.999817	0.666949	0.335466	0.56	-0.27	-0.48	0.77	1.478	0.827	0.718	1.701	65.5	44.4	54.2	31.8	42.53	47.03	31.28	16.05	High	High	High	High	High	High	High	High	High	High	High	High	High	High	High	High	O08553 [512-520]	O08553 2xPhospho [T514(100); S517(99.6)]	2.49	100	1	73.8	72.1	59.6
FALSE	High	[K].HLEELEEKSATPPPAEPASLPQEPPK.[A]	P97379	Ras GTPase-activating protein-binding protein 2 OS=Mus musculus GN=G3bp2 PE=1 SV=2		0.838254	0.86101	0.358347	0.335487	-0.16	0.13	0.21	-0.25	0.892	1.091	1.161	0.839	22.9	25.7	25	29.8	7.91	22.77	7.26	15.37	High	High	High	High	High	High	High	High	High	High	High	High	High	High	High	High	P97379 [217-242]	P97379 2xPhospho [S225(100); T227(100)]	2.88	100	1	22	23.9	24.7
FALSE	High	[K].TEGDSPAAALSPQMHQEPVQQDFSGK.[T]	Q8C8R3	Ankyrin-2 OS=Mus musculus GN=Ank2 PE=1 SV=2		0.928497	0.308777	0.907647	0.335568	0.05	-0.26	-0.05	-0.16	1.037	0.836	0.966	0.898	27.6	26.6	23.1	25.7	18.82	7.05	8.86	2.14	High	High	High	High	High	High	High	High	High	High	High	High	High	High	High	High	Q8C8R3 [3682-3707]	Q8C8R3 1xPhospho [S3692(100)]	5.86	100	1	19.1	27.5	30.6
FALSE	High	[K].SPQVLYSPVSPLSPHR.[L]	O88737	Protein bassoon OS=Mus musculus GN=Bsn PE=1 SV=4		0.938276	0.999149	0.177317	0.33661	-0.23	0.11	-0.68	0.56	0.85	1.079	0.623	1.473	15	17.7	16.2	11	24.9	24.9	24.37	26.3	High	High	High	High	High	High	High	High	High	High	High	High	High	High	High	High	O88737 [2799-2814]	O88737 3xPhospho [S2805(100); S2808(100); S2811(100)]	5.26	100	1	16.7	12.9	21.7
FALSE	High	[R].AQRPPEGMSPELPPR.[D]	A0A0R4J0W7	Serine/threonine-protein kinase LMTK3 OS=Mus musculus GN=Lmtk3 PE=1 SV=1		0.89088	0.856183	0.301082	0.336732	-0.2	0.28	0.38	-0.3	0.868	1.215	1.299	0.812	7.9	9.1	9.6	11.8	24.71	11.79	11.47	20.75	High	High	High	High	High	High	High	High	High	High	High	High	High	High	High	High	A0A0R4J0W7 [224-238]	A0A0R4J0W7 1xPhospho [S232(100)]	0.87	100	1	7.9	12.1	7.8
FALSE	High	[R].SNATNSSYSPPTGR.[A]	Q60610	T-lymphoma invasion and metastasis-inducing protein 1 OS=Mus musculus GN=Tiam1 PE=1 SV=1		0.939943	0.230565	0.990281	0.336732	0.13	0.2	0	0.33	1.091	1.152	1.001	1.256	27	24.7	31.1	24.7	15.05	17.77	6.7	10.47	High	High	High	High	High	High	High	High	High	High	High	High	High	High	High	High	Q60610 [350-363]	Q60610 1xPhospho [S358(100)]	1.92	100	1	26.7	28	27.3
FALSE	High	[R].SQGSSQFR.[S]	Q6PD03	Serine/threonine-protein phosphatase 2A 56 kDa regulatory subunit alpha isoform OS=Mus musculus GN=Ppp2r5a PE=1 SV=1		0.772498	0.897825	0.471777	0.336985	0.15	-0.11	-0.51	0.54	1.106	0.925	0.702	1.457	36.7	33.2	34	23.3	18.14	34.53	15.91	40.99	High	High	High	High	High	High	High	High	High	High	High	High	High	High	High	High	Q6PD03 [38-45]	Q6PD03 2xPhospho [S41(100); S42(100)]	2.04	100	1	36	37.5	50.5
FALSE	High	[K].VDGPRSPSYGR.[S]	H7BX95	Serine/arginine-rich-splicing factor 1 OS=Mus musculus GN=Srsf1 PE=1 SV=1		0.699628	0.995399	0.806071	0.337166	-0.45	0.15	0.18	-0.49	0.73	1.106	1.135	0.711	13.3	18.2	14.7	20.6	29.94	20.38	33.95	12.96	High	High	High	High	High	High	High	High	High	High	High	High	High	High	High	High	H7BX95 [194-204]	H7BX95 1xPhospho [S199(100)]	2.16	100	1	16.9	18.2	10.4
FALSE	High	[K].SRSPGTPAGEGSGSPPK.[W]	Q9QYC0; F8WGR0	Alpha-adducin OS=Mus musculus GN=Add1 PE=1 SV=2 Alpha-adducin OS=Mus musculus GN=Add1 PE=1 SV=1	Shared	0.284288	0.960329	0.98299	0.337807	-0.31	-0.06	-0.02	-0.36	0.806	0.959	0.99	0.781	9	11.2	8.7	11.1	25.78	17.65	23.46	16.59	High	High	High	High	High	High	High	High	High	High	High	High	High	High	High	High	Q9QYC0 [353-369]; F8WGR0 [353-369]		2.04	100	2	9.1	8.9	9.9
FALSE	High	[K].EHYPVSSPSSPSPPAQPGGVSR.[N]	E9Q804	Ankyrin repeat domain-containing protein 17 OS=Mus musculus GN=Ankrd17 PE=1 SV=3		0.987766	0.191959	0.999866	0.338064	-0.08	0.37	0.05	0.24	0.946	1.29	1.037	1.177	15.2	16.1	19.6	16.7	13.6	11.38	16.79	9.83	High	High	High	High	High	High	High	High	High	High	High	High	High	High	High	High	E9Q804 [2031-2052]	E9Q804 2xPhospho [S2039(97.4); S2042(99.1)]	3.42	100	1	14.8	14.1	19
FALSE	High	[R].GGSGYHSRSPTR.[Q]	Q8BTI8	Serine/arginine repetitive matrix protein 2 OS=Mus musculus GN=Srrm2 PE=1 SV=3		0.398406	0.68463	0.75555	0.338417	0.27	0.53	0.15	0.65	1.206	1.442	1.112	1.565	18.1	15	26.1	16.7	47.36	22.44	18.99	25.77	High	High	High	High	High	High	High	High	High	High	High	High	High	High	High	High	Q8BTI8 [1772-1783]	Q8BTI8 2xPhospho [S1778(100); S1780(99.5)]	1.92	100	1	37.4	18.5	14.3
FALSE	High	[R].VLQKPSVFGSDSDDDETSVSESLQR.[E]	Q5NCR9	Nuclear speckle splicing regulatory protein 1 OS=Mus musculus GN=Nsrp1 PE=1 SV=1		0.978941	0.0666947	0.912291	0.338642	0.1	-0.62	-0.15	-0.37	1.075	0.652	0.902	0.776	10.2	9.5	6.7	8.6	14.45	20.8	39.78	5.29	High	High	High	High	High	High	High	High	High	High	High	High	High	High	High	High	Q5NCR9 [22-46]	Q5NCR9 2xPhospho [S31(100); S33(100)]	4.91	100	1	9.9	10.6	12.5
FALSE	High	[R].LALSEDTEPSSSESR.[T]	A2A699	Protein FAM171A2 OS=Mus musculus GN=Fam171a2 PE=1 SV=1		0.817093	0.739836	0.409292	0.338929	0.16	-0.37	0.36	-0.58	1.114	0.772	1.282	0.671	8.8	7.9	6.8	10.1	16.44	25.27	24.84	16.25	High	High	High	High	High	High	High	High	High	High	High	High	High	High	High	High	A2A699 [720-734]	A2A699 2xPhospho [S729(100); S/T]	2.87	100	1	9.6	6.7	9.6
FALSE	High	[R].SYQNSPSSEDGIRPLPEYSTEK.[H]	Q925J9	Mediator of RNA polymerase II transcription subunit 1 OS=Mus musculus GN=Med1 PE=1 SV=2		0.285	0.99899	0.993025	0.339399	0.39	-0.03	0.12	0.23	1.31	0.979	1.089	1.176	19.6	14.9	19.1	16.3	11.15	10.7	21.65	22.65	High	High	High	High	High	High	High	High	High	High	High	High	High	High	High	High	Q925J9 [1477-1498]	Q925J9 2xPhospho [S1481(99.6); S/Y/T]	3.35	100	1	21.9	16.7	19
FALSE	High	[R].MFSNPDNGSPAMTHR.[N]	E9Q8N8; O88343	Anion exchange protein OS=Mus musculus GN=Slc4a4 PE=1 SV=1 Electrogenic sodium bicarbonate cotransporter 1 OS=Mus musculus GN=Slc4a4 PE=1 SV=2	Shared	0.838108	1	0.096038	0.340877	-0.05	0.06	-0.19	0.19	0.966	1.039	0.877	1.144	25	25.9	26	22.7	10.9	12.18	3.63	10.56	High	High	High	High	High	High	High	High	High	High	High	High	High	High	High	High	E9Q8N8 [237-251]; O88343 [237-251]	E9Q8N8 1xPhospho [S245(100)]; O88343 1xPhospho [S245(100)]	4.23	100	2	26.2	23.4	23.9
FALSE	High	[R].TVSQQSFDGVSLDSGGPDDR.[I]	B2KF50	Protein Uhrf1bp1 OS=Mus musculus GN=Uhrf1bp1 PE=1 SV=1		0.872105	0.999491	0.0910694	0.342326	-0.18	0.07	-0.49	0.38	0.884	1.05	0.713	1.303	16.3	18.4	17.1	13.1	20.57	9.45	12.91	21.62	High	High	High	High	High	High	High	High	High	High	High	High	High	High	High	High	B2KF50 [1093-1112]	B2KF50 2xPhospho [S1095(100); S1098(100)]	4.11	100	1	22.2	13.9	16.5
FALSE	High	[R].ASSIDSASNTELQTHDMSSDEKK.[V]	E9Q3Y4	Lipopolysaccharide-responsive and beige-like anchor protein OS=Mus musculus GN=Lrba PE=1 SV=1		0.874766	0.996702	0.856593	0.342332	-0.03	0.17	-0.35	0.49	0.98	1.123	0.783	1.405	14.8	15.1	16.6	11.8	14.57	19.61	22.38	28.62	High	High	High	High	High	High	High	High	High	High	High	High	High	High	High	High	E9Q3Y4 [998-1020]		3.25	100	1	19	14.3	15.2
FALSE	High	[R].TEARSSDEENGPPSSPDLDR.[I]	F6R8S6	Proline-rich AKT1 substrate 1 (Fragment) OS=Mus musculus GN=Akt1s1 PE=1 SV=9		0.872839	0.767401	0.999996	0.342532	-0.04	-0.24	0.09	-0.37	0.971	0.849	1.067	0.772	13	13.4	11.1	14.3	21.65	39.25	13.59	27.13	High	High	High	High	High	High	High	High	High	High	High	High	High	High	High	High	F6R8S6 [205-224]		2.05	100	1	14.7	11.6	15.6
FALSE	High	[R].QSQGTTPDTTPARTPTEEGTPTSEQNPFLFQEGK.[L]	Q8C8R3	Ankyrin-2 OS=Mus musculus GN=Ank2 PE=1 SV=2		0.766297	0.697728	0.401911	0.342938	0.13	-0.2	0.27	-0.34	1.094	0.87	1.206	0.789	18.7	17.1	16.3	20.6	11.61	23.55	13.48	19.04	High	High	High	High	High	High	High	High	High	High	High	High	High	High	High	High	Q8C8R3 [3031-3064]	Q8C8R3 3xPhospho [T3044(99.9); T3046(100); T3050(100)]	3.94	100	1	16.9	18.5	18.9
FALSE	High	[R].GSNSDSPPGHPAPAPSPER.[R]	A2ARS0	Ankyrin repeat domain-containing protein 63 OS=Mus musculus GN=Ankrd63 PE=1 SV=1		0.967066	0.293743	0.985563	0.34324	0.08	-0.24	0.01	-0.16	1.057	0.849	1.006	0.892	74.5	70.4	63.2	70.9	8.25	9.69	17.55	7.04	High	High	High	High	High	High	High	High	High	High	High	High	High	High	High	High	A2ARS0 [188-206]	A2ARS0 3xPhospho [S189(100); S203(100); S]	5.04	100	1	79.4	65.5	76.8
FALSE	High	[R].TGLCSPEDNSLTPLLDEVVAPEGR.[A]	A2A699	Protein FAM171A2 OS=Mus musculus GN=Fam171a2 PE=1 SV=1		0.594257	0.981638	0.999633	0.343796	-0.09	-0.08	-0.05	-0.12	0.942	0.948	0.968	0.923	56.6	60.1	53.7	58.1	8.83	5.79	6.12	11.01	High	High	High	High	High	High	High	High	High	High	High	High	High	High	High	High	A2A699 [735-758]	A2A699 1xPhospho [S739(97.7)]	3.12	100	1	49.5	56.8	56.4
FALSE	High	[-].MDDREDLVYQAK.[L]	P62259	14-3-3 protein epsilon OS=Mus musculus GN=Ywhae PE=1 SV=1		0.589548	0.472099	0.258684	0.344618	0.11	-0.17	-0.27	0.22	1.078	0.891	0.827	1.161	29	26.9	25.8	22.2	16.51	11.88	14.38	16.68	High	High	High	High	High	High	High	High	High	High	High	High	High	High	High	High	P62259 [1-12]	P62259 1xAcetyl [N-Term]	2.19	100	1	38.5	28.6	29.3
FALSE	High	[R].EGGEGGGSRR.[S]	E9PX29	Protein Sptbn4 OS=Mus musculus GN=Sptbn4 PE=1 SV=1		0.844309	0.221997	0.955742	0.34465	0.29	-0.48	0.29	-0.49	1.221	0.715	1.227	0.711	13.2	10.8	9.4	13.2	33.5	38.17	21.01	21.9	High	High	High	High	High	High	High	High	High	High	High	High	High	High	High	High	E9PX29 [2385-2394]	E9PX29 1xPhospho [S2392(100)]	1.36	100	1	10.5	15.2	21.2
FALSE	High	[K].KDWDDDQND.[-]	H3BL49	T-complex protein 1 subunit theta OS=Mus musculus GN=Cct8 PE=1 SV=1		0.0168961	0.051437	0.133811	0.344693	0.21	-0.13	0.15	-0.07	1.16	0.911	1.107	0.955	41.2	35.5	37.5	39.3	6.8	8.93	3.17	4.01	High	High	High	High	High	High	High	High	High	High	High	High	High	High	High	High	H3BL49 [481-489]		1.5	100	1	46.2	41.1	41.2
FALSE	High	[R].QESLERR.[I]	E9PVP4	Ena/VASP-like protein OS=Mus musculus GN=Evl PE=1 SV=1		0.741344	0.992839	0.756282	0.344868	-0.11	0.03	0.08	-0.16	0.925	1.022	1.056	0.895	60.5	65.5	61.9	69.1	7.87	10.9	5.47	7.53	High	High	High	High	High	High	High	High	High	High	High	High	High	High	High	High	E9PVP4 [135-141]	E9PVP4 1xPhospho [S137(100)]	1.71	100	1	57.6	63	68
FALSE	High	[K].GSTSSTRLHEPEK.[N]	E0CX65	Tyrosine-protein phosphatase non-receptor type substrate 1 OS=Mus musculus GN=Sirpa PE=1 SV=1		0.445853	0.884764	0.952071	0.344952	0.19	0.05	0.06	0.18	1.142	1.038	1.045	1.134	30.2	26.4	31.3	27.6	13.04	14.24	10.27	20.26	High	High	High	High	High	High	High	High	High	High	High	High	High	High	High	High	E0CX65 [68-80]		2.34	100	1	33.7	26.7	27
FALSE	High	[R].SVSPSDSLPCSLAGSPTPSPVPSPAPAGL.[-]	P58334	Krueppel-like factor 16 OS=Mus musculus GN=Klf16 PE=1 SV=2		0.648599	0.132032	0.925642	0.345409	0.33	-0.63	0.23	-0.53	1.261	0.644	1.175	0.691	9.5	7.6	6.2	8.9	11.78	26.16	34.91	14.4	High	High	High	High	High	High	High	High	High	High	High	High	High	Not Found	High	High	P58334 [223-251]		2.13	94	1	9.6	9.5	11.3
FALSE	High	[R].VPGGSPRTPNR.[S]	Q8R1Q8	Cytoplasmic dynein 1 light intermediate chain 1 OS=Mus musculus GN=Dync1li1 PE=1 SV=1		0.889623	0.556947	0.988959	0.34561	-0.18	-0.5	-0.21	-0.46	0.884	0.709	0.865	0.725	7.8	8.8	5.5	7.6	26	20.33	40.49	24.85	High	High	High	High	High	High	High	High	High	High	High	High	High	High	High	High	Q8R1Q8 [401-411]	Q8R1Q8 2xPhospho [S405(100); T408(100)]	1.62	100	1	8.5	7.1	10.1
FALSE	High	[R].SLDQDSPSK.[K]	A2AAE1	Uncharacterized protein KIAA1109 OS=Mus musculus GN=Kiaa1109 PE=1 SV=4		0.983496	0.615612	0.824385	0.345745	0.09	-0.12	0.13	-0.16	1.064	0.922	1.092	0.898	7.9	7.4	7.3	8.1	21.36	16.2	32.92	15.22	High	High	High	High	High	High	High	High	High	High	High	High	High	High	High	High	A2AAE1 [3830-3838]	A2AAE1 1xPhospho [S3835(100)]	2.5	100	1	6.2	9.9	7
FALSE	High	[R].SLMSSPEDLTK.[D]	P14873	Microtubule-associated protein 1B OS=Mus musculus GN=Map1b PE=1 SV=2		0.922086	0.906976	0.968728	0.345953	-0.01	-0.14	0.08	-0.24	0.99	0.906	1.058	0.848	34.3	34.6	31	36.6	19.68	19.61	7.74	16.17	High	High	High	High	High	High	High	High	High	High	High	High	High	High	High	High	P14873 [825-835]	P14873 2xPhospho [S828(100); S829(100)]	3.71	100	1	36.2	40.6	32.4
FALSE	High	[R].GSSDSLDSLSPR.[T]	H3BL28	Protein Ppp1r9a (Fragment) OS=Mus musculus GN=Ppp1r9a PE=1 SV=1		0.503197	0.989492	0.925994	0.346171	-0.36	0.06	0.05	-0.35	0.777	1.042	1.035	0.782	62.5	80.5	65.2	83.4	16.09	18.55	30.72	9.36	High	High	High	High	High	High	High	High	High	High	High	High	High	High	High	High	H3BL28 [183-194]	H3BL28 2xPhospho [S190(100); S192(100)]	3.19	100	1	58.3	66	59.2
FALSE	High	[K].KAEGAGTEEEGTPK.[E]	Q91XV3	Brain acid soluble protein 1 OS=Mus musculus GN=Basp1 PE=1 SV=3		0.995774	0.560932	0.919598	0.346332	0.03	-0.2	0	-0.17	1.023	0.87	1.003	0.887	72.8	71.2	63.4	71.4	17.13	12.61	15.07	11.53	High	High	High	High	High	High	High	High	High	High	High	High	High	High	High	High	Q91XV3 [25-38]	Q91XV3 2xPhospho [T31(100); T36(100)]	2.06	100	1	83.8	76.5	69.2
FALSE	High	[R].SRKSSGTPTMNGGK.[V]	P61329	Fibroblast growth factor 12 OS=Mus musculus GN=Fgf12 PE=1 SV=1		0.973877	0.996223	0.447709	0.346418	-0.02	-0.02	0.34	-0.37	0.989	0.985	1.262	0.772	17.8	18	17.6	22.7	23.29	15.63	13.22	18.79	High	High	High	High	High	High	High	High	High	High	High	High	High	High	High	High	P61329 [223-236]		3.41	100	1	12.2	15.9	21.1
FALSE	High	[K].SEPSSPDHGSSAIEQDLAALDAEMTQK.[L]	Q9Z1B3	1-phosphatidylinositol 4,5-bisphosphate phosphodiesterase beta-1 OS=Mus musculus GN=Plcb1 PE=1 SV=2		0.522395	0.933436	0.99427	0.34643	0.35	0.14	0.17	0.32	1.271	1.103	1.123	1.249	14.1	11.1	15.5	12.4	16.9	17.91	20.86	19.04	High	High	High	High	High	High	High	High	High	High	High	High	High	High	High	High	Q9Z1B3 [978-1004]		4.29	100	1	15.5	12.8	15.6
FALSE	High	[R].DLKGPSSQEDESGGLEDSPDR.[G]	A2AUK5	Band 4.1-like protein 1 OS=Mus musculus GN=Epb41l1 PE=1 SV=1		0.84625	0.99944	0.731057	0.346792	-0.21	0.01	0.25	-0.45	0.865	1.004	1.187	0.732	17.4	20.2	17.5	23.9	34.63	18.88	18.38	12.47	High	High	High	High	High	High	High	High	High	High	High	High	High	High	High	High	A2AUK5 [660-680]	A2AUK5 1xPhospho [S666(100)]	3.3	100	1	14.6	26.7	20.8
FALSE	High	[R].ENGSDNLPPSPGSGDQTLPDHAPF.[-]	A2AUD5	Tumor protein D54 OS=Mus musculus GN=Tpd52l2 PE=1 SV=1		0.99675	0.264091	0.976808	0.34682	-0.06	-0.12	-0.09	-0.1	0.957	0.918	0.942	0.932	111.1	116.2	102	109.4	12.38	4.52	7.04	11.44	High	High	High	High	High	High	High	High	High	High	High	High	High	High	High	High	A2AUD5 [206-229]	A2AUD5 1xPhospho [S215(99.4)]	3.51	100	1	107	99.2	115.4
FALSE	High	[K].HDTSASTQSTPASSR.[A]	Q62261	Spectrin beta chain, non-erythrocytic 1 OS=Mus musculus GN=Sptbn1 PE=1 SV=2		0.198378	0.998238	0.950011	0.348408	0.81	0.49	-0.11	1.41	1.747	1.403	0.925	2.649	8	4.6	11.2	4.2	69.04	40.63	35.46	43.42	High	High	High	High	High	High	Not Found	High	High	High	High	High	High	Not Found	High	High	Q62261 [2310-2324]	Q62261 2xPhospho [S2318(100); T2319(100)]	5.07	88	1	22.1	5.7	8.9
FALSE	High	[K].VFLENVIR.[D]	P62806	Histone H4 OS=Mus musculus GN=Hist1h4a PE=1 SV=2		0.953509	0.763701	0.178937	0.348632	0.02	-0.07	-0.4	0.35	1.017	0.953	0.758	1.279	11	10.8	10.5	8.2	24.98	16.51	18.67	19.27	High	High	High	High	High	High	High	High	High	High	High	High	High	High	High	High	P62806 [61-68]		1.37	100	1	11.4	10.6	9.1
FALSE	High	[R].APESDTGDEDQDQER.[D]	A2AUK5	Band 4.1-like protein 1 OS=Mus musculus GN=Epb41l1 PE=1 SV=1		0.787251	0.661557	0.461772	0.348726	0.14	-0.19	0.25	-0.3	1.102	0.879	1.191	0.813	30.4	27.5	26.7	32.8	4.27	20.37	10.65	14.79	High	High	High	High	High	High	High	High	High	High	High	High	High	High	High	High	A2AUK5 [575-589]	A2AUK5 1xPhospho [S578(100)]	4.06	100	1	29	30.9	32
FALSE	High	[R].VVCDADDSDSDVVSDKSGK.[R]	Q8C1D8	Protein IWS1 homolog OS=Mus musculus GN=Iws1 PE=1 SV=1		0.603921	0.91617	0.998245	0.349236	-0.21	-0.14	-0.05	-0.3	0.866	0.907	0.965	0.813	14.7	17	13.4	16.4	13.77	18.32	14.2	21.68	High	High	High	High	High	High	High	High	High	High	High	High	High	High	High	High	Q8C1D8 [359-377]	Q8C1D8 3xPhospho [S366(100); S368(100); S372(100)]	3.89	100	1	11.8	13.9	15.6
FALSE	High	[R].ASLSPMDEPVPDSESPVEK.[V]	P14873	Microtubule-associated protein 1B OS=Mus musculus GN=Map1b PE=1 SV=2		0.49491	0.989918	0.934083	0.349239	-0.13	0.12	0.1	-0.12	0.911	1.084	1.074	0.92	102.3	112.2	110.8	120.5	10.71	9.94	9.27	5.83	High	High	High	High	High	High	High	High	High	High	High	High	High	High	High	High	P14873 [1370-1388]	P14873 2xPhospho [S1373(100); S1384(100)]	5.43	100	1	96.7	118.5	108.1
FALSE	High	[K].EAPSPTLR.[R]	B2RUG9	Adenomatosis polyposis coli OS=Mus musculus GN=Apc PE=1 SV=1		0.702719	0.816328	0.261137	0.349378	0.16	-0.09	0.26	-0.2	1.114	0.937	1.196	0.873	19.8	17.8	18.6	21.3	14.76	8.5	20.25	12.1	High	High	High	High	High	High	High	High	High	High	High	High	High	High	High	High	B2RUG9 [2446-2453]	B2RUG9 1xPhospho [S2449(100)]	1.29	100	1	22.7	18.8	16
FALSE	High	[R].SNSPENRVPTQQSEDDQPPEEAKR.[T]	A0A087WNU5	Ankyrin-3 (Fragment) OS=Mus musculus GN=Ank3 PE=1 SV=1		0.845696	0.885542	0.393438	0.349435	-0.26	0.15	0.27	-0.38	0.837	1.109	1.209	0.768	15.7	18.7	17.4	22.6	12.67	18.79	12.61	19.52	High	High	High	High	High	High	High	High	High	High	High	High	High	High	High	High	A0A087WNU5 [1378-1401]	A0A087WNU5 1xPhospho [S1380(93.6)]	2.03	100	1	15.1	19.6	16.1
FALSE	High	[R].QNSATERADSIEIYIPEAQTRL.[-]	Q8BJ42	Disks large-associated protein 2 OS=Mus musculus GN=Dlgap2 PE=1 SV=2		0.890797	0.991769	0.188896	0.349477	-0.38	0.28	-0.51	0.41	0.766	1.218	0.701	1.33	11.6	15.1	14.1	10.6	36.11	13.84	5.15	18.94	High	High	High	High	High	High	High	High	High	High	High	High	High	High	High	High	Q8BJ42 [1038-1059]	Q8BJ42 2xPhospho [S1040(98.9); S1047(100)]	2.96	100	1	11.7	11.4	11
FALSE	High	[R].AEQYPGSPDSWV.[-]	Q68FH0	Plakophilin-4 OS=Mus musculus GN=Pkp4 PE=1 SV=1		0.714702	0.874682	0.513241	0.349568	0.33	-0.2	-0.57	0.7	1.255	0.869	0.672	1.622	27.4	21.9	23.8	14.7	27.1	33.18	42.73	24.96	High	High	High	High	High	High	High	High	High	High	High	High	High	High	High	High	Q68FH0 [1179-1190]	Q68FH0 2xPhospho [S1185(100); S1188(100)]	2.94	100	1	37.6	26.8	28.1
FALSE	High	[R].HPSIETLDSPTGSHVEWCK.[Q]	Q9Z2C4	Myotubularin-related protein 1 OS=Mus musculus GN=Mtmr1 PE=1 SV=1		0.802992	0.522822	0.170563	0.349643	0.2	-0.23	-0.1	0.07	1.149	0.853	0.936	1.047	37.5	32.7	32	30.6	7.35	11.17	9.67	11.69	High	High	High	High	High	High	High	High	High	High	High	High	High	High	High	High	Q9Z2C4 [45-63]	Q9Z2C4 2xPhospho [S47(100); S53(100)]	5.18	100	1	32.3	37.8	37.3
FALSE	High	[K].KVLSDSEEEEKDADVPGTSTR.[K]	Q8VDD9	PH-interacting protein OS=Mus musculus GN=Phip PE=1 SV=2		0.304062	0.903893	0.938371	0.349917	-0.27	0.05	0.02	-0.24	0.832	1.033	1.017	0.845	20	24.1	20.7	24.5	11.17	13.45	12.8	15.47	High	High	High	High	High	High	High	High	High	High	High	High	High	High	High	High	Q8VDD9 [1278-1298]	Q8VDD9 2xPhospho [S1281(100); S1283(100)]	2.74	100	1	19.1	21.8	16.9
FALSE	High	[R].GLMAGGRPEGQYSEDEDTDTEEYREAK.[A]	Q3TIR3	Synembryn-A OS=Mus musculus GN=Ric8a PE=1 SV=2		0.291566	0.944716	0.90066	0.350304	0.66	0.1	0.14	0.62	1.581	1.073	1.1	1.542	13.9	8.8	14.9	9.6	24.8	31.19	24.93	24.4	High	High	High	High	High	High	High	High	High	High	High	High	High	High	High	High	Q3TIR3 [423-449]	Q3TIR3 2xPhospho [S435(100); T440(100)]	5.05	100	1	12.7	8.8	15.1
FALSE	High	[R].SRSTTPAPK.[S]	Q8BTI8	Serine/arginine repetitive matrix protein 2 OS=Mus musculus GN=Srrm2 PE=1 SV=3		0.986631	0.99937	0.260685	0.350423	0.03	-0.12	-0.33	0.24	1.022	0.92	0.793	1.185	61.5	60.2	56.6	47.8	22.03	16.67	5.6	6.23	High	High	High	High	High	High	High	High	High	High	High	High	High	High	High	High	Q8BTI8 [248-256]	Q8BTI8 3xPhospho [S250(100); T251(100); T252(100)]	2.58	100	1	67.9	56.3	67.2
FALSE	High	[R].GPQFGSEVELR.[H]	P09470	Angiotensin-converting enzyme OS=Mus musculus GN=Ace PE=1 SV=3		0.888141	0.996572	0.167659	0.350501	0.02	-0.08	-0.36	0.31	1.017	0.949	0.777	1.242	51.8	51	49.2	39.6	18.98	15.42	3.28	14.08	High	High	High	High	High	High	High	High	High	High	High	High	High	High	High	High	P09470 [1300-1310]	P09470 1xPhospho [S1305(100)]	2.73	100	1	55.6	49.9	53.9
FALSE	High	[K].ESDTKNEVNGTSEDIKSEGDTQSN.[-]	Q5SUF2	Luc7-like protein 3 OS=Mus musculus GN=Luc7l3 PE=1 SV=1		0.968326	0.991057	0.429901	0.351094	-0.13	-0.12	0.22	-0.48	0.912	0.918	1.167	0.717	16.3	17.8	14.9	20.8	13.41	20.87	26.59	12.47	High	High	High	High	High	High	High	High	High	High	High	High	High	High	High	High	Q5SUF2 [409-432]	Q5SUF2 2xPhospho [S425(100); S431(100)]	4.31	100	1	16.8	17.5	12.7
FALSE	High	[K].TEDGDWEWSDDEMDEKSEEGK.[A]	Q9Z1W9	STE20/SPS1-related proline-alanine-rich protein kinase OS=Mus musculus GN=Stk39 PE=1 SV=1		0.0877187	0.999971	0.778407	0.351243	-0.19	-0.01	-0.1	-0.1	0.874	0.996	0.936	0.93	110.3	126.2	109.8	118.1	1.87	7.84	6.15	4.19	High	High	High	High	High	High	High	High	High	High	High	High	High	High	High	High	Q9Z1W9 [389-409]	Q9Z1W9 1xPhospho [S397(100)]	5.83	100	1	109.7	110.8	112.8
FALSE	High	[R].SRSLPTSPERR.[A]	A2AJW4	Protein phosphatase 1 regulatory subunit OS=Mus musculus GN=Ppp1r3d PE=1 SV=1		0.962776	0.983935	0.410526	0.351306	0.03	-0.06	0.22	-0.24	1.024	0.96	1.161	0.847	32.7	32	31.4	37.1	17.18	14.56	16.46	17.99	High	High	High	High	High	High	High	High	High	High	High	High	High	High	High	High	A2AJW4 [52-62]	A2AJW4 2xPhospho [S54(99.3); T/S]	3	100	1	23	33.4	32.1
FALSE	High	[K].KEMGTPLADTPTRPVTR.[H]	Q9EQF6	Dihydropyrimidinase-related protein 5 OS=Mus musculus GN=Dpysl5 PE=1 SV=1		0.999613	0.270266	0.990874	0.351381	-0.06	-0.37	-0.04	-0.39	0.956	0.774	0.971	0.763	85.7	89.7	66.4	87	12.94	13.01	33.45	12.57	High	High	High	High	High	High	High	High	High	High	High	High	High	High	High	High	Q9EQF6 [505-521]	Q9EQF6 2xPhospho [T509(100); T514(100)]	4.29	100	1	78.9	77	93.1
FALSE	High	[K].QADVADQQTTELPAENGETENQSPASEEEKEAK.[S]	D3Z607	Non-histone chromosomal protein HMG-14 OS=Mus musculus GN=Hmgn1 PE=1 SV=1		0.994749	0.991304	0.638722	0.351881	0.05	-0.09	0.12	-0.16	1.036	0.941	1.09	0.895	53.9	52.1	50.8	56.7	11.97	7.33	12.45	5.72	High	High	High	High	High	High	High	High	High	High	High	High	High	High	High	High	D3Z607 [52-84]	D3Z607 2xPhospho [S74(100); S77(100)]	8.21	100	1	53.9	53.9	58.3
FALSE	High	[K].GEEATGCAQESQRVETS.[-]	A0A0A6YW88	CaM kinase-like vesicle-associated protein OS=Mus musculus GN=Camkv PE=1 SV=1		0.889554	0.965825	0.944314	0.35194	0.11	-0.18	0.19	-0.25	1.081	0.884	1.139	0.839	46	42.5	40.6	48.4	24.02	18.23	8.66	10.02	High	High	High	High	High	High	High	High	High	High	High	High	High	High	High	High	A0A0A6YW88 [468-484]		1.92	100	1	27.6	44.2	50.1
FALSE	High	[R].TVGHSVVSPQDTVQR.[C]	O35621	Phosphomannomutase 1 OS=Mus musculus GN=Pmm1 PE=1 SV=1		0.999994	0.713482	0.919477	0.352158	-0.03	0.11	-0.02	0.1	0.977	1.079	0.983	1.071	35.8	36.6	38.6	36	13.96	9.39	8.87	8.44	High	High	High	High	High	High	High	High	High	High	High	High	High	High	High	High	O35621 [235-249]	O35621 1xPhospho [S242(100)]	4.6	100	1	31.8	38	43.3
FALSE	High	[R].ALQASALK.[A]	A6ZI44	Fructose-bisphosphate aldolase OS=Mus musculus GN=Aldoa PE=1 SV=1		0.793392	0.996268	0.122782	0.352219	0.16	-0.02	0.36	-0.21	1.12	0.987	1.282	0.862	18	16.1	17.8	20.6	10.98	14.94	21	12.32	High	High	High	High	High	High	High	High	High	High	High	High	High	High	High	High	A6ZI44 [359-366]		2.81	100	1	19.2	16.9	16.1
FALSE	High	[K].GPQQDSDSDDGEALGGNPMVAGFQDDVDIEDQTHGK.[S]	Q5U3K5	Rab-like protein 6 OS=Mus musculus GN=Rabl6 PE=1 SV=2		0.898908	0.331031	0.915979	0.352427	-0.02	0.09	-0.03	0.11	0.989	1.065	0.978	1.078	41	41.4	43.7	40.5	8.97	6.96	12.82	10.45	High	High	High	High	High	High	High	High	High	High	High	High	High	High	High	High	Q5U3K5 [431-466]	Q5U3K5 2xPhospho [S436(100); S438(100)]	11.3	100	1	39.4	43.8	35.7
FALSE	High	[R].SHSLPNSLDYAQASER.[G]	Q3UJU9	Regulator of microtubule dynamics protein 3 OS=Mus musculus GN=Rmdn3 PE=1 SV=2		0.650881	0.0916356	0.990783	0.352449	-0.2	0.36	0.05	0.12	0.872	1.283	1.032	1.084	23.2	26.6	29.8	27.5	16.1	9.19	5.31	15.11	High	High	High	High	High	High	High	High	High	High	High	High	High	High	High	High	Q3UJU9 [44-59]	Q3UJU9 1xPhospho [S46(100)]	4.6	100	1	23.7	21	22.7
FALSE	High	[R].NLLEDDSDEEEDFFLR.[G]	Q8BSN6	Vesicle-associated membrane protein 4 OS=Mus musculus GN=Vamp4 PE=1 SV=1		0.357055	0.144091	0.691163	0.352481	-0.17	0.21	-0.11	0.15	0.89	1.157	0.927	1.11	38.8	43.6	44.9	40.4	8.93	10.99	14.74	7.75	High	High	High	High	High	High	High	High	High	High	High	High	High	High	High	High	Q8BSN6 [24-39]	Q8BSN6 1xPhospho [S30(100)]	1.53	100	1	42.4	40.3	34.5
FALSE	High	[K].TGSYGALAEISASK.[E]	Q9DBR7	Protein phosphatase 1 regulatory subunit 12A OS=Mus musculus GN=Ppp1r12a PE=1 SV=2		0.894924	0.999602	0.680015	0.352547	0.12	0	-0.27	0.39	1.09	0.997	0.829	1.311	13.7	12.6	13.7	10.4	15.22	8.88	30.78	14.74	High	High	High	High	High	High	High	High	High	High	High	High	High	High	High	High	Q9DBR7 [443-456]		3.44	100	1	11.7	12.2	15.4
FALSE	High	[R].RSPSPYYSR.[YG]	E9QP00; P62996	Transformer-2 protein homolog alpha OS=Mus musculus GN=Tra2a PE=1 SV=1 Transformer-2 protein homolog beta OS=Mus musculus GN=Tra2b PE=1 SV=1	Shared	0.419671	0.547394	0.626051	0.353346	0.4	0.38	0.26	0.52	1.322	1.302	1.2	1.435	21.2	16	27.5	19.2	23.39	15.63	23.1	13.18	High	High	High	High	High	High	High	High	High	High	High	High	High	High	High	High	E9QP00 [259-267]; P62996 [263-271]	E9QP00 2xPhospho [S260(100); S262(100)]; P62996 2xPhospho [S264(100); S266(100)]	2.1	100	2	24.5	26.4	15.9
FALSE	High	[R].SSNPPARSQSSDTEQPSPTSGGGK.[V]	Q8BGD9	Eukaryotic translation initiation factor 4B OS=Mus musculus GN=Eif4b PE=1 SV=1		0.421734	0.996036	0.0404449	0.353364	-0.25	0.04	-0.45	0.24	0.84	1.026	0.73	1.18	10.7	12.7	10.9	9.3	5.9	18.33	22.86	21.98	High	High	High	High	High	High	High	High	High	High	High	High	High	High	High	High	Q8BGD9 [488-511]	Q8BGD9 3xPhospho [S495(98.6); S504(100); S/T]	4.32	100	1	10.4	11	9.7
FALSE	High	[K].AAPDITGHK.[R]	H3BIX4	Neuroplastin (Fragment) OS=Mus musculus GN=Nptn PE=1 SV=1		0.993487	0.790448	0.720744	0.353492	0.04	-0.08	0.15	-0.18	1.031	0.949	1.11	0.882	20.6	20	19.5	22.2	18.97	14.3	13.89	21.19	High	High	High	High	High	High	High	High	High	High	High	High	High	High	High	High	H3BIX4 [118-126]		2.79	100	1	19.5	18.2	21.7
FALSE	High	[R].EQSSDDFCR.[M]	P98200	Phospholipid-transporting ATPase IB OS=Mus musculus GN=Atp8a2 PE=1 SV=1		0.994877	0.908841	0.193228	0.353634	0.1	-0.02	0.44	-0.35	1.075	0.987	1.357	0.782	16.4	15.3	16.2	20.7	20.31	21.42	22.2	14.75	High	High	High	High	High	High	High	High	High	High	High	High	High	High	High	High	P98200 [419-427]	P98200 2xPhospho [S421(100); S422(100)]	1.99	100	1	19.6	15.1	17.9
FALSE	High	[K].RPPESPPIVEEWNSR.[A]	Q9CQY2	RNMT-activating mini protein OS=Mus musculus GN=Fam103a1 PE=3 SV=1		0.540192	0.920658	0.761115	0.354105	-0.09	0	0.12	-0.2	0.94	1.003	1.084	0.87	37.3	39.7	37.4	43	13.44	8.95	8.87	2.83	High	High	High	High	High	High	High	High	High	High	High	High	High	High	High	High	Q9CQY2 [32-46]	Q9CQY2 1xPhospho [S36(100)]	1.97	100	1	42.4	30.9	39.3
FALSE	High	[K].EEQAASPVAEDVGDVGVSSDDEKRAQAAR.[GI]	Q99PI5	Phosphatidate phosphatase LPIN2 OS=Mus musculus GN=Lpin2 PE=1 SV=2		0.991641	0.837734	0.928066	0.354362	0.15	0.11	-0.02	0.28	1.111	1.078	0.988	1.212	14	12.6	15.1	12.4	14.24	19.16	15.56	22.64	High	High	High	High	High	High	High	High	High	High	High	High	High	High	High	High	Q99PI5 [169-197]	Q99PI5 2xPhospho [S186(100); S187(100)]	3.94	100	1	14.6	13.5	15.3
FALSE	High	[K].QTPPASPSPQPIEDRPPSSPIYEDAAPFK.[A]	Q60598	Src substrate cortactin OS=Mus musculus GN=Cttn PE=1 SV=2		0.935638	0.203121	0.997481	0.354892	0.11	-0.22	0.05	-0.16	1.081	0.857	1.037	0.893	27.9	25.8	23.9	26.8	14.44	13.36	21.01	4.96	High	High	High	High	High	High	High	High	High	High	High	High	High	High	High	High	Q60598 [400-428]	Q60598 2xPhospho [T401(100); S/Y]	5.78	100	1	32.5	29.3	26.5
FALSE	High	[R].VPSSDEEVVEEPQSR.[R]	P58871	182 kDa tankyrase-1-binding protein OS=Mus musculus GN=Tnks1bp1 PE=1 SV=2		0.476329	0.968991	0.996614	0.355178	-0.24	0.01	-0.03	-0.2	0.846	1.004	0.979	0.868	24.7	29.2	24.8	28.5	9.49	21.08	4.25	10.61	High	High	High	High	High	High	High	High	High	High	High	High	High	High	High	High	P58871 [1609-1623]	P58871 2xPhospho [S1611(100); S1612(100)]	4.6	100	1	29	25.2	24.2
FALSE	High	[K].KDKEETEGNESSEATSPVNAIYSLA.[-]	A0A087WPX3	Neurofascin OS=Mus musculus GN=Nfasc PE=1 SV=1		0.260105	0.660915	0.109191	0.355688	-0.2	0.16	-0.27	0.23	0.868	1.118	0.827	1.172	58.8	67.8	65.7	56.1	9.74	11.85	6.75	12.78	High	High	High	High	High	High	High	High	High	High	High	High	High	High	High	High	A0A087WPX3 [1323-1347]	A0A087WPX3 3xPhospho [S1333(100); S1334(100); T/S/Y]	4.25	100	1	62.3	55.5	66.1
FALSE	High	[R].AEEQLPPLLSPPSPSTPHSR.[RY]	P97434	Myosin phosphatase Rho-interacting protein OS=Mus musculus GN=Mprip PE=1 SV=2		0.303109	0.997645	0.999895	0.355884	0.3	-0.04	-0.04	0.3	1.235	0.971	0.972	1.233	22.2	18	21.5	17.5	7.91	11.28	28.46	8.95	High	High	High	High	High	High	High	High	High	High	High	High	High	High	High	High	P97434 [280-299]	P97434 2xPhospho [S289(100); S292(98.2)]	3.05	100	1	20.7	21	24.3
FALSE	High	[R].SLDDLSAPPHHR.[S]	E9Q6B2	Coiled-coil domain-containing protein 85C OS=Mus musculus GN=Ccdc85c PE=1 SV=1		0.370744	0.254578	0.266211	0.35606	0.2	0.3	0.17	0.33	1.147	1.228	1.124	1.254	8.3	7.2	10.2	8.1	7.37	24.22	18.16	12.4	High	High	High	High	High	High	High	High	High	High	High	High	High	High	High	High	E9Q6B2 [247-258]	E9Q6B2 1xPhospho [S247(100)]	1.32	100	1	8.8	7.6	8.7
FALSE	High	[R].FSWGGR.[D]	F6RWW8	Myelin basic protein (Fragment) OS=Mus musculus GN=Mbp PE=1 SV=1		0.855121	0.9988	0.13694	0.35624	-0.6	-0.08	-1.15	0.48	0.662	0.949	0.45	1.395	55.8	84.3	52.9	37.9	36.1	43.91	40.68	11.02	High	High	High	High	High	High	High	High	High	High	High	High	High	High	High	High	F6RWW8 [134-139]	F6RWW8 1xPhospho [S135(100)]	1.42	100	1	87.3	48.3	64.5
FALSE	High	[R].QQSLGGSESPGPVPR.[S]	F8WHJ1	FTS and Hook-interacting protein OS=Mus musculus GN=Fam160a2 PE=1 SV=1		0.112231	0.53179	0.0639582	0.356244	-0.47	0.29	-0.57	0.38	0.721	1.222	0.675	1.304	10.2	14.1	12.4	9.5	15.32	19.31	14.19	9.14	High	High	High	High	High	High	High	High	High	High	High	High	High	High	High	High	F8WHJ1 [508-522]	F8WHJ1 1xPhospho [S510(100)]	5.18	100	1	11.9	8.4	11
FALSE	High	[R].GSSAAAPPSSPPPGR.[A]	Q8QZV4	Serine/threonine-protein kinase 32C OS=Mus musculus GN=Stk32c PE=1 SV=1		0.990973	0.971551	0.75533	0.356389	-0.07	-0.02	0.08	-0.17	0.954	0.983	1.056	0.887	30.7	32.2	30.2	34	17.59	4.32	4.63	11.88	High	High	High	High	High	High	High	High	High	High	High	High	High	High	High	High	Q8QZV4 [9-23]	Q8QZV4 1xPhospho [S18(100)]	4.7	100	1	26.1	29.4	32
FALSE	High	[R].NSSTGPTPDCSPPSPDTALK.[N]	Q8BIZ1	Ankyrin repeat and sterile alpha motif domain-containing protein 1B OS=Mus musculus GN=Anks1b PE=1 SV=3		0.99743	0.603343	0.914707	0.357443	0.01	-0.18	0.06	-0.23	1.007	0.885	1.044	0.854	44.6	44.3	39.5	46.3	13.51	4.65	17.14	12.59	High	High	High	High	High	High	High	High	High	High	High	High	High	High	High	High	Q8BIZ1 [497-516]	Q8BIZ1 2xPhospho [S507(100); S510(100)]	3.74	100	1	43.9	39.8	45.3
FALSE	High	[R].LEQGQAIDDLMPAQK.[-]	Q04447	Creatine kinase B-type OS=Mus musculus GN=Ckb PE=1 SV=1		0.91138	0.926845	0.336746	0.35776	0.15	-0.11	0.28	-0.24	1.108	0.928	1.217	0.844	15.9	14.3	14.7	17.4	9.61	26.18	12.82	13.99	High	High	High	High	High	High	High	High	High	High	High	High	High	High	High	High	Q04447 [367-381]		4.73	100	1	13.4	16.2	15.5
FALSE	High	[R].NVDNAEGSDTDY.[-]	E9PZP8	Protein Herc1 OS=Mus musculus GN=Herc1 PE=1 SV=1		0.495368	0.999788	0.99764	0.357911	0.14	0.06	0.02	0.17	1.099	1.039	1.014	1.127	62.5	56.8	64.9	57.6	3.68	6.49	8.56	9.99	High	High	High	High	High	High	High	High	High	High	High	High	High	High	High	High	E9PZP8 [4848-4859]	E9PZP8 1xPhospho [S4855(100)]	3.22	100	1	62.5	66.3	62.4
FALSE	High	[R].QPSLDVDVGDPNPDVVSFR.[A]	Q01065	Calcium/calmodulin-dependent 3',5'-cyclic nucleotide phosphodiesterase 1B OS=Mus musculus GN=Pde1b PE=1 SV=2		0.882638	0.597325	0.652246	0.358192	-0.2	0.24	-0.17	0.21	0.873	1.183	0.891	1.159	89.4	102.4	105.8	91.3	13.55	8.81	8.34	6.64	High	High	High	High	High	High	High	High	High	High	High	High	High	High	High	High	Q01065 [463-481]	Q01065 1xPhospho [S465(100)]	5.98	100	1	90.7	88.1	86.3
FALSE	High	[R].SDVETATDSDTESR.[G]	Q8BJ42	Disks large-associated protein 2 OS=Mus musculus GN=Dlgap2 PE=1 SV=2		0.962267	0.998154	0.233296	0.358979	-0.06	0.02	-0.15	0.11	0.961	1.015	0.901	1.082	93.8	97.6	95.2	88	8.33	1.49	8.36	7.15	High	High	High	High	High	High	High	High	High	High	High	High	High	High	High	High	Q8BJ42 [737-750]	Q8BJ42 2xPhospho [T743(100); S745(100)]	5.8	100	1	104.7	98.8	89.1
FALSE	High	[R].RLSQSSLESATSPSCS.[-]	Q80U57	Regulating synaptic membrane exocytosis protein 3 OS=Mus musculus GN=Rims3 PE=1 SV=2		0.999642	0.983124	0.494618	0.359193	0	-0.02	0.18	-0.2	0.999	0.983	1.13	0.87	40.7	40.7	40	46	9.4	6.7	11.67	7.38	High	High	High	High	High	High	High	High	High	High	High	High	High	High	High	High	Q80U57 [292-307]	Q80U57 2xPhospho [S294(100); S296(100)]	5.11	100	1	47.7	39.3	42.2
FALSE	High	[K].SRSISPCPK.[V]	Q8BTI8	Serine/arginine repetitive matrix protein 2 OS=Mus musculus GN=Srrm2 PE=1 SV=3		0.649675	0.240769	0.809162	0.35938	0.19	-0.32	0.25	-0.38	1.141	0.798	1.186	0.768	35.3	30.9	28.2	36.6	9.82	14.83	14.07	15.58	High	High	High	High	High	High	High	High	High	High	High	High	High	High	High	High	Q8BTI8 [924-932]	Q8BTI8 2xPhospho [S926(100); S928(100)]	3.18	100	1	39.7	36.6	31.6
FALSE	High	[R].WWQQEEQLGPEESREEVRFPDR.[Q]	P16014	Secretogranin-1 OS=Mus musculus GN=Chgb PE=1 SV=2		0.85895	0.881448	0.335607	0.359778	-0.06	0.03	-0.18	0.15	0.958	1.024	0.882	1.113	29	30.3	29.7	26.7	6.57	5.96	7.2	14.1	High	High	High	High	High	High	High	High	High	High	High	High	High	High	High	High	P16014 [481-502]	P16014 1xPhospho [S493(100)]	3.5	100	1	29.3	25.6	29.7
FALSE	High	[R].QHYQKETESAPGSPR.[A]	Z4YJT3	La-related protein 1 OS=Mus musculus GN=Larp1 PE=1 SV=1		0.522022	0.999886	0.980836	0.359854	0.51	0.24	-0.08	0.83	1.421	1.184	0.945	1.78	27.6	19.5	32.7	18.4	22.05	39.56	34.75	10.59	High	High	High	High	High	High	High	High	High	High	High	High	High	High	High	High	Z4YJT3 [486-500]	Z4YJT3 2xPhospho [S494(99.6); S498(100)]	5.66	100	1	32	23.9	33.7
FALSE	High	[R].GSRSLPDSGR.[T]	B1AS06	Disks large-associated protein 3 OS=Mus musculus GN=Dlgap3 PE=1 SV=1		0.999378	0.979186	0.500475	0.36064	0.01	0.02	-0.43	0.47	1.009	1.016	0.742	1.383	21	20.8	21.4	15.5	32.34	9.05	10.94	35.45	High	High	High	High	High	High	High	High	High	High	High	High	High	High	High	High	B1AS06 [776-785]	B1AS06 1xPhospho [S779(100)]	1.97	100	1	13	18	28.3
FALSE	High	[R].RSISSDSSSSK.[K]	Q8BWS5	G protein-regulated inducer of neurite outgrowth 3 OS=Mus musculus GN=Gprin3 PE=1 SV=1		0.934961	0.633464	0.704579	0.36073	-0.16	0.23	-0.21	0.28	0.894	1.176	0.865	1.215	42.4	47.4	49.8	41	12.06	22.72	9.73	11.68	High	High	High	High	High	High	High	High	High	High	High	High	High	High	High	High	Q8BWS5 [720-730]	Q8BWS5 3xPhospho [S721(99.3); S724(99.3); S727(98.6)]	1.56	100	1	47.5	39.9	45
FALSE	High	[R].VDSTTCLFPVEEK.[A]	P47856	Glutamine--fructose-6-phosphate aminotransferase [isomerizing] 1 OS=Mus musculus GN=Gfpt1 PE=1 SV=3		0.99948	0.958721	0.566204	0.361651	0.33	0.07	-0.47	0.87	1.259	1.048	0.722	1.828	19.5	15.5	20.5	11.2	37.88	33.5	32.2	12.03	High	High	High	High	High	High	High	High	High	High	High	High	High	High	High	High	P47856 [257-269]	P47856 1xPhospho [S259(99.8)]	3.87	100	1	20.9	18.2	21.1
FALSE	High	[R].GSGVAQSPQQQPQQQPPQPQQPTPPK.[L]	Q8K212	Phosphofurin acidic cluster sorting protein 1 OS=Mus musculus GN=Pacs1 PE=1 SV=2		0.934224	0.459161	0.863073	0.362478	-0.23	0.48	-0.12	0.38	0.854	1.398	0.918	1.3	21	24.6	29.4	22.6	23.7	24.13	17.74	32.4	High	High	High	High	High	High	High	High	High	High	High	High	High	High	High	High	Q8K212 [22-47]	Q8K212 1xPhospho [S28(100)]	2.35	100	1	15.5	20.3	21.7
FALSE	High	[K].AAQSPQQHSSGDPTEEESPV.[-]	P53986	Monocarboxylate transporter 1 OS=Mus musculus GN=Slc16a1 PE=1 SV=1		0.986439	0.382887	0.0138873	0.36324	0.09	0.16	0.43	-0.18	1.063	1.116	1.344	0.882	51	48	56.9	64.5	6.87	9.53	12.75	15.49	High	High	High	High	High	High	High	High	High	High	High	High	High	High	High	High	P53986 [474-493]	P53986 3xPhospho [S482(100); S483(100); S491(100)]	6.21	100	1	51	53.1	45.1
FALSE	High	[R].TAFPSKLETTPTTSPLPERK.[D]	A0A0G2JDT9	Leucine-rich repeat-containing protein 7 OS=Mus musculus GN=Lrrc7 PE=1 SV=1		0.275211	0.09927	0.726549	0.363887	0.5	-0.76	0.24	-0.5	1.416	0.59	1.183	0.706	10.9	7.7	6.5	9.1	24.03	30.83	22.42	14.6	High	High	High	High	High	High	High	High	High	High	High	High	High	High	High	High	A0A0G2JDT9 [861-880]	A0A0G2JDT9 2xPhospho [T870(100); T/S]	3.61	100	1	7.5	10.9	11
FALSE	High	[K].GSTESCNTTTEDEDLK.[V]	Q923T9	Calcium/calmodulin-dependent protein kinase type II subunit gamma OS=Mus musculus GN=Camk2g PE=1 SV=1		0.891104	0.850622	0.412092	0.365285	-0.13	0.22	-0.46	0.54	0.912	1.161	0.727	1.457	7.8	8.6	9.1	6.2	36.29	15.66	21.72	29.15	High	High	High	High	High	High	High	High	High	High	High	High	High	High	High	High	Q923T9 [380-395]	Q923T9 1xPhospho [T387(100)]	1.35	100	1	8.3	7.3	12.4
FALSE	High	[K].WKQDPSEDEQEQGTSAESEAEQK.[K]	E9PZM4	Chromodomain-helicase-DNA-binding protein 2 OS=Mus musculus GN=Chd2 PE=1 SV=1		0.980257	0.997119	0.458547	0.365378	0.03	-0.2	0.36	-0.52	1.021	0.873	1.28	0.697	20.4	20	17.8	25.5	31.4	21.49	34.79	22.66	High	High	High	High	High	High	High	High	High	High	High	High	High	High	High	High	E9PZM4 [151-173]	E9PZM4 2xPhospho [S156(100); S165(97.6)]	3.93	100	1	10.9	18.6	22.3
FALSE	High	[R].AQQVAEQQSQQEQGGTPPAPHSPFR.[R]	A0A140LHW2	Rho GTPase-activating protein 33 OS=Mus musculus GN=Arhgap33 PE=1 SV=1		0.604331	0.139446	0.929786	0.36569	0.31	-0.62	0.01	-0.32	1.236	0.65	1.005	0.799	13.7	11.1	8.9	11.1	22.81	20.02	10.43	15.73	High	High	High	High	High	High	High	High	High	High	High	High	High	High	High	High	A0A140LHW2 [904-928]	A0A140LHW2 1xPhospho [T919(100)]	3.92	100	1	13.5	8.6	15.2
FALSE	High	[R].TGSQGQCTQVR.[V]	J3QNN8	MCG49140 OS=Mus musculus GN=Gm10263 PE=3 SV=1		0.890759	0.821527	0.444797	0.366397	-0.1	0.17	-0.06	0.12	0.931	1.121	0.96	1.087	19.5	20.9	21.8	20.1	9.37	7.92	7.12	23.63	High	High	High	High	High	High	High	High	High	High	High	High	High	High	High	High	J3QNN8 [21-31]	J3QNN8 1xPhospho [S23(99.7)]	1.87	100	1	17.8	20.2	22
FALSE	High	[K].RPWPQHQCSAPADLGYEGRVDSFTDR.[T]	Q80TL0	Protein phosphatase 1E OS=Mus musculus GN=Ppm1e PE=1 SV=2		0.970753	0.977336	0.384943	0.366824	0.12	-0.14	-0.17	0.16	1.089	0.908	0.886	1.116	60.2	55.2	54.6	49	10.55	16.64	14.76	10.2	High	High	High	High	High	High	High	High	High	High	High	High	High	High	High	High	Q80TL0 [524-549]	Q80TL0 2xPhospho [S532(100); S545(98.8)]	2.95	100	1	57.7	62.8	63
FALSE	High	[R].RHYTRSRSR.[S]	P62996	Transformer-2 protein homolog beta OS=Mus musculus GN=Tra2b PE=1 SV=1		0.994629	0.991248	0.346315	0.366907	-0.21	0.09	0.74	-0.86	0.864	1.067	1.671	0.552	14.3	16.5	15.2	27.6	39.01	47.72	58.36	25.36	High	High	High	High	High	High	High	High	High	High	High	High	High	High	High	High	P62996 [66-74]	P62996 3xPhospho [S73(99.7); Y/T/S]	1.5	100	1	16.3	12.5	11.8
FALSE	High	[R].STRKSICGPHDQDR.[K]	P21447	Multidrug resistance protein 1A OS=Mus musculus GN=Abcb1a PE=1 SV=3		0.683072	0.967358	0.999371	0.366971	0.15	0.18	0.11	0.22	1.11	1.132	1.078	1.166	13	11.7	14.7	12.6	22.08	20.42	12.29	36.77	High	High	High	High	High	High	High	High	High	High	High	High	High	High	High	High	P21447 [663-676]	P21447 2xPhospho [S663(99); S667(99)]	2.14	100	1	12.2	12.9	13.1
FALSE	High	[K].RENPPVEDSSDEDDKRNPGNLYDK.[A]	A0A0R4J0D3	Dolichyl-diphosphooligosaccharide--protein glycosyltransferase subunit STT3B OS=Mus musculus GN=Stt3b PE=1 SV=1		0.427809	0.99983	0.999969	0.368076	-0.18	-0.05	0.03	-0.26	0.884	0.963	1.02	0.835	39.3	44.4	37.8	45.3	10.5	7.4	17.59	8.67	High	High	High	High	High	High	High	High	High	High	High	High	High	High	High	High	A0A0R4J0D3 [487-510]	A0A0R4J0D3 2xPhospho [S495(100); S496(100)]	3.62	100	1	35.5	39.2	45.6
FALSE	High	[R].LDHALSSPSSPCEEIK.[N]	Q8BGT8	Phytanoyl-CoA hydroxylase-interacting protein-like OS=Mus musculus GN=Phyhipl PE=1 SV=1		0.978867	0.818629	0.63243	0.368757	0.05	0.04	-0.2	0.28	1.032	1.027	0.871	1.216	16.5	16	16.9	13.9	19.2	17.3	3	4.83	High	High	High	High	High	High	High	High	High	High	High	High	High	High	High	High	Q8BGT8 [6-21]	Q8BGT8 2xPhospho [S11(99.4); S12(99.4)]	3.84	100	1	16.5	18	16.4
FALSE	High	[R].ELVGDTGSQEGDNEQPSGSETEEDPSASPQK.[I]	E9Q942	Small integral membrane protein 13 OS=Mus musculus GN=Smim13 PE=1 SV=1		0.357113	0.162358	0.667852	0.368873	-0.09	0.17	-0.07	0.14	0.939	1.124	0.955	1.105	202.6	215.7	227.8	206.1	8.18	8.35	5.25	5.63	High	High	High	High	High	High	High	High	High	High	High	High	High	High	High	High	E9Q942 [43-73]		6.47	100	1	186.4	191.6	214.1
FALSE	High	[K].NSQEDSEDSEEKDVK.[T]	A0A087WRY3	Nuclear ubiquitous casein and cyclin-dependent kinase substrate 1 OS=Mus musculus GN=Nucks1 PE=1 SV=1		0.665184	0.995726	0.98889	0.369092	-0.04	0	0.03	-0.07	0.97	0.999	1.02	0.95	305.2	314.7	304.8	320.9	5.06	6.69	8.25	6.7	High	High	High	High	High	High	High	High	High	High	High	High	High	High	High	High	A0A087WRY3 [53-67]	A0A087WRY3 2xPhospho [S58(100); S61(100)]	3.45	100	1	277.8	305.2	312.1
FALSE	High	[R].NKPSVLEDSSFEGAEGDRPEVTESINPGDR.[L]	G5E8Q0	Lysosomal trafficking regulator, isoform CRA_a OS=Mus musculus GN=Lyst PE=1 SV=1		0.543307	0.477697	0.315988	0.369097	0.2	-0.23	-0.33	0.29	1.147	0.852	0.798	1.224	29.4	25.6	25	20.4	4.9	25.44	17.62	11.83	High	High	High	High	High	High	High	High	High	High	High	High	High	High	High	High	G5E8Q0 [1494-1523]	G5E8Q0 2xPhospho [S1502(100); S1503(100)]	4.64	100	1	30.1	31.3	28.6
FALSE	High	[K].QICLVMLETLSQSPQGR.[V]	P60335	Poly(rC)-binding protein 1 OS=Mus musculus GN=Pcbp1 PE=1 SV=1		0.857486	0.997251	0.892287	0.369099	-0.02	-0.1	0.04	-0.15	0.989	0.936	1.027	0.901	23.9	24.2	22.4	24.8	11.37	15.46	4.41	20.77	High	High	High	High	High	High	High	High	High	High	High	High	High	High	High	High	P60335 [161-177]	P60335 1xPhospho [S173(100)]	4.67	100	1	24.1	23.7	24.8
FALSE	High	[R].AWALFPPSDDYDDTDDDDPFNPQESKR.[F]	A0A0U1RPU8	Protein tweety homolog OS=Mus musculus GN=Ttyh1 PE=1 SV=1		0.398958	0.425316	0.345009	0.369209	-0.1	0.2	-0.11	0.21	0.934	1.148	0.925	1.159	63.7	68.2	73.2	63.1	11.48	17.08	11.6	9.82	High	High	High	High	High	High	High	High	High	High	High	High	High	High	High	High	A0A0U1RPU8 [320-346]	A0A0U1RPU8 1xPhospho [S344(100)]	4.26	100	1	59	56.4	68.7
FALSE	High	[R].HASSSPESLKPTPAPGSR.[R]	Q8BTI8	Serine/arginine repetitive matrix protein 2 OS=Mus musculus GN=Srrm2 PE=1 SV=3		0.665941	0.977469	0.786523	0.370309	-0.25	0.12	0.1	-0.23	0.841	1.087	1.073	0.852	48.4	57.6	52.6	61.8	10.13	24.08	12.71	20.29	High	High	High	High	High	High	High	High	High	High	High	High	High	High	High	High	Q8BTI8 [431-448]	Q8BTI8 3xPhospho [S433(100); S434(100); S435(100)]	5.48	100	1	46	50.9	45.1
FALSE	High	[R].APSPAPAVSPK.[R]	Q5U4C3	Splicing factor, arginine/serine-rich 19 OS=Mus musculus GN=Scaf1 PE=1 SV=1		0.527863	0.732517	0.2263	0.370862	0.34	-0.41	0.56	-0.63	1.265	0.754	1.478	0.645	10.4	8.2	7.8	12.1	15.81	30.18	34.74	33.41	High	High	High	High	High	High	High	High	High	High	High	High	High	High	High	High	Q5U4C3 [674-684]	Q5U4C3 2xPhospho [S676(100); S682(100)]	4.14	100	1	11.5	11.8	8.5
FALSE	High	[R].RSEAEEGEVRTPTK.[I]	E9PV14; A2AUK5	Band 4.1-like protein 1 (Fragment) OS=Mus musculus GN=Epb41l1 PE=1 SV=1 Band 4.1-like protein 1 OS=Mus musculus GN=Epb41l1 PE=1 SV=1	Shared	0.728839	0.931242	0.616702	0.37329	-0.07	0.08	0.4	-0.39	0.955	1.056	1.317	0.765	24.9	26.1	26.3	34.3	12.65	27.37	17.81	15.84	High	High	High	High	High	High	High	High	High	High	High	High	High	High	High	High	E9PV14 [464-477]; A2AUK5 [465-478]	E9PV14 1xPhospho [T474(100)]; A2AUK5 1xPhospho [T475(100)]	1.77	100	2	21.8	27.2	22.8
FALSE	High	[K].SETSSNPSSPEICPNK.[E]	Q5SVL6	Rap1 GTPase-activating protein 2 OS=Mus musculus GN=Rap1gap2 PE=1 SV=1		0.922154	0.973696	0.918485	0.373892	0.06	-0.16	0.12	-0.23	1.042	0.893	1.09	0.854	43.4	41.6	38.7	45.4	18.58	15.53	9.28	1.43	High	High	High	High	High	High	High	High	High	High	High	High	High	High	High	High	Q5SVL6 [586-601]	Q5SVL6 3xPhospho [S590(99.3); S593(100); S594(100)]	4.29	100	1	43.3	46.4	43.5
FALSE	High	[K].ESESDQEPEEEIGMTSEK.[N]	Q8C8R3; S4R1M4	Ankyrin-2 OS=Mus musculus GN=Ank2 PE=1 SV=2 Ankyrin-2 (Fragment) OS=Mus musculus GN=Ank2 PE=1 SV=1	Shared	0.992612	0.998531	0.607539	0.373893	0.02	0.03	-0.02	0.07	1.012	1.023	0.988	1.048	109.5	108.2	112	106.8	9.15	6.53	6.09	8.8	High	High	High	High	High	High	High	High	High	High	High	High	High	High	High	High	Q8C8R3 [1425-1442]; S4R1M4 [111-128]	Q8C8R3 1xPhospho [S1428(100)]; S4R1M4 1xPhospho [S114(100)]	5.37	100	2	127.8	113.1	105.6
FALSE	High	[R].TEADSTSEGPEDEAQR.[G]	E9QLA5	Inverted formin-2 OS=Mus musculus GN=Inf2 PE=1 SV=1		0.902366	0.145406	0.999987	0.373917	0.07	-0.39	-0.06	-0.27	1.046	0.761	0.958	0.831	48.7	46.6	37.1	44.6	14.41	17.23	10.49	15.28	High	High	High	High	High	High	High	High	High	High	High	High	High	High	High	High	E9QLA5 [1166-1181]	E9QLA5 2xPhospho [S1172(99.7); S/T]	3.89	100	1	52.1	54.5	45.6
FALSE	High	[K].YKDIIRQPSEEEIIK.[L]	Q62048	Astrocytic phosphoprotein PEA-15 OS=Mus musculus GN=Pea15 PE=1 SV=1		0.657151	0.135991	0.962895	0.374517	-0.23	0.35	-0.06	0.18	0.853	1.271	0.956	1.134	43.2	50.6	54.9	48.4	15.55	12.09	12.81	8.24	High	High	High	High	High	High	High	High	High	High	High	High	High	High	High	High	Q62048 [108-122]	Q62048 1xPhospho [S116(100)]	2.81	100	1	44.9	40.4	41.5
FALSE	High	[R].KETESEAEDDNLDDLER.[H]	E9PUK6	Serine/arginine repetitive matrix protein 1 OS=Mus musculus GN=Srrm1 PE=1 SV=1		0.992067	0.875926	0.632296	0.375001	-0.06	0.15	-0.13	0.22	0.961	1.112	0.916	1.166	93.9	97.7	104.4	89.5	9.02	5.15	15.9	5.19	High	High	High	High	High	High	High	High	High	High	High	High	High	High	High	High	E9PUK6 [888-904]	E9PUK6 2xPhospho [T890(100); S892(100)]	7.01	100	1	95.3	92.6	109.3
FALSE	High	[K].AMGDEESGDSDGSPKTSPK.[A]	B1AS06	Disks large-associated protein 3 OS=Mus musculus GN=Dlgap3 PE=1 SV=1		0.99663	0.0307673	0.329753	0.375293	0.15	0.35	0.33	0.17	1.106	1.272	1.253	1.123	21.5	19.4	27.3	24.3	8.48	15.3	18.04	5.37	High	High	High	High	High	High	High	High	High	High	High	High	High	High	High	High	B1AS06 [398-416]	B1AS06 2xPhospho [S410(99.7); T/S]	5.31	100	1	21.6	18.3	21.4
FALSE	High	[R].SFGSGTELGHWVTTPPDIPGSR.[N]	Q9CQS4	Solute carrier family 25 member 46 OS=Mus musculus GN=Slc25a46 PE=1 SV=1		0.966285	0.994226	0.769632	0.375692	0.18	0.01	0.05	0.14	1.137	1.006	1.035	1.105	16.8	14.8	16.9	15.3	11.32	25.86	8.67	40.12	High	High	High	High	High	High	High	High	High	High	High	High	High	High	High	High	Q9CQS4 [32-53]	Q9CQS4 2xPhospho [S32(98.4); T/S]	2.81	100	1	18.1	15.7	17.9
FALSE	High	[R].IAFDAESEPNNSSGSMEK.[R]	Q8BPU7	Engulfment and cell motility protein 1 OS=Mus musculus GN=Elmo1 PE=1 SV=2		0.996139	0.995147	0.624618	0.376236	-0.08	0	-0.27	0.19	0.949	0.999	0.829	1.143	18.6	19.6	18.6	16.3	14.92	19.89	4.95	10.5	High	High	High	High	High	High	High	High	High	High	High	High	High	High	High	High	Q8BPU7 [330-347]	Q8BPU7 1xPhospho [S344(100)]	3.84	100	1	21.7	17.6	19.7
FALSE	High	[K].EENQTGPTTTPSDTQDLDMK.[K]	Q9Z0P4	Paralemmin-1 OS=Mus musculus GN=Palm PE=1 SV=1		0.791118	0.685058	0.981765	0.376785	-0.09	-0.28	-0.09	-0.27	0.939	0.826	0.936	0.829	16.7	17.7	13.8	16.6	35.66	17.83	19.07	27.19	High	High	High	High	High	High	High	High	High	High	High	High	High	High	High	High	Q9Z0P4 [354-373]	Q9Z0P4 2xPhospho [S365(100); T]	3.87	100	1	22.8	20.9	13.3
FALSE	High	[K].AEEEGGSEEEGSDRSPQESK.[K]	P08553	Neurofilament medium polypeptide OS=Mus musculus GN=Nefm PE=1 SV=4		0.922528	0.459455	0.859775	0.376812	0.15	-0.27	0.16	-0.28	1.107	0.83	1.119	0.821	24.6	22.2	20.4	24.9	7.09	19.36	18.22	14.42	High	High	High	High	High	High	High	High	High	High	High	High	High	High	High	High	P08553 [709-728]	P08553 2xPhospho [S715(100); S]	5.72	100	1	26.8	23.2	25.8
FALSE	High	[R].TTSKPLISVTAQSSTESTQDAYQDSR.[A]	Q8BJ42	Disks large-associated protein 2 OS=Mus musculus GN=Dlgap2 PE=1 SV=2		0.867877	0.999995	0.788646	0.377245	0.14	-0.07	-0.24	0.31	1.101	0.953	0.849	1.236	16.1	14.6	15.3	12.4	16.47	38.01	11.4	19.06	High	High	High	High	High	High	High	High	High	High	High	High	High	High	High	High	Q8BJ42 [624-649]	Q8BJ42 2xPhospho [S636(100); S/T/Y]	5.77	100	1	15.9	16.3	19.5
FALSE	High	[R].EHLRSRSPSPESR.[S]	Q9Z0U1	Tight junction protein ZO-2 OS=Mus musculus GN=Tjp2 PE=1 SV=2		0.819272	0.957445	0.225447	0.3775	-0.07	0.12	-0.17	0.22	0.953	1.09	0.89	1.168	21.3	22.3	23.2	19.9	15.86	30.31	7.63	12.05	High	High	High	High	High	High	High	High	High	High	High	High	High	High	High	High	Q9Z0U1 [259-271]	Q9Z0U1 3xPhospho [S263(100); S265(100); S267(100)]	2.35	100	1	22	27.8	19.9
FALSE	High	[K].EQAGEEEKEDAVRKSASEDSIR.[K]	B1AWN6	Sodium channel protein OS=Mus musculus GN=Scn2a PE=1 SV=1		0.754208	0.848189	0.473588	0.37776	-0.29	0.2	0.44	-0.54	0.815	1.147	1.356	0.69	73.3	89.9	84.1	121.8	34.77	29.54	21.92	10.98	High	High	High	High	High	High	High	High	High	High	High	High	High	High	High	High	B1AWN6 [512-533]	B1AWN6 2xPhospho [S526(100); S528(100)]	5.19	100	1	59.7	82.2	65.3
FALSE	High	[KR].AASPSPQSVR.[R]	E9PUK6	Serine/arginine repetitive matrix protein 1 OS=Mus musculus GN=Srrm1 PE=1 SV=1		0.999864	0.99871	0.280465	0.378074	0.02	-0.12	-0.44	0.34	1.012	0.922	0.737	1.266	17.9	17.7	16.5	13	15.56	6.23	23.25	57.93	High	High	High	High	High	High	High	High	High	High	High	High	High	High	High	High	E9PUK6 [754-763]	E9PUK6 3xPhospho [S756(100); S758(100); S761(100)]	1.7	100	1	18.6	17.2	20
FALSE	High	[K].AEEEGGSEEEGSDRSPQESK.[K]	P08553	Neurofilament medium polypeptide OS=Mus musculus GN=Nefm PE=1 SV=4		0.98321	0.623988	0.999749	0.378665	-0.18	-0.24	-0.04	-0.38	0.882	0.85	0.976	0.768	41.7	47.2	35.4	46.1	35.02	27.69	22.19	11.99	High	High	High	High	High	High	High	High	High	High	High	High	High	High	High	High	P08553 [709-728]	P08553 3xPhospho [S715(100); S720(100); S723(100)]	7.18	100	1	46.1	65.3	37.6
FALSE	High	[R].RFSSGGEEEDFDR.[S]	Q69ZX8	Actin-binding LIM protein 3 OS=Mus musculus GN=Ablim3 PE=1 SV=2		0.976196	0.276808	0.997994	0.378701	0.02	-0.18	0	-0.16	1.012	0.883	0.997	0.897	53.6	52.9	47.3	52.7	9.57	6.28	6.3	14.88	High	High	High	High	High	High	High	High	High	High	High	High	High	High	High	High	Q69ZX8 [500-512]	Q69ZX8 1xPhospho [S502(100)]	3.13	100	1	60.6	56.1	51.2
FALSE	High	[K].SSPATTVTSPNSTPAK.[T]	Q61548	Clathrin coat assembly protein AP180 OS=Mus musculus GN=Snap91 PE=1 SV=1		0.736417	0.924105	0.213782	0.379042	0.04	0.04	0.2	-0.12	1.029	1.029	1.147	0.923	132.9	129.2	136.8	148.2	13.43	6.1	4.92	9.25	High	High	High	High	High	High	High	High	High	High	High	High	High	High	High	High	Q61548 [305-320]	Q61548 2xPhospho [S306(99.5); T309(99.5)]	3.98	100	1	126.8	133.7	132.2
FALSE	High	[K].ACSLAK.[T]	Q9CQV8; P63101	14-3-3 protein beta/alpha OS=Mus musculus GN=Ywhab PE=1 SV=3 14-3-3 protein zeta/delta OS=Mus musculus GN=Ywhaz PE=1 SV=1	Shared	0.963048	0.469171	0.913939	0.37987	-0.02	-0.24	0.03	-0.29	0.986	0.846	1.018	0.819	27.2	27.6	23	28.1	25.25	16.69	22.42	15.23	High	High	High	High	High	High	High	High	High	High	High	High	High	High	High	High	Q9CQV8 [190-195]; P63101 [188-193]		1.72	100	2	23.4	26	28.4
FALSE	High	[K].LDSPSR.[S]	Q80X80	C2 domain-containing protein 2-like OS=Mus musculus GN=C2cd2l PE=1 SV=3		0.98123	0.998677	0.281802	0.380174	0.29	-0.25	0.39	-0.35	1.222	0.841	1.313	0.783	29.9	24.5	25.2	32.2	38.11	15.65	5.59	29.15	High	High	High	High	High	High	High	High	High	High	High	High	High	High	High	High	Q80X80 [462-467]	Q80X80 1xPhospho [S464(99.7)]	1.69	100	1	35.5	36.8	25.2
FALSE	High	[R].SGSFQGAVR.[R]	A2ALL9	Calcium-transporting ATPase OS=Mus musculus GN=Atp2b3 PE=1 SV=1		0.999894	0.983775	0.610908	0.380425	-0.01	-0.02	-0.11	0.08	0.995	0.988	0.927	1.06	121.1	121.7	119.7	112.9	2.13	7.66	7.04	11.31	High	High	High	High	High	High	High	High	High	High	High	High	High	High	High	High	A2ALL9 [1124-1132]	A2ALL9 1xPhospho [S1126(100)]	2.92	100	1	117.5	121.7	123.6
FALSE	High	[R].QTTEPASSTR.[H]	Q9R0N8	Synaptotagmin-6 OS=Mus musculus GN=Syt6 PE=1 SV=2		0.967093	0.999121	0.554682	0.380744	0	0.22	-1.21	1.43	1	1.163	0.433	2.691	26.7	26.7	31.1	11.6	39.72	66.08	48.58	53.25	High	High	High	High	High	High	High	High	High	High	High	High	High	High	High	High	Q9R0N8 [162-171]	Q9R0N8 1xPhospho [T164(100)]	2.08	100	1	33.7	21.2	40.8
FALSE	High	[R].SKEPSSPGTDDVFTPGSSDSPSSQR.[I]	Q61165	Sodium/hydrogen exchanger 1 OS=Mus musculus GN=Slc9a1 PE=1 SV=1		0.592484	0.369233	0.606533	0.380842	-0.23	0.22	-0.3	0.29	0.851	1.167	0.814	1.22	26.1	30.7	30.5	25	19.65	8.54	8.98	15.56	High	High	High	High	High	High	High	High	High	High	High	High	High	High	High	High	Q61165 [771-795]		3.93	100	1	24	20.6	28.4
FALSE	High	[R].ELALSSPEDLTQDFEELKR.[E]	A2ARP8	Microtubule-associated protein 1A OS=Mus musculus GN=Map1a PE=1 SV=1		0.991595	0.635383	0.876694	0.38114	0	0.15	-0.06	0.21	0.997	1.113	0.96	1.155	51.4	51.6	57.2	49.5	5.53	5.83	9.52	15.09	High	High	High	High	High	High	High	High	High	High	High	High	High	High	High	High	A2ARP8 [760-778]	A2ARP8 2xPhospho [S764(97.4); S765(97.4)]	1.55	100	1	50.3	53.1	52.5
FALSE	High	[R].EIKPSEKPVSPK.[S]	Q9ES28	Rho guanine nucleotide exchange factor 7 OS=Mus musculus GN=Arhgef7 PE=1 SV=2		0.973428	0.943199	0.899693	0.381196	-0.04	-0.06	0.09	-0.19	0.972	0.962	1.067	0.877	45.7	47	44	50.2	7.37	12.13	10.9	6.29	High	High	High	High	High	High	High	High	High	High	High	High	High	High	High	High	Q9ES28 [219-230]	Q9ES28 1xPhospho [S223(99.3)]	1.98	100	1	43	46.3	45.2
FALSE	High	[K].SELDTIDSQHR.[M]	P43006	Excitatory amino acid transporter 2 OS=Mus musculus GN=Slc1a2 PE=1 SV=1		0.101729	0.851825	0.9998	0.381459	-0.22	0.07	-0.01	-0.14	0.859	1.049	0.992	0.908	34.7	40.4	36.4	40	8.31	4.79	12.31	6.33	High	High	High	High	High	High	High	High	High	High	High	High	High	High	High	High	P43006 [498-508]	P43006 1xPhospho [S505(100)]	3.79	100	1	37.7	34	35.3
FALSE	High	[K].QVDTEEAGMVTAATASNVKASPK.[R]	Q99JF8	PC4 and SFRS1-interacting protein OS=Mus musculus GN=Psip1 PE=1 SV=1		0.926462	0.99997	0.745874	0.381587	-0.06	-0.04	0.17	-0.26	0.962	0.975	1.125	0.835	30.7	31.9	29.9	35.8	12.15	21.63	6.72	14.44	High	High	High	High	High	High	High	High	High	High	High	High	High	High	High	High	Q99JF8 [156-178]	Q99JF8 1xPhospho [S176(100)]	7.42	100	1	25.2	28.9	32.6
FALSE	High	[R].SSSRGSSEASPSR.[D]	Q8VHW2	Voltage-dependent calcium channel gamma-8 subunit OS=Mus musculus GN=Cacng8 PE=1 SV=1		0.787079	0.627325	0.0113201	0.381946	0.19	0.14	0.51	-0.18	1.142	1.099	1.423	0.882	18	15.7	19.7	22.4	12.53	15.95	3.06	12.74	High	High	High	High	High	High	High	High	High	High	High	High	High	High	High	High	Q8VHW2 [275-287]	Q8VHW2 2xPhospho [S280(98.4); S]	2.43	100	1	16.4	19.8	15.4
FALSE	High	[K].LQPQEISPPPTANLDR.[S]	P34152	Focal adhesion kinase 1 OS=Mus musculus GN=Ptk2 PE=1 SV=3		0.795689	0.999901	0.849704	0.383475	0.12	-0.07	-0.15	0.2	1.09	0.95	0.9	1.15	18.7	17.1	17.7	15.4	4.88	8.45	13.13	23.19	High	High	High	High	High	High	High	High	High	High	High	High	High	High	High	High	P34152 [942-957]	P34152 1xPhospho [S948(100)]	4.56	100	1	19.4	18	17.7
FALSE	High	[K].QLSPNGGQEDTR.[M]	E9Q6E0	C-Jun-amino-terminal kinase-interacting protein 3 OS=Mus musculus GN=Mapk8ip3 PE=1 SV=1		0.922756	0.587697	0.753441	0.383586	0.12	-0.23	0.21	-0.32	1.087	0.853	1.154	0.803	13	12	11.1	13.9	17.23	23.53	6.99	5.93	High	High	High	High	High	High	High	High	High	High	High	High	High	High	High	High	E9Q6E0 [644-655]	E9Q6E0 1xPhospho [S646(100)]	3.08	100	1	10.5	15.9	12.6
FALSE	High	[K].ESSESTNTTIEDEDTKVR.[K]	P11798	Calcium/calmodulin-dependent protein kinase type II subunit alpha OS=Mus musculus GN=Camk2a PE=1 SV=2		0.840209	0.95891	0.985913	0.383926	-0.03	-0.09	0.08	-0.2	0.982	0.937	1.057	0.871	200	203.7	187.4	215.3	18.77	16.33	8.85	6.07	High	High	High	High	High	High	High	High	High	High	High	High	High	High	High	High	P11798 [329-346]	P11798 2xPhospho [T336(100); T337(100)]	6.04	100	1	230.8	226.9	176.3
FALSE	High	[R].DLKGPSSQEDESGGLEDSPDRGACSTPEMPQFESVK.[A]	A2AUK5	Band 4.1-like protein 1 OS=Mus musculus GN=Epb41l1 PE=1 SV=1		0.433228	0.971776	0.950253	0.384031	-0.1	-0.08	0.06	-0.24	0.932	0.945	1.04	0.847	27.1	29.1	25.6	30.2	15.14	7.35	15.75	6.73	High	High	High	High	High	High	High	High	High	High	High	High	High	High	High	High	A2AUK5 [660-695]		4.16	100	1	19.6	27.2	27
FALSE	High	[K].TVTMISPEDEQKGEK.[V]	Q8R0A7	Uncharacterized protein KIAA0513 OS=Mus musculus GN=Kiaa0513 PE=1 SV=1		0.989249	0.981787	0.763189	0.3847	-0.04	-0.02	0.04	-0.1	0.975	0.987	1.029	0.935	96.6	99	95.3	101.9	15.62	12.08	5.7	13.33	High	High	High	High	High	High	High	High	High	High	High	High	High	High	High	High	Q8R0A7 [270-284]	Q8R0A7 1xPhospho [S275(100)]	4.76	100	1	80.7	89	104.8
FALSE	High	[R].SDGSTSSDTTSNSFVR.[Q]	A0A0R4J194	Voltage-dependent L-type calcium channel subunit beta-1 OS=Mus musculus GN=Cacnb1 PE=1 SV=1		0.999977	0.658169	0.967752	0.385247	-0.09	0.21	-0.13	0.25	0.937	1.157	0.912	1.189	12.4	13.2	14.3	12.1	10.45	25.08	17.2	9.98	High	High	High	High	High	High	High	High	High	High	High	High	High	High	High	High	A0A0R4J194 [41-56]	A0A0R4J194 2xPhospho [S44(99.5); S47(99.5)]	3.02	100	1	12.9	11.4	11.9
FALSE	High	[K].GSPEQQR.[H]	E0CX32	Coiled-coil domain-containing protein 85A OS=Mus musculus GN=Ccdc85a PE=1 SV=1		0.950339	0.439307	0.919034	0.385946	0.28	-0.94	-0.07	-0.59	1.211	0.522	0.953	0.663	29.7	24.5	15.5	23.4	31.99	26.66	34.93	48.28	High	High	High	High	High	High	High	High	High	High	High	High	High	High	High	High	E0CX32 [283-289]	E0CX32 1xPhospho [S284(100)]	1.62	100	1	32	32.2	27.6
FALSE	High	[K].GGTPAGSTRGSPTRPNPPVR.[N]	E9PWE8	Dihydropyrimidinase-related protein 3 OS=Mus musculus GN=Dpysl3 PE=1 SV=1		0.56412	0.253994	0.741203	0.385973	0.15	-0.32	0.19	-0.35	1.113	0.803	1.142	0.782	75.2	67.6	60.3	77.1	11.13	19.55	32.91	9.33	High	High	High	High	High	High	High	High	High	High	High	High	High	High	High	High	E9PWE8 [625-644]	E9PWE8 2xPhospho [T627(100); S635(96.6)]	2.89	100	1	73.8	92.3	75.4
FALSE	High	[R].CVGNYDNR.[G]	P31324	cAMP-dependent protein kinase type II-beta regulatory subunit OS=Mus musculus GN=Prkar2b PE=1 SV=3		0.957966	0.321988	0.983361	0.386398	-0.08	0.22	-0.05	0.19	0.943	1.165	0.964	1.14	23.8	25.3	27.8	24.3	9.21	15.33	11.37	11.71	High	High	High	High	High	High	High	High	High	High	High	High	High	High	High	High	P31324 [209-216]		1.94	100	1	23.7	21.9	23.9
FALSE	High	[R].SSQSLPSDSSPQLQEQPTG.[-]	F6XIX0	Synaptojanin-1 (Fragment) OS=Mus musculus GN=Synj1 PE=1 SV=1		0.999786	0.409222	0.999206	0.386556	-0.09	0.37	0	0.29	0.941	1.296	1	1.219	9.5	10.1	12.3	10.1	10.88	23.7	10	22.27	High	High	High	High	High	High	High	High	High	High	High	High	High	High	High	High	F6XIX0 [85-103]	F6XIX0 2xPhospho [S88(100); S/T]	1.47	100	1	8.6	9.3	9.6
FALSE	High	[R].ADAHSMELEEK.[T]	P16014	Secretogranin-1 OS=Mus musculus GN=Chgb PE=1 SV=2		0.204163	0.985743	0.853833	0.387475	-0.31	0.03	-0.12	-0.16	0.809	1.019	0.923	0.894	32.5	40.1	33.1	37.1	15.45	5.94	10.61	8.58	High	High	High	High	High	High	High	High	High	High	High	High	High	High	High	High	P16014 [216-226]	P16014 1xPhospho [S220(100)]	3.9	100	1	33.9	42.3	31.1
FALSE	High	[K].MSESLDTADPAVTGAK.[Q]	P63011	Ras-related protein Rab-3A OS=Mus musculus GN=Rab3a PE=1 SV=1		0.999868	0.945703	0.651981	0.387959	0.05	0.1	-0.1	0.24	1.032	1.071	0.933	1.185	42	40.7	45	38	13.51	15.92	10.61	7.47	High	High	High	High	High	High	High	High	High	High	High	High	High	High	High	High	P63011 [187-202]	P63011 1xPhospho [S190(99.7)]	4.37	100	1	40.8	43.3	36
FALSE	High	[R].SRTPSASHEEQQE.[-]	Q8BJU0	Small glutamine-rich tetratricopeptide repeat-containing protein alpha OS=Mus musculus GN=Sgta PE=1 SV=2		0.949026	0.869178	0.509529	0.388107	-0.54	0.6	-0.76	0.83	0.689	1.521	0.591	1.773	22.2	32.2	33.7	19	35.37	31.14	33.94	25.71	High	High	High	High	High	High	High	High	High	High	High	High	High	High	High	High	Q8BJU0 [303-315]	Q8BJU0 2xPhospho [S307(99.2); S/T]	2.05	100	1	18.8	25.7	38
FALSE	High	[K].EDTLSTGAEENAVCESPVETVR.[L]	Q80YN3	Breast carcinoma-amplified sequence 1 homolog OS=Mus musculus GN=Bcas1 PE=1 SV=3		0.876226	0.851941	0.999592	0.388437	-0.21	-0.38	-0.01	-0.58	0.865	0.769	0.996	0.669	15.1	17.4	11.6	17.3	34.91	10.49	29.3	23.13	High	High	High	High	High	High	High	High	High	High	High	High	High	High	High	High	Q80YN3 [428-449]	Q80YN3 1xPhospho [S443(100)]	4.54	100	1	13.8	16.5	9.3
FALSE	High	[K].IYHLPDAESDEDEDFKEQTR.[L]	P42208	Septin-2 OS=Mus musculus GN=Sept2 PE=1 SV=2		0.366026	0.0222929	0.999791	0.388459	-0.1	0.21	0.03	0.08	0.933	1.156	1.023	1.055	122.4	131.1	141.5	134.1	8.09	3.17	8	4.99	High	High	High	High	High	High	High	High	High	High	High	High	High	High	High	High	P42208 [210-229]	P42208 1xPhospho [S218(100)]	5.82	100	1	132.4	115.4	112.8
FALSE	High	[K].VTPQSDGSSSK.[V]	Q61316	Heat shock 70 kDa protein 4 OS=Mus musculus GN=Hspa4 PE=1 SV=1		0.786159	0.0216999	0.825283	0.388688	0.26	-0.53	-0.11	-0.16	1.195	0.695	0.926	0.896	15.7	13.2	10.9	12.2	18.63	16.2	12.42	6.02	High	High	High	High	High	High	High	High	High	High	High	High	High	High	High	High	Q61316 [467-477]	Q61316 1xPhospho [T468(100)]	1.59	100	1	11.4	15.2	16.3
FALSE	High	[R].ADSRESLKPATKPVASK.[S]	P14873	Microtubule-associated protein 1B OS=Mus musculus GN=Map1b PE=1 SV=2		0.979248	0.983425	0.403668	0.389139	-0.07	-0.13	-0.84	0.64	0.954	0.914	0.558	1.561	25.7	27	23.5	15.1	44.7	37.46	40.99	25.57	High	High	High	High	High	High	High	High	High	High	High	High	High	High	High	High	P14873 [539-555]	P14873 2xPhospho [S541(100); S544(100)]	2.09	100	1	39.9	19.7	33.6
FALSE	High	[R].SFSSSADEHS.[-]	Q8VD33	Small glutamine-rich tetratricopeptide repeat-containing protein beta OS=Mus musculus GN=Sgtb PE=1 SV=1		0.884948	0.995581	0.896415	0.389156	0.12	0.26	-0.06	0.43	1.084	1.198	0.961	1.352	18.2	16.8	21.8	16.1	25.25	17.91	20	12.49	High	High	High	High	High	High	High	High	High	High	High	High	High	High	High	High	Q8VD33 [295-304]	Q8VD33 1xPhospho [S297(99.2)]	1.94	100	1	26.8	19.8	16.7
FALSE	High	[R].ADRLEGDRSEGSGQENENEDEE.[-]	Q9DC22	DDB1- and CUL4-associated factor 6 OS=Mus musculus GN=Dcaf6 PE=1 SV=1		0.892367	0.996256	0.884294	0.389339	-0.22	-0.04	0.05	-0.31	0.856	0.975	1.035	0.806	7.6	8.8	7.4	9.1	26.99	13.8	17.48	31.4	High	High	High	High	High	High	High	High	High	High	High	High	High	High	High	High	Q9DC22 [855-876]	Q9DC22 2xPhospho [S863(100); S866(100)]	2.44	100	1	8.8	6.5	6
FALSE	High	[K].NNQITNNQR.[I]	P09041	Phosphoglycerate kinase 2 OS=Mus musculus GN=Pgk2 PE=1 SV=4		0.465036	0.473999	0.39766	0.389479	-0.08	0.13	0.22	-0.17	0.949	1.095	1.169	0.889	91.4	96.4	100.1	112.6	4.42	13.24	6.46	7.39	High	High	High	High	High	High	High	High	High	High	High	High	High	High	High	High	P09041 [31-39]		2.67	100	1	86.1	92.3	90.6
FALSE	High	[K].TKKDDSHSAEDSEDEKDDHK.[N]	A0A087WRY3	Nuclear ubiquitous casein and cyclin-dependent kinase substrate 1 OS=Mus musculus GN=Nucks1 PE=1 SV=1		0.94158	0.291637	0.98536	0.389809	0.17	-0.33	0.12	-0.28	1.122	0.796	1.087	0.821	38.7	34.5	30.8	37.5	20.79	27.64	14.62	9.87	High	High	High	High	High	High	High	High	High	High	High	High	High	High	High	High	A0A087WRY3 [68-87]	A0A087WRY3 3xPhospho [S73(97.5); S75(99.9); S79(99.9)]	2.2	100	1	44.7	49.7	33.6
FALSE	High	[R].AGDSDEESRTDDKGVMDYYLK.[Y]	O88939	Zinc finger and BTB domain-containing protein 7A OS=Mus musculus GN=Zbtb7a PE=1 SV=2		0.999189	0.895156	0.708749	0.389914	-0.06	0.09	-0.17	0.19	0.957	1.065	0.891	1.144	33.3	34.8	35.5	31	20.03	14.84	8.22	9.05	High	High	High	High	High	High	High	High	High	High	High	High	High	High	High	High	O88939 [328-348]	O88939 1xPhospho [S331(98.2)]	2.91	100	1	34.5	32.2	27.4
FALSE	High	[K].SMSLDMGQPSQANTK.[K]	Q5SYH9	Neurofibromin (Fragment) OS=Mus musculus GN=Nf1 PE=1 SV=1		0.618782	0.51521	0.753275	0.390207	-0.13	-0.33	-0.24	-0.22	0.911	0.798	0.844	0.861	16.6	18.2	13.2	15.4	22.87	12.71	7.17	15.16	High	High	High	High	High	High	High	High	High	High	High	High	High	High	High	High	Q5SYH9 [507-521]		2.87	100	1	15.2	11.5	20
FALSE	High	[R].ASLLESSAAGSPR.[S]	H3BIV5	A-kinase anchor protein 5 OS=Mus musculus GN=Akap5 PE=1 SV=1		0.951972	0.990341	0.289249	0.390391	0.15	-0.13	0.35	-0.34	1.108	0.911	1.273	0.792	80.4	72.6	73.2	92.4	14.82	16.59	12.94	10.09	High	High	High	High	High	High	High	High	High	High	High	High	High	High	High	High	H3BIV5 [248-260]	H3BIV5 1xPhospho [S258(100)]	4.53	100	1	67.8	89.7	72.1
FALSE	High	[R].SRSYTPEYR.[R]	E9QP00	Transformer-2 protein homolog alpha OS=Mus musculus GN=Tra2a PE=1 SV=1		0.990382	0.950785	0.84243	0.390394	0.03	-0.21	0.14	-0.32	1.023	0.867	1.104	0.803	16.6	16.2	14.4	17.9	23.88	14.48	11.12	3.48	High	High	High	High	High	High	High	High	High	High	High	High	High	High	High	High	E9QP00 [82-90]	E9QP00 3xPhospho [S82(100); S84(100); T86(100)]	2.06	100	1	16.4	20.7	16.7
FALSE	High	[R].EQESSGEEDNDLSPEEREKK.[R]	Q9DCL8	Protein phosphatase inhibitor 2 OS=Mus musculus GN=Ppp1r2 PE=1 SV=3		0.989816	0.812121	0.967132	0.39167	0.1	0.56	-0.06	0.72	1.071	1.476	0.958	1.651	10.6	9.9	15.6	9.4	66.62	27	24.49	37.85	High	High	High	High	High	High	High	High	High	High	High	High	High	High	High	High	Q9DCL8 [119-138]	Q9DCL8 3xPhospho [S122(100); S123(100); S131(100)]	2.15	100	1	6.5	9.7	11.6
FALSE	High	[K].ELSGESDELGISQDEQLSK.[S]	Q8R550	SH3 domain-containing kinase-binding protein 1 OS=Mus musculus GN=Sh3kbp1 PE=1 SV=1		0.229255	0.0679822	0.810187	0.391758	0.11	-0.2	0	-0.08	1.082	0.872	1	0.944	40.7	37.6	35.5	37.6	4.18	9.94	10.42	3.55	High	High	High	High	High	High	High	High	High	High	High	High	High	High	High	High	Q8R550 [154-172]	Q8R550 1xPhospho [S156(100)]	5.61	100	1	40.1	41.7	38
FALSE	High	[K].DKEETEGNESSEATSPVNAIYSLA.[-]	A0A087WPX3	Neurofascin OS=Mus musculus GN=Nfasc PE=1 SV=1		0.91621	0.972702	0.937742	0.392284	-0.1	-0.06	0.11	-0.27	0.935	0.957	1.078	0.83	16.1	17.3	15.4	18.6	21.04	14.08	14.29	17.35	High	High	High	High	High	High	High	High	High	High	High	High	High	High	High	High	A0A087WPX3 [1324-1347]	A0A087WPX3 3xPhospho [S1333(100); S1334(100); T1337(98.9)]	4.05	100	1	12.4	20.6	15.3
FALSE	High	[R].GAATEPSQEGSTEGEEEDATEAWR.[L]	A0A0R4J0D5	Vacuolar fusion protein MON1 homolog A OS=Mus musculus GN=Mon1a PE=1 SV=1		0.834511	0.985628	0.965821	0.392326	-0.2	-0.04	0.16	-0.4	0.87	0.971	1.117	0.756	21.8	25	21.2	28	30.13	23.67	2.82	14.68	High	High	High	High	High	High	High	High	High	High	High	High	High	High	High	High	A0A0R4J0D5 [130-153]	A0A0R4J0D5 2xPhospho [S140(100); T141(100)]	2.9	100	1	25.8	18.4	16.5
FALSE	High	[K].NLAKPGVTSTSDSEDEDDQEGEKK.[R]	Q99JF8	PC4 and SFRS1-interacting protein OS=Mus musculus GN=Psip1 PE=1 SV=1		0.84326	0.12154	0.999995	0.392418	-0.21	0.48	0.01	0.26	0.864	1.398	1.008	1.197	10	11.6	14	11.7	14.1	15.08	22.22	19.99	High	High	High	High	High	High	High	High	High	High	High	High	High	High	High	High	Q99JF8 [262-285]	Q99JF8 2xPhospho [S274(98.6); T/S]	1.71	100	1	11	10.3	7.8
FALSE	High	[R].GGPAEAPSPRGSPRPESR.[A]	B1AZA5	Transmembrane protein 245 OS=Mus musculus GN=Tmem245 PE=1 SV=1		0.510763	0.655999	0.527073	0.392616	-0.33	0.2	0.22	-0.35	0.793	1.151	1.161	0.786	8.5	10.7	9.8	12.5	11.13	26.61	19.29	23.88	High	High	High	High	High	High	High	High	High	High	High	High	High	High	High	High	B1AZA5 [5-22]	B1AZA5 2xPhospho [S12(100); S16(99.1)]	2.08	100	1	8.3	8.7	6.9
FALSE	High	[-].MEASAAEQPSSPPPPLGDHCIHDGDFVVLK.[R]	Q8CE96	tRNA (adenine(58)-N(1))-methyltransferase non-catalytic subunit TRM6 OS=Mus musculus GN=Trmt6 PE=1 SV=1		0.997583	0.992732	0.352468	0.392788	0.02	-0.09	-0.3	0.23	1.015	0.937	0.81	1.173	9.3	9.2	8.7	7.5	7.33	12.84	9.34	38.11	High	High	High	High	High	High	High	High	High	High	High	High	High	High	High	High	Q8CE96 [1-30]	Q8CE96 1xAcetyl [N-Term]; 1xPhospho [S4(98.4)]	3.96	100	1	9.1	9.5	8.6
FALSE	High	[K].EGVEYR.[I]	Q99PT1	Rho GDP-dissociation inhibitor 1 OS=Mus musculus GN=Arhgdia PE=1 SV=3		0.999999	0.968454	0.650587	0.392813	-0.09	0.05	0.28	-0.33	0.937	1.035	1.216	0.798	9.4	10	9.7	12.2	17.01	20.52	24.66	16.57	High	High	High	High	High	High	High	High	High	High	High	High	High	High	High	High	Q99PT1 [106-111]		1.16	100	1	10	11.7	8.8
FALSE	High	[R].LRSSMSENR.[M]	E9PUA3	IQ motif and SEC7 domain-containing protein 1 OS=Mus musculus GN=Iqsec1 PE=1 SV=1		0.979113	0.979479	0.12644	0.393429	-0.2	-0.27	-0.84	0.37	0.871	0.829	0.558	1.293	7.9	9	6.5	5	28.96	49.41	21.54	17.74	High	High	High	High	High	High	High	High	High	High	High	High	High	High	High	High	E9PUA3 [142-150]	E9PUA3 2xPhospho [S147(100); S]	1.31	100	1	8.9	7	10.8
FALSE	High	[R].QPSRQSER.[T]	A0A0A6YVS6	Ras/Rap GTPase-activating protein SynGAP (Fragment) OS=Mus musculus GN=Syngap1 PE=1 SV=2		0.999014	0.792661	0.828257	0.394489	-0.16	-0.21	-0.01	-0.36	0.892	0.863	0.991	0.777	50.1	56.1	43.2	55.6	16.97	22.67	29.74	11.27	High	High	High	High	High	High	High	High	High	High	High	High	High	High	High	High	A0A0A6YVS6 [718-725]	A0A0A6YVS6 1xPhospho [S720(100)]	1.41	100	1	44.6	45.8	54.7
FALSE	High	[R].SRTSVQTEDDQLIAGQSAR.[A]	E0CXB9; P26231	Catenin alpha-2 OS=Mus musculus GN=Ctnna2 PE=1 SV=1 Catenin alpha-1 OS=Mus musculus GN=Ctnna1 PE=1 SV=1	Shared	0.999941	0.994668	0.307664	0.394915	0.15	-0.12	-0.35	0.38	1.11	0.92	0.783	1.304	157.4	141.8	144.8	111	20.41	22.47	21.95	7.13	High	High	High	High	High	High	High	High	High	High	High	High	High	High	High	High	E0CXB9 [664-682]; P26231 [652-670]	E0CXB9 2xPhospho [S667(98.5); T670(100)]; P26231 2xPhospho [S655(98.5); T658(100)]	6.26	100	2	170.4	157	157.7
[truncated: 6,041 more rows]
[truncated: 13 more columns]
